# Supplementary material for: Reduced expression of SOX7 in ovarian cancer: a novel tumor suppressor through the Wnt/β-catenin signaling pathway
Source: Springer Nature journal article supplement (doi:10.1186/s13048-014-0087-1), 2014-09-04
Supplement: MOESM1 [file 9778460]

Short-listed 7933 genes were co-expressed with SOX7 by Pearson correlation ( $FDR < 0.01$ ) in GSE27651

| Number | Gene   | EntrezGene | Fdr         | Correlation Coefficient |
|--------|--------|------------|-------------|-------------------------|
| 1      | NAT2   | 10         | 0.000513216 | 0.521953398             |
| 2      | AAMP   | 14         | 0.002578854 | -0.463809284            |
| 3      | AANAT  | 15         | 4.50E-07    | 0.687615139             |
| 4      | ABCA2  | 20         | 0.00033142  | 0.535889973             |
| 5      | ABCB7  | 22         | 0.000125177 | -0.56417787             |
| 6      | ABCF1  | 23         | 4.98E-08    | 0.72395679              |
| 7      | ABCA4  | 24         | 5.65E-07    | 0.683662042             |
| 8      | ABL1   | 25         | 1.88E-05    | -0.612299095            |
| 9      | ABO    | 28         | 0.003272509 | 0.454277393             |
| 10     | ACAA1  | 30         | 6.94E-07    | -0.679867807            |
| 11     | ACACA  | 31         | 1.25E-05    | 0.621637458             |
| 12     | ACADL  | 33         | 5.51E-06    | 0.639549184             |
| 13     | ACADM  | 34         | 0.000898826 | -0.5029226              |
| 14     | ACADS  | 35         | 0.008911061 | -0.410342016            |
| 15     | ACADV1 | 37         | 0.001810363 | -0.477308146            |
| 16     | ACCN1  | 40         | 9.07E-11    | 0.811074864             |
| 17     | ACCN2  | 41         | 2.58E-09    | 0.766461128             |
| 18     | ACR    | 49         | 3.66E-05    | 0.59631723              |
| 19     | ACO2   | 50         | 0.000720254 | -0.510553049            |
| 20     | ACRV1  | 56         | 8.94E-10    | 0.780831535             |
| 21     | ACTB   | 60         | 0.000354905 | -0.53368132             |
| 22     | ACTG1  | 71         | 1.73E-05    | -0.614198145            |
| 23     | ACTG2  | 72         | 5.86E-09    | 0.755341564             |
| 24     | ACTN1  | 87         | 0.000245481 | -0.544983               |
| 25     | ACTN2  | 88         | 2.08E-07    | 0.700988954             |
| 26     | ACVR1B | 91         | 0.004391957 | -0.441953464            |
| 27     | ACVR2A | 92         | 5.94E-05    | 0.584068417             |
| 28     | ACY1   | 97         | 0.004149916 | -0.444414307            |
| 29     | ADAM10 | 102        | 0.00390117  | -0.446948211            |
| 30     | ADAR   | 103        | 8.17E-06    | -0.631159613            |
| 31     | ADARB1 | 104        | 6.95E-05    | 0.580046518             |
| 32     | ADCY1  | 107        | 0.001171582 | 0.493387984             |
| 33     | ADCY3  | 109        | 0.003990357 | 0.446037688             |
| 34     | ADCY5  | 111        | 8.27E-05    | 0.575487931             |
| 35     | ADCY6  | 112        | 1.25E-08    | 0.744756905             |
| 36     | ADCY7  | 113        | 9.70E-11    | 0.810155776             |
| 37     | ADD1   | 118        | 0.000141826 | -0.560749048            |
| 38     | ADD2   | 119        | 0.000764707 | 0.508567761             |
| 39     | ADD3   | 120        | 0.000371602 | -0.532206773            |

|    |         |     |             |              |
|----|---------|-----|-------------|--------------|
| 40 | ADH1A   | 124 | 9.17E-07    | 0.674746156  |
| 41 | ADH5    | 128 | 0.001159337 | -0.493762811 |
| 42 | ADORA2B | 136 | 9.48E-10    | 0.779939701  |
| 43 | ADPRH   | 141 | 2.63E-07    | 0.696942065  |
| 44 | ADRA1D  | 146 | 3.13E-06    | 0.651155021  |
| 45 | ADRA2A  | 150 | 0.003146724 | 0.455894529  |
| 46 | ADRB2   | 154 | 0.000297284 | 0.539200803  |
| 47 | ADRB3   | 155 | 1.15E-10    | 0.807913909  |
| 48 | ADRBK1  | 156 | 1.32E-08    | 0.744086115  |
| 49 | ADSL    | 158 | 0.000233606 | -0.546436971 |
| 50 | AP2A2   | 161 | 0.00466349  | -0.439475302 |
| 51 | APIG1   | 164 | 0.000819717 | 0.506067723  |
| 52 | AGT     | 183 | 0.002888855 | 0.45929497   |
| 53 | AGTR2   | 186 | 5.30E-06    | 0.640352693  |
| 54 | AGXT    | 189 | 0.004311475 | 0.442762568  |
| 55 | AHCY    | 191 | 0.000918994 | -0.502070596 |
| 56 | AIF1    | 199 | 2.44E-09    | 0.767258041  |
| 57 | AK2     | 204 | 0.001712933 | -0.479431991 |
| 58 | AKT1    | 207 | 0.00214153  | -0.47097635  |
| 59 | ALAS2   | 212 | 4.72E-08    | 0.724821937  |
| 60 | ALB     | 213 | 0.000198494 | 0.551185222  |
| 61 | ALDH9A1 | 223 | 0.000371591 | -0.532213656 |
| 62 | ABCD2   | 225 | 5.48E-05    | 0.586202008  |
| 63 | ALDOA   | 226 | 0.000352167 | -0.533938831 |
| 64 | ALDOAP2 | 228 | 0.008023184 | 0.415381494  |
| 65 | ALDOC   | 230 | 0.000678036 | 0.512630639  |
| 66 | ALPL    | 249 | 3.62E-10    | 0.792503241  |
| 67 | AMBN    | 258 | 4.44E-10    | 0.789722556  |
| 68 | AMBP    | 259 | 4.02E-07    | 0.689669065  |
| 69 | AMHR2   | 269 | 0.001411956 | 0.486598009  |
| 70 | AMPD2   | 271 | 1.25E-05    | -0.621688363 |
| 71 | AMPH    | 273 | 0.000343759 | 0.534746474  |
| 72 | ANK1    | 286 | 2.58E-09    | 0.766435438  |
| 73 | SLC25A4 | 291 | 0.005353002 | -0.433503724 |
| 74 | SLC25A6 | 293 | 2.69E-05    | -0.603806658 |
| 75 | ANXA2P1 | 303 | 1.78E-08    | 0.739744162  |
| 76 | ANXA6   | 309 | 5.22E-11    | 0.819767729  |
| 77 | ANXA11  | 311 | 0.000322483 | -0.536738094 |
| 78 | AOC2    | 314 | 0.007320269 | 0.419659022  |
| 79 | APBA1   | 320 | 1.09E-09    | 0.778008813  |
| 80 | APBB2   | 323 | 9.38E-10    | 0.780100745  |
| 81 | APC     | 324 | 5.84E-08    | 0.721513546  |
| 82 | AIRE    | 326 | 0.002622404 | 0.463155035  |
| 83 | APEH    | 327 | 0.000196193 | -0.55151034  |
| 84 | APEX1   | 328 | 0.008774718 | -0.411085087 |

|     |         |     |             |              |
|-----|---------|-----|-------------|--------------|
| 85  | BIRC2   | 329 | 2.05E-05    | -0.610263728 |
| 86  | APLP1   | 333 | 0.003577408 | -0.4506282   |
| 87  | APLP2   | 334 | 0.003010668 | -0.457650899 |
| 88  | APOA2   | 336 | 3.80E-05    | 0.595402693  |
| 89  | APOA4   | 337 | 4.83E-09    | 0.758044146  |
| 90  | APOB    | 338 | 7.94E-07    | 0.677416267  |
| 91  | APOC2   | 344 | 2.29E-10    | 0.798503432  |
| 92  | APOC3   | 345 | 1.57E-05    | 0.616579624  |
| 93  | APOD    | 347 | 2.47E-05    | 0.605815327  |
| 94  | APOH    | 350 | 4.17E-10    | 0.790661297  |
| 95  | APP     | 351 | 0.00068128  | -0.512468385 |
| 96  | APRT    | 353 | 0.006988612 | -0.421784084 |
| 97  | KLK3    | 354 | 2.05E-09    | 0.769558955  |
| 98  | SHROOM2 | 357 | 0.007352678 | -0.419410869 |
| 99  | AQP2    | 359 | 0.003207647 | 0.455090563  |
| 100 | AQP4    | 361 | 0.000239935 | 0.545657863  |
| 101 | ARAF    | 369 | 0.000179089 | -0.554146415 |
| 102 | TRIM23  | 373 | 0.00024451  | 0.545095849  |
| 103 | ARF1    | 375 | 0.000709213 | -0.511092267 |
| 104 | ARF3    | 377 | 0.000917216 | -0.50213681  |
| 105 | ARF4    | 378 | 0.001226803 | -0.491777183 |
| 106 | ARF6    | 382 | 0.000803459 | -0.506829358 |
| 107 | ARG1    | 383 | 5.94E-08    | 0.721205749  |
| 108 | ARHGAP1 | 392 | 1.09E-05    | -0.624750622 |
| 109 | ARHGAP6 | 395 | 7.72E-10    | 0.782673705  |
| 110 | RHOH    | 399 | 1.90E-08    | 0.738724459  |
| 111 | ARL3    | 403 | 0.008241216 | -0.4140694   |
| 112 | ARNT    | 405 | 2.80E-06    | 0.653426825  |
| 113 | ARR3    | 407 | 0.000575379 | 0.518193809  |
| 114 | ARRB1   | 408 | 1.48E-11    | 0.840739966  |
| 115 | ARSB    | 411 | 2.02E-05    | 0.610666581  |
| 116 | ARSF    | 416 | 4.73E-06    | 0.642719552  |
| 117 | ART1    | 417 | 5.24E-07    | 0.684988308  |
| 118 | ART4    | 420 | 3.16E-08    | 0.730937731  |
| 119 | ASCL1   | 429 | 1.47E-10    | 0.804827095  |
| 120 | ASGR2   | 433 | 4.53E-10    | 0.789438504  |
| 121 | ASIP    | 434 | 3.95E-09    | 0.760880086  |
| 122 | ASL     | 435 | 0.004604767 | -0.439996975 |
| 123 | Unknown | 438 | 2.22E-07    | 0.699859965  |
| 124 | ASPA    | 443 | 0.000137826 | 0.56154436   |
| 125 | ASS1    | 445 | 0.000157499 | -0.557804794 |
| 126 | ATF1    | 466 | 0.007243475 | -0.42017957  |
| 127 | ATF4    | 468 | 1.72E-05    | -0.614447659 |
| 128 | ATIC    | 471 | 0.000121462 | -0.565021822 |
| 129 | ATM     | 472 | 0.000204    | 0.550405005  |

|     |          |     |             |              |
|-----|----------|-----|-------------|--------------|
| 130 | RERE     | 473 | 0.000852094 | -0.504765437 |
| 131 | ATOH1    | 474 | 9.59E-10    | 0.779770451  |
| 132 | ATP12A   | 479 | 1.28E-05    | 0.621106395  |
| 133 | ATP1B3   | 483 | 0.0059645   | -0.428746429 |
| 134 | ATP2A3   | 489 | 0.000352592 | 0.533893876  |
| 135 | ATP2B3   | 492 | 0.000201591 | 0.5507427    |
| 136 | ATP4A    | 495 | 1.11E-09    | 0.7777615    |
| 137 | ATP5A1   | 498 | 0.000365916 | -0.532682668 |
| 138 | ALDH7A1  | 501 | 0.004036836 | -0.445539765 |
| 139 | ATP5B    | 506 | 0.005240647 | -0.434460621 |
| 140 | ATP5C1   | 509 | 0.000707815 | -0.511184966 |
| 141 | ATP5D    | 513 | 0.005765078 | -0.430327723 |
| 142 | ATP5E    | 514 | 1.24E-05    | -0.621897122 |
| 143 | ATP5F1   | 515 | 0.003161139 | -0.455693313 |
| 144 | ATP5G1   | 516 | 0.000110789 | -0.567638369 |
| 145 | ATP5G2   | 517 | 4.73E-06    | -0.642716703 |
| 146 | ATP5I    | 521 | 0.003292861 | -0.45401705  |
| 147 | ATP5J    | 522 | 6.52E-05    | -0.581655818 |
| 148 | ATP6V0C  | 527 | 0.003784285 | -0.448282508 |
| 149 | ATP6V1E1 | 529 | 0.004846323 | -0.437847537 |
| 150 | ATP6V0B  | 533 | 0.003550669 | -0.450923804 |
| 151 | ATP6V1G2 | 534 | 1.01E-07    | 0.712790677  |
| 152 | ATP6AP1  | 537 | 0.009953468 | -0.405031031 |
| 153 | ATP5O    | 539 | 1.27E-05    | -0.621398423 |
| 154 | ATR      | 545 | 0.000170876 | -0.555478944 |
| 155 | ATRX     | 546 | 9.66E-05    | -0.571356234 |
| 156 | AUH      | 549 | 0.000552061 | -0.519563483 |
| 157 | AUP1     | 550 | 0.006228015 | -0.426894807 |
| 158 | AVPR1A   | 552 | 1.46E-07    | 0.706970978  |
| 159 | AVPR1B   | 553 | 2.12E-06    | 0.65898287   |
| 160 | BAGE     | 574 | 2.48E-11    | 0.831704855  |
| 161 | BAI1     | 575 | 0.0064943   | -0.425096713 |
| 162 | BAI3     | 577 | 3.90E-06    | 0.646713853  |
| 163 | BAK1     | 578 | 4.33E-10    | 0.790065804  |
| 164 | BBS1     | 582 | 0.001546962 | 0.483206518  |
| 165 | BBS2     | 583 | 0.001497208 | -0.48443261  |
| 166 | BCAT2    | 587 | 0.000412513 | -0.528955013 |
| 167 | BCKDHA   | 593 | 1.64E-06    | 0.663921296  |
| 168 | BCKDHB   | 594 | 2.50E-09    | 0.76682406   |
| 169 | BCL2L1   | 598 | 0.002578619 | -0.463818459 |
| 170 | BCL6     | 604 | 0.004268046 | -0.443190132 |
| 171 | BCL8     | 606 | 2.18E-06    | 0.658358779  |
| 172 | TNFRSF17 | 608 | 0.009412735 | 0.40767012   |
| 173 | HCN2     | 610 | 1.12E-05    | -0.624048812 |
| 174 | BDKRB1   | 623 | 0.000115162 | 0.566526482  |

|     |          |     |             |              |
|-----|----------|-----|-------------|--------------|
| 175 | CFB      | 629 | 0.001992426 | -0.473663191 |
| 176 | PRDM1    | 639 | 9.29E-06    | 0.628299178  |
| 177 | BLM      | 641 | 0.009381196 | 0.407855221  |
| 178 | BMP3     | 651 | 0.0018637   | 0.476167362  |
| 179 | BMP7     | 655 | 0.004962826 | 0.436773223  |
| 180 | BMP8B    | 656 | 9.49E-10    | 0.779908993  |
| 181 | BMPR1B   | 658 | 0.002226992 | -0.469516474 |
| 182 | BMX      | 660 | 4.28E-08    | 0.726292654  |
| 183 | BPI      | 671 | 2.79E-10    | 0.795816885  |
| 184 | BRCA1    | 672 | 0.001103145 | 0.495533105  |
| 185 | BRAF     | 673 | 3.85E-08    | 0.727890562  |
| 186 | BRCA2    | 675 | 0.007307286 | 0.419732662  |
| 187 | BRDT     | 676 | 0.006309629 | 0.426330049  |
| 188 | ZFP36L2  | 678 | 0.002148031 | -0.470852464 |
| 189 | BRS3     | 680 | 4.57E-06    | 0.643457627  |
| 190 | KLF9     | 687 | 0.000189123 | 0.552589945  |
| 191 | KLF5     | 688 | 0.000474406 | -0.524518917 |
| 192 | BTF3     | 689 | 0.000772296 | -0.508180828 |
| 193 | BTN1A1   | 696 | 3.91E-09    | 0.761005819  |
| 194 | C3AR1    | 719 | 0.009326073 | 0.408121205  |
| 195 | C4BPB    | 725 | 6.17E-05    | 0.583050525  |
| 196 | CAPN5    | 726 | 0.000492557 | -0.523296613 |
| 197 | C5       | 727 | 2.98E-06    | 0.65211989   |
| 198 | C8B      | 732 | 2.91E-05    | 0.601888927  |
| 199 | OSGIN2   | 734 | 1.86E-05    | 0.61254226   |
| 200 | C11orf2  | 738 | 1.40E-05    | -0.619118123 |
| 201 | MRPL49   | 740 | 0.0076713   | -0.417437768 |
| 202 | ZNHIT2   | 741 | 1.01E-07    | 0.71289592   |
| 203 | C11orf10 | 746 | 5.29E-06    | -0.640399691 |
| 204 | C16orf3  | 750 | 1.25E-10    | 0.806712605  |
| 205 | PTTG1IP  | 754 | 9.52E-05    | -0.571767512 |
| 206 | TMEM50B  | 757 | 0.003087759 | -0.456688172 |
| 207 | MPPED1   | 758 | 6.91E-05    | 0.580168726  |
| 208 | CA1      | 759 | 3.03E-11    | 0.827351446  |
| 209 | CA5A     | 763 | 0.001346186 | 0.488449527  |
| 210 | CACNA1F  | 778 | 1.13E-11    | 0.85181174   |
| 211 | CACNA1S  | 779 | 1.44E-09    | 0.774271314  |
| 212 | DDR1     | 780 | 4.24E-06    | -0.644968493 |
| 213 | CACNB2   | 783 | 0.003653117 | 0.449725002  |
| 214 | CACNB3   | 784 | 0.003268597 | -0.454329714 |
| 215 | CACNB4   | 785 | 8.78E-08    | 0.715035166  |
| 216 | CACNG1   | 786 | 9.66E-07    | 0.673769278  |
| 217 | S100G    | 795 | 0.001620315 | 0.481515357  |
| 218 | CALCA    | 796 | 0.007961714 | 0.415733357  |
| 219 | CALCB    | 797 | 0.000564593 | 0.518805228  |

|     |         |     |             |              |
|-----|---------|-----|-------------|--------------|
| 220 | CALCR   | 799 | 0.006875145 | 0.422525764  |
| 221 | CALM1   | 801 | 0.008036948 | -0.415299058 |
| 222 | CALM2   | 805 | 0.001261288 | -0.490769741 |
| 223 | CALML3  | 810 | 7.59E-08    | 0.717320161  |
| 224 | CAMK2A  | 815 | 0.000384573 | 0.531147415  |
| 225 | CAMLG   | 819 | 5.86E-05    | -0.584406124 |
| 226 | CAMP    | 820 | 0.001407242 | -0.486748067 |
| 227 | CAPN2   | 824 | 0.002945515 | -0.458526693 |
| 228 | CAPZA1  | 829 | 2.53E-05    | -0.605301638 |
| 229 | CARS    | 833 | 5.91E-06    | -0.638083931 |
| 230 | CASP3   | 836 | 0.00433672  | -0.442510077 |
| 231 | CASP10  | 843 | 3.07E-06    | 0.651514084  |
| 232 | CASQ1   | 844 | 4.00E-07    | 0.689759742  |
| 233 | CASQ2   | 845 | 1.13E-09    | 0.777432924  |
| 234 | CASR    | 846 | 1.30E-11    | 0.847529663  |
| 235 | CAT     | 847 | 0.000605481 | -0.516519587 |
| 236 | CAV3    | 859 | 2.41E-09    | 0.767417249  |
| 237 | CBFA2T3 | 863 | 2.29E-05    | 0.607728327  |
| 238 | CBFB    | 865 | 0.002803402 | -0.460445274 |
| 239 | CBLN1   | 869 | 1.41E-10    | 0.805339268  |
| 240 | CBR1    | 873 | 0.00679483  | -0.42305205  |
| 241 | CCK     | 885 | 0.005944332 | 0.428914948  |
| 242 | CCKAR   | 886 | 3.99E-06    | 0.646246988  |
| 243 | CCKBR   | 887 | 2.48E-06    | 0.655805448  |
| 244 | KRIT1   | 889 | 0.004907678 | -0.437277054 |
| 245 | CCNG2   | 901 | 8.89E-05    | -0.573612464 |
| 246 | CCNT1   | 904 | 1.70E-10    | 0.802508181  |
| 247 | CCNT2   | 905 | 0.000610386 | -0.516240408 |
| 248 | CCT6A   | 908 | 0.000104683 | -0.569229248 |
| 249 | CD1A    | 909 | 1.59E-07    | 0.705510154  |
| 250 | CD1B    | 910 | 1.78E-09    | 0.771398247  |
| 251 | CD2     | 914 | 6.63E-08    | 0.719437747  |
| 252 | CD3E    | 916 | 1.44E-09    | 0.774305762  |
| 253 | CD3G    | 917 | 0.00588508  | 0.429358406  |
| 254 | CD247   | 919 | 3.34E-05    | 0.598539449  |
| 255 | CD4     | 920 | 1.89E-09    | 0.770649374  |
| 256 | MS4A1   | 931 | 4.04E-07    | 0.689519045  |
| 257 | CD28    | 940 | 0.00433188  | 0.442555578  |
| 258 | CD80    | 941 | 2.26E-10    | 0.798816228  |
| 259 | CD86    | 942 | 6.70E-08    | 0.719270653  |
| 260 | TNFSF8  | 944 | 5.34E-11    | 0.819236511  |
| 261 | CD33    | 945 | 0.004574277 | 0.440266113  |
| 262 | CD36    | 948 | 0.000396831 | 0.530186798  |
| 263 | SCARB2  | 950 | 8.73E-05    | -0.57407862  |
| 264 | CD37    | 951 | 4.54E-05    | 0.590960601  |

|     |         |      |             |              |
|-----|---------|------|-------------|--------------|
| 265 | ENTPD2  | 954  | 2.69E-11    | 0.829775361  |
| 266 | ENTPD6  | 955  | 5.71E-07    | 0.683461601  |
| 267 | ENTPD5  | 957  | 4.05E-11    | 0.823054715  |
| 268 | CD40LG  | 959  | 6.42E-08    | 0.719927253  |
| 269 | CD47    | 961  | 0.002757868 | -0.461090854 |
| 270 | CD53    | 963  | 1.05E-09    | 0.778505607  |
| 271 | CD59    | 966  | 0.00139464  | -0.487087146 |
| 272 | CD63    | 967  | 0.002098173 | -0.471760859 |
| 273 | CD68    | 968  | 2.58E-05    | 0.604841834  |
| 274 | CD72    | 971  | 0.00028189  | 0.540806227  |
| 275 | CD74    | 972  | 0.008709631 | -0.411405184 |
| 276 | CD151   | 977  | 0.003129414 | -0.456122963 |
| 277 | CDA     | 978  | 1.38E-05    | 0.619457631  |
| 278 | 7-Sep   | 989  | 0.000986334 | -0.499539677 |
| 279 | CDC34   | 997  | 0.004448609 | -0.441411553 |
| 280 | CDC42   | 998  | 0.006536433 | -0.424804311 |
| 281 | CDH1    | 999  | 0.000772296 | -0.508177945 |
| 282 | CDH4    | 1002 | 2.02E-08    | 0.737885797  |
| 283 | CDH7    | 1005 | 4.09E-11    | 0.822942767  |
| 284 | CDH9    | 1007 | 0.000825286 | -0.505837845 |
| 285 | CDH10   | 1008 | 2.33E-05    | 0.607319377  |
| 286 | CDH17   | 1015 | 3.91E-07    | 0.69014225   |
| 287 | CDK2    | 1017 | 2.27E-06    | 0.657503874  |
| 288 | CDK8    | 1024 | 0.000401231 | -0.529822765 |
| 289 | CDKN1B  | 1027 | 0.002453489 | -0.465825141 |
| 290 | CDKN2D  | 1032 | 0.001543183 | 0.483327136  |
| 291 | CDSN    | 1041 | 2.06E-11    | 0.835063798  |
| 292 | CDX1    | 1044 | 7.98E-05    | 0.576449972  |
| 293 | CDX2    | 1045 | 1.15E-05    | 0.62360836   |
| 294 | CDX4    | 1046 | 0.001133176 | 0.494595853  |
| 295 | CELP    | 1057 | 1.64E-07    | 0.704998198  |
| 296 | CETN1   | 1068 | 5.26E-08    | 0.723101173  |
| 297 | CETP    | 1071 | 3.18E-10    | 0.794207112  |
| 298 | CFL1    | 1072 | 0.002230963 | -0.469429986 |
| 299 | CFTR    | 1080 | 0.007358482 | 0.419370058  |
| 300 | CGA     | 1081 | 1.62E-10    | 0.803405976  |
| 301 | CEACAM3 | 1084 | 1.68E-05    | 0.614961411  |
| 302 | CEACAM8 | 1088 | 4.51E-05    | 0.591140532  |
| 303 | CHAT    | 1103 | 4.97E-06    | 0.641697789  |
| 304 | RCC1    | 1104 | 0.007258204 | -0.420028699 |
| 305 | CHD2    | 1106 | 0.00139785  | -0.486998017 |
| 306 | CHD4    | 1108 | 0.000439499 | -0.52694009  |
| 307 | FOXN3   | 1112 | 4.73E-08    | 0.724763361  |
| 308 | CHIT1   | 1118 | 0.002274954 | 0.468671746  |
| 309 | CHKA    | 1119 | 0.009856772 | -0.405500457 |

|     |         |      |             |              |
|-----|---------|------|-------------|--------------|
| 310 | CHRM2   | 1129 | 4.90E-09    | 0.757819974  |
| 311 | LYST    | 1130 | 0.001674556 | 0.480249051  |
| 312 | CHRM5   | 1133 | 1.20E-10    | 0.807294174  |
| 313 | CHRNA1  | 1134 | 6.47E-09    | 0.754006276  |
| 314 | CHRNA2  | 1135 | 0.000260829 | 0.543138342  |
| 315 | CHRNA3  | 1136 | 1.06E-10    | 0.808899514  |
| 316 | CHRNA4  | 1137 | 0.001265498 | 0.490632288  |
| 317 | CHRNA5  | 1138 | 1.05E-10    | 0.809181381  |
| 318 | CHRN3   | 1142 | 2.82E-08    | 0.732630871  |
| 319 | CHRN4   | 1143 | 2.89E-06    | 0.652753435  |
| 320 | CHRNA   | 1144 | 1.08E-08    | 0.746902653  |
| 321 | CHUK    | 1147 | 1.23E-05    | 0.622055273  |
| 322 | CIRBP   | 1153 | 0.007329731 | -0.419588467 |
| 323 | TBCB    | 1155 | 0.000703484 | -0.511375875 |
| 324 | CKM     | 1158 | 0.000103273 | 0.569603058  |
| 325 | ERCC8   | 1161 | 0.000832787 | 0.505528621  |
| 326 | AP2S1   | 1175 | 0.002721539 | -0.46163833  |
| 327 | AP3S1   | 1176 | 0.005342015 | -0.433590217 |
| 328 | CLCN3   | 1182 | 0.001905342 | -0.475337954 |
| 329 | CLCN5   | 1184 | 0.000465577 | 0.525140034  |
| 330 | CLU     | 1191 | 0.008965302 | -0.410033894 |
| 331 | CLIC1   | 1192 | 0.008416687 | -0.413046634 |
| 332 | CLK3    | 1198 | 0.000907551 | 0.502540913  |
| 333 | CLNS1A  | 1207 | 1.72E-05    | -0.614453635 |
| 334 | CLTA    | 1211 | 0.009093825 | -0.409320115 |
| 335 | CLTB    | 1212 | 1.72E-05    | 0.614401791  |
| 336 | CLTC    | 1213 | 0.003167515 | -0.455602034 |
| 337 | CCR3    | 1232 | 0.001001241 | 0.499005296  |
| 338 | CCR5    | 1234 | 0.000562229 | 0.518942708  |
| 339 | CCR8    | 1237 | 8.12E-09    | 0.75080501   |
| 340 | CCBP2   | 1238 | 1.05E-06    | 0.672185432  |
| 341 | CMKLR1  | 1240 | 1.50E-10    | 0.804490393  |
| 342 | LTB4R   | 1241 | 0.000144416 | 0.56025263   |
| 343 | CNGA1   | 1259 | 8.94E-08    | 0.714748715  |
| 344 | CNGA3   | 1261 | 8.79E-06    | 0.62955651   |
| 345 | PLK3    | 1263 | 0.002495217 | 0.465122405  |
| 346 | CNR1    | 1268 | 8.87E-07    | 0.675341208  |
| 347 | CNR2    | 1269 | 3.03E-09    | 0.764422469  |
| 348 | COL4A2  | 1284 | 1.89E-06    | 0.661180964  |
| 349 | COL4A3  | 1285 | 4.05E-07    | 0.68948394   |
| 350 | COL4A4  | 1286 | 0.009321524 | 0.408145784  |
| 351 | COL9A2  | 1298 | 8.19E-07    | 0.676873895  |
| 352 | COL11A2 | 1302 | 3.77E-11    | 0.824352009  |
| 353 | COL15A1 | 1306 | 0.000767778 | 0.508391505  |
| 354 | COMT    | 1312 | 0.002757868 | -0.461083749 |



|     |         |      |             |              |
|-----|---------|------|-------------|--------------|
| 355 | COPA    | 1314 | 0.00595928  | -0.428810288 |
| 356 | COPB1   | 1315 | 8.15E-06    | -0.63121269  |
| 357 | Unknown | 1325 | 0.000257941 | 0.543450932  |
| 358 | COX4I1  | 1327 | 0.001011716 | -0.498632517 |
| 359 | COX5B   | 1329 | 4.61E-05    | -0.590509161 |
| 360 | COX6B1  | 1340 | 0.000333676 | -0.535657688 |
| 361 | COX6C   | 1345 | 0.000913279 | -0.502317662 |
| 362 | COX7A2  | 1347 | 0.001928709 | -0.474885378 |
| 363 | COX7B   | 1349 | 0.00145813  | -0.485442881 |
| 364 | COX7C   | 1350 | 0.000171635 | -0.555353713 |
| 365 | COX8A   | 1351 | 0.00717469  | -0.420619445 |
| 366 | CPA2    | 1358 | 0.00813132  | 0.414703434  |
| 367 | CPA3    | 1359 | 2.41E-08    | 0.735160084  |
| 368 | CPB2    | 1361 | 0.000343513 | 0.534772882  |
| 369 | CPD     | 1362 | 0.00024704  | 0.544780091  |
| 370 | CPM     | 1368 | 0.000350088 | 0.534130191  |
| 371 | CPN1    | 1369 | 4.65E-09    | 0.758591977  |
| 372 | CPN2    | 1370 | 0.001372157 | 0.487704552  |
| 373 | CR1     | 1378 | 2.96E-06    | 0.652318719  |
| 374 | CR2     | 1380 | 1.98E-05    | 0.611099715  |
| 375 | CREB1   | 1385 | 0.002077367 | -0.472135185 |
| 376 | ATF2    | 1386 | 0.000343759 | -0.534738225 |
| 377 | CREBBP  | 1387 | 0.002726008 | -0.4615609   |
| 378 | CRH     | 1392 | 5.96E-05    | 0.583982092  |
| 379 | CRHBP   | 1393 | 2.92E-07    | 0.695186363  |
| 380 | CRHR2   | 1395 | 4.73E-09    | 0.758311528  |
| 381 | CRKL    | 1399 | 0.002871319 | -0.459543423 |
| 382 | CRMP1   | 1400 | 2.12E-06    | 0.658903259  |
| 383 | CRYBA4  | 1413 | 5.08E-08    | 0.723669039  |
| 384 | CRYBB1  | 1414 | 1.49E-10    | 0.804636973  |
| 385 | CRYBB3  | 1417 | 1.05E-10    | 0.809126502  |
| 386 | CRYGA   | 1418 | 5.02E-12    | 0.863225926  |
| 387 | CRYGB   | 1419 | 2.21E-10    | 0.799139391  |
| 388 | CRYGS   | 1427 | 0.00363614  | 0.449921715  |
| 389 | CS      | 1431 | 0.000582009 | -0.517830665 |
| 390 | CSF1    | 1435 | 1.11E-06    | 0.671205744  |
| 391 | CSF3R   | 1441 | 5.71E-05    | 0.585126701  |
| 392 | CSH1    | 1442 | 0.008850185 | 0.410664634  |
| 393 | CSH2    | 1443 | 1.58E-05    | 0.616304081  |
| 394 | CSHL1   | 1444 | 2.36E-07    | 0.698786154  |
| 395 | CSK     | 1445 | 4.48E-09    | 0.759158505  |
| 396 | CSN1S1  | 1446 | 3.87E-05    | 0.594899256  |
| 397 | CSN2    | 1447 | 0.001600511 | 0.481958494  |
| 398 | CSN3    | 1448 | 2.08E-08    | 0.737441574  |
| 399 | CSNK1A1 | 1452 | 0.000307041 | -0.538204966 |

|     |          |      |             |              |
|-----|----------|------|-------------|--------------|
| 400 | CSNK1D   | 1453 | 1.75E-06    | -0.662604034 |
| 401 | CSNK1G2  | 1455 | 0.00056596  | -0.518712532 |
| 402 | CSNK1G3  | 1456 | 0.002757868 | -0.461085252 |
| 403 | CSNK2A2  | 1459 | 0.003810747 | -0.44798248  |
| 404 | CSNK2B   | 1460 | 0.001591642 | -0.482158189 |
| 405 | SLC25A10 | 1468 | 0.00124594  | -0.491200962 |
| 406 | CST3     | 1471 | 0.008240788 | -0.414076581 |
| 407 | CST5     | 1473 | 1.05E-10    | 0.809093373  |
| 408 | CSTF3    | 1479 | 0.000415162 | -0.528753969 |
| 409 | CTBP1    | 1487 | 1.48E-05    | -0.61783652  |
| 410 | CTBP2    | 1488 | 7.27E-05    | -0.578856219 |
| 411 | CTLA4    | 1493 | 1.29E-09    | 0.775668474  |
| 412 | CTNNA1   | 1495 | 0.000935714 | -0.501398877 |
| 413 | CTRL     | 1506 | 7.65E-06    | 0.632627805  |
| 414 | CTSG     | 1511 | 1.30E-05    | 0.620819411  |
| 415 | CTSH     | 1512 | 0.009263577 | -0.408470025 |
| 416 | Unknown  | 1518 | 7.21E-06    | 0.633859614  |
| 417 | CTSS     | 1520 | 0.000699749 | 0.511566292  |
| 418 | CTSW     | 1521 | 3.93E-08    | 0.727591186  |
| 419 | CTSZ     | 1522 | 2.12E-10    | 0.799630425  |
| 420 | CUX1     | 1523 | 0.006750202 | -0.423360755 |
| 421 | CXADR    | 1525 | 3.32E-05    | -0.598748122 |
| 422 | TEX28    | 1527 | 5.45E-10    | 0.787121094  |
| 423 | CYBB     | 1536 | 3.82E-07    | 0.690573646  |
| 424 | CYC1     | 1537 | 0.00679483  | -0.423055853 |
| 425 | CYLC1    | 1538 | 7.52E-10    | 0.783062921  |
| 426 | CYLC2    | 1539 | 0.006127589 | 0.427601541  |
| 427 | CYP1A1   | 1543 | 5.64E-05    | 0.585421393  |
| 428 | CYP1A2   | 1544 | 7.07E-07    | 0.679489528  |
| 429 | CYP2A6   | 1548 | 9.77E-10    | 0.779484345  |
| 430 | CYP2B6   | 1555 | 2.37E-07    | 0.698734854  |
| 431 | CYP2B7P1 | 1556 | 5.99E-11    | 0.817317861  |
| 432 | CYP2C19  | 1557 | 0.000302861 | 0.538591139  |
| 433 | CYP2C9   | 1559 | 2.21E-10    | 0.799079051  |
| 434 | CYP2C18  | 1562 | 6.40E-11    | 0.81579876   |
| 435 | CYP2E1   | 1571 | 8.10E-11    | 0.812632707  |
| 436 | CYP2J2   | 1573 | 0.000830604 | 0.505623959  |
| 437 | CYP3A4   | 1576 | 2.04E-05    | 0.610401149  |
| 438 | CYP4A11  | 1579 | 6.70E-08    | 0.71928404   |
| 439 | CYP11B1  | 1584 | 1.78E-08    | 0.739778864  |
| 440 | CYP17A1  | 1586 | 7.90E-09    | 0.751214155  |
| 441 | ADAM3A   | 1587 | 2.45E-07    | 0.698140058  |
| 442 | CYP19A1  | 1588 | 0.005313175 | 0.433853334  |
| 443 | CYP21A2  | 1589 | 6.62E-10    | 0.784627723  |
| 444 | CYP27B1  | 1594 | 3.23E-08    | 0.730559621  |

|     |         |      |             |              |
|-----|---------|------|-------------|--------------|
| 445 | CYP51A1 | 1595 | 4.06E-06    | 0.645879627  |
| 446 | DAB1    | 1600 | 2.62E-11    | 0.830274482  |
| 447 | DAG1    | 1605 | 3.46E-05    | -0.59769029  |
| 448 | DGKA    | 1606 | 0.003270579 | 0.45430327   |
| 449 | DGKB    | 1607 | 0.000522448 | 0.521348058  |
| 450 | DGKG    | 1608 | 5.92E-07    | 0.682787232  |
| 451 | DGKQ    | 1609 | 0.00300601  | -0.457709549 |
| 452 | DAO     | 1610 | 0.000149577 | 0.559272403  |
| 453 | DARS    | 1615 | 0.000192192 | -0.552107655 |
| 454 | DAXX    | 1616 | 5.91E-08    | 0.72131383   |
| 455 | DBH     | 1621 | 9.25E-07    | 0.674594019  |
| 456 | DBI     | 1622 | 0.000177094 | -0.554475707 |
| 457 | DBT     | 1629 | 0.002492926 | -0.465174934 |
| 458 | DCC     | 1630 | 2.81E-05    | 0.602675431  |
| 459 | DCI     | 1632 | 0.000193715 | -0.551886931 |
| 460 | DCTD    | 1635 | 0.000105246 | -0.569041677 |
| 461 | DCT     | 1638 | 5.96E-05    | 0.583954629  |
| 462 | DDB1    | 1642 | 0.000117771 | -0.565900807 |
| 463 | AKRIC2  | 1646 | 0.005541189 | 0.432018157  |
| 464 | DDIT3   | 1649 | 0.000492234 | 0.523326984  |
| 465 | DDOST   | 1650 | 6.73E-05    | -0.580830155 |
| 466 | DDT     | 1652 | 0.004902882 | -0.437323348 |
| 467 | DDX3X   | 1654 | 0.005222912 | -0.434601408 |
| 468 | DDX5    | 1655 | 2.15E-05    | -0.609221944 |
| 469 | DDX6    | 1656 | 9.12E-06    | -0.628672072 |
| 470 | DHX8    | 1659 | 1.40E-05    | 0.619034611  |
| 471 | DDX10   | 1662 | 0.008108768 | -0.414858454 |
| 472 | DECR1   | 1666 | 0.001869953 | -0.476041938 |
| 473 | DEFB4   | 1673 | 6.02E-11    | 0.817133407  |
| 474 | DFFB    | 1677 | 0.006951253 | -0.422015406 |
| 475 | COCH    | 1690 | 2.13E-05    | 0.609423038  |
| 476 | DHCR24  | 1718 | 0.000346813 | 0.534442807  |
| 477 | LOC1720 | 1720 | 0.000406926 | 0.529385785  |
| 478 | DHODH   | 1723 | 4.03E-10    | 0.791070478  |
| 479 | DHPS    | 1725 | 0.000656845 | -0.513698932 |
| 480 | CYB5R3  | 1727 | 0.001367532 | -0.487849564 |
| 481 | DKC1    | 1736 | 0.001150844 | -0.49402888  |
| 482 | DLG2    | 1740 | 0.00193483  | 0.474770931  |
| 483 | DLX3    | 1747 | 1.19E-05    | 0.622859903  |
| 484 | DLX4    | 1748 | 5.68E-08    | 0.721929826  |
| 485 | DLX6    | 1750 | 0.000111782 | 0.567363429  |
| 486 | DNM1    | 1759 | 0.000697312 | 0.511679741  |
| 487 | DMWD    | 1762 | 2.48E-09    | 0.767005342  |
| 488 | DNAH6   | 1768 | 9.09E-08    | 0.71444975   |
| 489 | DNAH8   | 1769 | 4.83E-05    | 0.589309479  |

|     |          |      |             |              |
|-----|----------|------|-------------|--------------|
| 490 | DNASE1L1 | 1774 | 4.89E-08    | 0.724292739  |
| 491 | DNASE1L3 | 1776 | 3.22E-08    | 0.730629737  |
| 492 | DYNC1H1  | 1778 | 0.000375389 | -0.531905114 |
| 493 | DYNC1I2  | 1781 | 0.000871208 | -0.503971372 |
| 494 | DYNC1LI2 | 1783 | 0.000468739 | -0.524926662 |
| 495 | DNM2     | 1785 | 4.77E-10    | 0.788774192  |
| 496 | DOCK1    | 1793 | 0.000210867 | 0.549449464  |
| 497 | DOCK2    | 1794 | 1.07E-10    | 0.808771227  |
| 498 | DOK1     | 1796 | 0.004897427 | -0.437369327 |
| 499 | DOM3Z    | 1797 | 2.22E-05    | 0.608485506  |
| 500 | DPAGT1   | 1798 | 0.000770368 | -0.508269023 |
| 501 | DPH2     | 1802 | 0.002593196 | -0.463595424 |
| 502 | DPT      | 1805 | 0.001438898 | 0.485934917  |
| 503 | SLC26A3  | 1811 | 0.00015756  | 0.557788743  |
| 504 | DRD5     | 1816 | 5.77E-11    | 0.817967271  |
| 505 | DRG2     | 1819 | 2.55E-08    | 0.734202079  |
| 506 | DRP2     | 1821 | 4.33E-05    | 0.592101359  |
| 507 | DSC1     | 1823 | 4.31E-10    | 0.790121205  |
| 508 | RCAN1    | 1827 | 2.43E-08    | 0.734962615  |
| 509 | DSG3     | 1830 | 1.24E-10    | 0.806898433  |
| 510 | DSPP     | 1834 | 0.00037035  | -0.532311189 |
| 511 | DTX1     | 1840 | 0.000239942 | 0.545649936  |
| 512 | DUSP6    | 1848 | 0.003830033 | -0.447739654 |
| 513 | DUT      | 1854 | 0.000128429 | -0.563461692 |
| 514 | DVL1     | 1855 | 0.003829154 | -0.447754002 |
| 515 | DVL2     | 1856 | 0.001467766 | -0.485189916 |
| 516 | DYRK1A   | 1859 | 0.003506256 | -0.451456373 |
| 517 | E2F4     | 1874 | 2.00E-10    | 0.800400746  |
| 518 | E4F1     | 1877 | 0.002878508 | -0.45943939  |
| 519 | EBF1     | 1879 | 0.008158352 | 0.41454261   |
| 520 | EBI2     | 1880 | 2.35E-07    | 0.698917993  |
| 521 | ECHS1    | 1892 | 0.000192181 | -0.55211607  |
| 522 | EDA      | 1896 | 6.98E-10    | 0.783960598  |
| 523 | EDG3     | 1903 | 1.41E-07    | 0.707528879  |
| 524 | PHC2     | 1912 | 0.000837503 | -0.50533764  |
| 525 | EEF1A1   | 1915 | 0.000817421 | -0.506162522 |
| 526 | EEF1B2   | 1933 | 0.000181735 | -0.553721965 |
| 527 | EEF1D    | 1936 | 3.12E-06    | -0.651188468 |
| 528 | EEF1G    | 1937 | 0.000478177 | -0.52426636  |
| 529 | EEF2     | 1938 | 0.000136005 | -0.561913263 |
| 530 | EFNA1    | 1942 | 0.000466813 | -0.525059879 |
| 531 | EFNA3    | 1944 | 3.89E-07    | 0.690252291  |
| 532 | CELSR2   | 1952 | 0.001308557 | -0.489444316 |
| 533 | EGFR     | 1956 | 2.14E-08    | 0.736942552  |
| 534 | EIF2S1   | 1965 | 2.81E-06    | 0.6533456    |

|     |        |      |             |              |
|-----|--------|------|-------------|--------------|
| 535 | EIF2B1 | 1967 | 0.000274675 | -0.541602123 |
| 536 | EIF2S3 | 1968 | 0.002471232 | -0.465545025 |
| 537 | EPHA2  | 1969 | 0.005792765 | -0.430101594 |
| 538 | EIF4A1 | 1973 | 0.000493394 | -0.523224943 |
| 539 | EIF4A2 | 1974 | 0.000332638 | -0.535783908 |
| 540 | EIF4B  | 1975 | 0.005221335 | -0.434617796 |
| 541 | EIF4G1 | 1981 | 0.008682404 | -0.41155454  |
| 542 | EIF4G2 | 1982 | 0.00018593  | -0.55306355  |
| 543 | EIF5   | 1983 | 0.001545894 | -0.48324347  |
| 544 | ELAVL2 | 1993 | 2.46E-09    | 0.767119755  |
| 545 | ELAVL4 | 1996 | 2.83E-10    | 0.795604292  |
| 546 | ELF4   | 2000 | 0.000489711 | -0.523495396 |
| 547 | ELF5   | 2001 | 0.000111782 | 0.567365351  |
| 548 | ELK1   | 2002 | 6.61E-05    | 0.58131162   |
| 549 | MARK2  | 2011 | 0.001111577 | 0.495259945  |
| 550 | EMX1   | 2016 | 6.08E-07    | 0.682326886  |
| 551 | CTTN   | 2017 | 9.88E-05    | -0.570779205 |
| 552 | EN1    | 2019 | 5.17E-11    | 0.820026745  |
| 553 | ENSA   | 2029 | 0.000819756 | -0.506060565 |
| 554 | EP300  | 2033 | 0.000302056 | -0.538699102 |
| 555 | EPB41  | 2035 | 5.77E-05    | -0.584836277 |
| 556 | EPHA1  | 2041 | 3.13E-09    | 0.763961891  |
| 557 | EPHA7  | 2045 | 2.25E-05    | 0.608103599  |
| 558 | EPHA8  | 2046 | 1.44E-09    | 0.774313823  |
| 559 | EPHB2  | 2048 | 7.55E-09    | 0.751893578  |
| 560 | EPHX2  | 2053 | 0.001827603 | -0.476934714 |
| 561 | EPRS   | 2058 | 0.000489072 | -0.523544083 |
| 562 | EPS15  | 2060 | 0.000965556 | -0.500274893 |
| 563 | NR2F6  | 2063 | 0.005334206 | -0.433660051 |
| 564 | ERBB3  | 2065 | 0.002385194 | -0.46695668  |
| 565 | EYA4   | 2070 | 0.003403783 | 0.452649522  |
| 566 | ERCC3  | 2071 | 0.000167441 | -0.556063027 |
| 567 | ERH    | 2079 | 0.000363367 | -0.532885705 |
| 568 | ERN1   | 2081 | 2.81E-08    | 0.732717021  |
| 569 | FBL    | 2091 | 0.000683793 | -0.512343712 |
| 570 | ESR1   | 2099 | 0.000236973 | -0.54600706  |
| 571 | ESRRA  | 2101 | 1.32E-06    | 0.668011772  |
| 572 | ETF1   | 2107 | 0.001515356 | -0.483983466 |
| 573 | ETFA   | 2108 | 0.007228698 | -0.420278963 |
| 574 | ETFB   | 2109 | 0.001431666 | -0.486105101 |
| 575 | ETV1   | 2115 | 1.76E-07    | 0.703847331  |
| 576 | ETV5   | 2119 | 0.003023156 | -0.457492285 |
| 577 | ETV6   | 2120 | 0.008551076 | -0.412274007 |
| 578 | EVI2B  | 2124 | 8.31E-06    | 0.630777531  |
| 579 | EWSR1  | 2130 | 2.53E-06    | -0.655385261 |

|     |        |      |             |              |
|-----|--------|------|-------------|--------------|
| 580 | EXT2   | 2132 | 0.000611812 | -0.516161496 |
| 581 | EYA1   | 2138 | 1.11E-06    | 0.671274606  |
| 582 | EZH1   | 2145 | 1.82E-09    | 0.771106976  |
| 583 | F5     | 2153 | 0.000665078 | 0.513249782  |
| 584 | F7     | 2155 | 2.64E-10    | 0.79658778   |
| 585 | F9     | 2158 | 0.005693921 | 0.430838358  |
| 586 | F11    | 2160 | 7.76E-07    | 0.67782993   |
| 587 | F12    | 2161 | 9.83E-08    | 0.713285436  |
| 588 | F13B   | 2165 | 0.005810155 | 0.429968608  |
| 589 | FAAH   | 2166 | 0.001039742 | -0.497619572 |
| 590 | FANCC  | 2176 | 3.52E-10    | 0.792901967  |
| 591 | FANCD2 | 2177 | 0.000244368 | 0.545120882  |
| 592 | ACSL3  | 2181 | 0.001008891 | -0.498728516 |
| 593 | BPTF   | 2186 | 0.006192337 | -0.427137616 |
| 594 | FANCF  | 2188 | 0.002093429 | -0.471842627 |
| 595 | FAT    | 2195 | 0.009153005 | -0.409021109 |
| 596 | FAU    | 2197 | 4.57E-06    | -0.643431975 |
| 597 | FCAR   | 2204 | 0.003868364 | 0.447317248  |
| 598 | MS4A2  | 2206 | 0.003682828 | 0.44939199   |
| 599 | FCER1G | 2207 | 2.21E-10    | 0.79909665   |
| 600 | FCER2  | 2208 | 1.78E-06    | 0.662262381  |
| 601 | FKTN   | 2218 | 7.78E-08    | 0.716959587  |
| 602 | FDFT1  | 2222 | 0.00388335  | -0.44715339  |
| 603 | FDPS   | 2224 | 2.99E-05    | -0.601248102 |
| 604 | FECH   | 2235 | 0.008837722 | -0.410740377 |
| 605 | FGA    | 2243 | 2.02E-09    | 0.769777365  |
| 606 | FGD1   | 2245 | 5.58E-11    | 0.818349364  |
| 607 | FGF10  | 2255 | 0.000128731 | 0.563391054  |
| 608 | FGF11  | 2256 | 1.15E-05    | 0.62363084   |
| 609 | FGFR1  | 2260 | 0.005206971 | -0.434735125 |
| 610 | FGR    | 2268 | 6.54E-11    | 0.815542802  |
| 611 | FH     | 2271 | 0.000519114 | -0.52158276  |
| 612 | FIGF   | 2277 | 0.000494799 | 0.52312702   |
| 613 | FKBP1A | 2280 | 0.004471887 | -0.441191252 |
| 614 | FKBP2  | 2286 | 0.001837339 | -0.476740262 |
| 615 | FKBP3  | 2287 | 0.000361623 | -0.53307268  |
| 616 | FOXF1  | 2294 | 6.04E-09    | 0.754941979  |
| 617 | FOXF2  | 2295 | 9.07E-11    | 0.811150222  |
| 618 | FOXD4  | 2298 | 0.001264589 | 0.490665905  |
| 619 | FOXJ1  | 2299 | 0.007035297 | -0.421496307 |
| 620 | FOXO3  | 2301 | 2.28E-06    | 0.65742917   |
| 621 | FOXC2  | 2303 | 1.70E-09    | 0.772038946  |
| 622 | FOXO1  | 2308 | 5.24E-08    | 0.723180721  |
| 623 | FOXO3  | 2309 | 2.18E-05    | -0.608886415 |
| 624 | FLI1   | 2313 | 2.82E-10    | 0.795635433  |

|     |          |      |             |              |
|-----|----------|------|-------------|--------------|
| 625 | MLANA    | 2315 | 0.002914984 | 0.458932556  |
| 626 | FLNB     | 2317 | 0.000720718 | -0.510512113 |
| 627 | FLT3     | 2322 | 1.26E-08    | 0.744639438  |
| 628 | FMO2     | 2327 | 1.55E-10    | 0.804034436  |
| 629 | FMO4     | 2329 | 0.00036806  | 0.532505857  |
| 630 | AFF2     | 2334 | 8.11E-11    | 0.812597383  |
| 631 | FNTA     | 2339 | 0.000283119 | -0.540667829 |
| 632 | FOLR2    | 2350 | 0.003168789 | 0.455582734  |
| 633 | FPR1     | 2357 | 0.007129778 | 0.420917975  |
| 634 | FPRL1    | 2358 | 3.79E-08    | 0.728104367  |
| 635 | FPRL2    | 2359 | 1.05E-05    | 0.625592126  |
| 636 | FXN      | 2395 | 1.58E-05    | 0.616317391  |
| 637 | FRAP1    | 2475 | 9.48E-05    | 0.571887058  |
| 638 | FRG1     | 2483 | 0.00095474  | -0.500649274 |
| 639 | FSHR     | 2492 | 1.18E-08    | 0.745543983  |
| 640 | FUCA2    | 2519 | 0.002726579 | -0.461548356 |
| 641 | FUT2     | 2524 | 0.002997626 | -0.45781639  |
| 642 | FUT3     | 2525 | 6.12E-11    | 0.816717559  |
| 643 | FUT4     | 2526 | 7.62E-09    | 0.751752785  |
| 644 | FUT6     | 2528 | 2.26E-10    | 0.798736765  |
| 645 | FUT7     | 2529 | 0.006522621 | 0.424895058  |
| 646 | G6PC     | 2538 | 5.13E-10    | 0.787859852  |
| 647 | XRCC6    | 2547 | 2.51E-05    | -0.605517528 |
| 648 | GAB1     | 2549 | 2.68E-08    | 0.733470167  |
| 649 | GABBR1   | 2550 | 3.87E-05    | 0.594914678  |
| 650 | GABRA1   | 2554 | 5.01E-08    | 0.723872144  |
| 651 | GABRA2   | 2555 | 8.44E-08    | 0.715681871  |
| 652 | GABRA3   | 2556 | 1.72E-05    | 0.614337666  |
| 653 | GABRA4   | 2557 | 1.42E-05    | 0.618774237  |
| 654 | GABRA6   | 2559 | 1.28E-07    | 0.709047276  |
| 655 | GABRB2   | 2561 | 0.004770057 | 0.438489463  |
| 656 | GABRB3   | 2562 | 0.000229882 | 0.546912798  |
| 657 | GABRG2   | 2566 | 8.60E-05    | 0.574483307  |
| 658 | GABRG3   | 2567 | 0.001032796 | 0.497880468  |
| 659 | GABRR2   | 2570 | 0.001206418 | 0.492341406  |
| 660 | GAD1     | 2571 | 0.000108561 | 0.568203923  |
| 661 | GAD2     | 2572 | 2.14E-11    | 0.834423082  |
| 662 | GAK      | 2580 | 0.000997636 | -0.499137462 |
| 663 | GALE     | 2582 | 0.00296182  | -0.458298874 |
| 664 | B4GALNT1 | 2583 | 1.11E-05    | 0.624448523  |
| 665 | GALNS    | 2588 | 0.000815516 | 0.506260619  |
| 666 | GALNT1   | 2589 | 0.007196303 | -0.420477778 |
| 667 | GALNT2   | 2590 | 0.000636212 | -0.514775068 |
| 668 | GALNT3   | 2591 | 0.001705482 | -0.479599994 |
| 669 | GANC     | 2595 | 9.60E-11    | 0.810302391  |

|     |         |      |             |              |
|-----|---------|------|-------------|--------------|
| 670 | GAP43   | 2596 | 0.005198458 | 0.434824475  |
| 671 | LRRC32  | 2615 | 0.006102597 | -0.427770032 |
| 672 | GARS    | 2617 | 0.002045325 | -0.472710071 |
| 673 | GAS6    | 2621 | 0.00012286  | -0.564701919 |
| 674 | GAS8    | 2622 | 9.79E-07    | 0.673528053  |
| 675 | GATA4   | 2626 | 0.000278302 | 0.541198233  |
| 676 | Unknown | 2630 | 0.000227278 | -0.547255258 |
| 677 | GBAS    | 2631 | 0.000247199 | -0.544748115 |
| 678 | GBE1    | 2632 | 0.005483943 | -0.432456211 |
| 679 | GBP2    | 2634 | 0.000111782 | 0.567366446  |
| 680 | GC      | 2638 | 7.37E-09    | 0.75225001   |
| 681 | GCHFR   | 2644 | 3.30E-05    | -0.598875402 |
| 682 | NR6A1   | 2649 | 3.14E-11    | 0.826912852  |
| 683 | GDF9    | 2661 | 1.89E-11    | 0.836161962  |
| 684 | GDI2    | 2665 | 0.004355821 | -0.442316796 |
| 685 | GFAP    | 2670 | 4.04E-07    | 0.689546489  |
| 686 | GFI1    | 2672 | 1.28E-05    | 0.621153602  |
| 687 | GFRA3   | 2676 | 2.27E-10    | 0.798695072  |
| 688 | GGT1    | 2678 | 5.41E-11    | 0.819067348  |
| 689 | GGTLA1  | 2687 | 9.14E-10    | 0.780484103  |
| 690 | GH1     | 2688 | 8.49E-08    | 0.715570169  |
| 691 | GH2     | 2689 | 0.003765489 | 0.448490667  |
| 692 | GHRH    | 2691 | 2.08E-06    | 0.659314512  |
| 693 | GHRHR   | 2692 | 0.002778012 | 0.46077165   |
| 694 | GHSR    | 2693 | 6.17E-05    | 0.583049102  |
| 695 | GJB3    | 2707 | 1.69E-10    | 0.80277833   |
| 696 | GJB5    | 2709 | 0.001696546 | 0.479791145  |
| 697 | GK2     | 2712 | 5.01E-11    | 0.820442508  |
| 698 | GPC3    | 2719 | 1.45E-08    | 0.742655425  |
| 699 | GLB1    | 2720 | 0.00406501  | -0.4452437   |
| 700 | GCLC    | 2729 | 1.17E-07    | 0.710438644  |
| 701 | GLP1R   | 2740 | 6.90E-09    | 0.753137595  |
| 702 | GLRA1   | 2741 | 3.91E-05    | 0.59467194   |
| 703 | GLRA2   | 2742 | 5.59E-05    | 0.585708356  |
| 704 | GLUL    | 2752 | 0.003829154 | -0.447753118 |
| 705 | GMFB    | 2764 | 3.06E-07    | 0.694317536  |
| 706 | GML     | 2765 | 2.10E-08    | 0.737228759  |
| 707 | GNA11   | 2767 | 0.004853628 | -0.437771431 |
| 708 | GNAI2   | 2771 | 1.57E-05    | 0.616455139  |
| 709 | GNAO1   | 2775 | 7.53E-09    | 0.751949147  |
| 710 | GNAQ    | 2776 | 0.00353755  | -0.451085845 |
| 711 | GNAS    | 2778 | 0.00049332  | -0.523235115 |
| 712 | GNAT2   | 2780 | 0.004217852 | 0.443740752  |
| 713 | GNB1    | 2782 | 0.003817073 | -0.447913063 |
| 714 | GNG5    | 2787 | 0.003550186 | -0.450933933 |



|     |        |      |             |              |
|-----|--------|------|-------------|--------------|
| 715 | GNG7   | 2788 | 0.00599227  | 0.428545645  |
| 716 | GNG10  | 2790 | 0.000779761 | -0.507836114 |
| 717 | GNGT2  | 2793 | 1.55E-11    | 0.839666334  |
| 718 | GNRHR  | 2798 | 0.000761576 | 0.508705987  |
| 719 | GNS    | 2799 | 0.006529934 | -0.4248473   |
| 720 | GOLGA1 | 2800 | 7.41E-05    | 0.578351244  |
| 721 | GOLGA4 | 2803 | 1.33E-05    | -0.620326528 |
| 722 | GOLGB1 | 2804 | 0.000354403 | -0.533742264 |
| 723 | GP1BA  | 2811 | 7.28E-11    | 0.814078176  |
| 724 | GP2    | 2813 | 5.40E-07    | 0.684443759  |
| 725 | GPD2   | 2820 | 0.005922723 | -0.429076744 |
| 726 | GPI    | 2821 | 0.009050674 | -0.409555213 |
| 727 | GPR4   | 2828 | 7.93E-09    | 0.751126697  |
| 728 | XCR1   | 2829 | 0.000836015 | 0.505402056  |
| 729 | GPR6   | 2830 | 2.63E-07    | 0.696945521  |
| 730 | NPBWR2 | 2832 | 3.17E-10    | 0.794243368  |
| 731 | CXCR3  | 2833 | 2.41E-08    | 0.73510227   |
| 732 | PRLHR  | 2834 | 0.003287068 | 0.454085463  |
| 733 | GPR12  | 2835 | 0.000250719 | 0.54429203   |
| 734 | UTS2R  | 2837 | 0.008922793 | 0.410268521  |
| 735 | GPR17  | 2840 | 0.000856336 | 0.504594666  |
| 736 | GPR21  | 2844 | 0.001298663 | 0.489708072  |
| 737 | GPR26  | 2849 | 0.007491313 | 0.418546581  |
| 738 | GPER   | 2852 | 4.46E-09    | 0.75924854   |
| 739 | GPR34  | 2857 | 0.009487732 | 0.40731699   |
| 740 | MLNR   | 2862 | 0.00464007  | 0.439679312  |
| 741 | GRK4   | 2868 | 0.000114431 | 0.566707795  |
| 742 | GRK5   | 2869 | 5.18E-07    | 0.685202805  |
| 743 | GPS1   | 2873 | 2.18E-05    | -0.608900778 |
| 744 | GPX1   | 2876 | 0.000553232 | -0.519491274 |
| 745 | GPX2   | 2877 | 1.55E-05    | 0.616789039  |
| 746 | GPX4   | 2879 | 0.004387168 | -0.441998096 |
| 747 | GPX5   | 2880 | 2.40E-07    | 0.698503837  |
| 748 | GRB2   | 2885 | 2.12E-06    | -0.658960504 |
| 749 | GRB7   | 2886 | 0.00024674  | -0.544830066 |
| 750 | GRIA4  | 2893 | 0.001729077 | 0.479041299  |
| 751 | GRID1  | 2894 | 3.68E-05    | 0.596179076  |
| 752 | GRIK1  | 2897 | 1.36E-05    | 0.619766552  |
| 753 | GRIN1  | 2902 | 2.60E-09    | 0.766303877  |
| 754 | GRIN2B | 2904 | 1.68E-06    | 0.66333094   |
| 755 | GRIN2D | 2906 | 2.60E-06    | 0.654862208  |
| 756 | GRM1   | 2911 | 0.006005482 | 0.428431622  |
| 757 | GRM2   | 2912 | 4.84E-06    | 0.64224577   |
| 758 | GRM3   | 2913 | 0.00110294  | 0.495544453  |
| 759 | GRM4   | 2914 | 0.006769139 | -0.423238266 |

|     |          |      |             |              |
|-----|----------|------|-------------|--------------|
| 760 | GRM6     | 2916 | 3.23E-06    | 0.650490641  |
| 761 | GRM8     | 2918 | 2.66E-07    | 0.696765107  |
| 762 | GRPR     | 2925 | 6.40E-10    | 0.7850539    |
| 763 | GRSF1    | 2926 | 0.001756168 | -0.478445817 |
| 764 | GSK3B    | 2932 | 0.000832361 | -0.505555399 |
| 765 | GSPT1    | 2935 | 0.003494204 | -0.451593098 |
| 766 | GSS      | 2937 | 0.002279546 | -0.468588262 |
| 767 | GSTA1    | 2938 | 1.72E-09    | 0.771850618  |
| 768 | GSTM4    | 2948 | 4.41E-07    | 0.687984706  |
| 769 | GSTM5    | 2949 | 0.000655318 | 0.513801604  |
| 770 | GSTZ1    | 2954 | 0.003077205 | -0.456822455 |
| 771 | GTF2B    | 2959 | 0.00644232  | -0.425464054 |
| 772 | GTF2I    | 2969 | 0.001366877 | -0.4878702   |
| 773 | GTF3A    | 2971 | 0.000260862 | -0.543122707 |
| 774 | BRF1     | 2972 | 4.52E-10    | 0.789502795  |
| 775 | GTF3C1   | 2975 | 0.000146434 | -0.559886405 |
| 776 | GTF3C2   | 2976 | 0.000101313 | -0.570093385 |
| 777 | GUCA1A   | 2978 | 1.35E-07    | 0.708122186  |
| 778 | GUK1     | 2987 | 0.002490401 | -0.465219916 |
| 779 | GUSB     | 2990 | 1.78E-05    | -0.613635077 |
| 780 | GYPA     | 2993 | 0.000337691 | 0.535303416  |
| 781 | Unknown  | 2996 | 6.09E-05    | 0.583425183  |
| 782 | GYS1     | 2997 | 1.34E-05    | 0.62006673   |
| 783 | GYS2     | 2998 | 3.83E-09    | 0.761308071  |
| 784 | GZMM     | 3004 | 3.74E-05    | 0.595808082  |
| 785 | H1F0     | 3005 | 0.00296182  | -0.458294022 |
| 786 | HIST1H1B | 3009 | 0.000790524 | -0.507367422 |
| 787 | HIST1H1T | 3010 | 1.25E-08    | 0.744759203  |
| 788 | H3F3B    | 3021 | 6.18E-05    | -0.58302046  |
| 789 | HAGH     | 3029 | 0.005342015 | -0.433591013 |
| 790 | HADHA    | 3030 | 0.004054053 | -0.44534538  |
| 791 | HADHB    | 3032 | 8.96E-05    | -0.573410774 |
| 792 | HADH     | 3033 | 0.001643011 | -0.480981199 |
| 793 | HARS     | 3035 | 0.007405783 | -0.419086381 |
| 794 | HBBP1    | 3044 | 2.46E-05    | 0.605913698  |
| 795 | HBE1     | 3046 | 3.28E-07    | 0.693128964  |
| 796 | HCCS     | 3052 | 0.008967197 | -0.410016925 |
| 797 | SERPIND1 | 3053 | 1.00E-05    | 0.626595876  |
| 798 | HCFC1    | 3054 | 4.07E-06    | 0.645834502  |
| 799 | HCRT     | 3060 | 1.15E-11    | 0.849299181  |
| 800 | HD       | 3064 | 6.32E-08    | 0.720170616  |
| 801 | HDAC1    | 3065 | 7.24E-05    | -0.578970485 |
| 802 | HDAC2    | 3066 | 0.000530483 | -0.520832515 |
| 803 | HDLBP    | 3069 | 2.31E-05    | -0.60752175  |
| 804 | NCKAP1L  | 3071 | 0.009760681 | 0.40597074   |

|     |           |      |             |              |
|-----|-----------|------|-------------|--------------|
| 805 | HEXA      | 3073 | 6.32E-05    | -0.582474069 |
| 806 | HEXB      | 3074 | 0.003235442 | -0.454742893 |
| 807 | HFE       | 3077 | 9.12E-10    | 0.780522679  |
| 808 | HIP1      | 3092 | 0.000440843 | -0.526818732 |
| 809 | HINT1     | 3094 | 0.0059645   | -0.428746108 |
| 810 | HK1       | 3098 | 0.003109391 | -0.45638809  |
| 811 | HLA-DPB2  | 3116 | 1.11E-08    | 0.746443741  |
| 812 | HLCS      | 3141 | 0.008823245 | -0.410841149 |
| 813 | HMBS      | 3145 | 0.000439499 | 0.526939593  |
| 814 | HMGB1     | 3146 | 3.42E-05    | -0.598023418 |
| 815 | HMGB2     | 3148 | 0.007298638 | -0.419783502 |
| 816 | HMGN1     | 3150 | 7.13E-05    | -0.579344803 |
| 817 | HMGN2     | 3151 | 0.001942179 | -0.474625138 |
| 818 | HMGCL     | 3155 | 1.55E-06    | 0.664965723  |
| 819 | HMGCS1    | 3157 | 0.008358249 | -0.41339746  |
| 820 | HMGCS2    | 3158 | 2.79E-10    | 0.795826248  |
| 821 | HMOX1     | 3162 | 0.000185565 | 0.553126294  |
| 822 | HMOX2     | 3163 | 0.000281421 | 0.540864844  |
| 823 | HMX2      | 3167 | 0.002817435 | 0.460258689  |
| 824 | HNF4A     | 3172 | 2.05E-08    | 0.737634943  |
| 825 | SLC29A2   | 3177 | 0.003347379 | 0.453329026  |
| 826 | HNRNPA1   | 3178 | 0.00069653  | -0.511718309 |
| 827 | HNRNPA2B1 | 3181 | 2.54E-05    | -0.605138799 |
| 828 | HNRPAB    | 3182 | 0.002861602 | -0.459667885 |
| 829 | HNRNPC    | 3183 | 0.000592384 | -0.517247678 |
| 830 | HNRPD     | 3184 | 6.44E-05    | -0.58196295  |
| 831 | HNRPH1    | 3187 | 0.00044058  | -0.526847319 |
| 832 | HNRPH3    | 3189 | 1.44E-05    | -0.618485957 |
| 833 | HNRPK     | 3190 | 0.000141402 | -0.560842668 |
| 834 | TLX1      | 3195 | 0.009692888 | 0.406316856  |
| 835 | HOXA1     | 3198 | 5.06E-05    | 0.588173865  |
| 836 | HOXA2     | 3199 | 0.001839404 | 0.476687266  |
| 837 | HOXA6     | 3203 | 1.87E-07    | 0.702769381  |
| 838 | HOXA11    | 3207 | 0.0074727   | 0.418676542  |
| 839 | HOXB1     | 3211 | 1.44E-09    | 0.774287145  |
| 840 | HOXB3     | 3213 | 0.0097492   | -0.406033297 |
| 841 | HOXC9     | 3225 | 0.001575936 | 0.48250799   |
| 842 | HOXC10    | 3226 | 9.69E-07    | 0.673709797  |
| 843 | HOXC11    | 3227 | 2.05E-09    | 0.769469198  |
| 844 | HOXC12    | 3228 | 6.31E-08    | 0.720230775  |
| 845 | HOXD9     | 3235 | 3.22E-06    | 0.65058622   |
| 846 | HOXD13    | 3239 | 6.83E-09    | 0.753283713  |
| 847 | HPD       | 3242 | 4.54E-09    | 0.758991985  |
| 848 | HPX       | 3263 | 0.001764567 | 0.478258571  |
| 849 | HRAS      | 3265 | 0.008631659 | -0.41184242  |

|     |          |      |             |              |
|-----|----------|------|-------------|--------------|
| 850 | HRBL     | 3268 | 6.19E-06    | 0.63712199   |
| 851 | HRG      | 3273 | 0.0059645   | 0.428753975  |
| 852 | HRH2     | 3274 | 0.000129058 | 0.563315652  |
| 853 | HSD3B2   | 3284 | 4.01E-07    | 0.689683022  |
| 854 | HSD17B4  | 3295 | 0.00061782  | -0.515809443 |
| 855 | HSF1     | 3297 | 0.005429978 | -0.432875394 |
| 856 | HSF2     | 3298 | 0.002766018 | -0.460962303 |
| 857 | DNAJA1   | 3301 | 0.00296182  | -0.458297216 |
| 858 | HSPA1L   | 3305 | 2.21E-08    | 0.736389018  |
| 859 | HSPA4    | 3308 | 0.001261475 | -0.490759485 |
| 860 | HSPA5    | 3309 | 0.007979892 | -0.415628874 |
| 861 | HSPA8    | 3312 | 0.001329614 | -0.488887849 |
| 862 | HSPA9    | 3313 | 0.005212957 | -0.434682257 |
| 863 | HSPB1    | 3315 | 0.006631863 | -0.424154322 |
| 864 | HSP90AA1 | 3320 | 0.002108035 | -0.471578865 |
| 865 | HSPD1    | 3329 | 0.001267881 | -0.490568095 |
| 866 | HSPE1    | 3336 | 0.008165118 | -0.414499852 |
| 867 | NDST1    | 3340 | 0.000153648 | 0.558509799  |
| 868 | HTN1     | 3346 | 2.34E-05    | 0.607142211  |
| 869 | HTN3     | 3347 | 0.001235976 | 0.491517908  |
| 870 | HTR1A    | 3350 | 3.77E-11    | 0.824251294  |
| 871 | HTR1B    | 3351 | 1.87E-10    | 0.801315063  |
| 872 | HTR1F    | 3355 | 0.00095385  | 0.500685372  |
| 873 | HTR2B    | 3357 | 3.57E-05    | 0.596903685  |
| 874 | HTR5A    | 3361 | 0.000969822 | 0.500101734  |
| 875 | HUS1     | 3364 | 5.99E-11    | 0.817416157  |
| 876 | IAPP     | 3375 | 1.71E-07    | 0.704321642  |
| 877 | IARS     | 3376 | 6.47E-05    | -0.581866267 |
| 878 | ICA1     | 3382 | 1.76E-07    | 0.703856725  |
| 879 | IRF8     | 3394 | 7.84E-08    | 0.716827457  |
| 880 | ICT1     | 3396 | 0.00076564  | -0.508514371 |
| 881 | ID4      | 3400 | 0.001989053 | -0.47374426  |
| 882 | IDE      | 3416 | 0.002482008 | 0.465355198  |
| 883 | IFI16    | 3428 | 0.004807283 | -0.438184932 |
| 884 | IFNA1    | 3439 | 9.49E-05    | 0.571838609  |
| 885 | IFNA2    | 3440 | 7.05E-07    | 0.679561564  |
| 886 | IFNA4    | 3441 | 0.005450664 | 0.432708221  |
| 887 | IFNA5    | 3442 | 0.003039063 | 0.457295442  |
| 888 | IFNA10   | 3446 | 4.32E-06    | 0.644555609  |
| 889 | IFNA14   | 3448 | 2.11E-08    | 0.737184211  |
| 890 | IFNA16   | 3449 | 0.00166612  | 0.48046121   |
| 891 | IFNA17   | 3451 | 2.63E-07    | 0.696915807  |
| 892 | IFNA21   | 3452 | 3.38E-06    | 0.649584917  |
| 893 | IFNAR2   | 3455 | 0.002029749 | -0.472983129 |
| 894 | IFNB1    | 3456 | 4.10E-09    | 0.760351633  |

|     |         |      |             |              |
|-----|---------|------|-------------|--------------|
| 895 | IFNG    | 3458 | 3.58E-05    | 0.596843166  |
| 896 | IFNGR1  | 3459 | 0.005858996 | -0.429576969 |
| 897 | IFRD1   | 3475 | 0.009141092 | -0.409083168 |
| 898 | IGBP1   | 3476 | 0.005838584 | -0.429738954 |
| 899 | IGF1R   | 3480 | 0.007689475 | -0.417314894 |
| 900 | IGFBP7  | 3490 | 0.009820222 | -0.405670272 |
| 901 | Unknown | 3495 | 5.31E-11    | 0.819404153  |
| 902 | Unknown | 3497 | 3.44E-06    | 0.649229494  |
| 903 | IGJ     | 3512 | 0.002753563 | 0.461164664  |
| 904 | IGSF1   | 3547 | 1.91E-10    | 0.801035202  |
| 905 | IHH     | 3549 | 4.76E-10    | 0.788836478  |
| 906 | IK      | 3550 | 0.000942052 | -0.5011212   |
| 907 | IKBKB   | 3551 | 0.008539672 | -0.412336872 |
| 908 | IL1B    | 3553 | 2.12E-05    | 0.609596314  |
| 909 | IL1R1   | 3554 | 0.002894431 | -0.459212737 |
| 910 | IL2RA   | 3559 | 1.55E-10    | 0.804098449  |
| 911 | IL2RB   | 3560 | 2.26E-10    | 0.798763097  |
| 912 | IL2RG   | 3561 | 3.49E-10    | 0.793004243  |
| 913 | IL3RA   | 3563 | 7.65E-06    | 0.632624199  |
| 914 | IL4     | 3565 | 1.60E-09    | 0.772837565  |
| 915 | IL5RA   | 3568 | 8.77E-07    | 0.675561557  |
| 916 | IL9     | 3578 | 4.63E-06    | 0.643169267  |
| 917 | IL9R    | 3581 | 3.80E-10    | 0.791842993  |
| 918 | IL10RB  | 3588 | 0.001767698 | -0.478190262 |
| 919 | IL11    | 3589 | 5.28E-11    | 0.819522123  |
| 920 | IL12B   | 3593 | 0.006504632 | 0.425026646  |
| 921 | IL13RA1 | 3597 | 0.001815227 | 0.477199136  |
| 922 | IL15RA  | 3601 | 1.54E-10    | 0.80416129   |
| 923 | IL16    | 3603 | 4.98E-10    | 0.788285135  |
| 924 | IL17A   | 3605 | 2.63E-05    | 0.604361969  |
| 925 | FO XK2  | 3607 | 0.001060275 | -0.496927349 |
| 926 | ILF3    | 3609 | 0.00300252  | -0.457754901 |
| 927 | ILK     | 3611 | 0.002849911 | -0.459824043 |
| 928 | IMPA1   | 3612 | 0.006004879 | -0.428440608 |
| 929 | IMPDH2  | 3615 | 0.000250585 | -0.544312191 |
| 930 | IMPG1   | 3617 | 0.000276551 | 0.541384068  |
| 931 | ING2    | 3622 | 0.007216178 | -0.420356071 |
| 932 | INHBC   | 3626 | 2.78E-05    | 0.602979348  |
| 933 | INPPL1  | 3636 | 0.000107137 | -0.568572857 |
| 934 | INSM1   | 3642 | 0.000340192 | 0.535072918  |
| 935 | EIF3E   | 3646 | 0.002623167 | -0.46312539  |
| 936 | PDX1    | 3651 | 1.25E-05    | 0.621628961  |
| 937 | IRAK1   | 3654 | 0.004215279 | -0.443779968 |
| 938 | ITGA6   | 3655 | 0.007408351 | -0.419067809 |
| 939 | IREB2   | 3658 | 0.00134504  | -0.488487443 |

|     |         |      |             |              |
|-----|---------|------|-------------|--------------|
| 940 | IRF2    | 3660 | 0.002438934 | -0.46605455  |
| 941 | IRF3    | 3661 | 0.000319963 | -0.536967886 |
| 942 | IRF5    | 3663 | 3.86E-09    | 0.761204592  |
| 943 | IRF7    | 3665 | 0.004909552 | -0.437257818 |
| 944 | ITGAD   | 3681 | 5.47E-06    | 0.639724353  |
| 945 | ITGAE   | 3682 | 0.001471151 | -0.485094702 |
| 946 | ITGAM   | 3684 | 0.001946647 | 0.474539071  |
| 947 | ITGAX   | 3687 | 1.44E-10    | 0.805075808  |
| 948 | EIF6    | 3692 | 0.001199381 | -0.492567546 |
| 949 | ITGB5   | 3693 | 0.000565282 | -0.518752691 |
| 950 | ITIH2   | 3698 | 2.18E-08    | 0.736648226  |
| 951 | ITK     | 3702 | 3.06E-05    | 0.600719845  |
| 952 | STT3A   | 3703 | 1.12E-10    | 0.808274257  |
| 953 | ITPA    | 3704 | 1.46E-05    | -0.618093358 |
| 954 | ITPK1   | 3705 | 0.0009278   | -0.50170597  |
| 955 | ITPR2   | 3709 | 0.008108768 | 0.414861583  |
| 956 | ITPR3   | 3710 | 0.00135838  | -0.488096662 |
| 957 | IVL     | 3713 | 1.30E-11    | 0.846705244  |
| 958 | JAG2    | 3714 | 0.007868522 | -0.416290469 |
| 959 | JUND    | 3727 | 0.000936858 | -0.501334691 |
| 960 | JUP     | 3728 | 0.000914347 | -0.502275145 |
| 961 | KARS    | 3735 | 0.000806926 | -0.506684455 |
| 962 | KCNA5   | 3741 | 7.15E-11    | 0.814260554  |
| 963 | KCNA6   | 3742 | 0.001364852 | 0.487922331  |
| 964 | KCNB1   | 3745 | 0.001067631 | 0.496677651  |
| 965 | KCNG1   | 3755 | 0.004950862 | 0.436878272  |
| 966 | KCNH1   | 3756 | 0.005158247 | -0.43513926  |
| 967 | KCNJ1   | 3758 | 8.26E-11    | 0.812174282  |
| 968 | KCNJ3   | 3760 | 7.01E-09    | 0.752925727  |
| 969 | KCNJ9   | 3765 | 3.76E-07    | 0.690877152  |
| 970 | KCNJ11  | 3767 | 5.72E-10    | 0.786427615  |
| 971 | KCNJ13  | 3769 | 1.71E-05    | 0.614517769  |
| 972 | KCNJ15  | 3772 | 1.13E-11    | 0.853544555  |
| 973 | KCNK2   | 3776 | 8.97E-10    | 0.780766523  |
| 974 | KCNK3   | 3777 | 0.001982804 | 0.473871149  |
| 975 | KCNMB1  | 3779 | 7.48E-11    | 0.813744804  |
| 976 | KCNN1   | 3780 | 2.61E-07    | 0.697088631  |
| 977 | KCNQ3   | 3786 | 1.12E-06    | 0.671012952  |
| 978 | KCNS1   | 3787 | 0.000236794 | 0.546038951  |
| 979 | KCNS2   | 3788 | 7.88E-05    | 0.576788306  |
| 980 | KEL     | 3792 | 4.47E-11    | 0.821708598  |
| 981 | KHK     | 3795 | 0.001351061 | 0.488325021  |
| 982 | KIF3C   | 3797 | 0.000444857 | 0.526542433  |
| 983 | KIF5A   | 3798 | 5.86E-09    | 0.75533187   |
| 984 | KIR2DL1 | 3802 | 5.83E-09    | 0.755459427  |

|      |          |      |             |              |
|------|----------|------|-------------|--------------|
| 985  | Unknown  | 3803 | 1.60E-10    | 0.803579986  |
| 986  | Unknown  | 3804 | 2.35E-07    | 0.698864506  |
| 987  | KIR2DL4  | 3805 | 0.000823421 | 0.505916601  |
| 988  | Unknown  | 3806 | 0.000122256 | 0.564836113  |
| 989  | Unknown  | 3808 | 6.85E-05    | 0.580410302  |
| 990  | KIR2DS4  | 3809 | 3.95E-07    | 0.689977251  |
| 991  | Unknown  | 3810 | 1.13E-05    | 0.623993979  |
| 992  | KIR3DL1  | 3811 | 1.11E-07    | 0.711237441  |
| 993  | KLK2     | 3817 | 2.79E-11    | 0.829020392  |
| 994  | KLRB1    | 3820 | 0.000289962 | 0.539957451  |
| 995  | KLRD1    | 3824 | 0.000214526 | 0.548947642  |
| 996  | KNG1     | 3827 | 1.20E-08    | 0.745379354  |
| 997  | KLC1     | 3831 | 1.26E-05    | -0.621506865 |
| 998  | KIFC1    | 3833 | 0.001673595 | 0.480273186  |
| 999  | KIF25    | 3834 | 2.31E-08    | 0.735772944  |
| 1000 | KIF22    | 3835 | 0.008348424 | -0.41345923  |
| 1001 | KPNB1    | 3837 | 0.000212178 | -0.549282686 |
| 1002 | TNPO1    | 3842 | 0.007930866 | -0.415910598 |
| 1003 | RANBP5   | 3843 | 0.0003419   | -0.534906697 |
| 1004 | KRTAP5-9 | 3846 | 0.000337742 | 0.535293185  |
| 1005 | KRT1     | 3848 | 0.000843574 | 0.505088116  |
| 1006 | KRT2     | 3849 | 1.80E-07    | 0.703431478  |
| 1007 | Unknown  | 3854 | 1.33E-11    | 0.843152856  |
| 1008 | KRT8     | 3856 | 0.002733455 | -0.461449772 |
| 1009 | KRT10    | 3858 | 0.000283567 | -0.540613455 |
| 1010 | KRT12    | 3859 | 0.00013352  | 0.562403188  |
| 1011 | KRT18    | 3875 | 0.001851349 | -0.476433429 |
| 1012 | KRT19    | 3880 | 0.005135732 | -0.435321283 |
| 1013 | KRT33A   | 3883 | 0.001109313 | 0.495339255  |
| 1014 | KRT33B   | 3884 | 6.11E-05    | 0.583324038  |
| 1015 | KRT34    | 3885 | 2.46E-08    | 0.734731382  |
| 1016 | KRT81    | 3887 | 8.96E-06    | 0.629089634  |
| 1017 | KRT82    | 3888 | 0.003658827 | 0.449654533  |
| 1018 | KRT83    | 3889 | 7.35E-10    | 0.78334311   |
| 1019 | KRT85    | 3891 | 2.85E-06    | 0.653075374  |
| 1020 | LAG3     | 3902 | 0.004623246 | 0.439837602  |
| 1021 | LALBA    | 3906 | 3.21E-08    | 0.730678296  |
| 1022 | LAMA5    | 3911 | 0.005156979 | -0.435153568 |
| 1023 | LAMB2    | 3913 | 0.001028394 | -0.498050254 |
| 1024 | LAMP1    | 3916 | 0.000711138 | -0.51098525  |
| 1025 | RPSA     | 3921 | 2.37E-07    | -0.698720245 |
| 1026 | LASP1    | 3927 | 0.002784826 | -0.460682764 |
| 1027 | LCP1     | 3936 | 5.02E-12    | 0.863895447  |
| 1028 | LCP2     | 3937 | 7.91E-06    | 0.631884481  |
| 1029 | LDHC     | 3948 | 3.66E-08    | 0.728634635  |

|      |          |      |             |              |
|------|----------|------|-------------|--------------|
| 1030 | LECT2    | 3950 | 4.01E-05    | 0.594068439  |
| 1031 | LEP      | 3952 | 0.00800038  | 0.415513289  |
| 1032 | LGALS3BP | 3959 | 3.18E-06    | -0.650822974 |
| 1033 | LIG4     | 3981 | 0.002398314 | -0.466718472 |
| 1034 | ABLIM1   | 3983 | 0.000560248 | -0.519055191 |
| 1035 | LIMK1    | 3984 | 6.65E-05    | 0.581142508  |
| 1036 | LIMK2    | 3985 | 0.003716709 | -0.449013028 |
| 1037 | LIPC     | 3990 | 1.86E-05    | 0.612633639  |
| 1038 | LLGL2    | 3993 | 0.000481956 | -0.523991628 |
| 1039 | LLGL1    | 3996 | 9.55E-05    | 0.571661869  |
| 1040 | LMAN1    | 3998 | 0.001739963 | -0.478805761 |
| 1041 | LMX1B    | 4010 | 7.11E-06    | 0.634140245  |
| 1042 | LOR      | 4014 | 1.05E-10    | 0.809007944  |
| 1043 | LPA      | 4018 | 0.000186549 | 0.552972308  |
| 1044 | LPO      | 4025 | 0.004217852 | 0.44374279   |
| 1045 | LRMP     | 4033 | 2.02E-10    | 0.800284676  |
| 1046 | LRCH4    | 4034 | 0.008373334 | -0.413313599 |
| 1047 | LRP1     | 4035 | 7.82E-10    | 0.78253093   |
| 1048 | LRPAP1   | 4043 | 0.000288595 | -0.540100743 |
| 1049 | LSS      | 4047 | 0.00210099  | -0.471711146 |
| 1050 | LTBP2    | 4053 | 0.000147967 | 0.559581484  |
| 1051 | LTBP3    | 4054 | 0.000160107 | -0.557333978 |
| 1052 | LY6E     | 4061 | 0.009400202 | -0.407748035 |
| 1053 | CD180    | 4064 | 3.66E-09    | 0.76196571   |
| 1054 | LYL1     | 4066 | 0.000518216 | 0.521637683  |
| 1055 | SH2D1A   | 4068 | 1.44E-07    | 0.707139214  |
| 1056 | MAB21L1  | 4081 | 1.33E-06    | 0.667922623  |
| 1057 | MXD1     | 4084 | 5.50E-08    | 0.722419631  |
| 1058 | SMAD1    | 4086 | 0.001534774 | -0.483534328 |
| 1059 | SMAD2    | 4087 | 0.002891259 | -0.459261089 |
| 1060 | SMAD4    | 4089 | 0.004964826 | -0.436753201 |
| 1061 | SMAD6    | 4091 | 0.006655549 | -0.423992583 |
| 1062 | SMAD7    | 4092 | 0.004569283 | -0.440316273 |
| 1063 | Unknown  | 4099 | 0.000361663 | 0.533062328  |
| 1064 | MAGEA10  | 4109 | 3.84E-06    | 0.64704268   |
| 1065 | MAGEB2   | 4113 | 3.67E-07    | 0.691300818  |
| 1066 | MAN2C1   | 4123 | 9.68E-10    | 0.779647571  |
| 1067 | MANBA    | 4126 | 1.48E-05    | -0.617807484 |
| 1068 | MAP2     | 4133 | 0.000492234 | 0.523331029  |
| 1069 | MAP6     | 4135 | 0.00724622  | 0.42014941   |
| 1070 | MAS1     | 4142 | 6.40E-10    | 0.785066758  |
| 1071 | MAT1A    | 4143 | 1.69E-10    | 0.802715277  |
| 1072 | MAT2A    | 4144 | 8.60E-06    | -0.630055027 |
| 1073 | MATN1    | 4146 | 0.003035469 | 0.457346984  |
| 1074 | MAX      | 4149 | 0.003421181 | -0.452439245 |



|      |         |      |             |              |
|------|---------|------|-------------|--------------|
| 1075 | MAZ     | 4150 | 0.007993745 | 0.415555998  |
| 1076 | MBD1    | 4152 | 0.00722909  | -0.420271404 |
| 1077 | MBNL1   | 4154 | 0.005841981 | -0.429701502 |
| 1078 | MC1R    | 4157 | 0.003713618 | 0.449050165  |
| 1079 | MC2R    | 4158 | 1.99E-10    | 0.800495214  |
| 1080 | MC5R    | 4161 | 1.91E-07    | 0.702463971  |
| 1081 | MCF2    | 4168 | 9.22E-10    | 0.78035259   |
| 1082 | MCL1    | 4170 | 0.000318174 | -0.537135304 |
| 1083 | CD46    | 4179 | 0.000350256 | -0.534098912 |
| 1084 | SMCP    | 4184 | 4.02E-11    | 0.823270079  |
| 1085 | MDFI    | 4188 | 7.99E-09    | 0.751012233  |
| 1086 | MDH2    | 4191 | 3.01E-05    | -0.601122497 |
| 1087 | ME2     | 4200 | 1.17E-07    | 0.710467298  |
| 1088 | MEIS1   | 4211 | 0.001024216 | -0.498191105 |
| 1089 | MAP3K3  | 4215 | 0.001298663 | -0.489711922 |
| 1090 | MAP3K4  | 4216 | 0.009386992 | -0.407815251 |
| 1091 | MEN1    | 4221 | 0.008829656 | 0.410802138  |
| 1092 | MEP1A   | 4224 | 1.15E-08    | 0.745990767  |
| 1093 | MGAT1   | 4245 | 0.000408823 | 0.529227274  |
| 1094 | MGAT2   | 4247 | 0.000273936 | 0.541679772  |
| 1095 | MGAT5   | 4249 | 1.30E-05    | 0.620869205  |
| 1096 | MGST2   | 4258 | 0.000345795 | -0.534550577 |
| 1097 | CIITA   | 4261 | 2.61E-07    | 0.697108089  |
| 1098 | CD99    | 4267 | 0.001865375 | -0.476132662 |
| 1099 | MIF     | 4282 | 9.13E-05    | -0.572872    |
| 1100 | ATXN3   | 4287 | 5.58E-06    | 0.63928836   |
| 1101 | MLH1    | 4292 | 4.05E-06    | -0.64593083  |
| 1102 | MAP3K9  | 4293 | 1.54E-09    | 0.773371143  |
| 1103 | MLN     | 4295 | 0.002570988 | 0.463945667  |
| 1104 | AFF1    | 4299 | 0.00145813  | -0.485443766 |
| 1105 | MLLT6   | 4302 | 0.005960541 | -0.428797127 |
| 1106 | MMP19   | 4327 | 8.07E-11    | 0.812690942  |
| 1107 | ALDH6A1 | 4329 | 1.48E-06    | 0.665818947  |
| 1108 | MNAT1   | 4331 | 1.28E-10    | 0.806410505  |
| 1109 | MNT     | 4335 | 0.002651975 | -0.462690464 |
| 1110 | MOCS1   | 4337 | 0.008453788 | -0.412811985 |
| 1111 | MOCS2   | 4338 | 0.0017965   | 0.477579196  |
| 1112 | MOS     | 4342 | 1.66E-10    | 0.802979379  |
| 1113 | MOV10   | 4343 | 0.002750791 | -0.461204344 |
| 1114 | MPG     | 4350 | 0.006477599 | -0.425220474 |
| 1115 | MPI     | 4351 | 0.001021459 | -0.498290119 |
| 1116 | MPL     | 4352 | 4.40E-07    | 0.688040536  |
| 1117 | MPP1    | 4354 | 0.000444707 | 0.526563833  |
| 1118 | MPP2    | 4355 | 3.02E-10    | 0.794857111  |
| 1119 | MPST    | 4357 | 0.008127391 | -0.414732643 |

|      |         |      |             |              |
|------|---------|------|-------------|--------------|
| 1120 | MPV17   | 4358 | 1.45E-09    | 0.774142948  |
| 1121 | MPZ     | 4359 | 1.93E-10    | 0.800868127  |
| 1122 | ABCC1   | 4363 | 0.009815317 | -0.40571071  |
| 1123 | MSN     | 4478 | 0.002882885 | -0.459371174 |
| 1124 | MSR1    | 4481 | 8.26E-11    | 0.812198301  |
| 1125 | MSRA    | 4482 | 1.12E-08    | 0.746259516  |
| 1126 | MT1G    | 4495 | 0.006149948 | 0.427433044  |
| 1127 | MTAP    | 4507 | 0.007283611 | -0.419878501 |
| 1128 | Unknown | 4512 | 0.008145645 | -0.414619086 |
| 1129 | Unknown | 4513 | 0.001043045 | -0.497505931 |
| 1130 | Unknown | 4514 | 0.007511447 | -0.418411519 |
| 1131 | MTHFR   | 4524 | 2.55E-08    | 0.734192646  |
| 1132 | MTIF2   | 4528 | 0.000302861 | -0.538591054 |
| 1133 | MTM1    | 4534 | 4.98E-09    | 0.757568163  |
| 1134 | MTRR    | 4552 | 0.000288867 | -0.540064557 |
| 1135 | MUC3A   | 4584 | 1.78E-05    | 0.613669052  |
| 1136 | MUC5AC  | 4586 | 1.31E-09    | 0.775508929  |
| 1137 | MUC7    | 4589 | 9.53E-05    | 0.571734543  |
| 1138 | MUC8    | 4590 | 2.75E-07    | 0.696196733  |
| 1139 | TRIM37  | 4591 | 0.002548866 | -0.464291596 |
| 1140 | MUSK    | 4593 | 7.35E-10    | 0.783323748  |
| 1141 | MUT     | 4594 | 0.002685526 | -0.462189485 |
| 1142 | MUTYH   | 4595 | 4.08E-05    | 0.59358926   |
| 1143 | MYBPC1  | 4604 | 8.07E-06    | 0.631420932  |
| 1144 | MYF6    | 4618 | 2.31E-11    | 0.832498212  |
| 1145 | Unknown | 4620 | 4.81E-05    | 0.589442227  |
| 1146 | Unknown | 4622 | 5.15E-08    | 0.723446414  |
| 1147 | Unknown | 4626 | 1.03E-09    | 0.778800211  |
| 1148 | MYL1    | 4632 | 5.14E-06    | 0.641015229  |
| 1149 | MYL5    | 4636 | 5.05E-10    | 0.788114422  |
| 1150 | MYL6    | 4637 | 0.001194678 | -0.492700335 |
| 1151 | MYO1A   | 4640 | 3.51E-09    | 0.762466877  |
| 1152 | Unknown | 4645 | 0.001665938 | -0.480470249 |
| 1153 | MYO6    | 4646 | 0.005650141 | -0.431209862 |
| 1154 | MYO7A   | 4647 | 2.41E-05    | 0.606473378  |
| 1155 | MYOC    | 4653 | 1.92E-08    | 0.738603953  |
| 1156 | MYOG    | 4656 | 3.35E-09    | 0.763092997  |
| 1157 | MYT1    | 4661 | 5.69E-07    | 0.683535529  |
| 1158 | NAB1    | 4664 | 0.001780588 | -0.477916733 |
| 1159 | NACA    | 4666 | 3.89E-05    | -0.594792793 |
| 1160 | NAGA    | 4668 | 3.96E-06    | 0.646392544  |
| 1161 | NAGLU   | 4669 | 0.005681241 | -0.430942432 |
| 1162 | HNRPM   | 4670 | 0.000453294 | -0.525958813 |
| 1163 | NAP1L1  | 4673 | 0.00782823  | -0.416516217 |
| 1164 | NARS    | 4677 | 8.74E-05    | -0.574015523 |

|      |         |      |             |              |
|------|---------|------|-------------|--------------|
| 1165 | NCAM2   | 4685 | 1.03E-05    | 0.625960585  |
| 1166 | NCF4    | 4689 | 1.12E-08    | 0.746324799  |
| 1167 | NCL     | 4691 | 0.000267898 | -0.542326234 |
| 1168 | NDUFA1  | 4694 | 0.000119382 | -0.565510133 |
| 1169 | NDUFA2  | 4695 | 0.000242191 | -0.545374668 |
| 1170 | NDUFA3  | 4696 | 0.007243511 | -0.420174187 |
| 1171 | NDUFA4  | 4697 | 0.000617806 | -0.515816    |
| 1172 | NDUFA5  | 4698 | 0.001394714 | -0.487079863 |
| 1173 | NDUFA6  | 4700 | 0.000525614 | -0.521149241 |
| 1174 | NEB     | 4703 | 1.58E-06    | 0.664572587  |
| 1175 | NDUFAB1 | 4706 | 3.73E-05    | -0.595842672 |
| 1176 | NDUFB2  | 4708 | 0.00093832  | -0.501275088 |
| 1177 | NDUFB3  | 4709 | 0.000486094 | -0.523733644 |
| 1178 | NDUFB4  | 4710 | 0.000185481 | -0.553150288 |
| 1179 | NDUFB5  | 4711 | 0.006642158 | -0.424079665 |
| 1180 | NDUFB7  | 4713 | 0.006660625 | -0.423947936 |
| 1181 | NDUFB10 | 4716 | 0.000594691 | -0.517106652 |
| 1182 | NDUFC1  | 4717 | 5.29E-05    | -0.587082735 |
| 1183 | NDUFC2  | 4718 | 0.001486691 | -0.484683909 |
| 1184 | NDUFS2  | 4720 | 0.000817078 | -0.506180753 |
| 1185 | NDUFS3  | 4722 | 3.27E-06    | -0.650241997 |
| 1186 | NDUFV1  | 4723 | 4.16E-06    | -0.645347566 |
| 1187 | NDUFS6  | 4726 | 0.00122958  | -0.491690876 |
| 1188 | NDUFS8  | 4728 | 0.001295397 | -0.489809115 |
| 1189 | NDUFV2  | 4729 | 0.000106819 | -0.568668041 |
| 1190 | DRG1    | 4733 | 3.23E-05    | -0.599420007 |
| 1191 | 2-Sep   | 4735 | 0.009742754 | -0.406067106 |
| 1192 | RPL10A  | 4736 | 4.34E-06    | -0.644465171 |
| 1193 | NEFM    | 4741 | 4.12E-05    | 0.593337526  |
| 1194 | NEFL    | 4747 | 2.28E-07    | 0.699384202  |
| 1195 | NEO1    | 4756 | 0.001914058 | -0.475167164 |
| 1196 | NEU2    | 4759 | 0.003644233 | 0.44982739   |
| 1197 | NEUROD1 | 4760 | 0.000616658 | 0.515906133  |
| 1198 | NEUROD2 | 4761 | 1.62E-10    | 0.803397452  |
| 1199 | NEUROG1 | 4762 | 0.006724696 | -0.423533606 |
| 1200 | NFATC2  | 4773 | 2.59E-05    | 0.604681713  |
| 1201 | NFE2L1  | 4779 | 0.001206067 | -0.492356037 |
| 1202 | NFE2L2  | 4780 | 0.000298219 | -0.539096546 |
| 1203 | NFIB    | 4781 | 0.007724063 | -0.417109554 |
| 1204 | NFKB1   | 4790 | 1.88E-08    | 0.738904613  |
| 1205 | NFKBIB  | 4793 | 0.001159615 | -0.493749786 |
| 1206 | NFKBIL2 | 4796 | 4.46E-07    | 0.687765569  |
| 1207 | NFRKB   | 4798 | 3.43E-09    | 0.762772526  |
| 1208 | NHLH1   | 4807 | 2.87E-11    | 0.828433668  |
| 1209 | NHP2L1  | 4809 | 0.000302517 | -0.538647623 |

|      |         |      |             |              |
|------|---------|------|-------------|--------------|
| 1210 | NKX2-2  | 4821 | 1.73E-05    | 0.61418659   |
| 1211 | NKX3-1  | 4824 | 0.002202651 | 0.469908307  |
| 1212 | NNAT    | 4826 | 7.92E-10    | 0.782341194  |
| 1213 | NMB     | 4828 | 1.62E-07    | 0.705214445  |
| 1214 | NMBR    | 4829 | 0.0012112   | 0.492213287  |
| 1215 | NME3    | 4832 | 0.003913555 | -0.446803665 |
| 1216 | NMT1    | 4836 | 0.004767969 | -0.438515968 |
| 1217 | NODAL   | 4838 | 7.07E-08    | 0.718439989  |
| 1218 | NOL1    | 4839 | 0.005534813 | -0.432071423 |
| 1219 | NONO    | 4841 | 0.001663157 | -0.480540494 |
| 1220 | NOS1    | 4842 | 1.60E-06    | 0.664296785  |
| 1221 | CNOT2   | 4848 | 0.00904057  | -0.409645583 |
| 1222 | CNOT3   | 4849 | 0.004836942 | -0.437923551 |
| 1223 | CNOT4   | 4850 | 0.00147191  | -0.485072791 |
| 1224 | NOTCH2  | 4853 | 0.000149021 | -0.559378324 |
| 1225 | NOTCH4  | 4855 | 2.39E-06    | 0.656520406  |
| 1226 | NOVA2   | 4858 | 0.0009278   | -0.501711398 |
| 1227 | NPM1    | 4869 | 0.000833623 | -0.505493016 |
| 1228 | NPY2R   | 4887 | 1.83E-07    | 0.703120367  |
| 1229 | NPY6R   | 4888 | 0.000886472 | 0.503360029  |
| 1230 | NPY5R   | 4889 | 0.001661341 | 0.480581095  |
| 1231 | NRAP    | 4892 | 0.003594914 | 0.450392417  |
| 1232 | NRF1    | 4899 | 0.006102597 | -0.4277658   |
| 1233 | NRGN    | 4900 | 2.80E-09    | 0.765387501  |
| 1234 | NRL     | 4901 | 3.59E-10    | 0.792627896  |
| 1235 | NSF     | 4905 | 0.00489164  | -0.437420786 |
| 1236 | NTRK3   | 4916 | 1.13E-11    | 0.851461723  |
| 1237 | NTSR1   | 4923 | 1.57E-11    | 0.839410473  |
| 1238 | NUCB1   | 4924 | 0.007336777 | -0.419520308 |
| 1239 | NUP98   | 4928 | 0.000391059 | -0.530644175 |
| 1240 | OAS3    | 4940 | 5.88E-11    | 0.817725456  |
| 1241 | TBC1D25 | 4943 | 9.42E-11    | 0.81059999   |
| 1242 | OAZ1    | 4946 | 0.000386835 | -0.530966699 |
| 1243 | OCLN    | 4950 | 0.005491482 | -0.432384259 |
| 1244 | ODF1    | 4956 | 1.23E-10    | 0.806943373  |
| 1245 | ODF2    | 4957 | 0.009045521 | -0.40959985  |
| 1246 | OGG1    | 4968 | 0.000838042 | -0.505306954 |
| 1247 | OMG     | 4974 | 0.001265248 | 0.490644072  |
| 1248 | OMP     | 4975 | 0.005075451 | 0.435839524  |
| 1249 | OPA1    | 4976 | 2.49E-08    | 0.734553979  |
| 1250 | OPCML   | 4978 | 0.000262128 | 0.542988583  |
| 1251 | OPRM1   | 4988 | 1.93E-10    | 0.800907874  |
| 1252 | OR1D2   | 4991 | 4.01E-06    | 0.646139683  |
| 1253 | ORC4L   | 5000 | 0.000182172 | -0.5536482   |
| 1254 | ORC5L   | 5001 | 0.001121441 | -0.494949178 |

|      |            |      |             |              |
|------|------------|------|-------------|--------------|
| 1255 | SLC22A18AS | 5003 | 0.000141672 | 0.560788759  |
| 1256 | OTC        | 5009 | 4.04E-06    | 0.645993633  |
| 1257 | OXA1L      | 5018 | 9.00E-05    | -0.573267736 |
| 1258 | OXT        | 5020 | 0.008400125 | 0.413137501  |
| 1259 | P2RX1      | 5023 | 8.99E-07    | 0.67511234   |
| 1260 | P2RX3      | 5024 | 3.68E-05    | 0.596152502  |
| 1261 | P2RX5      | 5026 | 4.18E-09    | 0.760078196  |
| 1262 | P2RY4      | 5030 | 2.02E-05    | 0.610706708  |
| 1263 | P4HB       | 5034 | 2.09E-05    | -0.609838417 |
| 1264 | PA2G4      | 5036 | 0.0008854   | -0.503413471 |
| 1265 | PEBP1      | 5037 | 0.000167261 | -0.556102746 |
| 1266 | PABPC3     | 5042 | 6.66E-06    | -0.635559265 |
| 1267 | PAFAH1B1   | 5048 | 0.000230527 | -0.546827281 |
| 1268 | PAFAH1B2   | 5049 | 0.000122077 | -0.564878479 |
| 1269 | PAFAH2     | 5051 | 0.000190837 | 0.552339775  |
| 1270 | SERPINB2   | 5055 | 0.000108094 | 0.56832821   |
| 1271 | PAK2       | 5062 | 0.005271363 | -0.43420818  |
| 1272 | PAK3       | 5063 | 2.48E-09    | 0.766981899  |
| 1273 | PARK2      | 5071 | 4.57E-09    | 0.7588334    |
| 1274 | PAX1       | 5075 | 0.000216634 | 0.548656663  |
| 1275 | PAX3       | 5077 | 2.31E-05    | 0.607463754  |
| 1276 | PAX5       | 5079 | 4.13E-10    | 0.790810122  |
| 1277 | PAX6       | 5080 | 0.004765977 | 0.438541754  |
| 1278 | PAX7       | 5081 | 1.75E-05    | 0.61401943   |
| 1279 | PAX9       | 5083 | 5.56E-11    | 0.81852914   |
| 1280 | PBX2       | 5089 | 0.000597673 | 0.51693988   |
| 1281 | PCNT       | 5116 | 1.54E-06    | 0.665118902  |
| 1282 | CHMP1A     | 5119 | 0.005284327 | -0.434112237 |
| 1283 | PCSK1      | 5122 | 2.58E-06    | 0.654984887  |
| 1284 | PCYT1A     | 5130 | 0.004512446 | -0.440838274 |
| 1285 | PDC        | 5132 | 7.00E-05    | 0.579827198  |
| 1286 | PDCD1      | 5133 | 1.41E-06    | 0.666708298  |
| 1287 | PDCD2      | 5134 | 0.008133438 | -0.414688093 |
| 1288 | PDE1C      | 5137 | 2.59E-11    | 0.830949379  |
| 1289 | PDE2A      | 5138 | 0.000720718 | 0.510499216  |
| 1290 | PDE3B      | 5140 | 0.001275505 | 0.490347702  |
| 1291 | PDE4B      | 5142 | 0.003635649 | 0.449937164  |
| 1292 | PDE4D      | 5144 | 0.005681232 | 0.430947728  |
| 1293 | PDE6A      | 5145 | 8.16E-11    | 0.812417826  |
| 1294 | PDGFA      | 5154 | 0.000788629 | -0.507444141 |
| 1295 | PDGFB      | 5155 | 1.30E-11    | 0.846392141  |
| 1296 | PDE6B      | 5158 | 0.007012029 | -0.421629879 |
| 1297 | PDHA1      | 5160 | 0.000249614 | -0.544446572 |
| 1298 | PDHA2      | 5161 | 0.008491571 | 0.412600485  |
| 1299 | PDHB       | 5162 | 0.000905031 | -0.502664577 |

|      |           |      |             |              |
|------|-----------|------|-------------|--------------|
| 1300 | ENPP1     | 5167 | 5.64E-11    | 0.818187795  |
| 1301 | ENPP3     | 5169 | 2.16E-05    | 0.609143324  |
| 1302 | PDPK1     | 5170 | 0.001147584 | -0.49413319  |
| 1303 | SLC26A4   | 5172 | 7.12E-07    | 0.679360252  |
| 1304 | PECAM1    | 5175 | 1.65E-07    | 0.704894336  |
| 1305 | PEX7      | 5191 | 7.63E-07    | 0.67813092   |
| 1306 | PF4       | 5196 | 0.0001307   | 0.562970781  |
| 1307 | PFAS      | 5198 | 0.001007499 | -0.498782077 |
| 1308 | PFDN5     | 5204 | 0.00024451  | -0.54509325  |
| 1309 | ATP8B1    | 5205 | 0.001055758 | -0.497079816 |
| 1310 | PFKFB1    | 5207 | 5.50E-09    | 0.756276344  |
| 1311 | PFKM      | 5213 | 0.005418042 | -0.432983165 |
| 1312 | PFKP      | 5214 | 0.006278015 | -0.42655638  |
| 1313 | PFN1      | 5216 | 0.006875145 | -0.422525067 |
| 1314 | PGAM1     | 5223 | 0.004282714 | -0.443043712 |
| 1315 | PGC       | 5225 | 0.001355991 | 0.488187428  |
| 1316 | PGM5      | 5239 | 7.28E-08    | 0.717998629  |
| 1317 | ABCB1     | 5243 | 2.56E-07    | 0.697454741  |
| 1318 | SLC25A3   | 5250 | 0.005377445 | -0.433282686 |
| 1319 | PHF1      | 5252 | 2.03E-08    | 0.737732904  |
| 1320 | PHKB      | 5257 | 0.008168373 | -0.414470729 |
| 1321 | PHKG1     | 5260 | 1.09E-10    | 0.808559445  |
| 1322 | PHKG2     | 5261 | 1.06E-09    | 0.778357911  |
| 1323 | SERPINA4  | 5267 | 2.27E-08    | 0.73600323   |
| 1324 | SERPINB8  | 5271 | 4.04E-11    | 0.823115606  |
| 1325 | SERPINB10 | 5273 | 4.04E-07    | 0.689523616  |
| 1326 | SERPINB13 | 5275 | 0.003716709 | 0.449010112  |
| 1327 | PIGC      | 5279 | 0.008376565 | -0.413285883 |
| 1328 | PIGF      | 5281 | 0.000412252 | -0.528978496 |
| 1329 | PIK3C2A   | 5286 | 4.60E-05    | -0.590611262 |
| 1330 | PIK3C2G   | 5288 | 8.26E-11    | 0.812178476  |
| 1331 | PIK3CB    | 5291 | 0.008915497 | -0.410316308 |
| 1332 | PIK3CG    | 5294 | 0.000756454 | 0.508922726  |
| 1333 | PIN1      | 5300 | 1.74E-06    | 0.662667267  |
| 1334 | PIN1L     | 5301 | 1.20E-09    | 0.77665765   |
| 1335 | PIN4      | 5303 | 0.00027509  | -0.541549682 |
| 1336 | PITPNA    | 5306 | 0.000213064 | -0.549162195 |
| 1337 | PITX3     | 5309 | 2.91E-10    | 0.795302006  |
| 1338 | PKLR      | 5313 | 1.33E-09    | 0.775240811  |
| 1339 | PKHD1     | 5314 | 1.12E-10    | 0.808242153  |
| 1340 | PKP1      | 5317 | 1.56E-10    | 0.803901389  |
| 1341 | PLA2G1B   | 5319 | 0.00566321  | 0.431113305  |
| 1342 | PLA2G5    | 5322 | 5.99E-11    | 0.817413284  |
| 1343 | PLCB2     | 5330 | 1.84E-11    | 0.836616269  |
| 1344 | PLCB3     | 5331 | 0.001039742 | -0.497620008 |

|      |          |      |             |              |
|------|----------|------|-------------|--------------|
| 1345 | PLCD1    | 5333 | 1.52E-08    | 0.742032905  |
| 1346 | PLCG2    | 5336 | 3.67E-07    | 0.691276063  |
| 1347 | PLD1     | 5337 | 0.002724719 | 0.461587807  |
| 1348 | PLG      | 5340 | 7.99E-05    | 0.576427997  |
| 1349 | PLIN     | 5346 | 5.59E-09    | 0.756031849  |
| 1350 | FXYD3    | 5349 | 0.000262843 | 0.542900245  |
| 1351 | PLN      | 5350 | 2.77E-06    | 0.653663786  |
| 1352 | PLRG1    | 5356 | 0.000725146 | -0.510306712 |
| 1353 | PLXNA1   | 5361 | 0.00291109  | -0.458989164 |
| 1354 | PLXNA2   | 5362 | 7.65E-10    | 0.782813974  |
| 1355 | PMCH     | 5367 | 0.003822502 | 0.447841382  |
| 1356 | Unknown  | 5370 | 1.21E-05    | 0.622526221  |
| 1357 | PMM2     | 5373 | 0.006551107 | -0.424708711 |
| 1358 | PMP2     | 5375 | 2.34E-06    | 0.656956152  |
| 1359 | PMS2L3   | 5387 | 0.00725627  | -0.420054521 |
| 1360 | EXOSC10  | 5394 | 0.001047258 | -0.497360386 |
| 1361 | PNLIP    | 5406 | 8.20E-07    | 0.676838547  |
| 1362 | PNLIPRP1 | 5407 | 4.00E-10    | 0.791164267  |
| 1363 | PNN      | 5411 | 5.82E-05    | -0.584600689 |
| 1364 | 4-Sep    | 5414 | 8.99E-10    | 0.780720614  |
| 1365 | PODXL    | 5420 | 0.002517216 | -0.46478332  |
| 1366 | POLB     | 5423 | 2.18E-07    | 0.700163433  |
| 1367 | POLD1    | 5424 | 6.03E-05    | 0.583665935  |
| 1368 | POLD2    | 5425 | 0.0022455   | -0.469170557 |
| 1369 | POLE2    | 5427 | 0.001409934 | 0.486648736  |
| 1370 | POLR2A   | 5430 | 0.000536123 | -0.520502876 |
| 1371 | POLR2B   | 5431 | 3.71E-08    | -0.72845218  |
| 1372 | POLR2E   | 5434 | 3.43E-05    | -0.597950414 |
| 1373 | POLR2G   | 5436 | 0.008479476 | -0.412677132 |
| 1374 | POLR2H   | 5437 | 0.000528432 | -0.520963471 |
| 1375 | POLR2I   | 5438 | 0.006234247 | -0.426851843 |
| 1376 | POLR2J   | 5439 | 8.65E-05    | -0.574340047 |
| 1377 | POLR2L   | 5441 | 0.001388903 | -0.487259851 |
| 1378 | PON3     | 5446 | 9.04E-07    | 0.675003873  |
| 1379 | POR      | 5447 | 0.001542069 | -0.483355686 |
| 1380 | POU2F2   | 5452 | 0.000860967 | 0.504387711  |
| 1381 | POU3F1   | 5453 | 9.07E-11    | 0.811071764  |
| 1382 | POU3F2   | 5454 | 1.49E-08    | 0.742334438  |
| 1383 | POU3F3   | 5455 | 0.000160069 | 0.557346259  |
| 1384 | POU4F2   | 5458 | 0.000101406 | 0.570064767  |
| 1385 | POU6F1   | 5463 | 8.98E-06    | 0.629037616  |
| 1386 | PPARA    | 5465 | 0.00186353  | -0.476175834 |
| 1387 | PPARG    | 5468 | 0.000636258 | 0.51476712   |
| 1388 | MED1     | 5469 | 0.000505558 | 0.522431428  |
| 1389 | PPAT     | 5471 | 0.003075233 | 0.45685537   |

|      |         |      |             |              |
|------|---------|------|-------------|--------------|
| 1390 | PPBP    | 5473 | 2.44E-08    | 0.734921351  |
| 1391 | PPEF1   | 5475 | 4.46E-07    | 0.687789761  |
| 1392 | CTSA    | 5476 | 0.001114876 | -0.495152038 |
| 1393 | PPIA    | 5478 | 0.000178323 | -0.55428696  |
| 1394 | PPIB    | 5479 | 0.00477502  | -0.438446286 |
| 1395 | PPID    | 5481 | 0.005098671 | -0.435624445 |
| 1396 | PPL     | 5493 | 0.00249499  | -0.465136207 |
| 1397 | PPM1G   | 5496 | 0.00237527  | 0.467134387  |
| 1398 | PPP1CA  | 5499 | 0.001591642 | -0.482164677 |
| 1399 | PPP1R1A | 5502 | 9.34E-08    | 0.714049539  |
| 1400 | PPP1R2  | 5504 | 0.009275447 | -0.408389435 |
| 1401 | PPP1R3A | 5506 | 4.10E-05    | 0.593451523  |
| 1402 | PPP1R3C | 5507 | 3.10E-09    | 0.764105749  |
| 1403 | PPP1R7  | 5510 | 0.005474187 | -0.432536834 |
| 1404 | PPP1R8  | 5511 | 0.000534405 | -0.520605803 |
| 1405 | PPP2CB  | 5516 | 0.009404943 | -0.407708323 |
| 1406 | PPP2R2C | 5522 | 4.07E-05    | 0.593678932  |
| 1407 | PPP2R4  | 5524 | 0.007911408 | -0.416027024 |
| 1408 | PPP2R5A | 5525 | 0.00928476  | -0.408339197 |
| 1409 | PPP2R5C | 5527 | 0.003809865 | -0.447996018 |
| 1410 | PPP2R5E | 5529 | 0.008392045 | -0.41319154  |
| 1411 | PPP3CA  | 5530 | 0.003483548 | -0.45171079  |
| 1412 | PPP4C   | 5531 | 0.005838565 | -0.429744306 |
| 1413 | PPP3CB  | 5532 | 0.000868853 | -0.504073803 |
| 1414 | PPP3R2  | 5535 | 7.31E-08    | 0.717940214  |
| 1415 | PRB1    | 5542 | 5.35E-10    | 0.787377487  |
| 1416 | PRB4    | 5545 | 5.01E-11    | 0.82048759   |
| 1417 | PRCC    | 5546 | 2.91E-08    | 0.732157473  |
| 1418 | PRCP    | 5547 | 0.002536278 | -0.464502027 |
| 1419 | PREP    | 5550 | 1.91E-08    | 0.738630904  |
| 1420 | PRF1    | 5551 | 2.69E-10    | 0.796315134  |
| 1421 | Unknown | 5554 | 0.002151804 | 0.470779868  |
| 1422 | PRKACA  | 5566 | 0.000468033 | -0.524974871 |
| 1423 | PRKAG1  | 5571 | 0.002092318 | -0.471869388 |
| 1424 | PRKAR1A | 5573 | 0.00231427  | -0.468051979 |
| 1425 | PRKAR1B | 5575 | 1.78E-10    | 0.801972572  |
| 1426 | PRKAR2A | 5576 | 7.61E-06    | -0.632742813 |
| 1427 | PRKCB1  | 5579 | 4.95E-09    | 0.757689312  |
| 1428 | PRKCD   | 5580 | 0.002914455 | -0.458944187 |
| 1429 | PRKCI   | 5584 | 0.005023381 | -0.436287741 |
| 1430 | PKN2    | 5586 | 0.002679139 | -0.462296171 |
| 1431 | PRKCQ   | 5588 | 3.99E-06    | 0.646270174  |
| 1432 | PRKCZ   | 5590 | 0.002731664 | -0.4614796   |
| 1433 | PRKG2   | 5593 | 1.05E-08    | 0.747230457  |
| 1434 | MAPK3   | 5595 | 0.001409661 | -0.486660436 |



|      |         |      |             |              |
|------|---------|------|-------------|--------------|
| 1435 | MAPK4   | 5596 | 4.97E-06    | 0.641705402  |
| 1436 | MAPK7   | 5598 | 3.73E-09    | 0.761703679  |
| 1437 | MAPK8   | 5599 | 8.79E-06    | 0.629561288  |
| 1438 | MAPK9   | 5601 | 0.008685209 | -0.411536653 |
| 1439 | MAP2K2  | 5605 | 0.000128508 | -0.563440272 |
| 1440 | MAP2K3  | 5606 | 0.005290391 | -0.434045403 |
| 1441 | MAP2K5  | 5607 | 1.03E-08    | 0.747498668  |
| 1442 | EIF2AK2 | 5610 | 0.003948608 | -0.446449354 |
| 1443 | DNAJC3  | 5611 | 0.004472884 | -0.441177905 |
| 1444 | PRL     | 5617 | 2.39E-06    | 0.656563295  |
| 1445 | PRLR    | 5618 | 2.24E-05    | 0.608265876  |
| 1446 | PRM1    | 5619 | 1.36E-09    | 0.774996033  |
| 1447 | PROP1   | 5626 | 1.57E-09    | 0.773180728  |
| 1448 | PRPH    | 5630 | 3.96E-11    | 0.823584659  |
| 1449 | LGMN    | 5641 | 6.33E-06    | 0.636665432  |
| 1450 | PRSS1   | 5644 | 0.000752557 | 0.509108843  |
| 1451 | MASP1   | 5648 | 5.03E-09    | 0.757438065  |
| 1452 | PRSS7   | 5651 | 3.49E-06    | 0.648961805  |
| 1453 | PSAP    | 5660 | 0.008452682 | -0.412822266 |
| 1454 | PSG1    | 5669 | 1.61E-11    | 0.838159137  |
| 1455 | Unknown | 5670 | 2.07E-10    | 0.799883248  |
| 1456 | PSG3    | 5671 | 2.15E-09    | 0.76886931   |
| 1457 | Unknown | 5672 | 1.16E-08    | 0.745790163  |
| 1458 | Unknown | 5676 | 2.66E-10    | 0.796437344  |
| 1459 | PSG9    | 5678 | 8.36E-07    | 0.67645345   |
| 1460 | PSG11   | 5680 | 5.20E-08    | 0.723294186  |
| 1461 | PSKH1   | 5681 | 0.00028626  | 0.540343206  |
| 1462 | PSMA1   | 5682 | 0.000386167 | -0.531020216 |
| 1463 | PSMA2   | 5683 | 0.005652671 | -0.431187948 |
| 1464 | PSMA3   | 5684 | 0.003525827 | -0.451229074 |
| 1465 | PSMA4   | 5685 | 0.001016508 | -0.498449142 |
| 1466 | PSMA5   | 5686 | 0.004941995 | -0.436988775 |
| 1467 | PSMA6   | 5687 | 0.001014007 | -0.498558133 |
| 1468 | PSMA7   | 5688 | 0.003809767 | -0.448002262 |
| 1469 | PSMB1   | 5689 | 0.000907952 | -0.502521915 |
| 1470 | PSMB3   | 5691 | 0.005039784 | -0.436156364 |
| 1471 | PSMB4   | 5692 | 3.60E-05    | -0.596724095 |
| 1472 | PSMB6   | 5694 | 0.008639992 | -0.411783272 |
| 1473 | PSMB7   | 5695 | 0.002826626 | -0.460131297 |
| 1474 | PSMC1   | 5700 | 0.002565219 | -0.464043241 |
| 1475 | PSMC5   | 5705 | 7.55E-07    | -0.678299658 |
| 1476 | PSMC6   | 5706 | 0.000315467 | -0.537405288 |
| 1477 | PSMD1   | 5707 | 6.14E-05    | -0.583184279 |
| 1478 | PSMD2   | 5708 | 0.005357332 | -0.433458075 |
| 1479 | PSMD4   | 5710 | 0.006594072 | -0.424418581 |

|      |          |      |             |              |
|------|----------|------|-------------|--------------|
| 1480 | PSMD12   | 5718 | 0.003134312 | -0.456058122 |
| 1481 | PSMD13   | 5719 | 0.001595106 | -0.482077651 |
| 1482 | PSME1    | 5720 | 0.003541725 | -0.451028388 |
| 1483 | PSME2    | 5721 | 0.001373827 | -0.487660517 |
| 1484 | PTBP1    | 5725 | 5.36E-05    | -0.58675034  |
| 1485 | TAS2R38  | 5726 | 1.56E-09    | 0.773257502  |
| 1486 | PTGDR    | 5729 | 3.09E-05    | 0.600439022  |
| 1487 | PTGIR    | 5739 | 9.53E-07    | 0.67404846   |
| 1488 | PTHLH    | 5744 | 2.25E-06    | 0.657744546  |
| 1489 | PTK2     | 5747 | 0.000425452 | -0.527973754 |
| 1490 | PTK7     | 5754 | 2.48E-06    | 0.655762808  |
| 1491 | TWF1     | 5756 | 0.004133398 | -0.444572985 |
| 1492 | PTMA     | 5757 | 0.00299105  | -0.457908083 |
| 1493 | PTMS     | 5763 | 0.003114091 | -0.456319499 |
| 1494 | QSOX1    | 5768 | 7.94E-10    | 0.782296822  |
| 1495 | PTPN4    | 5775 | 0.005328196 | -0.433706983 |
| 1496 | PTPN6    | 5777 | 0.002645085 | -0.462800295 |
| 1497 | PTPN7    | 5778 | 0.004524694 | 0.440729605  |
| 1498 | PTPN9    | 5780 | 0.004880771 | 0.437514954  |
| 1499 | PTPN11   | 5781 | 0.003280353 | 0.454161928  |
| 1500 | PTPN12   | 5782 | 0.000621292 | -0.515606779 |
| 1501 | PTPRA    | 5786 | 0.003432343 | -0.452293235 |
| 1502 | PTPRD    | 5789 | 0.000702303 | 0.51143074   |
| 1503 | PTPRF    | 5792 | 0.000173928 | -0.554984985 |
| 1504 | PTPRN    | 5798 | 4.56E-09    | 0.758868237  |
| 1505 | PTPRS    | 5802 | 0.008070581 | -0.415084394 |
| 1506 | PTS      | 5805 | 0.005295904 | -0.433998732 |
| 1507 | PURA     | 5813 | 0.008070299 | -0.415099111 |
| 1508 | PVR      | 5817 | 3.56E-11    | 0.825410133  |
| 1509 | PVRL1    | 5818 | 6.28E-09    | 0.75443486   |
| 1510 | PVRL2    | 5819 | 0.004877875 | -0.437547193 |
| 1511 | PWP2     | 5822 | 7.00E-05    | -0.579809689 |
| 1512 | ABCD3    | 5825 | 0.000321765 | -0.536804294 |
| 1513 | PXMP2    | 5827 | 0.009684165 | 0.406373367  |
| 1514 | PXMP3    | 5828 | 0.000453191 | 0.525971143  |
| 1515 | PEX5     | 5830 | 0.007378692 | -0.419253815 |
| 1516 | ALDH18A1 | 5832 | 0.00016293  | -0.556829713 |
| 1517 | PCYT2    | 5833 | 1.90E-05    | -0.612152872 |
| 1518 | PYGM     | 5837 | 2.01E-06    | 0.660003064  |
| 1519 | QARS     | 5859 | 2.49E-08    | -0.734521717 |
| 1520 | RAB1A    | 5861 | 0.001723238 | -0.479189018 |
| 1521 | RAB2A    | 5862 | 0.002066628 | -0.47233646  |
| 1522 | RAB3B    | 5865 | 2.64E-11    | 0.830163617  |
| 1523 | RAB3IL1  | 5866 | 0.004528116 | 0.440691661  |
| 1524 | RAB4A    | 5867 | 0.0041349   | -0.44455467  |

|      |         |      |             |              |
|------|---------|------|-------------|--------------|
| 1525 | RAB5A   | 5868 | 0.000714755 | 0.510806398  |
| 1526 | RAB5B   | 5869 | 0.000179351 | -0.554102837 |
| 1527 | RAB6A   | 5870 | 0.000258327 | -0.543405294 |
| 1528 | RABGGTA | 5875 | 0.007425447 | -0.418963214 |
| 1529 | RABGGTB | 5876 | 0.001409314 | -0.486673772 |
| 1530 | RAB5C   | 5878 | 1.63E-07    | 0.705178946  |
| 1531 | RAC1    | 5879 | 0.001612787 | -0.481680957 |
| 1532 | RAD21   | 5885 | 0.002143924 | -0.470928496 |
| 1533 | RAD23B  | 5887 | 0.008245248 | -0.414045077 |
| 1534 | RAD51   | 5888 | 1.26E-09    | 0.776004987  |
| 1535 | RAD51L1 | 5890 | 3.14E-09    | 0.763922128  |
| 1536 | RAD51L3 | 5892 | 1.83E-05    | 0.612999872  |
| 1537 | RAF1    | 5894 | 4.07E-05    | -0.593690423 |
| 1538 | RAG1    | 5896 | 2.68E-08    | 0.733472588  |
| 1539 | RALA    | 5898 | 0.001474834 | -0.484987678 |
| 1540 | RANBP2  | 5903 | 0.005475175 | -0.432520828 |
| 1541 | RAP1A   | 5906 | 0.000619643 | -0.515689228 |
| 1542 | RAP1B   | 5908 | 0.000314738 | -0.537484578 |
| 1543 | RAP1GAP | 5909 | 0.002904388 | -0.459084344 |
| 1544 | RAP2B   | 5912 | 0.006102597 | -0.427760626 |
| 1545 | RARG    | 5916 | 7.52E-10    | 0.783030367  |
| 1546 | RARS    | 5917 | 0.003262165 | -0.454414276 |
| 1547 | RASA1   | 5921 | 0.000990375 | -0.499398747 |
| 1548 | RASA2   | 5922 | 0.001875971 | -0.475924026 |
| 1549 | JARID1A | 5927 | 0.006320249 | -0.426261259 |
| 1550 | RBBP4   | 5928 | 0.004045897 | -0.445449138 |
| 1551 | RBBP7   | 5931 | 2.91E-05    | -0.601899732 |
| 1552 | RBL1    | 5933 | 0.002446414 | 0.465932944  |
| 1553 | RBL2    | 5934 | 6.51E-05    | -0.581697676 |
| 1554 | RBMS1   | 5937 | 0.002928586 | -0.458740576 |
| 1555 | RBMS2   | 5939 | 2.45E-08    | 0.734824017  |
| 1556 | RBP2    | 5948 | 6.39E-05    | 0.582184558  |
| 1557 | RCN1    | 5954 | 0.004340549 | -0.442467717 |
| 1558 | RCVRN   | 5957 | 3.02E-08    | 0.731584393  |
| 1559 | PRPH2   | 5961 | 0.000216819 | 0.548628314  |
| 1560 | RDX     | 5962 | 0.005740443 | -0.430498093 |
| 1561 | RECQL   | 5965 | 0.004291941 | -0.44295767  |
| 1562 | REL     | 5966 | 2.46E-08    | 0.734770749  |
| 1563 | REGL    | 5969 | 1.30E-11    | 0.843810142  |
| 1564 | RELA    | 5970 | 0.001392287 | -0.487157051 |
| 1565 | RENBP   | 5973 | 0.000765184 | 0.508537729  |
| 1566 | UPF1    | 5976 | 0.004364949 | -0.442212864 |
| 1567 | DPF2    | 5977 | 0.002372247 | -0.467182428 |
| 1568 | REST    | 5978 | 7.42E-06    | 0.633268652  |
| 1569 | RET     | 5979 | 2.48E-10    | 0.797403933  |

|      |        |      |             |              |
|------|--------|------|-------------|--------------|
| 1570 | REV3L  | 5980 | 0.007135591 | -0.420876547 |
| 1571 | RFC1   | 5981 | 0.000298158 | -0.539108182 |
| 1572 | RFNG   | 5986 | 9.89E-06    | -0.626918224 |
| 1573 | RFX1   | 5989 | 0.007411542 | -0.419045998 |
| 1574 | RFXAP  | 5994 | 0.002919984 | -0.458863021 |
| 1575 | RGR    | 5995 | 1.62E-08    | 0.741111847  |
| 1576 | RGS13  | 6003 | 0.001135714 | 0.494498329  |
| 1577 | RIT2   | 6014 | 0.000910628 | 0.502416385  |
| 1578 | RLBP1  | 6017 | 5.79E-08    | 0.721646034  |
| 1579 | RNASE2 | 6036 | 2.94E-05    | 0.601617517  |
| 1580 | RNASE3 | 6037 | 3.01E-07    | 0.694646668  |
| 1581 | BRD2   | 6046 | 0.007690252 | -0.417305808 |
| 1582 | RNF4   | 6047 | 0.001740197 | -0.478795911 |
| 1583 | RNF5   | 6048 | 1.54E-05    | 0.616956247  |
| 1584 | RNF6   | 6049 | 0.000969744 | -0.500115601 |
| 1585 | RNH1   | 6050 | 4.02E-05    | -0.593992423 |
| 1586 | RNPEP  | 6051 | 0.003122869 | -0.456206087 |
| 1587 | ABCE1  | 6059 | 0.004007396 | -0.445869895 |
| 1588 | ROBO2  | 6092 | 0.000264808 | 0.54267646   |
| 1589 | ROM1   | 6094 | 0.001357963 | -0.488114738 |
| 1590 | RORB   | 6096 | 0.001760271 | 0.478358716  |
| 1591 | RPE    | 6120 | 0.004237526 | -0.443538011 |
| 1592 | RPL3   | 6122 | 0.000395435 | -0.530301898 |
| 1593 | RPL3L  | 6123 | 5.02E-12    | 0.863420446  |
| 1594 | RPL4   | 6124 | 0.000427423 | -0.527815574 |
| 1595 | RPL5   | 6125 | 0.000915985 | -0.502190452 |
| 1596 | RPL6   | 6128 | 0.000285631 | -0.540407918 |
| 1597 | RPL7   | 6129 | 0.00110897  | -0.495354641 |
| 1598 | RPL7A  | 6130 | 0.002487794 | -0.465271483 |
| 1599 | RPL8   | 6132 | 0.000905822 | -0.502615362 |
| 1600 | RPL9   | 6133 | 0.000926622 | -0.501767125 |
| 1601 | RPL10  | 6134 | 1.72E-05    | -0.614377305 |
| 1602 | RPL11  | 6135 | 6.70E-06    | -0.6354481   |
| 1603 | RPL12  | 6136 | 0.000143754 | -0.56038006  |
| 1604 | RPL13  | 6137 | 0.000454457 | -0.525875314 |
| 1605 | RPL15  | 6138 | 0.000185781 | -0.553090373 |
| 1606 | RPL17  | 6139 | 0.000779683 | -0.50784486  |
| 1607 | RPL18  | 6141 | 6.53E-05    | -0.581610915 |
| 1608 | RPL19  | 6143 | 8.71E-06    | -0.629778682 |
| 1609 | RPL21  | 6144 | 2.44E-05    | -0.606184423 |
| 1610 | RPL22  | 6146 | 0.000124081 | -0.564420173 |
| 1611 | RPL23A | 6147 | 2.45E-06    | -0.656034811 |
| 1612 | RPL24  | 6152 | 3.96E-05    | -0.594327276 |
| 1613 | RPL26  | 6154 | 0.000163436 | -0.556732465 |
| 1614 | RPL27  | 6155 | 0.001605749 | -0.481837425 |

|      |         |      |             |              |
|------|---------|------|-------------|--------------|
| 1615 | RPL30   | 6156 | 0.000479862 | -0.524125779 |
| 1616 | RPL27A  | 6157 | 5.63E-05    | -0.585521218 |
| 1617 | RPL28   | 6158 | 0.000166835 | -0.556180012 |
| 1618 | RPL29   | 6159 | 8.54E-06    | -0.630214322 |
| 1619 | RPL31   | 6160 | 0.000160338 | -0.557291404 |
| 1620 | RPL32   | 6161 | 8.16E-07    | -0.676948412 |
| 1621 | RPL34   | 6164 | 3.80E-05    | -0.595385546 |
| 1622 | RPL35A  | 6165 | 0.000407214 | -0.529348238 |
| 1623 | RPL36AL | 6166 | 0.001748061 | -0.478628318 |
| 1624 | RPL37   | 6167 | 0.000269385 | -0.542161121 |
| 1625 | RPL37A  | 6168 | 0.000116652 | -0.566192105 |
| 1626 | RPL38   | 6169 | 2.20E-05    | -0.608726088 |
| 1627 | RPL39   | 6170 | 0.000126478 | -0.563890853 |
| 1628 | RPL41   | 6171 | 0.000254336 | -0.543871504 |
| 1629 | RPL36A  | 6173 | 0.000605725 | -0.51649617  |
| 1630 | RPLP0   | 6175 | 0.001842829 | -0.476615862 |
| 1631 | RPLP1   | 6176 | 9.14E-05    | -0.572832119 |
| 1632 | RPLP2   | 6181 | 0.000101313 | -0.570096167 |
| 1633 | RPN2    | 6185 | 0.00143689  | -0.485984579 |
| 1634 | RPS2    | 6187 | 0.000222652 | -0.547857455 |
| 1635 | RPS3    | 6188 | 4.31E-05    | -0.592222744 |
| 1636 | RPS3A   | 6189 | 0.000711138 | -0.510983881 |
| 1637 | RPS4X   | 6191 | 8.02E-05    | -0.576296571 |
| 1638 | RPS4Y1  | 6192 | 0.000255713 | 0.543704433  |
| 1639 | RPS5    | 6193 | 0.000496898 | -0.522989949 |
| 1640 | RPS6    | 6194 | 5.86E-05    | -0.584369425 |
| 1641 | RPS6KB1 | 6198 | 6.76E-05    | -0.580716632 |
| 1642 | RPS6KB2 | 6199 | 0.001241043 | -0.491357084 |
| 1643 | RPS7    | 6201 | 0.000105198 | -0.569065459 |
| 1644 | RPS8    | 6202 | 2.72E-05    | -0.603521413 |
| 1645 | RPS9    | 6203 | 0.000689178 | -0.512080204 |
| 1646 | RPS10   | 6204 | 4.33E-06    | -0.644503698 |
| 1647 | RPS11   | 6205 | 0.000317821 | -0.537173281 |
| 1648 | RPS12   | 6206 | 8.99E-06    | -0.6290223   |
| 1649 | RPS13   | 6207 | 1.98E-05    | -0.611101505 |
| 1650 | RPS14   | 6208 | 0.000254165 | -0.543901506 |
| 1651 | RPS15   | 6209 | 3.52E-05    | -0.59728554  |
| 1652 | RPS15A  | 6210 | 0.000187657 | -0.552801804 |
| 1653 | RPS16   | 6217 | 2.74E-06    | -0.653878005 |
| 1654 | RPS17   | 6218 | 0.001292534 | -0.489900642 |
| 1655 | RPS18   | 6222 | 6.30E-06    | -0.636779741 |
| 1656 | RPS19   | 6223 | 6.08E-05    | -0.583481686 |
| 1657 | RPS20   | 6224 | 0.000197378 | -0.551336641 |
| 1658 | RPS21   | 6227 | 0.000193349 | -0.551941829 |
| 1659 | RPS23   | 6228 | 0.000313489 | -0.537603782 |

|      |          |      |             |              |
|------|----------|------|-------------|--------------|
| 1660 | RPS24    | 6229 | 1.33E-05    | -0.620319833 |
| 1661 | RPS25    | 6230 | 2.64E-05    | -0.604294307 |
| 1662 | RPS26    | 6231 | 0.006098651 | -0.427801658 |
| 1663 | RPS27    | 6232 | 0.002871319 | -0.459541154 |
| 1664 | RPS27A   | 6233 | 0.000174093 | -0.554954664 |
| 1665 | RPS28    | 6234 | 0.000270115 | -0.542083132 |
| 1666 | RPS29    | 6235 | 0.000163116 | -0.556788292 |
| 1667 | RRAS     | 6237 | 0.002871382 | -0.459534997 |
| 1668 | RRBP1    | 6238 | 0.004712648 | -0.439004259 |
| 1669 | RRM1     | 6240 | 0.005726679 | -0.430598168 |
| 1670 | RTKN     | 6242 | 3.23E-06    | -0.650522856 |
| 1671 | RS1      | 6247 | 0.001524035 | 0.483779788  |
| 1672 | RYK      | 6259 | 0.002044484 | -0.472729075 |
| 1673 | S100A3   | 6274 | 7.18E-05    | 0.579175026  |
| 1674 | S100A5   | 6276 | 0.000215244 | 0.548829966  |
| 1675 | S100A7   | 6278 | 0.001301306 | 0.489639     |
| 1676 | S100A13  | 6284 | 0.000593238 | -0.517194517 |
| 1677 | S100B    | 6285 | 0.007683339 | 0.41735622   |
| 1678 | VPS52    | 6293 | 0.00666036  | -0.423954657 |
| 1679 | SAG      | 6295 | 2.01E-05    | 0.610762797  |
| 1680 | MAPK12   | 6300 | 2.82E-08    | 0.732638706  |
| 1681 | SAT1     | 6303 | 0.003278492 | -0.454197776 |
| 1682 | SBF1     | 6305 | 0.003380175 | -0.45293002  |
| 1683 | SC4MOL   | 6307 | 8.62E-05    | -0.57441695  |
| 1684 | ATXN8OS  | 6315 | 5.33E-06    | 0.64026575   |
| 1685 | SERPINB3 | 6317 | 9.81E-07    | 0.673487639  |
| 1686 | SERPINB4 | 6318 | 1.60E-10    | 0.803630052  |
| 1687 | SCN1B    | 6324 | 5.48E-10    | 0.78700245   |
| 1688 | SCN2A    | 6326 | 1.45E-08    | 0.742773863  |
| 1689 | SCN3A    | 6328 | 9.80E-10    | 0.77939112   |
| 1690 | SCN4A    | 6329 | 0.000774697 | 0.508063177  |
| 1691 | SCN5A    | 6331 | 0.005952465 | 0.428858443  |
| 1692 | SCN7A    | 6332 | 0.000908774 | 0.50248329   |
| 1693 | SCN10A   | 6336 | 3.18E-08    | 0.730840831  |
| 1694 | SCNN1A   | 6337 | 0.000926434 | -0.501778952 |
| 1695 | CCL5     | 6352 | 3.17E-06    | 0.650871613  |
| 1696 | CCL13    | 6357 | 3.77E-11    | 0.824253924  |
| 1697 | CCL16    | 6360 | 3.90E-06    | 0.646724151  |
| 1698 | CCL19    | 6363 | 6.01E-06    | 0.637729852  |
| 1699 | CCL22    | 6367 | 1.20E-05    | 0.622710308  |
| 1700 | CCL23    | 6368 | 2.74E-09    | 0.765683006  |
| 1701 | CCL25    | 6370 | 2.11E-07    | 0.700762658  |
| 1702 | XCL1     | 6375 | 2.36E-05    | 0.606931734  |
| 1703 | SDF2     | 6388 | 0.005198458 | -0.434811195 |
| 1704 | SDHA     | 6389 | 0.000178944 | -0.55417944  |

|      |         |      |             |              |
|------|---------|------|-------------|--------------|
| 1705 | SDHC    | 6391 | 0.003923444 | -0.446698008 |
| 1706 | SEC13   | 6396 | 0.002472217 | -0.465526179 |
| 1707 | SEC14L1 | 6397 | 0.000100877 | 0.570210502  |
| 1708 | TRAPPC2 | 6399 | 0.000348295 | -0.534296155 |
| 1709 | SELP    | 6403 | 1.15E-10    | 0.8079243    |
| 1710 | SELPLG  | 6404 | 2.94E-06    | 0.652442568  |
| 1711 | SEMG1   | 6406 | 4.43E-05    | 0.591583366  |
| 1712 | SEMG2   | 6407 | 0.005840543 | 0.429715941  |
| 1713 | SEPW1   | 6415 | 0.001135714 | -0.494498682 |
| 1714 | MAP2K4  | 6416 | 0.001639095 | -0.481079833 |
| 1715 | SET     | 6418 | 0.002108035 | -0.47158325  |
| 1716 | SFRS1   | 6426 | 0.000425027 | -0.528007492 |
| 1717 | SFRS2   | 6427 | 0.000250018 | -0.544390314 |
| 1718 | SFRS3   | 6428 | 6.38E-05    | -0.582250213 |
| 1719 | SFRS5   | 6430 | 0.004982839 | -0.436615238 |
| 1720 | SFRS6   | 6431 | 0.001059629 | -0.496956792 |
| 1721 | SFRS7   | 6432 | 4.52E-05    | -0.591107316 |
| 1722 | SFRS10  | 6434 | 0.001701353 | -0.479689061 |
| 1723 | SFTPC   | 6440 | 1.25E-07    | 0.709405623  |
| 1724 | SGCA    | 6442 | 6.72E-06    | 0.635367854  |
| 1725 | SGCD    | 6444 | 6.85E-06    | 0.634965921  |
| 1726 | SGSH    | 6448 | 0.000112297 | 0.567219188  |
| 1727 | SGTA    | 6449 | 0.004249756 | -0.443413322 |
| 1728 | SH3BGR  | 6450 | 3.73E-11    | 0.824767318  |
| 1729 | ITSN1   | 6453 | 3.14E-08    | 0.731018198  |
| 1730 | SH3GL1  | 6455 | 5.86E-09    | 0.755327981  |
| 1731 | SH3GL3  | 6457 | 1.70E-10    | 0.802562408  |
| 1732 | SHB     | 6461 | 2.12E-05    | 0.609581211  |
| 1733 | SHBG    | 6462 | 1.31E-08    | 0.744177921  |
| 1734 | SHC1    | 6464 | 0.000875944 | -0.503774842 |
| 1735 | FBXW4   | 6468 | 0.00356587  | -0.450752388 |
| 1736 | SI      | 6476 | 0.00016242  | 0.556921497  |
| 1737 | SIAH1   | 6477 | 0.006927804 | -0.422191561 |
| 1738 | ST6GAL1 | 6480 | 0.008382311 | -0.413248655 |
| 1739 | ST3GAL3 | 6487 | 4.85E-08    | 0.724395148  |
| 1740 | SIM1    | 6492 | 0.000327547 | 0.536287036  |
| 1741 | SIM2    | 6493 | 2.06E-11    | 0.834879385  |
| 1742 | SIPA1   | 6494 | 3.16E-10    | 0.794327005  |
| 1743 | SKP1    | 6500 | 0.000235213 | -0.54623309  |
| 1744 | SKP2    | 6502 | 0.00315518  | -0.455780153 |
| 1745 | SLA     | 6503 | 0.007678358 | 0.417386568  |
| 1746 | SLAMF1  | 6504 | 5.26E-11    | 0.819620155  |
| 1747 | SLC1A2  | 6506 | 0.000111245 | 0.567513032  |
| 1748 | SLC1A4  | 6509 | 3.32E-06    | 0.649957546  |
| 1749 | SLC1A7  | 6512 | 1.23E-06    | 0.669348281  |

|      |         |      |             |              |
|------|---------|------|-------------|--------------|
| 1750 | SLC2A2  | 6514 | 3.77E-06    | 0.647445272  |
| 1751 | SLC3A2  | 6520 | 0.008003905 | -0.41549093  |
| 1752 | SLC4A1  | 6521 | 1.86E-06    | 0.661492372  |
| 1753 | SLC4A2  | 6522 | 8.70E-05    | -0.574149538 |
| 1754 | SMTN    | 6525 | 0.006210296 | 0.427012739  |
| 1755 | Unknown | 6526 | 0.000748581 | -0.509282013 |
| 1756 | SLC6A1  | 6529 | 1.56E-08    | 0.741639437  |
| 1757 | SLC6A4  | 6532 | 0.005060949 | 0.435965665  |
| 1758 | SLC6A7  | 6534 | 3.41E-10    | 0.793268948  |
| 1759 | SLC6A12 | 6539 | 9.64E-06    | 0.627475547  |
| 1760 | SLC7A1  | 6541 | 0.002198617 | -0.469986938 |
| 1761 | SLC8A2  | 6543 | 0.001324516 | 0.489030492  |
| 1762 | SLC7A4  | 6545 | 1.18E-10    | 0.807542761  |
| 1763 | SLC8A3  | 6547 | 0.000422195 | 0.528222839  |
| 1764 | SLC9A1  | 6548 | 1.59E-09    | 0.772938869  |
| 1765 | SLC10A1 | 6554 | 1.46E-05    | 0.618129878  |
| 1766 | SLC10A2 | 6555 | 1.09E-06    | 0.671599697  |
| 1767 | SLC12A3 | 6559 | 1.63E-09    | 0.772614118  |
| 1768 | SLC15A2 | 6565 | 1.01E-06    | 0.672958622  |
| 1769 | SLC16A2 | 6567 | 0.002265273 | 0.468835453  |
| 1770 | SLC17A1 | 6568 | 3.60E-06    | 0.648334164  |
| 1771 | SLC34A1 | 6569 | 0.000617315 | 0.51585659   |
| 1772 | SLC18A1 | 6570 | 0.000185481 | 0.55314424   |
| 1773 | SLC19A1 | 6573 | 0.000350256 | 0.534102866  |
| 1774 | SLC20A2 | 6575 | 0.004710348 | 0.439043135  |
| 1775 | SLCO2A1 | 6578 | 4.14E-09    | 0.760207068  |
| 1776 | SLCO1A2 | 6579 | 0.000328779 | 0.536167286  |
| 1777 | SLC22A2 | 6582 | 0.00017219  | 0.555259271  |
| 1778 | SLIT1   | 6585 | 2.08E-08    | 0.737398062  |
| 1779 | SLPI    | 6590 | 0.005097061 | -0.435641307 |
| 1780 | SMARCA4 | 6597 | 0.001941846 | -0.474636227 |
| 1781 | SMARCC2 | 6601 | 1.88E-10    | 0.80125734   |
| 1782 | SMARCD1 | 6602 | 8.16E-11    | 0.812387653  |
| 1783 | SMARCD2 | 6603 | 0.001925983 | -0.47493897  |
| 1784 | SMARCD3 | 6604 | 0.002578854 | -0.463803267 |
| 1785 | SMPD1   | 6609 | 0.000444737 | 0.526555922  |
| 1786 | SUMO2   | 6613 | 2.27E-05    | -0.607897267 |
| 1787 | SNAI1   | 6615 | 1.33E-09    | 0.775315241  |
| 1788 | SNCG    | 6623 | 9.77E-10    | 0.779464794  |
| 1789 | SNRP70  | 6625 | 8.65E-05    | -0.574311439 |
| 1790 | SNRPA   | 6626 | 0.002422839 | -0.466334064 |
| 1791 | SNRPA1  | 6627 | 0.000141949 | -0.560720999 |
| 1792 | SNRPD2  | 6633 | 0.000271919 | -0.541888219 |
| 1793 | SNRPD3  | 6634 | 0.000439477 | -0.52695306  |
| 1794 | SNRPE   | 6635 | 0.003128111 | -0.456142749 |



|      |        |      |             |              |
|------|--------|------|-------------|--------------|
| 1795 | SNRPG  | 6637 | 0.000770368 | -0.508272289 |
| 1796 | SOD1   | 6647 | 3.52E-05    | -0.597264345 |
| 1797 | SOD3   | 6649 | 1.53E-06    | 0.665224526  |
| 1798 | SON    | 6651 | 0.000268102 | -0.54229986  |
| 1799 | SORL1  | 6653 | 0.006504632 | -0.425020746 |
| 1800 | SOS2   | 6655 | 4.92E-08    | 0.724152804  |
| 1801 | SOX4   | 6659 | 0.000654559 | -0.513841048 |
| 1802 | SOX5   | 6660 | 3.75E-11    | 0.824513484  |
| 1803 | SOX9   | 6662 | 0.004033096 | -0.445578144 |
| 1804 | SOX10  | 6663 | 1.01E-10    | 0.80969197   |
| 1805 | SP4    | 6671 | 6.74E-07    | 0.68042129   |
| 1806 | SPAM1  | 6677 | 2.29E-05    | 0.607649408  |
| 1807 | SPAST  | 6683 | 0.003332926 | -0.453501254 |
| 1808 | SPG7   | 6687 | 0.004206914 | -0.443861829 |
| 1809 | SPIB   | 6689 | 3.97E-11    | 0.823472225  |
| 1810 | SPINT1 | 6692 | 0.006445275 | -0.425440878 |
| 1811 | SPN    | 6693 | 6.75E-07    | 0.680390358  |
| 1812 | SPRR1A | 6698 | 9.80E-10    | 0.779392749  |
| 1813 | SPRR2B | 6701 | 8.69E-10    | 0.781212844  |
| 1814 | SPRR2G | 6706 | 0.000502239 | 0.522658904  |
| 1815 | SPTB   | 6710 | 8.03E-11    | 0.812795802  |
| 1816 | SRC    | 6714 | 6.55E-11    | 0.815510461  |
| 1817 | AKR1D1 | 6718 | 0.002506022 | 0.464949656  |
| 1818 | SRP9   | 6726 | 0.007862702 | -0.416324455 |
| 1819 | SRP14  | 6727 | 0.001723637 | -0.479170501 |
| 1820 | SRP19  | 6728 | 0.002926965 | -0.458764957 |
| 1821 | SRP54  | 6729 | 0.000801414 | -0.50691639  |
| 1822 | SRP68  | 6730 | 1.22E-06    | -0.669417495 |
| 1823 | SRP72  | 6731 | 0.000447142 | -0.526377234 |
| 1824 | SRPK2  | 6733 | 0.001733863 | -0.478946666 |
| 1825 | SRY    | 6736 | 3.29E-11    | 0.826416429  |
| 1826 | TROVE2 | 6738 | 0.006724696 | -0.423531139 |
| 1827 | SSB    | 6741 | 0.003980496 | -0.446131132 |
| 1828 | SSR2   | 6746 | 7.89E-06    | -0.631931915 |
| 1829 | SSR3   | 6747 | 0.001073408 | -0.496471468 |
| 1830 | SSR4   | 6748 | 0.000932347 | -0.501530274 |
| 1831 | SSRP1  | 6749 | 0.002882395 | -0.459382398 |
| 1832 | SSX1   | 6756 | 1.08E-09    | 0.778152623  |
| 1833 | SSX5   | 6758 | 1.30E-11    | 0.843899945  |
| 1834 | ST14   | 6768 | 0.001053941 | -0.497149399 |
| 1835 | STAC   | 6769 | 1.61E-11    | 0.83795843   |
| 1836 | STAT2  | 6773 | 0.000645838 | -0.514305704 |
| 1837 | STAT3  | 6774 | 0.000123112 | 0.56463243   |
| 1838 | STAT4  | 6775 | 2.61E-08    | 0.733850632  |
| 1839 | STAT6  | 6778 | 0.000210867 | -0.54944959  |

|      |          |      |             |              |
|------|----------|------|-------------|--------------|
| 1840 | STAU1    | 6780 | 2.98E-05    | -0.601303834 |
| 1841 | SULT1E1  | 6783 | 0.006972112 | 0.421890243  |
| 1842 | ELOVL4   | 6785 | 0.004583956 | 0.44016835   |
| 1843 | NEK4     | 6787 | 0.009047722 | -0.409575627 |
| 1844 | CDKL5    | 6792 | 0.000250299 | 0.544348507  |
| 1845 | AURKC    | 6795 | 8.59E-10    | 0.781346955  |
| 1846 | STX1A    | 6804 | 2.20E-08    | 0.736491412  |
| 1847 | STX3     | 6809 | 1.90E-09    | 0.770500047  |
| 1848 | STXBP3   | 6814 | 0.001657088 | -0.480674404 |
| 1849 | SULT2A1  | 6822 | 3.20E-05    | 0.599653321  |
| 1850 | SUPT5H   | 6829 | 0.008382635 | 0.413242003  |
| 1851 | SUPT6H   | 6830 | 1.10E-06    | 0.671432029  |
| 1852 | ABCC8    | 6833 | 7.87E-10    | 0.782420564  |
| 1853 | SURF1    | 6834 | 0.00122358  | -0.491876476 |
| 1854 | SURF6    | 6838 | 4.57E-05    | -0.59075191  |
| 1855 | SYCP1    | 6847 | 1.18E-08    | 0.745616368  |
| 1856 | T        | 6862 | 5.85E-05    | 0.584441477  |
| 1857 | TACR2    | 6865 | 0.005944332 | 0.428917358  |
| 1858 | TAC3     | 6866 | 3.23E-08    | 0.730553749  |
| 1859 | ADAM17   | 6868 | 0.004358043 | -0.442285786 |
| 1860 | TACR3    | 6870 | 2.06E-05    | 0.610237834  |
| 1861 | TAF2     | 6873 | 0.003113391 | 0.45633265   |
| 1862 | TAF4     | 6874 | 0.000418883 | -0.528452929 |
| 1863 | TAF7     | 6879 | 0.000290931 | -0.539843857 |
| 1864 | TAF11    | 6882 | 0.000878704 | -0.503669297 |
| 1865 | MAP3K7   | 6885 | 0.00528529  | -0.434099293 |
| 1866 | TAL2     | 6887 | 1.49E-11    | 0.84030786   |
| 1867 | TALDO1   | 6888 | 0.000969425 | -0.50014738  |
| 1868 | TAPBP    | 6892 | 0.000911255 | -0.502389983 |
| 1869 | TARBP1   | 6894 | 2.38E-06    | 0.656643758  |
| 1870 | TARBP2   | 6895 | 0.008854876 | 0.41063796   |
| 1871 | TAT      | 6898 | 1.89E-07    | 0.70259381   |
| 1872 | TAZ      | 6901 | 2.03E-08    | 0.73779581   |
| 1873 | TBCA     | 6902 | 0.004948917 | -0.436907603 |
| 1874 | TBCE     | 6905 | 0.009386992 | -0.407819376 |
| 1875 | SERPINA7 | 6906 | 2.25E-05    | 0.608092164  |
| 1876 | TBL1X    | 6907 | 0.002689724 | -0.462102716 |
| 1877 | TBP      | 6908 | 1.06E-07    | 0.712077044  |
| 1878 | TBX5     | 6910 | 0.008100221 | 0.414910012  |
| 1879 | TCEA2    | 6919 | 1.09E-05    | -0.624799311 |
| 1880 | TCEA3    | 6920 | 0.004086835 | -0.445025875 |
| 1881 | TCEB1    | 6921 | 0.007817057 | -0.416582145 |
| 1882 | TCEB2    | 6923 | 0.004430185 | -0.441577288 |
| 1883 | TCEB3    | 6924 | 7.42E-07    | 0.678632176  |
| 1884 | TBX3     | 6926 | 9.16E-09    | 0.749130913  |

|      |         |      |             |              |
|------|---------|------|-------------|--------------|
| 1885 | HNF1B   | 6928 | 9.47E-10    | 0.77996084   |
| 1886 | TCF3    | 6929 | 0.001371867 | -0.487722179 |
| 1887 | TCF7    | 6932 | 0.002077367 | -0.472132985 |
| 1888 | TCF7L2  | 6934 | 0.000776717 | -0.507968946 |
| 1889 | C2orf3  | 6936 | 0.000438373 | 0.527029026  |
| 1890 | TCF12   | 6938 | 0.000478491 | -0.524229964 |
| 1891 | TCF19   | 6941 | 1.12E-05    | 0.624191131  |
| 1892 | VPS72   | 6944 | 0.008901712 | -0.410398141 |
| 1893 | MLX     | 6945 | 3.81E-09    | 0.761380755  |
| 1894 | TCN1    | 6947 | 0.002064725 | 0.472372256  |
| 1895 | TCN2    | 6948 | 0.00531861  | 0.433799794  |
| 1896 | TCOF1   | 6949 | 7.41E-09    | 0.752142405  |
| 1897 | TCP1    | 6950 | 0.005023381 | -0.436286515 |
| 1898 | TECTB   | 6975 | 0.009467115 | 0.407414235  |
| 1899 | PPP1R11 | 6992 | 0.003434473 | -0.452266187 |
| 1900 | DYNLT1  | 6993 | 0.002773361 | -0.460855784 |
| 1901 | TDO2    | 6999 | 0.000629431 | 0.515178533  |
| 1902 | PRDX2   | 7001 | 0.001231002 | -0.491648648 |
| 1903 | TEAD1   | 7003 | 0.002431204 | -0.466191232 |
| 1904 | TEAD3   | 7005 | 0.004030277 | -0.445613723 |
| 1905 | TEGT    | 7009 | 0.003195208 | -0.455246746 |
| 1906 | TEK     | 7010 | 2.71E-08    | 0.733256424  |
| 1907 | TERF1   | 7013 | 0.001889992 | -0.475629024 |
| 1908 | TERT    | 7015 | 5.84E-07    | 0.683046214  |
| 1909 | TFAP4   | 7023 | 2.14E-10    | 0.799492368  |
| 1910 | TFCP2   | 7024 | 1.18E-07    | 0.71035711   |
| 1911 | TFDP1   | 7027 | 0.00444744  | -0.44142633  |
| 1912 | TFDP2   | 7029 | 0.000781159 | -0.507760055 |
| 1913 | TFE3    | 7030 | 3.21E-05    | -0.599528719 |
| 1914 | TGFB3   | 7043 | 1.24E-06    | 0.669193007  |
| 1915 | TGM4    | 7047 | 1.37E-08    | 0.74348685   |
| 1916 | TGIF1   | 7050 | 0.006909641 | -0.422307627 |
| 1917 | TGM3    | 7053 | 3.93E-05    | 0.594545615  |
| 1918 | TH      | 7054 | 0.005624668 | 0.431409585  |
| 1919 | THBS3   | 7059 | 6.43E-07    | 0.681307041  |
| 1920 | THPO    | 7066 | 4.76E-07    | 0.686615074  |
| 1921 | THRSP   | 7069 | 5.89E-10    | 0.786076987  |
| 1922 | TIMP1   | 7076 | 0.002529453 | -0.464609134 |
| 1923 | TIMP4   | 7079 | 0.000349751 | 0.534162439  |
| 1924 | TKT     | 7086 | 0.003565527 | -0.450761121 |
| 1925 | TLE1    | 7088 | 0.001008891 | -0.498723089 |
| 1926 | TLE3    | 7090 | 0.00489164  | -0.437417829 |
| 1927 | TLL1    | 7092 | 2.26E-05    | 0.608026086  |
| 1928 | TLL2    | 7093 | 5.21E-10    | 0.787670352  |
| 1929 | TLOC1   | 7095 | 0.002916344 | -0.458911174 |

|      |         |      |             |              |
|------|---------|------|-------------|--------------|
| 1930 | TLR1    | 7096 | 2.58E-06    | 0.654994892  |
| 1931 | TLR2    | 7097 | 1.22E-09    | 0.776377136  |
| 1932 | TLR4    | 7099 | 4.11E-06    | 0.645616083  |
| 1933 | NR2E1   | 7101 | 2.21E-07    | 0.699956195  |
| 1934 | TM4SF4  | 7104 | 0.007256985 | 0.420045543  |
| 1935 | TMEM1   | 7109 | 0.007634485 | -0.417655467 |
| 1936 | TMF1    | 7110 | 0.004297702 | -0.442898845 |
| 1937 | TMPRSS2 | 7113 | 6.94E-07    | 0.679847043  |
| 1938 | CLEC3B  | 7123 | 0.001152118 | 0.493983512  |
| 1939 | TNF     | 7124 | 2.03E-10    | 0.80022734   |
| 1940 | TNNC2   | 7125 | 0.000158088 | 0.557698203  |
| 1941 | TNP2    | 7142 | 0.000368384 | 0.532474831  |
| 1942 | TOP1    | 7150 | 0.000617904 | -0.515799621 |
| 1943 | TOP2B   | 7155 | 4.26E-06    | -0.644865414 |
| 1944 | TP53BP1 | 7158 | 4.04E-05    | -0.59383399  |
| 1945 | TP53BP2 | 7159 | 0.007337434 | -0.419506497 |
| 1946 | TP73    | 7161 | 2.78E-05    | 0.602952733  |
| 1947 | TPD52   | 7163 | 0.009634006 | -0.406622475 |
| 1948 | TPD52L2 | 7165 | 0.000701853 | -0.511464664 |
| 1949 | TPM3    | 7170 | 0.000311118 | -0.537820118 |
| 1950 | TPO     | 7173 | 0.002606464 | 0.46339576   |
| 1951 | TPP2    | 7174 | 0.003373178 | -0.45302377  |
| 1952 | TPT1    | 7178 | 5.61E-05    | -0.585604306 |
| 1953 | NR2C2   | 7182 | 1.39E-06    | -0.666952833 |
| 1954 | HSP90B1 | 7184 | 0.006221373 | -0.426940288 |
| 1955 | TRAF1   | 7185 | 5.60E-07    | 0.683802182  |
| 1956 | TRAF3   | 7187 | 0.005791333 | 0.430116073  |
| 1957 | TRAF6   | 7189 | 9.94E-06    | 0.62679706   |
| 1958 | TRH     | 7200 | 0.001220635 | 0.491961624  |
| 1959 | TRHR    | 7201 | 7.45E-05    | 0.578204251  |
| 1960 | CCT3    | 7203 | 6.12E-06    | -0.63733575  |
| 1961 | TRIO    | 7204 | 7.66E-06    | 0.632581956  |
| 1962 | TRIP6   | 7205 | 0.000865078 | -0.504228285 |
| 1963 | TRPC3   | 7222 | 0.000155794 | 0.558133792  |
| 1964 | TRPC6   | 7225 | 2.26E-11    | 0.832978793  |
| 1965 | TRPM2   | 7226 | 1.33E-06    | 0.667773885  |
| 1966 | TSN     | 7247 | 0.000384573 | -0.531145829 |
| 1967 | TSG101  | 7251 | 0.000236794 | -0.546037144 |
| 1968 | TSPY1   | 7258 | 3.69E-10    | 0.792234285  |
| 1969 | TSPYL1  | 7259 | 0.00029409  | -0.539530791 |
| 1970 | TST     | 7263 | 0.001472948 | -0.485042674 |
| 1971 | TTC3    | 7267 | 0.000392012 | -0.530571258 |
| 1972 | TTC4    | 7268 | 0.000520898 | -0.521461934 |
| 1973 | TTN     | 7273 | 0.006025419 | 0.428296672  |
| 1974 | TTR     | 7276 | 2.38E-10    | 0.79800044   |

|      |         |      |             |              |
|------|---------|------|-------------|--------------|
| 1975 | TUBA4A  | 7277 | 0.009164687 | -0.408965209 |
| 1976 | TUFM    | 7284 | 0.000143561 | -0.560419935 |
| 1977 | TUFT1   | 7286 | 0.007129224 | -0.420926158 |
| 1978 | TULP2   | 7288 | 0.000199611 | 0.551017845  |
| 1979 | HIRA    | 7290 | 0.004633622 | -0.439745653 |
| 1980 | TYR     | 7299 | 1.34E-10    | 0.805862085  |
| 1981 | TYRO3   | 7301 | 1.14E-06    | 0.670727604  |
| 1982 | TYRO3P  | 7302 | 1.25E-05    | 0.621667787  |
| 1983 | U2AF1   | 7307 | 1.77E-06    | -0.66239263  |
| 1984 | UBA52   | 7311 | 5.28E-06    | -0.640477996 |
| 1985 | UBC     | 7316 | 0.000486682 | -0.523693698 |
| 1986 | UBA1    | 7317 | 2.68E-05    | -0.60385622  |
| 1987 | UBE2D2  | 7322 | 0.001830073 | -0.476879869 |
| 1988 | UBE2D3  | 7323 | 0.002695648 | -0.46200094  |
| 1989 | UBE2E1  | 7324 | 9.44E-06    | -0.627954017 |
| 1990 | UBE2E2  | 7325 | 0.002181504 | -0.470288078 |
| 1991 | UBE2G1  | 7326 | 0.008485897 | -0.41264219  |
| 1992 | UBE2G2  | 7327 | 0.004851576 | -0.437797427 |
| 1993 | UBE2H   | 7328 | 0.001870059 | -0.476034588 |
| 1994 | UBE2I   | 7329 | 0.006846967 | -0.422718472 |
| 1995 | UBE3A   | 7337 | 0.001355991 | -0.488193782 |
| 1996 | SUMO1   | 7341 | 0.006914967 | -0.422267741 |
| 1997 | UBP1    | 7342 | 9.42E-08    | -0.713927502 |
| 1998 | UBTF    | 7343 | 0.000121372 | -0.565046394 |
| 1999 | UCHL3   | 7347 | 0.004371863 | -0.442148367 |
| 2000 | UCP2    | 7351 | 0.005584892 | -0.431710371 |
| 2001 | UCP3    | 7352 | 0.000179034 | 0.554160516  |
| 2002 | SLC35A2 | 7355 | 0.004029988 | -0.445621592 |
| 2003 | SCGB1A1 | 7356 | 0.000280209 | 0.540998155  |
| 2004 | UGCG    | 7357 | 0.006705236 | -0.423657214 |
| 2005 | UMOD    | 7369 | 1.68E-06    | 0.663335769  |
| 2006 | UCK2    | 7371 | 7.00E-05    | 0.579813612  |
| 2007 | UMPS    | 7372 | 1.47E-08    | 0.742523347  |
| 2008 | UQCRB   | 7381 | 0.002685526 | -0.462186616 |
| 2009 | UQCRC1  | 7384 | 0.000464435 | -0.525220706 |
| 2010 | UQCRC2  | 7385 | 2.51E-05    | -0.605427382 |
| 2011 | UROD    | 7389 | 0.000301263 | -0.538787882 |
| 2012 | UROS    | 7390 | 0.001719381 | -0.479272264 |
| 2013 | USF2    | 7392 | 1.95E-06    | 0.660538162  |
| 2014 | USH2A   | 7399 | 5.81E-05    | 0.58466071   |
| 2015 | CLRN1   | 7401 | 1.59E-11    | 0.838624587  |
| 2016 | UTRN    | 7402 | 0.003694075 | -0.449263673 |
| 2017 | UTX     | 7403 | 0.000905822 | -0.502618241 |
| 2018 | VAV2    | 7410 | 1.85E-05    | 0.612688864  |
| 2019 | VCL     | 7414 | 0.007400429 | -0.419119499 |

|      |         |      |             |              |
|------|---------|------|-------------|--------------|
| 2020 | VDAC2   | 7417 | 0.002470923 | -0.465560142 |
| 2021 | VDAC3   | 7419 | 0.001740503 | -0.478784707 |
| 2022 | VEGFB   | 7423 | 0.001945488 | -0.47456403  |
| 2023 | VHL     | 7428 | 9.08E-08    | 0.71447902   |
| 2024 | VIL1    | 7429 | 1.04E-07    | 0.712287908  |
| 2025 | VIP     | 7432 | 2.48E-08    | 0.734610807  |
| 2026 | VIPR2   | 7434 | 3.37E-06    | 0.649655303  |
| 2027 | VRK2    | 7444 | 0.007595786 | -0.417899067 |
| 2028 | VSNL1   | 7447 | 0.000513386 | 0.521938119  |
| 2029 | VWF     | 7450 | 2.64E-10    | 0.796637345  |
| 2030 | WAS     | 7454 | 0.000107477 | 0.568486748  |
| 2031 | EIF4H   | 7458 | 0.000183147 | -0.553499281 |
| 2032 | WHSC2   | 7469 | 0.003660364 | -0.449634386 |
| 2033 | WNT1    | 7471 | 0.001092387 | 0.495861867  |
| 2034 | WNT6    | 7475 | 9.58E-10    | 0.779789861  |
| 2035 | WNT10B  | 7480 | 5.59E-06    | 0.639242266  |
| 2036 | WNT11   | 7481 | 0.00042435  | 0.52806685   |
| 2037 | WNT2B   | 7482 | 0.000152682 | 0.558703464  |
| 2038 | WT1     | 7490 | 3.68E-05    | -0.596203781 |
| 2039 | XBP1    | 7494 | 0.000773939 | -0.508097853 |
| 2040 | XDH     | 7498 | 6.11E-10    | 0.785570024  |
| 2041 | XIST    | 7503 | 0.003295903 | -0.453975996 |
| 2042 | XPC     | 7508 | 0.000396618 | -0.530207582 |
| 2043 | XPNPEP1 | 7511 | 0.000233544 | -0.546450303 |
| 2044 | XPNPEP2 | 7512 | 6.08E-06    | 0.637489206  |
| 2045 | XPO1    | 7514 | 1.73E-06    | -0.662823292 |
| 2046 | XRCC5   | 7520 | 0.001078767 | -0.496290894 |
| 2047 | YY1     | 7528 | 0.001328866 | -0.488911067 |
| 2048 | YWHAB   | 7529 | 0.000630393 | -0.515121184 |
| 2049 | YWHAE   | 7531 | 0.000331151 | -0.535942446 |
| 2050 | YWHAG   | 7532 | 0.001184916 | -0.493010362 |
| 2051 | ZAP70   | 7535 | 0.002898846 | 0.459155147  |
| 2052 | SF1     | 7536 | 0.003060809 | -0.457028233 |
| 2053 | ZFP37   | 7539 | 2.38E-10    | 0.797907064  |
| 2054 | ZFY     | 7544 | 1.67E-09    | 0.772350323  |
| 2055 | ZNF8    | 7554 | 3.05E-05    | 0.600738098  |
| 2056 | ZNF12   | 7559 | 5.75E-05    | -0.584920929 |
| 2057 | Unknown | 7567 | 6.35E-11    | 0.815889584  |
| 2058 | ZNF22   | 7570 | 0.003145924 | -0.455908711 |
| 2059 | ZNF24   | 7572 | 0.004684029 | -0.439294451 |
| 2060 | Unknown | 7577 | 0.00048293  | 0.523928972  |
| 2061 | ZSCAN20 | 7579 | 3.75E-10    | 0.792027415  |
| 2062 | ZNF32   | 7580 | 0.00133335  | -0.488794447 |
| 2063 | ZNF33A  | 7581 | 0.000600248 | -0.516792462 |
| 2064 | ZNF35   | 7584 | 3.88E-10    | 0.791536903  |

|      |          |      |             |              |
|------|----------|------|-------------|--------------|
| 2065 | ZKSCAN1  | 7586 | 0.003976815 | -0.446169401 |
| 2066 | ZNF37A   | 7587 | 0.005995584 | -0.42851469  |
| 2067 | ZNF76    | 7629 | 0.000136193 | -0.561872664 |
| 2068 | ZNF80    | 7634 | 0.005115725 | -0.435496414 |
| 2069 | ZNF85    | 7639 | 0.008134473 | -0.414677965 |
| 2070 | ZNF90    | 7643 | 3.18E-07    | 0.693695941  |
| 2071 | ZNF124   | 7678 | 0.002080213 | 0.472082423  |
| 2072 | MKRN3    | 7681 | 0.000337691 | 0.535306299  |
| 2073 | ZNF132   | 7691 | 7.11E-06    | 0.634147769  |
| 2074 | ZNF143   | 7702 | 0.001775611 | -0.478029324 |
| 2075 | PCGF2    | 7703 | 0.005418041 | -0.432988416 |
| 2076 | ZNF146   | 7705 | 0.001001241 | -0.499007841 |
| 2077 | TRIM25   | 7706 | 1.81E-08    | 0.739473303  |
| 2078 | ZBTB17   | 7709 | 0.003894053 | -0.447029039 |
| 2079 | ZNF154   | 7710 | 8.48E-09    | 0.750202504  |
| 2080 | VEZF1    | 7716 | 0.001161471 | -0.493694836 |
| 2081 | ZNF174   | 7727 | 0.008539672 | -0.412337998 |
| 2082 | ZNF179   | 7732 | 9.66E-05    | 0.57134472   |
| 2083 | ZNF187   | 7741 | 5.86E-09    | 0.755377111  |
| 2084 | ZNF189   | 7743 | 1.32E-09    | 0.775392402  |
| 2085 | ZNF193   | 7746 | 0.003739635 | 0.448760892  |
| 2086 | ZMYM2    | 7750 | 0.000158881 | -0.557559296 |
| 2087 | ZNF202   | 7753 | 9.77E-10    | 0.779481927  |
| 2088 | ZNF204   | 7754 | 0.002881758 | 0.459395371  |
| 2089 | ZNF207   | 7756 | 0.000525614 | -0.521147258 |
| 2090 | ZFAND5   | 7763 | 9.72E-05    | -0.571190156 |
| 2091 | ZNF217   | 7764 | 0.000169735 | -0.555674006 |
| 2092 | ZNF230   | 7773 | 0.005869184 | 0.429475332  |
| 2093 | SLC30A1  | 7779 | 0.001639738 | -0.481056177 |
| 2094 | ZP2      | 7783 | 5.90E-07    | 0.682868509  |
| 2095 | LUZP1    | 7798 | 0.000896357 | -0.503016518 |
| 2096 | BSND     | 7809 | 3.37E-11    | 0.826052049  |
| 2097 | CSDE1    | 7812 | 0.001190828 | -0.492811422 |
| 2098 | DAP3     | 7818 | 2.15E-05    | -0.609208562 |
| 2099 | NPHS2    | 7827 | 6.25E-08    | 0.720383652  |
| 2100 | GCS1     | 7841 | 0.000445048 | -0.526523037 |
| 2101 | RNF103   | 7844 | 6.62E-06    | -0.635708436 |
| 2102 | PAX8     | 7849 | 0.005447524 | -0.432734831 |
| 2103 | BRPF1    | 7862 | 0.000750347 | 0.50920109   |
| 2104 | IFRD2    | 7866 | 0.001368382 | 0.487818849  |
| 2105 | MAPKAPK3 | 7867 | 9.10E-09    | 0.74923751   |
| 2106 | SLMAP    | 7871 | 0.003129811 | -0.456113183 |
| 2107 | USP7     | 7874 | 0.001562755 | -0.48283163  |
| 2108 | ALDH5A1  | 7915 | 0.003038719 | -0.457304737 |
| 2109 | BAT2     | 7916 | 0.002549921 | -0.464272198 |

|      |          |      |             |              |
|------|----------|------|-------------|--------------|
| 2110 | BAT3     | 7917 | 0.001355991 | -0.48818276  |
| 2111 | BAT5     | 7920 | 0.000295913 | -0.539353301 |
| 2112 | LST1     | 7940 | 8.17E-06    | 0.631170511  |
| 2113 | TFEB     | 7942 | 3.03E-09    | 0.764448608  |
| 2114 | EPM2A    | 7957 | 2.02E-07    | 0.701471201  |
| 2115 | JTV1     | 7965 | 0.00243657  | -0.466095473 |
| 2116 | MAFK     | 7975 | 0.003387566 | -0.452821611 |
| 2117 | SHFM1    | 7979 | 0.002286533 | -0.468470013 |
| 2118 | ARHGEF5  | 7984 | 0.002385699 | -0.466927715 |
| 2119 | ZNF212   | 7988 | 0.001216889 | -0.492062519 |
| 2120 | MYST3    | 7994 | 0.002275929 | -0.468652028 |
| 2121 | GLRA3    | 8001 | 0.000995566 | 0.499206135  |
| 2122 | BRD3     | 8019 | 0.001032795 | -0.497886177 |
| 2123 | LHX3     | 8022 | 2.78E-10    | 0.795899464  |
| 2124 | MLLT10   | 8028 | 1.93E-07    | 0.702240931  |
| 2125 | CUBN     | 8029 | 1.30E-11    | 0.84433756   |
| 2126 | NCOA4    | 8031 | 0.002130094 | -0.471191536 |
| 2127 | SHOC2    | 8036 | 0.006739242 | -0.423433136 |
| 2128 | RASSF7   | 8045 | 0.000330565 | -0.535996469 |
| 2129 | PTP4A2   | 8073 | 7.50E-05    | -0.578041968 |
| 2130 | FGF23    | 8074 | 0.001375336 | 0.487609231  |
| 2131 | MLF2     | 8079 | 0.002425403 | -0.466293157 |
| 2132 | AAAS     | 8086 | 1.25E-06    | 0.669074164  |
| 2133 | FXR1     | 8087 | 0.002692635 | -0.462049744 |
| 2134 | CDK2AP1  | 8099 | 0.002594068 | -0.46357862  |
| 2135 | IFT88    | 8100 | 0.007660913 | 0.41750586   |
| 2136 | PABPN1   | 8106 | 0.000268215 | -0.5422826   |
| 2137 | DPF3     | 8110 | 1.08E-10    | 0.808698434  |
| 2138 | GPR68    | 8111 | 0.000284922 | 0.5404803    |
| 2139 | TCL1A    | 8115 | 6.35E-11    | 0.815955158  |
| 2140 | ANP32A   | 8125 | 0.002537609 | -0.464457111 |
| 2141 | C16orf35 | 8131 | 2.40E-05    | 0.606573767  |
| 2142 | AKAP1    | 8165 | 0.000492534 | -0.523303913 |
| 2143 | SLC14A2  | 8170 | 7.12E-07    | 0.679372595  |
| 2144 | MADCAM1  | 8174 | 0.000169007 | 0.555808075  |
| 2145 | SF3A2    | 8175 | 1.90E-09    | 0.770522617  |
| 2146 | ELL      | 8178 | 1.39E-07    | 0.707738078  |
| 2147 | MKKS     | 8195 | 0.001244343 | -0.491252084 |
| 2148 | C21orf33 | 8209 | 4.51E-07    | -0.687566686 |
| 2149 | LZTR1    | 8216 | 4.28E-07    | 0.688528183  |
| 2150 | CLTCL1   | 8218 | 2.82E-10    | 0.795659837  |
| 2151 | DGCR14   | 8220 | 0.006277376 | -0.426565442 |
| 2152 | HDHD1A   | 8226 | 0.008862868 | -0.410597095 |
| 2153 | USP11    | 8237 | 0.008867658 | -0.410570561 |
| 2154 | RBM10    | 8241 | 9.60E-07    | -0.673897113 |



|      |           |      |             |              |
|------|-----------|------|-------------|--------------|
| 2155 | JARID1C   | 8242 | 2.49E-06    | 0.655723701  |
| 2156 | SMC1A     | 8243 | 0.002233184 | -0.469391483 |
| 2157 | ARD1A     | 8260 | 0.004761291 | -0.438582869 |
| 2158 | JARID1D   | 8284 | 1.71E-05    | 0.614551017  |
| 2159 | USP9Y     | 8287 | 0.000122654 | 0.564749561  |
| 2160 | EPX       | 8288 | 3.44E-05    | 0.597889641  |
| 2161 | ARID1A    | 8289 | 0.00186567  | -0.47612201  |
| 2162 | HIST3H3   | 8290 | 0.001127412 | -0.494769076 |
| 2163 | TRRAP     | 8295 | 0.000859537 | -0.504443051 |
| 2164 | PICALM    | 8301 | 0.000224893 | -0.547559412 |
| 2165 | AXIN1     | 8312 | 0.00261697  | 0.463238005  |
| 2166 | BAP1      | 8314 | 0.001322844 | -0.489081231 |
| 2167 | FZD8      | 8325 | 2.55E-06    | 0.655223003  |
| 2168 | FZD9      | 8326 | 0.003909273 | 0.446858531  |
| 2169 | HIST1H2AK | 8330 | 8.97E-05    | 0.573359506  |
| 2170 | HIST1H2BL | 8340 | 0.004186839 | 0.444049229  |
| 2171 | HIST1H2BF | 8343 | 6.87E-07    | 0.680079989  |
| 2172 | HIST1H2BH | 8345 | 3.15E-09    | 0.763864866  |
| 2173 | HIST1H3J  | 8356 | 5.77E-07    | 0.683273855  |
| 2174 | HIST1H4F  | 8361 | 0.000995056 | 0.499238756  |
| 2175 | HIST1H4C  | 8364 | 0.002315096 | -0.468030657 |
| 2176 | HYAL3     | 8372 | 0.009093075 | -0.409333602 |
| 2177 | OR1A1     | 8383 | 5.61E-09    | 0.755977744  |
| 2178 | OR1E1     | 8387 | 3.54E-10    | 0.792829501  |
| 2179 | OR1G1     | 8390 | 0.002139593 | 0.47103364   |
| 2180 | PIP5K1A   | 8394 | 0.000317821 | 0.537174381  |
| 2181 | PIP4K2B   | 8396 | 0.000951114 | -0.500792633 |
| 2182 | PLA2G6    | 8398 | 0.000107137 | 0.568570128  |
| 2183 | SPOP      | 8405 | 0.000690215 | -0.512024716 |
| 2184 | TAGLN2    | 8407 | 0.008317635 | -0.413666038 |
| 2185 | ULK1      | 8408 | 0.00898591  | -0.409922288 |
| 2186 | UXT       | 8409 | 0.000488587 | -0.523577918 |
| 2187 | EEA1      | 8411 | 0.008070299 | -0.415097319 |
| 2188 | STX7      | 8417 | 0.008498291 | -0.412555919 |
| 2189 | BBOX1     | 8424 | 5.27E-08    | 0.723074498  |
| 2190 | SOAT2     | 8435 | 6.12E-11    | 0.816903703  |
| 2191 | NCK2      | 8440 | 0.00018054  | -0.553915454 |
| 2192 | GNPAT     | 8443 | 8.31E-05    | -0.575384832 |
| 2193 | DYRK3     | 8444 | 4.46E-06    | 0.643937529  |
| 2194 | DUSP11    | 8446 | 0.001442744 | -0.485833874 |
| 2195 | CUL4A     | 8451 | 0.000228757 | -0.547059394 |
| 2196 | CUL3      | 8452 | 4.57E-05    | -0.590753193 |
| 2197 | FOXN1     | 8456 | 0.003200444 | 0.455184631  |
| 2198 | IRS4      | 8471 | 2.93E-08    | 0.732073601  |
| 2199 | OGT       | 8473 | 0.00645716  | -0.425355964 |

|      |          |      |             |              |
|------|----------|------|-------------|--------------|
| 2200 | RAE1     | 8480 | 0.002117424 | -0.471410354 |
| 2201 | SEMA7A   | 8482 | 3.64E-08    | 0.728720744  |
| 2202 | PRSS12   | 8492 | 2.11E-07    | 0.700714725  |
| 2203 | PPFIBP2  | 8495 | 0.000383505 | -0.531240252 |
| 2204 | CNTNAP1  | 8506 | 0.001727142 | 0.479088442  |
| 2205 | NIPSNAP1 | 8508 | 0.000213339 | 0.549122569  |
| 2206 | NDST2    | 8509 | 0.000775546 | -0.508019236 |
| 2207 | KCNAB2   | 8514 | 3.45E-07    | 0.692342346  |
| 2208 | IKBKG    | 8517 | 0.00985974  | 0.405483253  |
| 2209 | IKBKAP   | 8518 | 2.15E-05    | -0.609216696 |
| 2210 | Unknown  | 8519 | 0.000454171 | -0.525898881 |
| 2211 | GAS7     | 8522 | 1.07E-06    | 0.671906208  |
| 2212 | CYP4F2   | 8529 | 1.62E-06    | 0.664070598  |
| 2213 | CSDA     | 8531 | 0.007244173 | -0.420165481 |
| 2214 | BCAS1    | 8537 | 0.000720718 | 0.510514183  |
| 2215 | API5     | 8539 | 1.93E-05    | -0.611694721 |
| 2216 | CGGBP1   | 8545 | 2.63E-05    | -0.604305458 |
| 2217 | AP3B1    | 8546 | 4.43E-11    | 0.821815067  |
| 2218 | CDK10    | 8558 | 0.009887456 | -0.405348231 |
| 2219 | DENR     | 8562 | 0.001412434 | -0.486581757 |
| 2220 | THOC5    | 8563 | 0.000527151 | -0.521047121 |
| 2221 | Unknown  | 8564 | 1.78E-11    | 0.837093204  |
| 2222 | YARS     | 8565 | 1.85E-08    | 0.739165949  |
| 2223 | PDXK     | 8566 | 0.001151778 | -0.49399825  |
| 2224 | RRP1     | 8568 | 0.001639855 | -0.481048354 |
| 2225 | AKR7A2   | 8574 | 0.004307191 | -0.44280892  |
| 2226 | PRKRA    | 8575 | 0.000850259 | -0.504835745 |
| 2227 | STK16    | 8576 | 0.000404083 | 0.52959735   |
| 2228 | OR6A2    | 8590 | 6.04E-07    | 0.682438174  |
| 2229 | NOL14    | 8602 | 0.001190084 | -0.492836382 |
| 2230 | C4orf8   | 8603 | 0.00315537  | -0.45577267  |
| 2231 | PLA2G4C  | 8605 | 2.23E-06    | 0.657935603  |
| 2232 | RDH16    | 8608 | 0.000222185 | 0.547930663  |
| 2233 | USO1     | 8615 | 6.33E-08    | 0.720139583  |
| 2234 | NPFF     | 8620 | 6.01E-11    | 0.817250226  |
| 2235 | CDC2L5   | 8621 | 0.007602637 | -0.417853778 |
| 2236 | ASMTL    | 8623 | 0.009724438 | -0.406166    |
| 2237 | RFXANK   | 8625 | 0.000239721 | -0.545698851 |
| 2238 | TP63     | 8626 | 8.75E-07    | 0.675603557  |
| 2239 | JRK      | 8629 | 0.00060957  | 0.516290698  |
| 2240 | DNAH17   | 8632 | 0.000762477 | 0.508665382  |
| 2241 | UNC5C    | 8633 | 2.21E-07    | 0.699917944  |
| 2242 | RTCD1    | 8634 | 0.001334838 | -0.488742685 |
| 2243 | RNASET2  | 8635 | 0.005588918 | -0.431678324 |
| 2244 | DCHS1    | 8642 | 8.39E-06    | 0.63058321   |

|      |           |      |             |              |
|------|-----------|------|-------------|--------------|
| 2245 | PTCH2     | 8643 | 0.000222584 | 0.547871634  |
| 2246 | CHRD      | 8646 | 3.06E-09    | 0.764305507  |
| 2247 | MAP2K1IP1 | 8649 | 0.003177163 | -0.455464441 |
| 2248 | PDE5A     | 8654 | 8.96E-10    | 0.780799374  |
| 2249 | DYNLL1    | 8655 | 0.000871542 | -0.503954176 |
| 2250 | EIF3A     | 8661 | 0.001268904 | -0.490520493 |
| 2251 | EIF3B     | 8662 | 2.61E-05    | -0.604528276 |
| 2252 | EIF3D     | 8664 | 6.47E-06    | -0.636175028 |
| 2253 | EIF3F     | 8665 | 0.000249491 | -0.544476667 |
| 2254 | EIF3G     | 8666 | 0.007723724 | -0.41711642  |
| 2255 | EIF3H     | 8667 | 0.000667939 | -0.513107597 |
| 2256 | EIF3I     | 8668 | 0.001875971 | -0.475920892 |
| 2257 | SLC4A4    | 8671 | 0.006770391 | 0.423226004  |
| 2258 | EIF4G3    | 8672 | 0.008122569 | -0.414771314 |
| 2259 | VAMP8     | 8673 | 0.003095618 | -0.456589664 |
| 2260 | VAMP4     | 8674 | 5.43E-10    | 0.787165123  |
| 2261 | STX11     | 8676 | 0.002027912 | 0.473029308  |
| 2262 | STX10     | 8677 | 0.000140461 | 0.561021862  |
| 2263 | BECN1     | 8678 | 0.001878883 | -0.475853937 |
| 2264 | KRT38     | 8687 | 1.19E-09    | 0.776829241  |
| 2265 | HYAL2     | 8692 | 0.000554004 | -0.51943377  |
| 2266 | DGAT1     | 8694 | 0.005840543 | -0.429718558 |
| 2267 | B4GALT3   | 8703 | 0.000328919 | 0.536137476  |
| 2268 | B3GALT1   | 8708 | 6.36E-07    | 0.681505468  |
| 2269 | SERPINB7  | 8710 | 7.65E-10    | 0.782821454  |
| 2270 | MBTPS1    | 8720 | 0.001095298 | -0.495763171 |
| 2271 | EDF1      | 8721 | 0.000109993 | -0.567858878 |
| 2272 | EED       | 8726 | 0.000272946 | -0.541782027 |
| 2273 | RNMT      | 8731 | 0.0010635   | -0.496817129 |
| 2274 | GPAA1     | 8733 | 0.000247199 | -0.544744155 |
| 2275 | RIPK1     | 8737 | 5.88E-07    | 0.682911903  |
| 2276 | CRADD     | 8738 | 3.26E-10    | 0.793856649  |
| 2277 | ADAM21    | 8747 | 7.95E-06    | 0.631774932  |
| 2278 | ADAM20    | 8748 | 1.25E-05    | 0.621742909  |
| 2279 | ADAM7     | 8756 | 0.000811706 | 0.506445768  |
| 2280 | PABPC4    | 8761 | 4.72E-06    | -0.642778273 |
| 2281 | CD164     | 8763 | 0.002367096 | -0.46726053  |
| 2282 | RAB11A    | 8766 | 0.004714806 | -0.438977042 |
| 2283 | SNAP23    | 8773 | 0.00064133  | -0.514520026 |
| 2284 | MTMR1     | 8776 | 0.003312068 | -0.45378428  |
| 2285 | SIGLEC5   | 8778 | 0.007138324 | 0.420845961  |
| 2286 | RIOK3     | 8780 | 0.00426758  | -0.44320996  |
| 2287 | RGS11     | 8786 | 3.60E-11    | 0.825231881  |
| 2288 | FBP2      | 8789 | 0.000227947 | 0.547170537  |
| 2289 | TNFRSF11A | 8792 | 1.09E-08    | 0.746640737  |

|      |           |      |             |              |
|------|-----------|------|-------------|--------------|
| 2290 | SUCLG1    | 8802 | 1.21E-07    | -0.709958826 |
| 2291 | CREG1     | 8804 | 0.003087151 | -0.45670036  |
| 2292 | TRIM24    | 8805 | 0.000806275 | -0.506719957 |
| 2293 | IL18RAP   | 8807 | 0.001114815 | 0.495160778  |
| 2294 | IL1RL2    | 8808 | 0.00064823  | 0.514181106  |
| 2295 | IL18R1    | 8809 | 1.79E-10    | 0.801856178  |
| 2296 | CDKL1     | 8814 | 0.000921655 | 0.501951628  |
| 2297 | BANF1     | 8815 | 0.000192134 | -0.552134746 |
| 2298 | FGF18     | 8817 | 0.006013834 | -0.428374196 |
| 2299 | SAP30     | 8819 | 0.000251298 | 0.544225108  |
| 2300 | HESX1     | 8820 | 6.98E-07    | 0.679731702  |
| 2301 | FGF16     | 8823 | 4.25E-10    | 0.790321938  |
| 2302 | LIN7A     | 8825 | 2.54E-10    | 0.797108698  |
| 2303 | CD84      | 8832 | 9.93E-06    | 0.62681834   |
| 2304 | SOCS2     | 8835 | 0.005410273 | 0.433046811  |
| 2305 | WISP1     | 8840 | 2.73E-07    | 0.696299923  |
| 2306 | ALKBH1    | 8846 | 2.82E-08    | 0.732675327  |
| 2307 | TSC22D1   | 8848 | 0.002623167 | -0.463130688 |
| 2308 | CDK5R1    | 8851 | 3.28E-10    | 0.793784833  |
| 2309 | DDEF2     | 8853 | 0.003171149 | -0.45555157  |
| 2310 | STK19     | 8859 | 0.001562755 | -0.482831304 |
| 2311 | PER3      | 8863 | 4.97E-09    | 0.757600181  |
| 2312 | VNN2      | 8875 | 1.56E-10    | 0.803899932  |
| 2313 | SQSTM1    | 8878 | 0.000555646 | -0.519337642 |
| 2314 | SGPL1     | 8879 | 0.004048158 | -0.445407947 |
| 2315 | APPBP1    | 8883 | 0.001738399 | -0.478851356 |
| 2316 | SLC5A6    | 8884 | 2.77E-08    | 0.732937834  |
| 2317 | DDX18     | 8886 | 2.88E-06    | 0.652829487  |
| 2318 | TAX1BP1   | 8887 | 0.000348295 | -0.534288025 |
| 2319 | MCM3AP    | 8888 | 0.007254494 | -0.420082667 |
| 2320 | BUD31     | 8896 | 0.005646809 | -0.431242323 |
| 2321 | MTMR3     | 8897 | 6.44E-09    | 0.754074743  |
| 2322 | PRPF4B    | 8899 | 0.001408519 | -0.486702726 |
| 2323 | CPNE1     | 8904 | 0.001541546 | -0.483372027 |
| 2324 | HERC3     | 8916 | 0.000916944 | 0.502151458  |
| 2325 | HERC2     | 8924 | 0.001089936 | -0.495941757 |
| 2326 | BSN       | 8927 | 5.95E-05    | 0.584008898  |
| 2327 | FOXH1     | 8928 | 9.96E-11    | 0.809858553  |
| 2328 | MBD4      | 8930 | 0.001544137 | -0.483296343 |
| 2329 | RAB7L1    | 8934 | 7.07E-07    | 0.679492303  |
| 2330 | AP3D1     | 8943 | 8.88E-06    | -0.629304185 |
| 2331 | BTRC      | 8945 | 0.001719036 | 0.479284249  |
| 2332 | HIST1H2AG | 8969 | 0.003329054 | 0.45356322   |
| 2333 | HIFX      | 8971 | 0.000345795 | -0.534555917 |
| 2334 | CHRNA6    | 8973 | 0.005362628 | 0.433405777  |

|      |          |      |             |              |
|------|----------|------|-------------|--------------|
| 2335 | P4HA2    | 8974 | 0.002686475 | -0.462165419 |
| 2336 | USP13    | 8975 | 0.001783072 | 0.477860603  |
| 2337 | WASL     | 8976 | 0.003272556 | -0.45427152  |
| 2338 | STBD1    | 8987 | 0.007747676 | 0.416985742  |
| 2339 | TRPA1    | 8989 | 1.58E-08    | 0.74141152   |
| 2340 | SELENBP1 | 8991 | 0.001240768 | -0.491369596 |
| 2341 | ATP6V0E1 | 8992 | 0.001665792 | -0.48048164  |
| 2342 | LIMD1    | 8994 | 3.02E-08    | 0.731574442  |
| 2343 | TNFSF18  | 8995 | 4.39E-05    | 0.591778827  |
| 2344 | F2RL3    | 9002 | 2.27E-06    | 0.657573734  |
| 2345 | TAF1C    | 9013 | 2.86E-06    | 0.652985673  |
| 2346 | CH25H    | 9023 | 0.001540455 | 0.483405697  |
| 2347 | BRSK2    | 9024 | 1.49E-06    | 0.665692735  |
| 2348 | RNF8     | 9025 | 0.003387316 | -0.452829552 |
| 2349 | BAZ1B    | 9031 | 6.50E-07    | 0.681093686  |
| 2350 | UBA3     | 9039 | 8.32E-08    | -0.715926506 |
| 2351 | UBE2M    | 9040 | 6.35E-11    | 0.815917084  |
| 2352 | RPL14    | 9045 | 2.05E-06    | -0.659633508 |
| 2353 | DOK2     | 9046 | 8.35E-08    | 0.715852519  |
| 2354 | ARTN     | 9048 | 9.96E-11    | 0.809841906  |
| 2355 | MAP7     | 9053 | 0.002629153 | -0.463031975 |
| 2356 | NFS1     | 9054 | 0.002685526 | -0.462182838 |
| 2357 | SLC7A7   | 9056 | 1.35E-05    | 0.619854191  |
| 2358 | PAPSS1   | 9061 | 5.47E-05    | -0.586273993 |
| 2359 | SYT7     | 9066 | 7.14E-08    | 0.718282095  |
| 2360 | Unknown  | 9069 | 0.000602688 | -0.516664177 |
| 2361 | PRY      | 9081 | 0.000933247 | 0.50149018   |
| 2362 | Unknown  | 9083 | 3.84E-06    | 0.647062442  |
| 2363 | EIF1AY   | 9086 | 0.000402845 | 0.529693978  |
| 2364 | DNAJA3   | 9093 | 0.001391498 | -0.487191674 |
| 2365 | UNC119   | 9094 | 0.000354826 | -0.533700324 |
| 2366 | TBX18    | 9096 | 6.30E-07    | 0.681659252  |
| 2367 | USP8     | 9101 | 0.008373555 | -0.413305149 |
| 2368 | FCGR2C   | 9103 | 0.003944513 | 0.446491592  |
| 2369 | MTMR7    | 9108 | 9.29E-09    | 0.748929391  |
| 2370 | MTMR4    | 9110 | 0.000240185 | -0.545617224 |
| 2371 | MTA1     | 9112 | 0.001075848 | -0.496385085 |
| 2372 | LATS1    | 9113 | 2.68E-07    | 0.69659767   |
| 2373 | INA      | 9118 | 0.000542807 | 0.520115434  |
| 2374 | KRT75    | 9119 | 3.95E-10    | 0.791335129  |
| 2375 | FAM50A   | 9130 | 0.001109313 | -0.495328681 |
| 2376 | AIFM1    | 9131 | 0.000631685 | 0.51502831   |
| 2377 | RRP9     | 9136 | 0.003023156 | -0.457493959 |
| 2378 | CXorf1   | 9142 | 0.007611163 | 0.417799978  |
| 2379 | SYNGR2   | 9144 | 0.008329695 | -0.413603998 |

|      |          |      |             |              |
|------|----------|------|-------------|--------------|
| 2380 | HGS      | 9146 | 0.004415444 | -0.441745181 |
| 2381 | SDCCAG1  | 9147 | 0.003992807 | -0.4460105   |
| 2382 | CTDP1    | 9150 | 0.008552846 | -0.412260721 |
| 2383 | SLC28A1  | 9154 | 9.47E-06    | 0.627885658  |
| 2384 | FIBP     | 9158 | 0.001375243 | -0.487616959 |
| 2385 | PCSK7    | 9159 | 0.002433727 | 0.466151002  |
| 2386 | DGKI     | 9162 | 2.05E-05    | 0.610296371  |
| 2387 | EBAG9    | 9166 | 0.002413022 | -0.466491925 |
| 2388 | TMSB10   | 9168 | 0.007880249 | -0.416216961 |
| 2389 | SFRS2IP  | 9169 | 4.55E-05    | -0.590880233 |
| 2390 | EDG4     | 9170 | 8.00E-05    | 0.576369385  |
| 2391 | IL1RL1   | 9173 | 6.82E-09    | 0.7533161    |
| 2392 | HTR3B    | 9177 | 0.002773019 | 0.460865392  |
| 2393 | ARHGEF2  | 9181 | 1.44E-06    | 0.666372225  |
| 2394 | BUB3     | 9184 | 0.001143909 | -0.494243223 |
| 2395 | REPS2    | 9185 | 9.46E-09    | 0.748690006  |
| 2396 | SLC24A1  | 9187 | 0.000395887 | -0.53026444  |
| 2397 | DDX21    | 9188 | 0.000506319 | -0.522379728 |
| 2398 | DEDD     | 9191 | 0.0004857   | -0.523762398 |
| 2399 | SLC33A1  | 9197 | 0.005862766 | -0.429537203 |
| 2400 | ZMYM4    | 9202 | 0.000992572 | -0.499325925 |
| 2401 | LRRFIP1  | 9208 | 0.005322777 | -0.433765594 |
| 2402 | BMP15    | 9210 | 5.32E-05    | 0.586913332  |
| 2403 | LGI1     | 9211 | 2.14E-06    | 0.658728691  |
| 2404 | XPR1     | 9213 | 0.002988709 | -0.457945794 |
| 2405 | Unknown  | 9214 | 9.74E-10    | 0.779547544  |
| 2406 | LARGE    | 9215 | 0.00024704  | 0.544779542  |
| 2407 | VAPB     | 9217 | 8.55E-07    | 0.676043872  |
| 2408 | VAPA     | 9218 | 0.003771974 | -0.448408464 |
| 2409 | DLGAP2   | 9228 | 2.04E-07    | 0.70135086   |
| 2410 | DLGAP1   | 9229 | 0.001203099 | 0.492449235  |
| 2411 | RAB11B   | 9230 | 0.005227184 | 0.434563001  |
| 2412 | PTTG1    | 9232 | 4.42E-05    | 0.591597312  |
| 2413 | PNMA1    | 9240 | 0.001860505 | -0.476249087 |
| 2414 | MSC      | 9242 | 1.19E-10    | 0.8074452    |
| 2415 | GPR50    | 9248 | 2.10E-07    | 0.700834803  |
| 2416 | RPS6KA5  | 9252 | 0.006978147 | 0.421846703  |
| 2417 | NUMBL    | 9253 | 0.001909294 | -0.47526491  |
| 2418 | SCYE1    | 9255 | 0.001711688 | -0.47946093  |
| 2419 | PDLIM7   | 9260 | 0.007595786 | 0.417902715  |
| 2420 | STK17B   | 9262 | 0.001236984 | 0.491476379  |
| 2421 | PSCD1    | 9267 | 0.008213725 | -0.414220988 |
| 2422 | ITGB1BP1 | 9270 | 0.001827178 | -0.476947768 |
| 2423 | WDR46    | 9277 | 0.000186691 | -0.552946485 |
| 2424 | TAAR2    | 9287 | 8.66E-06    | 0.629897454  |

|      |          |      |             |              |
|------|----------|------|-------------|--------------|
| 2425 | TAAR3    | 9288 | 2.98E-07    | 0.694828441  |
| 2426 | GPR56    | 9289 | 0.000155794 | 0.558129299  |
| 2427 | GPR52    | 9293 | 2.43E-05    | 0.606252455  |
| 2428 | SFRS11   | 9295 | 0.000333042 | -0.535725292 |
| 2429 | SOCS6    | 9306 | 0.003762093 | 0.448527908  |
| 2430 | CD83     | 9308 | 1.93E-08    | 0.738478066  |
| 2431 | ZNF235   | 9310 | 0.003939433 | 0.446542744  |
| 2432 | KCNB2    | 9312 | 4.61E-08    | 0.725212938  |
| 2433 | MMP20    | 9313 | 1.56E-05    | 0.616712738  |
| 2434 | TRIP12   | 9320 | 0.001165318 | -0.493575304 |
| 2435 | HMG3     | 9324 | 0.000810855 | -0.506488435 |
| 2436 | TRIP4    | 9325 | 0.001114815 | -0.495159397 |
| 2437 | GTF3C3   | 9330 | 4.91E-05    | -0.588937833 |
| 2438 | TGM5     | 9333 | 7.52E-06    | 0.632980326  |
| 2439 | B4GALT5  | 9334 | 0.003954647 | -0.446389656 |
| 2440 | GLP2R    | 9340 | 1.93E-05    | 0.611708603  |
| 2441 | SNAP29   | 9342 | 6.91E-06    | 0.634783626  |
| 2442 | EFTUD2   | 9343 | 0.000781405 | -0.50774495  |
| 2443 | TAOK2    | 9344 | 5.38E-10    | 0.787284875  |
| 2444 | RPL23    | 9349 | 0.000346137 | -0.534511559 |
| 2445 | SLC9A3R2 | 9351 | 0.009307209 | -0.408217329 |
| 2446 | TXNL1    | 9352 | 0.00047253  | -0.524641223 |
| 2447 | UBE4A    | 9354 | 9.00E-05    | -0.573268561 |
| 2448 | PPIG     | 9360 | 0.000827827 | 0.505735006  |
| 2449 | LONP1    | 9361 | 0.00677331  | -0.423204348 |
| 2450 | RAB28    | 9364 | 0.00183834  | -0.476711563 |
| 2451 | COX5A    | 9377 | 0.009045521 | -0.409600857 |
| 2452 | NRXN1    | 9378 | 1.71E-09    | 0.771969783  |
| 2453 | GRHR     | 9380 | 3.23E-05    | -0.599365319 |
| 2454 | COG1     | 9382 | 1.18E-07    | 0.710354268  |
| 2455 | SLC22A14 | 9389 | 1.18E-10    | 0.807586636  |
| 2456 | CIAO1    | 9391 | 0.000393019 | -0.53047655  |
| 2457 | TGFBRAP1 | 9392 | 0.000492025 | -0.523356898 |
| 2458 | HS6ST1   | 9394 | 0.000742714 | -0.509536387 |
| 2459 | GRAP2    | 9402 | 1.25E-07    | 0.70949255   |
| 2460 | LPXN     | 9404 | 4.71E-08    | 0.724862353  |
| 2461 | ZRANB2   | 9406 | 0.001497504 | -0.48442076  |
| 2462 | ARHGAP29 | 9411 | 0.005418998 | -0.432971382 |
| 2463 | TJP2     | 9414 | 0.000914347 | -0.502259587 |
| 2464 | DDX23    | 9416 | 0.00068385  | -0.512335415 |
| 2465 | CRIP1    | 9419 | 0.000144149 | 0.560305179  |
| 2466 | HAND1    | 9421 | 0.000152891 | 0.558652893  |
| 2467 | ECEL1    | 9427 | 4.61E-05    | 0.590523148  |
| 2468 | NCR2     | 9436 | 3.59E-08    | 0.728963593  |
| 2469 | NCR1     | 9437 | 2.48E-06    | 0.655787867  |

|      |          |      |             |              |
|------|----------|------|-------------|--------------|
| 2470 | MED23    | 9439 | 0.001199904 | -0.492548432 |
| 2471 | MED17    | 9440 | 0.00909301  | -0.409338991 |
| 2472 | MED26    | 9441 | 0.001185759 | -0.492982746 |
| 2473 | ITM2B    | 9445 | 0.002471144 | -0.465551674 |
| 2474 | GSTO1    | 9446 | 0.006777034 | -0.423178167 |
| 2475 | AIM2     | 9447 | 0.009521349 | 0.407165201  |
| 2476 | LY86     | 9450 | 4.71E-08    | 0.724886307  |
| 2477 | EIF2AK3  | 9451 | 0.001897863 | -0.475482636 |
| 2478 | ITM2A    | 9452 | 3.01E-06    | 0.651924382  |
| 2479 | FHL5     | 9457 | 7.08E-08    | 0.718409885  |
| 2480 | ARHGEF6  | 9459 | 0.000705562 | 0.511283907  |
| 2481 | HAND2    | 9464 | 1.04E-09    | 0.778656956  |
| 2482 | CHST3    | 9469 | 0.000939743 | 0.501218004  |
| 2483 | EIF4E2   | 9470 | 0.003705308 | -0.449134578 |
| 2484 | AKAP6    | 9472 | 1.18E-10    | 0.807586854  |
| 2485 | MED20    | 9477 | 6.75E-08    | 0.719137992  |
| 2486 | ONECUT2  | 9480 | 0.000180052 | 0.553990808  |
| 2487 | PIGL     | 9487 | 2.10E-09    | 0.769208403  |
| 2488 | PGS1     | 9489 | 0.00015719  | -0.557860536 |
| 2489 | KIF23    | 9493 | 1.24E-06    | 0.669243428  |
| 2490 | MAGED1   | 9500 | 0.000157157 | -0.557879848 |
| 2491 | PAGE4    | 9506 | 7.13E-10    | 0.783688207  |
| 2492 | PMPCB    | 9512 | 0.000359859 | -0.533235047 |
| 2493 | FXR2     | 9513 | 1.23E-07    | 0.70968605   |
| 2494 | STXBP5L  | 9515 | 4.57E-09    | 0.758848925  |
| 2495 | TBPL1    | 9519 | 0.005250483 | -0.43437568  |
| 2496 | GPSN2    | 9524 | 0.004916513 | -0.437196878 |
| 2497 | VPS4B    | 9525 | 0.001541353 | -0.483381589 |
| 2498 | MPDU1    | 9526 | 1.31E-08    | 0.744172798  |
| 2499 | TMEM59   | 9528 | 0.004626823 | -0.439804242 |
| 2500 | BAG5     | 9529 | 0.001189804 | -0.492849306 |
| 2501 | POLR1C   | 9533 | 0.002574036 | -0.463899012 |
| 2502 | TP53I11  | 9537 | 2.22E-08    | 0.736326879  |
| 2503 | EI24     | 9538 | 1.85E-05    | -0.612752863 |
| 2504 | NRG2     | 9542 | 1.84E-11    | 0.836541998  |
| 2505 | APBA3    | 9546 | 0.002245619 | -0.46916334  |
| 2506 | ATP5J2   | 9551 | 0.000239935 | -0.545656862 |
| 2507 | SPAG7    | 9552 | 0.002758256 | -0.461068809 |
| 2508 | H2AFY    | 9555 | 0.000162676 | -0.556875468 |
| 2509 | C14orf2  | 9556 | 0.000140387 | -0.561041328 |
| 2510 | GTF2IRD1 | 9569 | 0.000110599 | -0.567699402 |
| 2511 | GOSR2    | 9570 | 3.80E-10    | 0.791815354  |
| 2512 | GDF3     | 9573 | 2.18E-08    | 0.736629729  |
| 2513 | CLOCK    | 9575 | 3.39E-08    | 0.729759351  |
| 2514 | PREPL    | 9581 | 0.000564908 | -0.518778881 |



|      |          |      |             |              |
|------|----------|------|-------------|--------------|
| 2515 | ENTPD4   | 9583 | 0.004030305 | -0.44560816  |
| 2516 | RBM39    | 9584 | 1.04E-05    | -0.62586497  |
| 2517 | PRDX6    | 9588 | 0.000812066 | -0.506426816 |
| 2518 | WTAP     | 9589 | 0.00071062  | -0.511025358 |
| 2519 | IER2     | 9592 | 0.001007182 | -0.498797319 |
| 2520 | SMAD5OS  | 9597 | 4.09E-10    | 0.790921323  |
| 2521 | PDIA4    | 9601 | 0.005995584 | -0.428514447 |
| 2522 | NFE2L3   | 9603 | 0.006098651 | 0.427800622  |
| 2523 | RNF14    | 9604 | 0.001901159 | -0.475415092 |
| 2524 | RAB36    | 9609 | 0.008432118 | 0.412943781  |
| 2525 | NCOR2    | 9612 | 0.000502485 | -0.522621263 |
| 2526 | TRAF4    | 9618 | 0.009056391 | -0.409525003 |
| 2527 | KLK4     | 9622 | 5.42E-11    | 0.818905558  |
| 2528 | AATK     | 9625 | 1.72E-07    | 0.704206311  |
| 2529 | GUCA1C   | 9626 | 5.99E-11    | 0.817332038  |
| 2530 | RGS6     | 9628 | 4.99E-06    | 0.641625507  |
| 2531 | CLCA3    | 9629 | 4.87E-09    | 0.757931341  |
| 2532 | GNA14    | 9630 | 0.000896167 | 0.503028617  |
| 2533 | CLCA2    | 9635 | 0.00067143  | 0.512938644  |
| 2534 | IKBKE    | 9641 | 1.13E-09    | 0.777441907  |
| 2535 | MORF4L2  | 9643 | 2.83E-05    | -0.602525258 |
| 2536 | CTR9     | 9646 | 0.00777943  | -0.416800867 |
| 2537 | PPM1F    | 9647 | 1.40E-08    | 0.743262319  |
| 2538 | GCC2     | 9648 | 0.00029386  | -0.539557805 |
| 2539 | RALGPS1  | 9649 | 5.13E-10    | 0.787859517  |
| 2540 | MTFR1    | 9650 | 0.002605635 | 0.463411962  |
| 2541 | TTLL4    | 9654 | 2.29E-09    | 0.768089016  |
| 2542 | KIAA0430 | 9665 | 0.008501748 | -0.412532793 |
| 2543 | IPO13    | 9670 | 1.36E-09    | 0.775051968  |
| 2544 | SLC25A44 | 9673 | 0.008948751 | -0.410127689 |
| 2545 | KIAA0406 | 9675 | 0.000858586 | -0.504493363 |
| 2546 | PHF14    | 9678 | 5.76E-05    | -0.584887005 |
| 2547 | JMJD2A   | 9682 | 0.006155476 | 0.427388752  |
| 2548 | N4BP1    | 9683 | 1.02E-07    | 0.712626308  |
| 2549 | Unknown  | 9684 | 3.51E-05    | -0.597350747 |
| 2550 | CLINT1   | 9685 | 0.003315611 | 0.453736319  |
| 2551 | VGLL4    | 9686 | 4.03E-07    | -0.689604036 |
| 2552 | NUP93    | 9688 | 0.008400125 | -0.413134378 |
| 2553 | UBE3C    | 9690 | 0.004916513 | -0.437195447 |
| 2554 | RAPGEF2  | 9693 | 0.000469681 | -0.524864485 |
| 2555 | TTC35    | 9694 | 0.00174845  | -0.478615622 |
| 2556 | CROCC    | 9696 | 1.40E-10    | 0.805421553  |
| 2557 | ESPL1    | 9700 | 0.008346152 | 0.413480828  |
| 2558 | CEP57    | 9702 | 0.001588491 | -0.482249219 |
| 2559 | KIAA0100 | 9703 | 0.000214433 | -0.54896511  |

|      |          |      |             |              |
|------|----------|------|-------------|--------------|
| 2560 | DHX34    | 9704 | 6.12E-11    | 0.816801652  |
| 2561 | ST18     | 9705 | 3.89E-05    | 0.594823275  |
| 2562 | ULK2     | 9706 | 0.003213917 | -0.455006708 |
| 2563 | HERPUD1  | 9709 | 0.00171773  | -0.479319804 |
| 2564 | FAM131B  | 9715 | 0.004165841 | 0.44426123   |
| 2565 | AQR      | 9716 | 0.002110681 | 0.471526531  |
| 2566 | ECE2     | 9718 | 0.00057833  | 0.518035705  |
| 2567 | NOS1AP   | 9722 | 3.24E-06    | 0.650452718  |
| 2568 | SART3    | 9733 | 0.001476484 | -0.484941135 |
| 2569 | USP34    | 9736 | 0.007804199 | -0.416666861 |
| 2570 | LAPTM4A  | 9741 | 0.003800574 | -0.448098477 |
| 2571 | IFT140   | 9742 | 5.69E-10    | 0.786543245  |
| 2572 | FAM115A  | 9747 | 0.001461005 | -0.485363836 |
| 2573 | HDAC4    | 9759 | 0.002536488 | 0.464493784  |
| 2574 | KIAA0152 | 9761 | 0.000300763 | 0.538838475  |
| 2575 | KIAA0513 | 9764 | 2.99E-06    | 0.652068266  |
| 2576 | KIAA0247 | 9766 | 0.00634394  | -0.426093681 |
| 2577 | PHF16    | 9767 | 0.004029772 | -0.445628826 |
| 2578 | RASSF2   | 9770 | 1.75E-08    | 0.740002073  |
| 2579 | KIAA0195 | 9772 | 5.82E-05    | 0.584590633  |
| 2580 | BCLAF1   | 9774 | 9.89E-05    | -0.570743314 |
| 2581 | EIF4A3   | 9775 | 0.002820489 | -0.460216305 |
| 2582 | KIAA0652 | 9776 | 0.002223031 | 0.469586493  |
| 2583 | TM9SF4   | 9777 | 0.00097346  | 0.499977149  |
| 2584 | TBC1D5   | 9779 | 0.003722139 | -0.448947892 |
| 2585 | FAM38A   | 9780 | 0.004469325 | 0.441217247  |
| 2586 | MATR3    | 9782 | 0.000119643 | -0.565433885 |
| 2587 | RIMS3    | 9783 | 0.000296421 | 0.539295174  |
| 2588 | SNX17    | 9784 | 1.39E-05    | 0.619329537  |
| 2589 | KIAA0586 | 9786 | 1.75E-06    | 0.662559912  |
| 2590 | MTSS1    | 9788 | 1.49E-06    | 0.665697808  |
| 2591 | SPCS2    | 9789 | 7.54E-09    | 0.751922911  |
| 2592 | BMS1     | 9790 | 0.003410249 | -0.45257787  |
| 2593 | MAML1    | 9794 | 0.00115829  | -0.493796616 |
| 2594 | KIAA0174 | 9798 | 0.000263888 | -0.54278696  |
| 2595 | DAZAP2   | 9802 | 0.000508323 | -0.522253696 |
| 2596 | TOMM20   | 9804 | 0.002385699 | -0.466930027 |
| 2597 | SCRN1    | 9805 | 0.00030058  | -0.538860938 |
| 2598 | IHPK1    | 9807 | 0.001887534 | 0.475682387  |
| 2599 | RNF40    | 9810 | 1.17E-09    | 0.776953818  |
| 2600 | SFI1     | 9814 | 0.009707453 | -0.406246389 |
| 2601 | KEAP1    | 9817 | 0.000274756 | -0.541588129 |
| 2602 | NUPL1    | 9818 | 0.000630509 | -0.515105604 |
| 2603 | SPATA2   | 9825 | 9.13E-06    | 0.62864396   |
| 2604 | ARHGEF11 | 9826 | 1.33E-09    | 0.775260574  |

|      |          |      |             |              |
|------|----------|------|-------------|--------------|
| 2605 | RGP1     | 9827 | 0.007825316 | -0.416535876 |
| 2606 | ARHGEF17 | 9828 | 3.28E-08    | 0.730313888  |
| 2607 | KIAA0125 | 9834 | 3.00E-08    | 0.731693706  |
| 2608 | LCMT2    | 9836 | 0.002391579 | -0.466828971 |
| 2609 | ZEB2     | 9839 | 0.003869308 | 0.447303273  |
| 2610 | KIAA0748 | 9840 | 0.002162371 | 0.470606939  |
| 2611 | ELMO1    | 9844 | 9.07E-10    | 0.780611564  |
| 2612 | GAB2     | 9846 | 0.004604767 | -0.439993495 |
| 2613 | KIAA0528 | 9847 | 0.003891932 | -0.447053709 |
| 2614 | MFAP3L   | 9848 | 0.003961046 | 0.446326799  |
| 2615 | ZNF518   | 9849 | 0.00954876  | -0.407024589 |
| 2616 | KIAA0753 | 9851 | 0.001633219 | 0.481239246  |
| 2617 | EPM2AIP1 | 9852 | 0.000127284 | -0.563712376 |
| 2618 | RUSC2    | 9853 | 0.000458992 | 0.525562129  |
| 2619 | CEP350   | 9857 | 0.005862766 | -0.429538424 |
| 2620 | CEP170   | 9859 | 9.14E-09    | 0.749161193  |
| 2621 | PSMD6    | 9861 | 5.72E-07    | -0.683436865 |
| 2622 | TRIM66   | 9866 | 0.000713987 | 0.510855338  |
| 2623 | PJA2     | 9867 | 1.02E-08    | 0.747625719  |
| 2624 | TOMM70A  | 9868 | 0.000112955 | -0.567057369 |
| 2625 | SETDB1   | 9869 | 0.007539911 | -0.418226912 |
| 2626 | KIAA0317 | 9870 | 0.004950862 | -0.436877415 |
| 2627 | TLK1     | 9874 | 0.000176782 | -0.554526866 |
| 2628 | ZC3H11A  | 9877 | 0.001263402 | -0.490700739 |
| 2629 | DDX46    | 9879 | 0.000989556 | -0.499429519 |
| 2630 | ZBTB39   | 9880 | 3.76E-07    | 0.690880838  |
| 2631 | OSBPL2   | 9885 | 0.000592989 | -0.517212464 |
| 2632 | KIAA0329 | 9895 | 0.00026528  | -0.54261091  |
| 2633 | UBAP2L   | 9898 | 0.009255068 | -0.408517974 |
| 2634 | SV2B     | 9899 | 4.29E-07    | 0.688483368  |
| 2635 | SV2A     | 9900 | 0.000165953 | 0.556326794  |
| 2636 | MRC2     | 9902 | 0.000519931 | -0.521532322 |
| 2637 | DENND4B  | 9909 | 0.006320814 | -0.426252659 |
| 2638 | ARNT2    | 9915 | 0.004821294 | -0.438047096 |
| 2639 | SEC16A   | 9919 | 0.004111927 | -0.44477521  |
| 2640 | RNF10    | 9921 | 0.006386702 | -0.425823806 |
| 2641 | ZBTB40   | 9923 | 9.51E-06    | 0.627783572  |
| 2642 | USP52    | 9924 | 0.008832052 | -0.410786273 |
| 2643 | ZBTB5    | 9925 | 0.001671368 | -0.480332557 |
| 2644 | HELZ     | 9931 | 0.000110789 | -0.567638508 |
| 2645 | KIAA0020 | 9933 | 0.002143908 | -0.470934214 |
| 2646 | XYLB     | 9942 | 0.000119643 | 0.565424873  |
| 2647 | GFPT2    | 9945 | 0.005309207 | 0.43388619   |
| 2648 | HS3ST3A1 | 9955 | 0.003817401 | 0.447904689  |
| 2649 | HS3ST2   | 9956 | 2.58E-10    | 0.796872804  |

|      |          |       |             |              |
|------|----------|-------|-------------|--------------|
| 2650 | USP3     | 9960  | 0.001148464 | -0.494103937 |
| 2651 | MVP      | 9961  | 0.005679178 | -0.430966448 |
| 2652 | THRAP3   | 9967  | 0.003963766 | -0.44629705  |
| 2653 | MED12    | 9968  | 0.000931646 | -0.501558646 |
| 2654 | MED13    | 9969  | 0.000199409 | -0.551054415 |
| 2655 | NR1I3    | 9970  | 2.54E-10    | 0.797087315  |
| 2656 | NR1H4    | 9971  | 0.000589537 | 0.517415315  |
| 2657 | CCS      | 9973  | 0.0080724   | -0.415070332 |
| 2658 | CLEC2B   | 9976  | 7.90E-07    | 0.677529816  |
| 2659 | RBX1     | 9978  | 0.003631176 | -0.449991198 |
| 2660 | REC8     | 9985  | 0.009902979 | -0.405257465 |
| 2661 | RCE1     | 9986  | 0.000382943 | -0.531292593 |
| 2662 | HNRPDL   | 9987  | 3.93E-07    | -0.690059778 |
| 2663 | PPP4R1   | 9989  | 0.000593256 | -0.517187755 |
| 2664 | NAALAD2  | 10003 | 7.53E-06    | 0.632955143  |
| 2665 | NAALADL1 | 10004 | 7.63E-05    | 0.577605586  |
| 2666 | ACOT8    | 10005 | 0.000588499 | 0.517477653  |
| 2667 | ABI1     | 10006 | 0.000795946 | 0.507136343  |
| 2668 | HDAC6    | 10013 | 1.56E-09    | 0.773275559  |
| 2669 | HDAC5    | 10014 | 2.60E-08    | 0.733921594  |
| 2670 | PDCD6IP  | 10015 | 1.26E-05    | -0.621558984 |
| 2671 | PDCD6    | 10016 | 0.001521746 | -0.483844245 |
| 2672 | BCL2L11  | 10018 | 8.94E-08    | 0.714753661  |
| 2673 | SH2B3    | 10019 | 8.51E-08    | 0.715537809  |
| 2674 | HCN4     | 10021 | 4.58E-11    | 0.821461781  |
| 2675 | FRAT1    | 10023 | 0.001877474 | -0.475884584 |
| 2676 | TROAP    | 10024 | 0.000401002 | 0.529844478  |
| 2677 | MED16    | 10025 | 0.007120251 | -0.42097974  |
| 2678 | PARP2    | 10038 | 0.000359208 | 0.533299814  |
| 2679 | TOM1L1   | 10040 | 0.006307323 | -0.426349085 |
| 2680 | HMG2L1   | 10042 | 0.001601847 | -0.481926288 |
| 2681 | CST8     | 10047 | 1.67E-09    | 0.772297058  |
| 2682 | RANBP9   | 10048 | 0.000359949 | -0.533222199 |
| 2683 | DNAJB6   | 10049 | 0.006504632 | -0.425025191 |
| 2684 | SLC17A4  | 10050 | 4.68E-10    | 0.789036096  |
| 2685 | GJC1     | 10052 | 4.03E-06    | 0.646029794  |
| 2686 | FARSB    | 10056 | 0.003897896 | 0.446988686  |
| 2687 | DNM1L    | 10059 | 0.000794404 | -0.507205291 |
| 2688 | SCAMP2   | 10066 | 0.000332667 | 0.535763992  |
| 2689 | SCAMP3   | 10067 | 0.000930118 | -0.501613748 |
| 2690 | MUC12    | 10071 | 1.57E-11    | 0.839113011  |
| 2691 | DPP3     | 10072 | 0.001981429 | -0.473899362 |
| 2692 | HUWE1    | 10075 | 0.000190625 | -0.552374571 |
| 2693 | TSSC4    | 10078 | 1.40E-08    | 0.743273519  |
| 2694 | USH1C    | 10083 | 5.94E-08    | 0.721193437  |

|      |           |       |             |              |
|------|-----------|-------|-------------|--------------|
| 2695 | COL4A3BP  | 10087 | 0.007156028 | -0.420729973 |
| 2696 | KCNK7     | 10089 | 5.51E-05    | 0.586076807  |
| 2697 | ACTR3     | 10096 | 0.005315026 | -0.433829962 |
| 2698 | TSPAN3    | 10099 | 0.000127663 | -0.563622505 |
| 2699 | TSFM      | 10102 | 0.001408473 | -0.486709351 |
| 2700 | CTDSP2    | 10106 | 2.81E-05    | -0.602689632 |
| 2701 | TRIM10    | 10107 | 0.002027265 | 0.473045272  |
| 2702 | ARPC2     | 10109 | 1.46E-05    | -0.618160031 |
| 2703 | SGK2      | 10110 | 0.003505492 | 0.451469369  |
| 2704 | PREB      | 10113 | 4.19E-05    | -0.592931198 |
| 2705 | HIPK3     | 10114 | 1.87E-05    | -0.612444152 |
| 2706 | ENAM      | 10117 | 1.45E-09    | 0.774216352  |
| 2707 | ACTR1B    | 10120 | 3.09E-05    | -0.600476237 |
| 2708 | ARL4C     | 10123 | 0.009404943 | -0.407708711 |
| 2709 | ZNF263    | 10127 | 0.00064862  | -0.514151938 |
| 2710 | LRPPRC    | 10128 | 0.0013062   | -0.489516185 |
| 2711 | TRAP1     | 10131 | 1.20E-05    | -0.622651191 |
| 2712 | BCAP31    | 10134 | 0.001298015 | -0.489734876 |
| 2713 | Unknown   | 10137 | 0.000471327 | -0.524730596 |
| 2714 | YAF2      | 10138 | 3.56E-06    | 0.648525205  |
| 2715 | ARFRP1    | 10139 | 0.000167523 | -0.556044389 |
| 2716 | C4orf6    | 10141 | 0.000146151 | 0.559941131  |
| 2717 | AKAP9     | 10142 | 0.001606744 | -0.481812068 |
| 2718 | CLEC3A    | 10143 | 1.12E-10    | 0.808261406  |
| 2719 | FAM13A1   | 10144 | 0.002676524 | -0.462334718 |
| 2720 | G3BP1     | 10146 | 3.56E-05    | -0.59700187  |
| 2721 | SFRS14    | 10147 | 0.002226066 | -0.469535753 |
| 2722 | CEBPZ     | 10153 | 0.000302517 | -0.538645924 |
| 2723 | TRIM28    | 10155 | 0.001765198 | -0.478241516 |
| 2724 | FARP1     | 10160 | 0.001891848 | -0.475591549 |
| 2725 | SERF2     | 10169 | 1.62E-05    | -0.615841265 |
| 2726 | DHRS9     | 10170 | 7.44E-07    | 0.678585858  |
| 2727 | RCL1      | 10171 | 0.001510116 | 0.484104556  |
| 2728 | Unknown   | 10181 | 0.000470461 | -0.524812062 |
| 2729 | TSHZ1     | 10194 | 0.005648571 | -0.431225454 |
| 2730 | PRMT3     | 10196 | 0.000254353 | -0.543863581 |
| 2731 | MPHOSPH10 | 10199 | 0.003364807 | -0.453121163 |
| 2732 | CALCRL    | 10203 | 5.42E-08    | 0.722642382  |
| 2733 | NUTF2     | 10204 | 1.15E-09    | 0.777207493  |
| 2734 | TRIM13    | 10206 | 0.003596073 | -0.450375734 |
| 2735 | EIF1      | 10209 | 0.000175009 | -0.554808541 |
| 2736 | SSX3      | 10214 | 0.000117771 | 0.565903862  |
| 2737 | OLIG2     | 10215 | 1.61E-05    | 0.615983595  |
| 2738 | CTDSPL    | 10217 | 0.000775524 | -0.508025913 |
| 2739 | ANGPTL7   | 10218 | 4.57E-05    | 0.590753509  |

|      |         |       |             |              |
|------|---------|-------|-------------|--------------|
| 2740 | KLRG1   | 10219 | 0.001035286 | 0.497795806  |
| 2741 | GDF11   | 10220 | 4.73E-09    | 0.758306167  |
| 2742 | GPA33   | 10223 | 1.30E-11    | 0.844676936  |
| 2743 | CD96    | 10225 | 0.009692888 | 0.4063211    |
| 2744 | M6PRBP1 | 10226 | 0.000588742 | -0.517459879 |
| 2745 | TETRA   | 10227 | 0.00721056  | -0.420391238 |
| 2746 | STX6    | 10228 | 0.002007218 | -0.473387814 |
| 2747 | RCAN2   | 10231 | 9.82E-08    | 0.713315984  |
| 2748 | LRRC23  | 10233 | 0.000725146 | 0.510305511  |
| 2749 | LRRC17  | 10234 | 0.005353879 | 0.433492416  |
| 2750 | HNRNPR  | 10236 | 2.77E-05    | -0.603128577 |
| 2751 | GLYAT   | 10249 | 7.48E-11    | 0.813736265  |
| 2752 | SRRM1   | 10250 | 0.00424918  | -0.443423501 |
| 2753 | SPRY1   | 10252 | 0.007333428 | -0.419553467 |
| 2754 | STAM2   | 10254 | 0.007102062 | -0.421088377 |
| 2755 | CNKSR1  | 10256 | 0.003140502 | -0.455979141 |
| 2756 | SF3B4   | 10262 | 0.003440129 | -0.452192575 |
| 2757 | CDK2AP2 | 10263 | 0.003600802 | -0.45032417  |
| 2758 | RAMP2   | 10266 | 2.91E-08    | 0.732159351  |
| 2759 | FSTL3   | 10272 | 0.000624821 | 0.515414093  |
| 2760 | OPRS1   | 10280 | 0.000227278 | 0.54725343   |
| 2761 | DSCR4   | 10281 | 0.000969617 | 0.500128428  |
| 2762 | SAP18   | 10284 | 0.000283442 | -0.540631335 |
| 2763 | SMNDC1  | 10285 | 0.005596154 | -0.431624946 |
| 2764 | LILRB2  | 10288 | 3.29E-08    | 0.73027724   |
| 2765 | EIF1B   | 10289 | 1.67E-05    | -0.615142378 |
| 2766 | SF3A1   | 10291 | 0.000904184 | -0.502711812 |
| 2767 | MAEA    | 10296 | 0.000123136 | -0.564621418 |
| 2768 | PAK4    | 10298 | 7.41E-05    | 0.578366655  |
| 2769 | 6-Mar   | 10299 | 0.000578793 | -0.518006923 |
| 2770 | DSCR3   | 10311 | 0.000589851 | 0.517394149  |
| 2771 | RTN3    | 10313 | 0.00080937  | -0.506560117 |
| 2772 | LANCL1  | 10314 | 0.00442797  | -0.441605915 |
| 2773 | NMUR1   | 10316 | 0.009270608 | -0.408425551 |
| 2774 | TNIP1   | 10318 | 0.008431046 | -0.412953912 |
| 2775 | SMYD5   | 10322 | 0.000140002 | -0.561116401 |
| 2776 | KBTBD10 | 10324 | 2.18E-08    | 0.736606568  |
| 2777 | SIRPB1  | 10326 | 9.21E-11    | 0.810876103  |
| 2778 | AKR1A1  | 10327 | 2.29E-05    | -0.60766529  |
| 2779 | COX4NB  | 10328 | 0.000613686 | -0.516061713 |
| 2780 | CNPY2   | 10330 | 0.00016934  | -0.555751914 |
| 2781 | B3GNT3  | 10331 | 3.11E-09    | 0.764061034  |
| 2782 | TLR6    | 10333 | 1.43E-09    | 0.774364161  |
| 2783 | MRVI1   | 10335 | 1.47E-05    | 0.618038086  |
| 2784 | PCGF3   | 10336 | 0.001060275 | -0.49692686  |

|      |              |       |             |              |
|------|--------------|-------|-------------|--------------|
| 2785 | CCL26        | 10344 | 0.000849035 | 0.504884425  |
| 2786 | WARS2        | 10352 | 0.001403117 | -0.486873444 |
| 2787 | HMG20B       | 10362 | 0.009733256 | -0.406124505 |
| 2788 | HMG20A       | 10363 | 0.003330956 | -0.453527214 |
| 2789 | CBARA1       | 10367 | 0.001861272 | -0.47622626  |
| 2790 | CACNG2       | 10369 | 1.32E-05    | 0.620496651  |
| 2791 | IRF9         | 10379 | 0.008639992 | 0.411775481  |
| 2792 | TUBB3        | 10381 | 0.007111766 | -0.421030739 |
| 2793 | TUBB4        | 10382 | 2.95E-11    | 0.827892067  |
| 2794 | TUBB2C       | 10383 | 0.008633609 | -0.411828379 |
| 2795 | CEPT1        | 10390 | 1.80E-07    | 0.703510349  |
| 2796 | NOD1         | 10392 | 1.37E-06    | 0.667225307  |
| 2797 | GNB2L1       | 10399 | 4.76E-05    | -0.589703084 |
| 2798 | PEMT         | 10400 | 0.008211553 | -0.414236497 |
| 2799 | IFITM3       | 10410 | 0.00015122  | -0.558985557 |
| 2800 | YAP1         | 10413 | 0.000509711 | -0.522164831 |
| 2801 | TESK2        | 10420 | 1.33E-06    | 0.667793451  |
| 2802 | CD2BP2       | 10421 | 0.001952478 | 0.474431948  |
| 2803 | CDIPT        | 10423 | 0.00012184  | -0.564938893 |
| 2804 | PGRMC2       | 10424 | 0.004712648 | -0.43900679  |
| 2805 | ARIH2        | 10425 | 2.65E-05    | -0.604135192 |
| 2806 | TUBGCP3      | 10426 | 0.008967197 | -0.410015282 |
| 2807 | SEC24B       | 10427 | 2.88E-06    | -0.652865269 |
| 2808 | CFDP1        | 10428 | 0.004379424 | -0.442077019 |
| 2809 | TMEM147      | 10430 | 0.002634484 | -0.462952555 |
| 2810 | RBM14        | 10432 | 0.001560551 | 0.482898514  |
| 2811 | TIMM17A      | 10440 | 0.000837562 | -0.505329751 |
| 2812 | RP11-298P3.3 | 10443 | 0.004685389 | -0.43927333  |
| 2813 | ZER1         | 10444 | 0.000301891 | 0.538719857  |
| 2814 | MCRS1        | 10445 | 1.22E-09    | 0.776382143  |
| 2815 | MAP3K7IP1    | 10454 | 0.000753158 | -0.509073735 |
| 2816 | HAX1         | 10456 | 0.004851709 | -0.437791148 |
| 2817 | MAD2L2       | 10459 | 5.82E-05    | 0.584568547  |
| 2818 | MERTK        | 10461 | 3.62E-10    | 0.792528592  |
| 2819 | SLC30A9      | 10463 | 0.002199555 | -0.469965862 |
| 2820 | PIBF1        | 10464 | 0.000523211 | -0.52129487  |
| 2821 | PPIH         | 10465 | 0.000608904 | 0.516339819  |
| 2822 | ZNHIT1       | 10467 | 0.005052174 | -0.436050443 |
| 2823 | TIMM44       | 10469 | 0.006401217 | -0.425727413 |
| 2824 | TADA3L       | 10474 | 0.000276039 | -0.541452075 |
| 2825 | UBE2E3       | 10477 | 0.001968442 | -0.474142049 |
| 2826 | SLC9A6       | 10479 | 0.002039077 | -0.472821575 |
| 2827 | EIF3M        | 10480 | 4.20E-05    | -0.592913041 |
| 2828 | HOXB13       | 10481 | 2.26E-11    | 0.832940436  |
| 2829 | NXF1         | 10482 | 8.80E-06    | -0.629524482 |

|      |         |       |             |              |
|------|---------|-------|-------------|--------------|
| 2830 | SEC23B  | 10483 | 0.008070299 | -0.415095964 |
| 2831 | SEC23A  | 10484 | 0.002845179 | -0.459891641 |
| 2832 | Clorf61 | 10485 | 8.80E-07    | 0.675486746  |
| 2833 | CAP1    | 10487 | 0.003318945 | -0.453695965 |
| 2834 | CREB3   | 10488 | 0.002923268 | 0.458819094  |
| 2835 | VTI1B   | 10490 | 0.001094777 | -0.495787761 |
| 2836 | VAT1    | 10493 | 1.79E-07    | 0.703556271  |
| 2837 | STK25   | 10494 | 4.75E-05    | -0.589764465 |
| 2838 | CARM1   | 10498 | 0.007565661 | -0.418084109 |
| 2839 | NCOA2   | 10499 | 0.003783874 | -0.448291696 |
| 2840 | SEMA6C  | 10500 | 1.55E-11    | 0.839901115  |
| 2841 | SEMA6B  | 10501 | 6.46E-06    | 0.636218843  |
| 2842 | SEMA4B  | 10509 | 1.96E-09    | 0.770144279  |
| 2843 | APPBP2  | 10513 | 0.000196068 | -0.551532903 |
| 2844 | MYBBP1A | 10514 | 0.008096045 | -0.414936831 |
| 2845 | FBXW10  | 10517 | 1.45E-10    | 0.804964964  |
| 2846 | DDX17   | 10521 | 2.78E-05    | -0.603007604 |
| 2847 | DEAF1   | 10522 | 0.00218294  | 0.470255342  |
| 2848 | HTATIP  | 10524 | 3.23E-05    | -0.599423777 |
| 2849 | HYOU1   | 10525 | 0.002907773 | -0.459037208 |
| 2850 | IPO8    | 10526 | 0.000599008 | -0.516857725 |
| 2851 | NOL5A   | 10528 | 0.002439404 | -0.466040115 |
| 2852 | PITRM1  | 10531 | 0.000296676 | -0.539266012 |
| 2853 | ANP32B  | 10541 | 0.000609155 | -0.516316162 |
| 2854 | HBXIP   | 10542 | 0.001092387 | -0.495861651 |
| 2855 | TM9SF1  | 10548 | 3.34E-05    | -0.5985778   |
| 2856 | PRDX4   | 10549 | 0.002140525 | -0.470997336 |
| 2857 | RPP38   | 10557 | 2.00E-05    | 0.610918792  |
| 2858 | SPTLC1  | 10558 | 0.000408111 | -0.529281418 |
| 2859 | SLC35A1 | 10559 | 0.003339555 | -0.45342667  |
| 2860 | ARFGEF1 | 10565 | 3.60E-05    | -0.596664322 |
| 2861 | SLC34A2 | 10568 | 0.009742754 | -0.406069206 |
| 2862 | SLU7    | 10569 | 0.004217852 | -0.44373153  |
| 2863 | MRPL28  | 10573 | 5.78E-06    | 0.638599962  |
| 2864 | CCT7    | 10574 | 0.003588211 | -0.450474069 |
| 2865 | CCT4    | 10575 | 0.006731735 | -0.423480843 |
| 2866 | CCT2    | 10576 | 0.002961127 | -0.458329076 |
| 2867 | SORBS1  | 10580 | 7.92E-05    | 0.576660776  |
| 2868 | IFITM2  | 10581 | 0.001846158 | -0.476540734 |
| 2869 | COLEC10 | 10584 | 0.00018427  | 0.553336653  |
| 2870 | POMT1   | 10585 | 0.001693309 | -0.479863628 |
| 2871 | MAB21L2 | 10586 | 2.59E-05    | 0.604710773  |
| 2872 | PRPF8   | 10594 | 0.000164373 | -0.556575373 |
| 2873 | AHSA1   | 10598 | 0.004525366 | -0.440718941 |
| 2874 | USP16   | 10600 | 0.000627515 | -0.515272367 |



|      |          |       |             |              |
|------|----------|-------|-------------|--------------|
| 2875 | PAIP1    | 10605 | 0.004929218 | -0.437095749 |
| 2876 | PAICS    | 10606 | 0.008606936 | -0.41197614  |
| 2877 | MXD4     | 10608 | 0.000601698 | -0.51671732  |
| 2878 | ERLIN1   | 10613 | 0.001564121 | -0.482792358 |
| 2879 | RBCK1    | 10616 | 0.000243855 | -0.545182283 |
| 2880 | STAMPB   | 10617 | 0.002046834 | -0.472680356 |
| 2881 | TGOLN2   | 10618 | 8.52E-05    | -0.57472917  |
| 2882 | ARID3B   | 10620 | 1.66E-10    | 0.803105993  |
| 2883 | POLR3F   | 10621 | 5.73E-05    | 0.585007849  |
| 2884 | POLR3C   | 10623 | 0.002568375 | -0.463985432 |
| 2885 | IVNS1ABP | 10625 | 0.001817721 | -0.477140941 |
| 2886 | TAF6L    | 10629 | 0.000656733 | 0.513709731  |
| 2887 | ATP5L    | 10632 | 0.000173432 | -0.555070243 |
| 2888 | LEFTY1   | 10637 | 1.96E-09    | 0.770150736  |
| 2889 | TUSC4    | 10641 | 0.001067631 | -0.496676059 |
| 2890 | CAMKK2   | 10645 | 0.002084795 | -0.471999005 |
| 2891 | MTX2     | 10651 | 0.00014214  | -0.560681165 |
| 2892 | PMVK     | 10654 | 0.008964716 | -0.410041599 |
| 2893 | CUGBP1   | 10658 | 5.84E-08    | -0.721498383 |
| 2894 | LBX1     | 10660 | 5.38E-05    | 0.586632923  |
| 2895 | KLF1     | 10661 | 4.54E-05    | 0.590987013  |
| 2896 | CTCF     | 10664 | 0.001510116 | -0.484107072 |
| 2897 | C6orf10  | 10665 | 6.08E-07    | 0.682308761  |
| 2898 | FARS2    | 10667 | 1.90E-09    | 0.770503778  |
| 2899 | CGRRF1   | 10668 | 0.004355821 | -0.44230945  |
| 2900 | GNA13    | 10672 | 0.00436261  | -0.442237472 |
| 2901 | CSPG5    | 10675 | 0.000166699 | 0.556206821  |
| 2902 | Unknown  | 10682 | 0.000147165 | -0.559742758 |
| 2903 | RRH      | 10692 | 3.54E-06    | 0.648664735  |
| 2904 | CCT8     | 10694 | 2.24E-06    | -0.65780152  |
| 2905 | CORIN    | 10699 | 0.004352703 | 0.442351125  |
| 2906 | USP39    | 10713 | 0.002623167 | -0.463135627 |
| 2907 | POLD3    | 10714 | 1.38E-05    | 0.619368177  |
| 2908 | TBR1     | 10716 | 0.000506319 | 0.522377095  |
| 2909 | NRG3     | 10718 | 5.12E-05    | 0.587885879  |
| 2910 | POLQ     | 10721 | 1.89E-10    | 0.801167678  |
| 2911 | MGEA5    | 10724 | 0.001321206 | -0.489125577 |
| 2912 | NUDC     | 10726 | 0.000556554 | -0.519279289 |
| 2913 | PTGES3   | 10728 | 0.004328789 | -0.442591861 |
| 2914 | YME1L1   | 10730 | 0.000663972 | -0.513303909 |
| 2915 | TCFL5    | 10732 | 0.005860591 | -0.429561547 |
| 2916 | PLK4     | 10733 | 1.87E-05    | 0.612443676  |
| 2917 | STAG2    | 10735 | 0.001360861 | -0.488031051 |
| 2918 | RBBP9    | 10741 | 2.91E-10    | 0.795308037  |
| 2919 | RAI2     | 10742 | 0.008358249 | -0.413392464 |

|      |          |       |             |              |
|------|----------|-------|-------------|--------------|
| 2920 | RAI1     | 10743 | 0.000361623 | -0.533071428 |
| 2921 | PHTF1    | 10745 | 0.00171326  | -0.479414771 |
| 2922 | MAP3K2   | 10746 | 0.000719417 | -0.510598733 |
| 2923 | MASP2    | 10747 | 0.001887287 | 0.475692147  |
| 2924 | JARID1B  | 10765 | 0.000953524 | -0.500704867 |
| 2925 | HBS1L    | 10767 | 4.32E-05    | 0.592192473  |
| 2926 | AHCYL1   | 10768 | 3.72E-05    | -0.595920975 |
| 2927 | ZMYND11  | 10771 | 2.01E-05    | -0.610806137 |
| 2928 | FUSIP1   | 10772 | 0.000564908 | -0.518777498 |
| 2929 | ARPP-19  | 10776 | 0.001292936 | -0.489880884 |
| 2930 | ARPP-21  | 10777 | 2.54E-10    | 0.797050798  |
| 2931 | ZNF271   | 10778 | 0.007706511 | -0.417213439 |
| 2932 | ZNF234   | 10780 | 0.000914347 | 0.502261403  |
| 2933 | NEK6     | 10783 | 0.00207697  | 0.472150247  |
| 2934 | WDR4     | 10785 | 0.000176563 | -0.554570923 |
| 2935 | SLC17A3  | 10786 | 0.000726064 | 0.510259535  |
| 2936 | IQGAP2   | 10788 | 9.80E-05    | 0.570990087  |
| 2937 | OR5I1    | 10798 | 1.69E-10    | 0.802749715  |
| 2938 | SEC24A   | 10802 | 0.001036725 | -0.497736472 |
| 2939 | CCR9     | 10803 | 0.009224783 | 0.408658864  |
| 2940 | STARD10  | 10809 | 0.003280181 | -0.454169127 |
| 2941 | NOXA1    | 10811 | 0.006631863 | -0.424157671 |
| 2942 | Unknown  | 10816 | 5.01E-08    | 0.723858892  |
| 2943 | FRS2     | 10818 | 5.26E-08    | 0.723121149  |
| 2944 | EPAG     | 10824 | 3.90E-10    | 0.791475201  |
| 2945 | NEU3     | 10825 | 4.76E-10    | 0.788828807  |
| 2946 | C5orf4   | 10826 | 1.64E-06    | 0.663912407  |
| 2947 | C7orf16  | 10842 | 4.55E-10    | 0.789387866  |
| 2948 | TUBGCP2  | 10844 | 0.006673873 | -0.423867065 |
| 2949 | PDE10A   | 10846 | 0.000121351 | 0.565063201  |
| 2950 | PPP1R13L | 10848 | 0.004038841 | 0.445516739  |
| 2951 | CCL27    | 10850 | 2.03E-06    | 0.659750045  |
| 2952 | SLC26A1  | 10861 | 0.007897257 | -0.416112297 |
| 2953 | TSPAN9   | 10867 | 0.007537134 | -0.418261476 |
| 2954 | USP19    | 10869 | 4.37E-08    | -0.726002531 |
| 2955 | FAM12A   | 10876 | 4.06E-07    | 0.689448622  |
| 2956 | Unknown  | 10877 | 1.03E-05    | 0.625994486  |
| 2957 | SMR3B    | 10879 | 6.99E-11    | 0.814634423  |
| 2958 | NPFFR2   | 10886 | 6.67E-09    | 0.753607113  |
| 2959 | RAB10    | 10890 | 0.001534772 | -0.483539931 |
| 2960 | MMP24    | 10893 | 0.004513574 | 0.440823949  |
| 2961 | PPBPL2   | 10895 | 0.008849085 | 0.410683964  |
| 2962 | OCLM     | 10896 | 1.16E-08    | 0.745881317  |
| 2963 | YIF1A    | 10897 | 0.002828346 | -0.460105127 |
| 2964 | JTB      | 10899 | 2.98E-06    | -0.652161259 |

|      |          |       |             |              |
|------|----------|-------|-------------|--------------|
| 2965 | RUNDC3A  | 10900 | 4.11E-09    | 0.760301901  |
| 2966 | BRD8     | 10902 | 7.38E-05    | -0.578449525 |
| 2967 | BLCAP    | 10904 | 4.54E-05    | -0.590940164 |
| 2968 | MAN1A2   | 10905 | 1.65E-05    | 0.615321404  |
| 2969 | TRAFD1   | 10906 | 5.27E-08    | 0.723054669  |
| 2970 | TXNL4A   | 10907 | 0.000806319 | -0.506712559 |
| 2971 | SUGT1    | 10910 | 0.000543893 | -0.520040821 |
| 2972 | UTS2     | 10911 | 2.33E-05    | 0.607281853  |
| 2973 | PAPOLA   | 10914 | 0.003046787 | -0.457191821 |
| 2974 | MAGED2   | 10916 | 0.000631594 | -0.515038329 |
| 2975 | RNPS1    | 10921 | 0.000296358 | -0.539307004 |
| 2976 | FASTK    | 10922 | 1.87E-07    | -0.702820362 |
| 2977 | SPIN1    | 10927 | 4.64E-06    | -0.643116017 |
| 2978 | RALBP1   | 10928 | 0.000919252 | -0.502053015 |
| 2979 | SFRS2B   | 10929 | 0.000667613 | -0.513127611 |
| 2980 | APOBEC2  | 10930 | 2.10E-10    | 0.799723972  |
| 2981 | PRDX3    | 10935 | 0.002431204 | -0.466192353 |
| 2982 | GPR75    | 10936 | 0.003586931 | 0.450502663  |
| 2983 | EHD1     | 10938 | 0.003530972 | -0.451167209 |
| 2984 | AFG3L2   | 10939 | 0.000400732 | -0.52986906  |
| 2985 | POP1     | 10940 | 2.25E-05    | 0.60809977   |
| 2986 | KDELR1   | 10945 | 0.000202895 | -0.550563931 |
| 2987 | SF3A3    | 10946 | 0.008918172 | -0.410294183 |
| 2988 | STARD3   | 10948 | 2.42E-07    | 0.698371034  |
| 2989 | BTG3     | 10950 | 0.000648075 | -0.514199789 |
| 2990 | SEC61B   | 10952 | 7.46E-05    | -0.578170597 |
| 2991 | TMED2    | 10959 | 0.005614214 | -0.431489324 |
| 2992 | ERP29    | 10961 | 0.004580936 | -0.440197525 |
| 2993 | RAB40B   | 10966 | 0.002348104 | -0.467540509 |
| 2994 | EBNA1BP2 | 10969 | 0.003870747 | -0.447284752 |
| 2995 | TMED10   | 10972 | 0.000152964 | -0.558634542 |
| 2996 | UQCR     | 10975 | 0.000112474 | -0.567174512 |
| 2997 | RAB32    | 10981 | 1.27E-10    | 0.806513636  |
| 2998 | MAPRE2   | 10982 | 1.07E-07    | 0.711938322  |
| 2999 | CCNI     | 10983 | 0.000582009 | -0.517833335 |
| 3000 | COPS5    | 10987 | 2.48E-05    | -0.605750925 |
| 3001 | IMMT     | 10989 | 1.07E-05    | -0.625101228 |
| 3002 | LILRB5   | 10990 | 0.003212024 | -0.455032517 |
| 3003 | SF3B2    | 10992 | 6.48E-07    | -0.681138937 |
| 3004 | SDS      | 10993 | 3.96E-10    | 0.791304119  |
| 3005 | ILVBL    | 10994 | 0.008168373 | -0.414468813 |
| 3006 | SPINK5   | 11005 | 2.25E-05    | 0.608085873  |
| 3007 | IL24     | 11009 | 1.16E-05    | 0.623345373  |
| 3008 | TMED1    | 11018 | 1.01E-05    | 0.626359347  |
| 3009 | Unknown  | 11024 | 3.28E-06    | 0.650210365  |

|      |           |       |             |              |
|------|-----------|-------|-------------|--------------|
| 3010 | DSTN      | 11034 | 0.002715239 | -0.461722502 |
| 3011 | GTF2A1L   | 11036 | 9.89E-06    | 0.62691578   |
| 3012 | SMA4      | 11039 | 0.008958102 | 0.41007601   |
| 3013 | MID2      | 11043 | 0.000543103 | 0.520093963  |
| 3014 | POLS      | 11044 | 9.21E-05    | -0.572633351 |
| 3015 | SLC35D2   | 11046 | 1.83E-05    | -0.612958682 |
| 3016 | CPSF6     | 11052 | 0.000658988 | -0.513581066 |
| 3017 | ZBPB      | 11055 | 0.007044629 | 0.421420815  |
| 3018 | WWP2      | 11060 | 0.001862181 | -0.47620488  |
| 3019 | CEP110    | 11064 | 5.21E-08    | 0.723253937  |
| 3020 | U1SNRNPBP | 11066 | 0.000499161 | -0.522856012 |
| 3021 | CYB561D2  | 11068 | 0.003251997 | -0.454538827 |
| 3022 | TMEM115   | 11070 | 0.007176016 | 0.420607146  |
| 3023 | TRIM31    | 11074 | 8.95E-09    | 0.749451481  |
| 3024 | STMN2     | 11075 | 1.46E-09    | 0.774036512  |
| 3025 | HSF2BP    | 11077 | 8.07E-06    | 0.631430247  |
| 3026 | RER1      | 11079 | 0.001034115 | -0.497835949 |
| 3027 | DIDO1     | 11083 | 0.002503977 | -0.464982579 |
| 3028 | ADAM30    | 11085 | 1.22E-09    | 0.776444858  |
| 3029 | WDR5      | 11091 | 1.40E-05    | 0.619165473  |
| 3030 | ADAMTS13  | 11093 | 0.000281786 | 0.540824163  |
| 3031 | HNRPUL1   | 11100 | 0.003040996 | -0.457268146 |
| 3032 | KRR1      | 11103 | 0.005143233 | -0.435257061 |
| 3033 | KATNA1    | 11104 | 0.004938017 | -0.4370252   |
| 3034 | FGFR1OP   | 11116 | 0.001899348 | -0.475451657 |
| 3035 | EMILIN1   | 11117 | 2.98E-07    | 0.694774397  |
| 3036 | PTPRT     | 11122 | 3.27E-09    | 0.76340887   |
| 3037 | CD160     | 11126 | 0.003518262 | 0.451320462  |
| 3038 | POLR3A    | 11128 | 1.26E-05    | 0.621450749  |
| 3039 | SFRS16    | 11129 | 4.15E-11    | 0.822780618  |
| 3040 | CAPN10    | 11132 | 0.000844786 | 0.505039604  |
| 3041 | SLC7A9    | 11136 | 1.08E-09    | 0.778171392  |
| 3042 | PWP1      | 11137 | 0.003918035 | -0.446752365 |
| 3043 | TBC1D8    | 11138 | 0.001654308 | -0.48073936  |
| 3044 | CDC37     | 11140 | 0.007459231 | -0.418761844 |
| 3045 | PKIG      | 11142 | 0.005095479 | -0.435657982 |
| 3046 | MYST2     | 11143 | 2.31E-07    | 0.699181283  |
| 3047 | DMC1      | 11144 | 1.35E-07    | 0.708208551  |
| 3048 | HRASLS3   | 11145 | 0.007336777 | -0.419525128 |
| 3049 | GLMN      | 11146 | 0.00014172  | 0.560774047  |
| 3050 | HHLA3     | 11147 | 8.56E-06    | 0.630154324  |
| 3051 | WDR45     | 11152 | 5.00E-06    | -0.641551769 |
| 3052 | HYPE      | 11153 | 0.000276395 | 0.541411626  |
| 3053 | AP4S1     | 11154 | 4.99E-05    | 0.588529622  |
| 3054 | LDB3      | 11155 | 2.58E-07    | 0.697307928  |

|      |         |       |             |              |
|------|---------|-------|-------------|--------------|
| 3055 | LSM6    | 11157 | 0.004001486 | -0.445927814 |
| 3056 | NUDT6   | 11162 | 2.73E-08    | 0.733173297  |
| 3057 | NUDT5   | 11164 | 0.007045612 | -0.421410267 |
| 3058 | NUDT3   | 11165 | 0.00963653  | 0.406606872  |
| 3059 | SOX21   | 11166 | 0.008911061 | 0.410341164  |
| 3060 | ADAMTS6 | 11174 | 0.002849445 | 0.459835042  |
| 3061 | BAZ2A   | 11176 | 0.00296182  | -0.458306668 |
| 3062 | LZTS1   | 11178 | 2.88E-07    | 0.69544508   |
| 3063 | MAP4K5  | 11183 | 0.005132155 | -0.435352173 |
| 3064 | RASSF1  | 11186 | 1.03E-07    | 0.712553487  |
| 3065 | PKP3    | 11187 | 0.00103846  | -0.497679894 |
| 3066 | NISCH   | 11188 | 0.002647533 | -0.462758098 |
| 3067 | PTENP1  | 11191 | 0.000158274 | 0.557662174  |
| 3068 | KLK8    | 11202 | 0.002945793 | -0.458518048 |
| 3069 | AKAP11  | 11215 | 0.005313894 | -0.433843079 |
| 3070 | DDX20   | 11218 | 1.41E-08    | 0.743083343  |
| 3071 | MRPL3   | 11222 | 0.002385194 | -0.466959242 |
| 3072 | RPL35   | 11224 | 4.48E-05    | -0.591294821 |
| 3073 | GALNT5  | 11227 | 0.000111958 | 0.567299594  |
| 3074 | RNF24   | 11237 | 0.006792688 | -0.423074497 |
| 3075 | CA5B    | 11238 | 1.73E-10    | 0.802249142  |
| 3076 | PADI2   | 11240 | 3.30E-07    | 0.69305497   |
| 3077 | PMF1    | 11243 | 0.002306224 | -0.468175092 |
| 3078 | NXPH4   | 11247 | 1.03E-09    | 0.778759443  |
| 3079 | NXPH3   | 11248 | 1.57E-10    | 0.803814548  |
| 3080 | Unknown | 11252 | 0.00140489  | -0.486817532 |
| 3081 | MAN1B1  | 11253 | 3.33E-05    | -0.598662242 |
| 3082 | HRH3    | 11255 | 0.000191859 | 0.552194597  |
| 3083 | XPOT    | 11260 | 0.001816179 | -0.47717663  |
| 3084 | CHP     | 11261 | 3.35E-05    | -0.598478053 |
| 3085 | DUSP12  | 11266 | 0.007909628 | -0.416040953 |
| 3086 | SNF8    | 11267 | 0.001844063 | -0.476583115 |
| 3087 | NRM     | 11270 | 1.45E-07    | 0.70701427   |
| 3088 | ATXN2L  | 11273 | 9.21E-11    | 0.810868348  |
| 3089 | KLHL2   | 11275 | 0.000421545 | -0.528271482 |
| 3090 | AP1GBP1 | 11276 | 0.006803385 | -0.422998809 |
| 3091 | TREX1   | 11277 | 0.007701934 | -0.41724168  |
| 3092 | SCN11A  | 11280 | 5.20E-11    | 0.819825331  |
| 3093 | POU6F2  | 11281 | 6.23E-07    | 0.681872831  |
| 3094 | MGAT4B  | 11282 | 0.000933247 | -0.501489791 |
| 3095 | PNKP    | 11284 | 0.007939948 | -0.41585564  |
| 3096 | B4GALT7 | 11285 | 8.17E-06    | -0.631153112 |
| 3097 | SLCO2B1 | 11309 | 0.000215172 | 0.548851074  |
| 3098 | VPS45   | 11311 | 0.009685316 | -0.406363501 |
| 3099 | CD300A  | 11314 | 1.13E-09    | 0.777489347  |

|      |           |       |             |              |
|------|-----------|-------|-------------|--------------|
| 3100 | PARK7     | 11315 | 0.001414411 | -0.486532101 |
| 3101 | RBPJL     | 11317 | 8.00E-10    | 0.782200883  |
| 3102 | GPR182    | 11318 | 7.87E-11    | 0.81307076   |
| 3103 | DDX42     | 11325 | 0.002399669 | -0.466688637 |
| 3104 | FKBP9     | 11328 | 7.64E-05    | -0.577573573 |
| 3105 | PHB2      | 11331 | 0.000499202 | -0.522847706 |
| 3106 | PDAP1     | 11333 | 0.000151873 | 0.558871005  |
| 3107 | TUSC2     | 11334 | 2.70E-05    | -0.603667976 |
| 3108 | EXOC3     | 11336 | 0.000451488 | -0.52608216  |
| 3109 | GABARAP   | 11337 | 9.11E-05    | -0.572955346 |
| 3110 | U2AF2     | 11338 | 0.00431849  | -0.442688177 |
| 3111 | EXOSC8    | 11340 | 0.005429265 | -0.432885508 |
| 3112 | RNF13     | 11342 | 0.000886472 | -0.503362911 |
| 3113 | TWF2      | 11344 | 0.002015651 | -0.473239317 |
| 3114 | GABARAPL2 | 11345 | 0.004262637 | -0.443262202 |
| 3115 | CASC3     | 22794 | 0.001802762 | -0.477455491 |
| 3116 | LAMB4     | 22798 | 2.14E-09    | 0.768936676  |
| 3117 | CLCA4     | 22802 | 3.56E-10    | 0.792747384  |
| 3118 | COPZ1     | 22818 | 0.000570734 | -0.518443175 |
| 3119 | COPG      | 22820 | 0.004906827 | -0.437288659 |
| 3120 | MTF2      | 22823 | 0.0025563   | -0.464177053 |
| 3121 | DNAJC8    | 22826 | 0.004869969 | -0.437617009 |
| 3122 | PUF60     | 22827 | 0.001564235 | -0.482784475 |
| 3123 | RBM16     | 22828 | 0.005788699 | -0.430143545 |
| 3124 | NLGN4Y    | 22829 | 1.83E-07    | 0.703175366  |
| 3125 | RNF44     | 22838 | 2.79E-05    | -0.60289163  |
| 3126 | ZNF507    | 22847 | 8.96E-06    | 0.629127219  |
| 3127 | ADNP2     | 22850 | 0.000812496 | -0.506405344 |
| 3128 | LMTK2     | 22853 | 0.001357654 | -0.488127488 |
| 3129 | NLRP1     | 22861 | 0.002060416 | 0.472446454  |
| 3130 | R3HDM2    | 22864 | 8.08E-06    | -0.631396711 |
| 3131 | SLITRK3   | 22865 | 2.38E-10    | 0.797916876  |
| 3132 | FASTKD2   | 22868 | 0.000137381 | -0.561631294 |
| 3133 | SAPS1     | 22870 | 0.001440078 | 0.485897863  |
| 3134 | SEC31A    | 22872 | 3.45E-05    | -0.597786379 |
| 3135 | INPP5F    | 22876 | 0.001200396 | -0.492530087 |
| 3136 | KIAA1012  | 22878 | 0.007190571 | -0.42051882  |
| 3137 | CLSTN1    | 22883 | 0.000126907 | -0.563800782 |
| 3138 | ABLIM3    | 22885 | 2.40E-05    | 0.606540433  |
| 3139 | KIAA0907  | 22889 | 0.003324833 | -0.453618142 |
| 3140 | ZBTB1     | 22890 | 0.000139197 | -0.561274032 |
| 3141 | DIS3      | 22894 | 0.008923413 | 0.410260652  |
| 3142 | CEP164    | 22897 | 0.009071109 | -0.40944573  |
| 3143 | ARHGEF15  | 22899 | 7.70E-10    | 0.782717301  |
| 3144 | RUFY3     | 22902 | 0.007929349 | -0.415923218 |

|      |          |       |             |              |
|------|----------|-------|-------------|--------------|
| 3145 | BTBD3    | 22903 | 0.006430271 | -0.425545434 |
| 3146 | DHX30    | 22907 | 0.000316955 | -0.537265052 |
| 3147 | SACM1L   | 22908 | 8.68E-06    | -0.629833324 |
| 3148 | MTMR15   | 22909 | 0.006325403 | -0.426220005 |
| 3149 | RALY     | 22913 | 0.001786758 | -0.477777252 |
| 3150 | KLRK1    | 22914 | 4.60E-07    | 0.687217585  |
| 3151 | ZP1      | 22917 | 0.000813493 | 0.506351639  |
| 3152 | MSRB2    | 22921 | 0.006433826 | -0.425519271 |
| 3153 | ATF6     | 22926 | 5.89E-10    | 0.786038803  |
| 3154 | HABP4    | 22927 | 0.002696412 | 0.461985905  |
| 3155 | SEPHS1   | 22929 | 6.36E-05    | 0.582322765  |
| 3156 | RAB3GAP1 | 22930 | 0.000140002 | -0.561116121 |
| 3157 | RAB18    | 22931 | 0.000765929 | -0.508491614 |
| 3158 | SIRT2    | 22933 | 0.00079384  | 0.507232111  |
| 3159 | RPIA     | 22934 | 6.33E-05    | -0.582428689 |
| 3160 | ELL2     | 22936 | 2.50E-05    | 0.605573865  |
| 3161 | SCAP     | 22937 | 0.000658277 | -0.513622568 |
| 3162 | SNW1     | 22938 | 0.000569761 | -0.518503721 |
| 3163 | DKK1     | 22943 | 0.002638132 | 0.462894852  |
| 3164 | KIN      | 22944 | 0.005751105 | 0.430423583  |
| 3165 | SLC4A1AP | 22950 | 0.000720718 | -0.510509674 |
| 3166 | P2RX2    | 22953 | 4.12E-08    | 0.726897931  |
| 3167 | SCMH1    | 22955 | 0.00150112  | -0.484333131 |
| 3168 | PAXIP1   | 22976 | 0.001463727 | -0.485282664 |
| 3169 | EFR3B    | 22979 | 5.26E-10    | 0.787568822  |
| 3170 | MAST1    | 22983 | 2.43E-07    | 0.69830158   |
| 3171 | PDCD11   | 22984 | 0.005043861 | -0.436116161 |
| 3172 | ACIN1    | 22985 | 0.005021979 | -0.436307286 |
| 3173 | AZI1     | 22994 | 0.001610237 | -0.481737109 |
| 3174 | RIMS1    | 22999 | 3.56E-06    | 0.648567881  |
| 3175 | KIAA0265 | 23008 | 0.003624718 | -0.450064545 |
| 3176 | Unknown  | 23016 | 0.000584768 | -0.517683434 |
| 3177 | CNOT1    | 23019 | 0.000223223 | -0.547778398 |
| 3178 | ASCC3L1  | 23020 | 1.18E-06    | -0.670030684 |
| 3179 | TMCC1    | 23023 | 4.62E-05    | -0.590442806 |
| 3180 | JMJD2B   | 23030 | 1.65E-05    | 0.615414936  |
| 3181 | MAST3    | 23031 | 0.000659152 | -0.513564344 |
| 3182 | USP33    | 23032 | 0.000617085 | -0.515873198 |
| 3183 | PHLPL    | 23035 | 0.000282123 | 0.540767796  |
| 3184 | ZNF292   | 23036 | 0.009270608 | -0.408427036 |
| 3185 | MYT1L    | 23040 | 6.00E-08    | 0.721016584  |
| 3186 | TNIK     | 23043 | 3.49E-09    | 0.762561745  |
| 3187 | FNBP1    | 23048 | 0.003794969 | -0.448158497 |
| 3188 | KIAA0913 | 23053 | 0.002219098 | -0.469650709 |
| 3189 | NCOA6    | 23054 | 0.00025846  | -0.543385516 |

|      |          |       |             |              |
|------|----------|-------|-------------|--------------|
| 3190 | ZNF609   | 23060 | 0.001015685 | 0.498490814  |
| 3191 | TBC1D9B  | 23061 | 0.000169574 | -0.555704342 |
| 3192 | WAPAL    | 23063 | 0.001229468 | -0.491704257 |
| 3193 | KIAA0090 | 23065 | 0.006170827 | -0.427284451 |
| 3194 | SETD1B   | 23067 | 0.002576083 | -0.463862523 |
| 3195 | KIAA0082 | 23070 | 0.008849085 | -0.410679234 |
| 3196 | TXNDC4   | 23071 | 0.000291185 | -0.539808238 |
| 3197 | RRP1B    | 23076 | 7.84E-05    | -0.57693097  |
| 3198 | MYCBP2   | 23077 | 0.007495638 | -0.418506236 |
| 3199 | KIAA0241 | 23080 | 0.001965618 | -0.474194509 |
| 3200 | PPRC1    | 23082 | 0.003380175 | -0.452935261 |
| 3201 | ERC1     | 23085 | 2.15E-07    | 0.700427888  |
| 3202 | ZC3H13   | 23091 | 0.008834594 | -0.410759517 |
| 3203 | CDC2L6   | 23097 | 0.005307841 | -0.433901222 |
| 3204 | DDN      | 23109 | 6.46E-10    | 0.784957029  |
| 3205 | ATG2A    | 23130 | 3.50E-05    | -0.597438305 |
| 3206 | GPATCH8  | 23131 | 1.90E-05    | 0.612085145  |
| 3207 | ZC3H3    | 23144 | 1.05E-09    | 0.778472076  |
| 3208 | FCHO1    | 23149 | 0.000317805 | -0.537186869 |
| 3209 | FRMD4B   | 23150 | 0.003109391 | -0.456387844 |
| 3210 | DIP      | 23151 | 8.81E-05    | 0.573829057  |
| 3211 | NCDN     | 23154 | 0.000401924 | -0.529769171 |
| 3212 | SNX13    | 23161 | 0.003212024 | -0.455034333 |
| 3213 | RTF1     | 23168 | 0.000627083 | -0.51529811  |
| 3214 | GPD1L    | 23171 | 0.000122935 | -0.564679799 |
| 3215 | METAP1   | 23173 | 0.000175008 | -0.554815062 |
| 3216 | ZCCHC14  | 23174 | 0.002696578 | -0.461972975 |
| 3217 | 8-Sep    | 23176 | 0.005083919 | -0.435767749 |
| 3218 | CEP68    | 23177 | 0.006519085 | -0.424931288 |
| 3219 | DIP2A    | 23181 | 0.006256526 | -0.426706744 |
| 3220 | ANKRD15  | 23189 | 0.000598164 | -0.516904116 |
| 3221 | UBXD2    | 23190 | 3.50E-05    | -0.597420915 |
| 3222 | CYFIP1   | 23191 | 0.001997249 | -0.473572991 |
| 3223 | ATG4B    | 23192 | 0.000327547 | -0.536287465 |
| 3224 | MDN1     | 23195 | 0.005286988 | -0.434077884 |
| 3225 | FAM120A  | 23196 | 0.000795001 | -0.507177266 |
| 3226 | PSME4    | 23198 | 0.006759878 | -0.423295702 |
| 3227 | ATP11B   | 23200 | 6.40E-06    | 0.636399797  |
| 3228 | PLEKHM2  | 23207 | 0.00018197  | -0.553682719 |
| 3229 | SYT11    | 23208 | 1.42E-09    | 0.774507341  |
| 3230 | RRS1     | 23212 | 2.21E-06    | 0.658141784  |
| 3231 | XPO6     | 23214 | 4.54E-05    | -0.590995479 |
| 3232 | BAT2D1   | 23215 | 0.002198617 | -0.469985477 |
| 3233 | DTX4     | 23220 | 0.000605703 | 0.516503123  |
| 3234 | ARHGEF9  | 23229 | 0.002257504 | 0.468959568  |



|      |           |       |             |              |
|------|-----------|-------|-------------|--------------|
| 3235 | SNF1LK2   | 23235 | 0.000152682 | -0.558703548 |
| 3236 | KIAA0922  | 23240 | 4.81E-10    | 0.788650359  |
| 3237 | ANKRD28   | 23243 | 0.000883377 | -0.503487658 |
| 3238 | PDS5A     | 23244 | 0.000169772 | -0.555662192 |
| 3239 | BOP1      | 23246 | 0.002495217 | -0.465122128 |
| 3240 | KIAA0460  | 23248 | 0.000456653 | 0.525722811  |
| 3241 | OTUD3     | 23252 | 5.29E-08    | 0.723002357  |
| 3242 | SCFD1     | 23256 | 0.000566233 | -0.518692887 |
| 3243 | CAMTA1    | 23261 | 0.003324399 | -0.453628061 |
| 3244 | MCF2L     | 23263 | 4.42E-08    | 0.725820944  |
| 3245 | MGA       | 23269 | 7.25E-07    | 0.679055107  |
| 3246 | TSPYL4    | 23270 | 1.67E-05    | -0.615150594 |
| 3247 | CAMSAP1L1 | 23271 | 0.006147406 | -0.427464275 |
| 3248 | LPHN3     | 23284 | 1.84E-07    | 0.703059256  |
| 3249 | KIAA1107  | 23285 | 0.000265817 | 0.542545039  |
| 3250 | AGTPBP1   | 23287 | 7.15E-06    | 0.634040987  |
| 3251 | FBXW11    | 23291 | 0.00124912  | -0.491111159 |
| 3252 | SMG6      | 23293 | 3.93E-06    | 0.646547681  |
| 3253 | ANKS1A    | 23294 | 0.005666511 | -0.431078633 |
| 3254 | MGRN1     | 23295 | 0.0059645   | -0.428756313 |
| 3255 | WSCD1     | 23302 | 0.000357594 | 0.533467812  |
| 3256 | ACSL6     | 23305 | 2.27E-10    | 0.798671094  |
| 3257 | ICOSLG    | 23308 | 1.30E-11    | 0.846045608  |
| 3258 | SIN3B     | 23309 | 1.05E-05    | 0.625491234  |
| 3259 | USP22     | 23326 | 7.54E-05    | -0.577899092 |
| 3260 | KIAA0984  | 23329 | 8.39E-09    | 0.750356247  |
| 3261 | TTC28     | 23331 | 0.001617331 | -0.48158542  |
| 3262 | CLASP1    | 23332 | 0.003909972 | 0.446846861  |
| 3263 | DPY19L1   | 23333 | 1.81E-09    | 0.771203104  |
| 3264 | PHF15     | 23338 | 0.009648173 | -0.406543157 |
| 3265 | VPS39     | 23339 | 0.00140431  | -0.48683613  |
| 3266 | FAM62A    | 23344 | 0.00092714  | -0.501744576 |
| 3267 | SMCHD1    | 23347 | 0.008077391 | -0.415035861 |
| 3268 | DOCK9     | 23348 | 0.002273764 | -0.468694616 |
| 3269 | SR140     | 23350 | 0.004805681 | -0.438202365 |
| 3270 | UBR4      | 23352 | 0.00033502  | -0.535536689 |
| 3271 | UNC84A    | 23353 | 1.34E-07    | -0.708363355 |
| 3272 | KIAA0841  | 23354 | 6.96E-06    | 0.634603816  |
| 3273 | ANGEL1    | 23357 | 0.004569283 | -0.440320646 |
| 3274 | USP24     | 23358 | 0.001031668 | -0.497930778 |
| 3275 | LARP1     | 23367 | 1.34E-05    | -0.620066254 |
| 3276 | PUM2      | 23369 | 0.009897829 | -0.405287361 |
| 3277 | CRTC1     | 23373 | 3.84E-08    | 0.727924062  |
| 3278 | KIAA0776  | 23376 | 0.000560099 | -0.519068692 |
| 3279 | KIAA0947  | 23379 | 0.000527151 | -0.521046756 |

|      |          |       |             |              |
|------|----------|-------|-------------|--------------|
| 3280 | SMG5     | 23381 | 7.41E-08    | 0.717707495  |
| 3281 | KIAA0892 | 23383 | 0.002148031 | -0.470848824 |
| 3282 | NUDCD3   | 23386 | 0.00453698  | -0.440610283 |
| 3283 | KIAA0999 | 23387 | 0.009413622 | -0.407661259 |
| 3284 | KIAA0368 | 23392 | 0.000379194 | -0.531592611 |
| 3285 | ADNP     | 23394 | 8.00E-05    | -0.576355806 |
| 3286 | LARS2    | 23395 | 1.35E-07    | 0.708248209  |
| 3287 | ATP13A2  | 23400 | 0.000276551 | -0.541378214 |
| 3288 | FRAT2    | 23401 | 0.009976242 | -0.40492666  |
| 3289 | SIRT3    | 23410 | 7.13E-06    | 0.634100604  |
| 3290 | SIRT1    | 23411 | 0.001391513 | -0.487180132 |
| 3291 | COMMD3   | 23412 | 5.90E-06    | -0.638118086 |
| 3292 | FREQ     | 23413 | 1.61E-09    | 0.77280365   |
| 3293 | KCNH4    | 23415 | 0.003413834 | 0.452533216  |
| 3294 | MLYCD    | 23417 | 1.57E-08    | 0.741554764  |
| 3295 | CRB1     | 23418 | 1.87E-05    | 0.612493085  |
| 3296 | TMED3    | 23423 | 0.001075582 | -0.496398299 |
| 3297 | TDRD7    | 23424 | 0.001145776 | -0.49418737  |
| 3298 | GRIP1    | 23426 | 0.005490924 | -0.432398456 |
| 3299 | SLC7A8   | 23428 | 0.000964344 | 0.500324276  |
| 3300 | RYBP     | 23429 | 3.71E-07    | -0.691092305 |
| 3301 | AP4E1    | 23431 | 5.53E-09    | 0.756194196  |
| 3302 | RHOQ     | 23433 | 0.000346143 | 0.534505028  |
| 3303 | C3orf27  | 23434 | 2.46E-05    | 0.605989445  |
| 3304 | TARDBP   | 23435 | 0.000156214 | -0.558055179 |
| 3305 | HARS2    | 23438 | 0.001486086 | -0.484702384 |
| 3306 | OTP      | 23440 | 0.001140471 | 0.494352798  |
| 3307 | SF3B1    | 23451 | 0.000127166 | -0.563744161 |
| 3308 | ABCB9    | 23457 | 1.48E-07    | 0.706727992  |
| 3309 | ABCA6    | 23460 | 6.75E-07    | 0.680409596  |
| 3310 | GCAT     | 23464 | 0.000249559 | -0.544463378 |
| 3311 | PHF3     | 23469 | 0.000297284 | -0.539198992 |
| 3312 | ETHE1    | 23474 | 3.63E-05    | 0.596503151  |
| 3313 | BRD4     | 23476 | 0.001039532 | -0.497641869 |
| 3314 | ISCU     | 23479 | 0.000743308 | -0.509501874 |
| 3315 | SEC61G   | 23480 | 0.001651046 | -0.480808191 |
| 3316 | TGDS     | 23483 | 2.00E-08    | 0.738025581  |
| 3317 | LEPROTL1 | 23484 | 0.001561066 | 0.482882438  |
| 3318 | CBX7     | 23492 | 1.79E-10    | 0.801879769  |
| 3319 | MACF1    | 23499 | 3.66E-06    | -0.647992817 |
| 3320 | ZFYVE26  | 23503 | 1.95E-10    | 0.800756654  |
| 3321 | RIMBP2   | 23504 | 5.59E-05    | 0.585715042  |
| 3322 | TMEM131  | 23505 | 9.37E-05    | -0.572179477 |
| 3323 | KIAA0240 | 23506 | 0.003224875 | -0.454861765 |
| 3324 | KCTD2    | 23510 | 0.001368382 | -0.487823871 |

|      |          |       |             |              |
|------|----------|-------|-------------|--------------|
| 3325 | Unknown  | 23511 | 0.002148173 | -0.470841161 |
| 3326 | SUZ12    | 23512 | 0.001236171 | -0.491507365 |
| 3327 | SCRIB    | 23513 | 0.005866575 | -0.429507655 |
| 3328 | ANP32C   | 23520 | 1.26E-08    | 0.744700541  |
| 3329 | RPL13A   | 23521 | 2.38E-05    | -0.606787568 |
| 3330 | PIK3R5   | 23533 | 9.23E-05    | 0.572582123  |
| 3331 | OR52A1   | 23538 | 1.39E-07    | 0.707760043  |
| 3332 | SEC14L2  | 23541 | 0.000531495 | 0.52077256   |
| 3333 | SEZ6L    | 23544 | 2.29E-07    | 0.699297016  |
| 3334 | SYNGR4   | 23546 | 4.41E-11    | 0.821918119  |
| 3335 | LILRA4   | 23547 | 0.001177698 | 0.493210358  |
| 3336 | DNPEP    | 23549 | 0.000256208 | 0.543647284  |
| 3337 | PSD4     | 23550 | 4.36E-09    | 0.759565064  |
| 3338 | RASD2    | 23551 | 0.007628182 | 0.417703008  |
| 3339 | CCRK     | 23552 | 2.00E-05    | 0.610878668  |
| 3340 | SNAPIN   | 23557 | 0.000886463 | -0.503371841 |
| 3341 | WBP2     | 23558 | 0.001335532 | -0.488720782 |
| 3342 | GTPBP4   | 23560 | 0.001524148 | -0.483771873 |
| 3343 | CLDN14   | 23562 | 1.32E-05    | 0.62038249   |
| 3344 | ARL2BP   | 23568 | 3.07E-09    | 0.764247844  |
| 3345 | PADI4    | 23569 | 7.75E-07    | 0.677863924  |
| 3346 | CDC42EP4 | 23580 | 0.000255579 | -0.543724507 |
| 3347 | CASP14   | 23581 | 4.08E-07    | 0.689370233  |
| 3348 | KLHDC2   | 23588 | 1.05E-05    | -0.625514414 |
| 3349 | LEMD3    | 23592 | 0.002991657 | -0.457895699 |
| 3350 | ORC3L    | 23595 | 0.001970877 | -0.474090628 |
| 3351 | PATZ1    | 23598 | 5.85E-05    | -0.584447835 |
| 3352 | CD2AP    | 23607 | 0.0076713   | -0.417440391 |
| 3353 | MKRN1    | 23608 | 8.00E-05    | -0.576361184 |
| 3354 | PYY2     | 23615 | 0.000590858 | 0.517333429  |
| 3355 | TSSK2    | 23617 | 0.000111852 | 0.567335269  |
| 3356 | Unknown  | 23619 | 1.76E-09    | 0.77157996   |
| 3357 | NTSR2    | 23620 | 0.00591211  | 0.42917621   |
| 3358 | RUSC1    | 23623 | 1.27E-05    | 0.621274302  |
| 3359 | CBLC     | 23624 | 0.007963534 | -0.415719281 |
| 3360 | PRND     | 23627 | 0.000436579 | 0.527167053  |
| 3361 | CA14     | 23632 | 5.39E-08    | 0.722722902  |
| 3362 | SSBP2    | 23635 | 2.01E-08    | 0.737953915  |
| 3363 | RABGAP1  | 23637 | 0.000194368 | -0.551788039 |
| 3364 | SNHG1    | 23642 | 0.000315287 | -0.537431596 |
| 3365 | ARFIP2   | 23647 | 8.28E-10    | 0.78177701   |
| 3366 | ZKSCAN5  | 23660 | 0.001119545 | -0.495012463 |
| 3367 | TMEM2    | 23670 | 0.00040068  | 0.529878675  |
| 3368 | SH3BP4   | 23677 | 0.002667302 | -0.462468022 |
| 3369 | C9orf4   | 23732 | 1.72E-07    | 0.704204313  |

|      |              |       |             |              |
|------|--------------|-------|-------------|--------------|
| 3370 | EID1         | 23741 | 0.00154571  | -0.483252814 |
| 3371 | SDF2L1       | 23753 | 0.000199757 | -0.550990844 |
| 3372 | PITPNB       | 23760 | 8.81E-06    | 0.629502745  |
| 3373 | PISD         | 23761 | 4.28E-05    | -0.592400229 |
| 3374 | FLRT1        | 23769 | 0.002241331 | 0.469248697  |
| 3375 | FKBP8        | 23770 | 0.000104788 | 0.56919845   |
| 3376 | BRD1         | 23774 | 8.11E-05    | -0.575984491 |
| 3377 | MTCH1        | 23787 | 4.39E-05    | -0.591766614 |
| 3378 | Unknown      | 24142 | 2.04E-09    | 0.769589795  |
| 3379 | PRPF6        | 24148 | 1.85E-05    | -0.612677418 |
| 3380 | C11orf41     | 25758 | 0.00311229  | 0.456350266  |
| 3381 | CXorf27      | 25763 | 7.37E-06    | 0.633392699  |
| 3382 | HYPK         | 25764 | 2.35E-07    | 0.698911713  |
| 3383 | SLC24A2      | 25769 | 1.14E-08    | 0.746062814  |
| 3384 | C22orf31     | 25770 | 2.55E-09    | 0.766596773  |
| 3385 | C22orf24     | 25775 | 0.00025662  | 0.543598779  |
| 3386 | RIPK5        | 25778 | 0.002692224 | -0.462061742 |
| 3387 | RASGRP3      | 25780 | 1.20E-05    | 0.622684407  |
| 3388 | Unknown      | 25784 | 4.97E-08    | 0.724006818  |
| 3389 | DGCR11       | 25786 | 1.58E-05    | 0.616413374  |
| 3390 | CIZ1         | 25792 | 0.003382503 | -0.452900632 |
| 3391 | FBXO7        | 25793 | 0.000376703 | -0.531795308 |
| 3392 | RHBDD3       | 25807 | 0.000969425 | -0.500142669 |
| 3393 | ATXN10       | 25814 | 0.001666307 | -0.480452053 |
| 3394 | CCRN4L       | 25819 | 1.55E-08    | 0.741775047  |
| 3395 | ARIH1        | 25820 | 0.001961255 | -0.474278187 |
| 3396 | MTO1         | 25821 | 2.74E-06    | 0.65386827   |
| 3397 | DNAJB5       | 25822 | 4.19E-10    | 0.790592638  |
| 3398 | TPSG1        | 25823 | 8.61E-07    | 0.675913423  |
| 3399 | PRDX5        | 25824 | 0.001293066 | -0.489870931 |
| 3400 | BACE2        | 25825 | 0.00296182  | -0.458300891 |
| 3401 | TMEM184B     | 25829 | 0.000582656 | -0.517792932 |
| 3402 | SULT4A1      | 25830 | 1.32E-07    | 0.708523814  |
| 3403 | HECTD1       | 25831 | 0.000205028 | -0.550250398 |
| 3404 | COG4         | 25839 | 0.001047475 | -0.497348385 |
| 3405 | ABTB2        | 25841 | 0.008996825 | -0.409863854 |
| 3406 | LOC25845     | 25845 | 0.004253144 | -0.443374423 |
| 3407 | ANAPC13      | 25847 | 0.000905133 | -0.502655429 |
| 3408 | WDR40A       | 25853 | 0.00603894  | -0.428207214 |
| 3409 | BRMS1        | 25855 | 5.84E-06    | 0.638363893  |
| 3410 | DKFZP566E164 | 25858 | 2.13E-10    | 0.799544964  |
| 3411 | DFNB31       | 25861 | 0.0008426   | 0.505128251  |
| 3412 | USP49        | 25862 | 2.10E-06    | 0.659085612  |
| 3413 | ABHD14A      | 25864 | 0.008814092 | -0.41088737  |
| 3414 | PRKD2        | 25865 | 0.001016508 | -0.498451324 |

|      |               |       |             |              |
|------|---------------|-------|-------------|--------------|
| 3415 | C3orf17       | 25871 | 0.000836108 | 0.505392991  |
| 3416 | RPL36         | 25873 | 0.004339219 | -0.442484045 |
| 3417 | BRP44         | 25874 | 0.006193174 | -0.427127299 |
| 3418 | WDSOF1        | 25879 | 0.008342862 | -0.413521388 |
| 3419 | WDR51A        | 25886 | 1.81E-08    | 0.739515666  |
| 3420 | ZNF473        | 25888 | 4.73E-06    | 0.64270725   |
| 3421 | FAM119B       | 25895 | 0.003926902 | 0.446661363  |
| 3422 | HOM-TES-103   | 25900 | 6.66E-06    | 0.635555263  |
| 3423 | CNOT10        | 25904 | 0.009754855 | -0.40599982  |
| 3424 | C1orf43       | 25912 | 3.80E-05    | -0.595366751 |
| 3425 | C3orf60       | 25915 | 0.006643451 | -0.424067049 |
| 3426 | THUMPD3       | 25917 | 0.002434451 | -0.46613557  |
| 3427 | RP13-122B23.3 | 25920 | 0.000698732 | -0.511614547 |
| 3428 | DKFZP564J086  | 25923 | 0.000858586 | -0.50449839  |
| 3429 | NOL11         | 25926 | 1.12E-05    | -0.624223234 |
| 3430 | PTPN23        | 25930 | 0.000825725 | 0.505816303  |
| 3431 | WWTR1         | 25937 | 0.001480356 | -0.48484705  |
| 3432 | SAMHD1        | 25939 | 0.00253694  | -0.464480959 |
| 3433 | FAM98A        | 25940 | 0.000331322 | -0.535922384 |
| 3434 | RWDD3         | 25950 | 0.00326731  | -0.454348776 |
| 3435 | SFRS18        | 25957 | 0.009358337 | -0.407967985 |
| 3436 | GPR124        | 25960 | 0.00024681  | 0.544816448  |
| 3437 | KIAA1429      | 25962 | 0.000357718 | -0.533452272 |
| 3438 | TMEM87A       | 25963 | 0.000456733 | -0.525711926 |
| 3439 | C2CD2         | 25966 | 0.002845179 | -0.459894604 |
| 3440 | UNC50         | 25972 | 1.16E-07    | -0.710627815 |
| 3441 | MMACHC        | 25974 | 2.15E-10    | 0.799423803  |
| 3442 | NECAP1        | 25977 | 2.77E-10    | 0.795935434  |
| 3443 | C20orf4       | 25980 | 7.04E-05    | 0.579680424  |
| 3444 | DNAH1         | 25981 | 0.001528643 | 0.483672708  |
| 3445 | MIZF          | 25988 | 1.77E-05    | -0.613795919 |
| 3446 | SNED1         | 25992 | 2.54E-07    | 0.697572025  |
| 3447 | HIGD1A        | 25994 | 0.000662437 | -0.513382805 |
| 3448 | REXO2         | 25996 | 0.002464887 | -0.465653187 |
| 3449 | IBTK          | 25998 | 0.001295519 | -0.489800544 |
| 3450 | TBC1D10B      | 26000 | 3.37E-09    | 0.763011318  |
| 3451 | GORASP2       | 26003 | 0.002395803 | -0.466758997 |
| 3452 | C2CD3         | 26005 | 0.00443965  | -0.441494935 |
| 3453 | NELF          | 26012 | 0.003319065 | 0.453689334  |
| 3454 | RPAP1         | 26015 | 1.48E-11    | 0.840812174  |
| 3455 | UPF2          | 26019 | 0.000983794 | -0.499629147 |
| 3456 | LRP10         | 26020 | 0.0009278   | -0.501713787 |
| 3457 | PTCD1         | 26024 | 0.003660896 | -0.449623923 |
| 3458 | ACOT11        | 26027 | 2.81E-08    | 0.732708679  |
| 3459 | ATRNL1        | 26033 | 0.00015971  | 0.557409277  |

|      |          |       |             |              |
|------|----------|-------|-------------|--------------|
| 3460 | PIP3-E   | 26034 | 0.000228749 | 0.54706651   |
| 3461 | CHD5     | 26038 | 8.05E-10    | 0.78211614   |
| 3462 | SS18L1   | 26039 | 0.001381713 | -0.487441494 |
| 3463 | ZNF294   | 26046 | 0.000118149 | -0.565815809 |
| 3464 | CNTNAP2  | 26047 | 7.33E-09    | 0.75232837   |
| 3465 | ZNF500   | 26048 | 0.005714541 | -0.430687811 |
| 3466 | SENP6    | 26054 | 0.001702078 | -0.47966982  |
| 3467 | ANKRD17  | 26057 | 0.001140199 | -0.494365776 |
| 3468 | APPL1    | 26060 | 0.000467327 | -0.525023071 |
| 3469 | LSM14A   | 26065 | 0.000347647 | -0.534356809 |
| 3470 | POLDIP2  | 26073 | 0.000880826 | 0.503579925  |
| 3471 | KLK13    | 26085 | 0.00062689  | 0.515312898  |
| 3472 | GPSM1    | 26086 | 4.34E-08    | 0.726114743  |
| 3473 | HERC4    | 26091 | 0.001243801 | -0.491276881 |
| 3474 | CCDC9    | 26093 | 1.59E-09    | 0.772951907  |
| 3475 | WDR21A   | 26094 | 0.008358249 | -0.413398986 |
| 3476 | C1orf77  | 26097 | 0.003752991 | -0.448624225 |
| 3477 | C1orf144 | 26099 | 7.20E-08    | 0.718169348  |
| 3478 | WIPI2    | 26100 | 1.21E-05    | -0.62244969  |
| 3479 | PYGO1    | 26108 | 7.08E-05    | 0.579553832  |
| 3480 | TANC2    | 26115 | 0.000161217 | 0.557121886  |
| 3481 | WSB1     | 26118 | 0.002473112 | -0.465508562 |
| 3482 | LDLRAP1  | 26119 | 0.000742591 | 0.509550151  |
| 3483 | PRPF31   | 26121 | 3.80E-05    | -0.595364293 |
| 3484 | EPC2     | 26122 | 0.001822859 | -0.477035548 |
| 3485 | TRPC4AP  | 26133 | 0.003374309 | -0.453006061 |
| 3486 | ZBTB20   | 26137 | 0.000346137 | 0.534512441  |
| 3487 | IRF2BP1  | 26145 | 4.42E-07    | 0.687934533  |
| 3488 | PHF19    | 26147 | 2.33E-10    | 0.798255032  |
| 3489 | RIBC2    | 26150 | 0.000205172 | 0.550219678  |
| 3490 | NAT9     | 26151 | 0.00820869  | -0.41425531  |
| 3491 | GTPBP5   | 26164 | 5.00E-06    | 0.641546204  |
| 3492 | SENP3    | 26168 | 0.001774062 | -0.478063057 |
| 3493 | INTS1    | 26173 | 0.00023976  | -0.545688322 |
| 3494 | OR1F2P   | 26184 | 2.79E-06    | 0.653486713  |
| 3495 | OR1C1    | 26188 | 0.002480979 | 0.465374588  |
| 3496 | OR1A2    | 26189 | 2.20E-05    | 0.608654995  |
| 3497 | FBXW2    | 26190 | 0.002377597 | -0.467085234 |
| 3498 | GMEB2    | 26205 | 0.001455934 | -0.485518453 |
| 3499 | OR1J4    | 26219 | 1.24E-06    | 0.669097466  |
| 3500 | ARL5A    | 26225 | 0.002725694 | -0.461570229 |
| 3501 | Unknown  | 26226 | 7.64E-06    | 0.632650827  |
| 3502 | B3GAT3   | 26229 | 4.24E-05    | -0.592646396 |
| 3503 | TIAM2    | 26230 | 6.35E-11    | 0.815923533  |
| 3504 | FBXL4    | 26235 | 0.004010891 | -0.445828191 |

|      |          |       |             |              |
|------|----------|-------|-------------|--------------|
| 3505 | C6orf123 | 26238 | 2.50E-09    | 0.766823375  |
| 3506 | LCE2B    | 26239 | 0.003820153 | 0.447871956  |
| 3507 | OR4C1P   | 26242 | 5.54E-10    | 0.786873452  |
| 3508 | OR2M4    | 26245 | 8.68E-05    | 0.574228021  |
| 3509 | OR2L2    | 26246 | 2.72E-05    | 0.603525454  |
| 3510 | OR2K2    | 26248 | 2.01E-11    | 0.835515253  |
| 3511 | KCNG2    | 26251 | 2.87E-06    | 0.65295513   |
| 3512 | OPTC     | 26254 | 3.09E-06    | 0.651396673  |
| 3513 | CABYR    | 26256 | 6.58E-11    | 0.815320394  |
| 3514 | NKX2-8   | 26257 | 0.006189532 | -0.427159916 |
| 3515 | PLDN     | 26258 | 0.000192192 | -0.552102215 |
| 3516 | TSPAN17  | 26262 | 0.000810845 | -0.506494593 |
| 3517 | FBXO10   | 26267 | 5.80E-09    | 0.755546473  |
| 3518 | FBXO9    | 26268 | 0.001670131 | -0.480367399 |
| 3519 | PLA2G2D  | 26279 | 1.97E-07    | 0.701877418  |
| 3520 | IL1RAPL2 | 26280 | 1.00E-07    | 0.712976435  |
| 3521 | ERAL1    | 26284 | 0.000800025 | 0.506973533  |
| 3522 | CLDN17   | 26285 | 0.000229937 | 0.546900333  |
| 3523 | ANKRD2   | 26287 | 1.16E-08    | 0.745839345  |
| 3524 | AK5      | 26289 | 2.95E-11    | 0.827733859  |
| 3525 | GALNT8   | 26290 | 4.98E-06    | 0.641639156  |
| 3526 | FGF21    | 26291 | 7.88E-06    | 0.631975253  |
| 3527 | EHF      | 26298 | 0.004121787 | -0.444678932 |
| 3528 | GAPDHS   | 26330 | 8.87E-09    | 0.749576305  |
| 3529 | OR7A17   | 26333 | 0.00588508  | 0.429358357  |
| 3530 | OR5K1    | 26339 | 4.77E-09    | 0.758208093  |
| 3531 | GNL3     | 26354 | 2.64E-06    | -0.654546136 |
| 3532 | C3orf28  | 26355 | 0.001930745 | -0.474845446 |
| 3533 | PPP1R14B | 26472 | 0.001785711 | -0.477801731 |
| 3534 | OR8G2    | 26492 | 8.00E-10    | 0.782190193  |
| 3535 | OR8B8    | 26493 | 1.30E-05    | 0.620785599  |
| 3536 | OR8G1    | 26494 | 2.21E-06    | 0.658066675  |
| 3537 | OR10A3   | 26496 | 5.16E-08    | 0.72341769   |
| 3538 | PLEK2    | 26499 | 9.54E-11    | 0.81040364   |
| 3539 | NARF     | 26502 | 0.005497003 | -0.432338823 |
| 3540 | SLC17A5  | 26503 | 2.12E-07    | 0.700604917  |
| 3541 | CNNM4    | 26504 | 0.001083311 | -0.496139666 |
| 3542 | CNNM3    | 26505 | 6.11E-06    | -0.637380415 |
| 3543 | HEYL     | 26508 | 1.22E-10    | 0.807024085  |
| 3544 | INTS6    | 26512 | 0.003330843 | -0.453533762 |
| 3545 | FXC1     | 26515 | 0.001405002 | -0.486809418 |
| 3546 | TIMM8B   | 26521 | 0.000674267 | -0.512810265 |
| 3547 | DAZAP1   | 26528 | 2.54E-05    | -0.605197731 |
| 3548 | OR11A1   | 26531 | 0.000288595 | 0.540095797  |
| 3549 | OR10H3   | 26532 | 3.59E-06    | 0.648363925  |

|      |          |       |             |              |
|------|----------|-------|-------------|--------------|
| 3550 | OR10H1   | 26539 | 0.003887211 | 0.447112779  |
| 3551 | OR10D1P  | 26541 | 2.82E-11    | 0.828791999  |
| 3552 | ITGB1BP2 | 26548 | 6.37E-09    | 0.754228243  |
| 3553 | AATF     | 26574 | 0.003827729 | -0.447782303 |
| 3554 | RGS17    | 26575 | 2.29E-07    | 0.699308749  |
| 3555 | SRPK3    | 26576 | 0.007293908 | 0.41981368   |
| 3556 | BSCL2    | 26580 | 0.000111245 | -0.56752532  |
| 3557 | TBL2     | 26608 | 0.000416979 | -0.528597036 |
| 3558 | ELP4     | 26610 | 0.002388855 | 0.466872566  |
| 3559 | OR7E19P  | 26651 | 2.04E-07    | 0.701278723  |
| 3560 | OR7A5    | 26659 | 3.71E-11    | 0.824933407  |
| 3561 | OR7C1    | 26664 | 0.002012656 | 0.473293594  |
| 3562 | OR4D1    | 26689 | 0.004379424 | 0.442071596  |
| 3563 | OR2H1    | 26716 | 1.56E-06    | 0.664884888  |
| 3564 | OR1J2    | 26740 | 2.55E-05    | 0.605049973  |
| 3565 | NUFIP1   | 26747 | 0.00103066  | -0.497966203 |
| 3566 | SH3YL1   | 26751 | 0.000147281 | -0.55971673  |
| 3567 | HAVCR1   | 26762 | 1.66E-06    | 0.663568936  |
| 3568 | SNORA72  | 26775 | 0.000378165 | 0.53167309   |
| 3569 | SNORA71A | 26777 | 2.27E-08    | 0.736073634  |
| 3570 | SNORA65  | 26783 | 6.58E-10    | 0.784727688  |
| 3571 | SMR3A    | 26952 | 9.61E-07    | 0.673877047  |
| 3572 | HBP1     | 26959 | 0.000422265 | -0.528212231 |
| 3573 | PABPC1   | 26986 | 9.05E-06    | -0.628858621 |
| 3574 | TRUB2    | 26995 | 0.004168718 | -0.444231194 |
| 3575 | FETUB    | 26998 | 1.57E-06    | 0.664728558  |
| 3576 | TCL6     | 27004 | 0.001568059 | 0.482689984  |
| 3577 | USP21    | 27005 | 0.003264084 | -0.454388465 |
| 3578 | FGF22    | 27006 | 1.30E-11    | 0.843500682  |
| 3579 | KCNV1    | 27012 | 2.65E-05    | 0.604161211  |
| 3580 | C2orf24  | 27013 | 0.000858586 | -0.504496817 |
| 3581 | NGFRAP1  | 27018 | 0.005819636 | -0.429886707 |
| 3582 | NPTN     | 27020 | 0.001104316 | -0.495494914 |
| 3583 | FOXD3    | 27022 | 1.28E-06    | 0.668539713  |
| 3584 | ACAD8    | 27034 | 0.005920336 | -0.429103189 |
| 3585 | PKD2L2   | 27039 | 5.56E-08    | 0.722267098  |
| 3586 | SND1     | 27044 | 4.64E-06    | -0.643129538 |
| 3587 | STAU2    | 27067 | 0.000875346 | 0.503806776  |
| 3588 | PPA2     | 27068 | 0.000522378 | -0.521369114 |
| 3589 | LAMP3    | 27074 | 1.30E-11    | 0.844987471  |
| 3590 | LYPD3    | 27076 | 1.57E-10    | 0.803809376  |
| 3591 | RPUSD2   | 27079 | 0.009212434 | 0.408722465  |
| 3592 | MTBP     | 27085 | 0.000618182 | 0.515780804  |
| 3593 | UQCRQ    | 27089 | 8.02E-05    | -0.576291657 |
| 3594 | CACNG5   | 27091 | 0.000131841 | 0.56274264   |



|      |          |       |             |              |
|------|----------|-------|-------------|--------------|
| 3595 | CACNG4   | 27092 | 0.000386094 | 0.531031474  |
| 3596 | TAF5L    | 27097 | 0.008826264 | -0.410822478 |
| 3597 | EIF2AK1  | 27102 | 5.56E-06    | -0.639354809 |
| 3598 | SDCBP2   | 27111 | 5.81E-05    | 0.584612218  |
| 3599 | DKKL1    | 27120 | 0.003356914 | 0.453219151  |
| 3600 | AFF4     | 27125 | 0.000978293 | -0.499815947 |
| 3601 | HSPB7    | 27129 | 5.98E-08    | 0.721097471  |
| 3602 | KCNH5    | 27133 | 0.000780583 | 0.507787597  |
| 3603 | FILIP1   | 27145 | 0.001376506 | 0.487576932  |
| 3604 | Unknown  | 27146 | 6.12E-11    | 0.816684049  |
| 3605 | DENND2A  | 27147 | 8.84E-09    | 0.749628124  |
| 3606 | STK36    | 27148 | 6.44E-05    | 0.581997673  |
| 3607 | ZNF777   | 27153 | 0.000714458 | -0.510824358 |
| 3608 | BRPF3    | 27154 | 4.76E-10    | 0.788843102  |
| 3609 | ASAH1    | 27163 | 0.00124912  | 0.49111052   |
| 3610 | SALL3    | 27164 | 1.96E-08    | 0.738284406  |
| 3611 | GLS2     | 27165 | 6.58E-07    | 0.680867087  |
| 3612 | PRELID1  | 27166 | 0.007327298 | -0.41961164  |
| 3613 | TUBG2    | 27175 | 0.001760271 | 0.478353892  |
| 3614 | IL1F8    | 27177 | 0.000551585 | 0.519593925  |
| 3615 | SIGLEC9  | 27180 | 0.001036401 | 0.497751689  |
| 3616 | DISC1    | 27185 | 8.41E-08    | 0.715731747  |
| 3617 | IL17B    | 27190 | 3.25E-05    | 0.599213246  |
| 3618 | OXGR1    | 27199 | 0.004710959 | 0.439027857  |
| 3619 | GPR78    | 27201 | 0.000152682 | 0.558699749  |
| 3620 | SERP1    | 27230 | 0.000137052 | -0.561703602 |
| 3621 | SULT1C4  | 27233 | 0.000359096 | 0.533317189  |
| 3622 | ARFIP1   | 27236 | 0.001279369 | -0.49024559  |
| 3623 | ARHGEF16 | 27237 | 7.75E-09    | 0.751492293  |
| 3624 | GPKOW    | 27238 | 0.000658277 | -0.513618242 |
| 3625 | GPR162   | 27239 | 0.000279896 | 0.541040141  |
| 3626 | BBS9     | 27241 | 0.008701962 | -0.411445127 |
| 3627 | AHDC1    | 27245 | 0.001684745 | 0.480043236  |
| 3628 | ZNF364   | 27246 | 0.002852372 | -0.45978914  |
| 3629 | NFU1     | 27247 | 0.000727181 | -0.510208648 |
| 3630 | C2orf30  | 27248 | 4.82E-08    | 0.724495042  |
| 3631 | C2orf25  | 27249 | 0.001043486 | -0.497487377 |
| 3632 | Unknown  | 27251 | 1.98E-05    | 0.611192504  |
| 3633 | SULT1B1  | 27284 | 1.94E-06    | 0.660656712  |
| 3634 | RBMXL2   | 27288 | 1.13E-11    | 0.852113186  |
| 3635 | RND1     | 27289 | 7.05E-07    | 0.679551196  |
| 3636 | SMPDL3B  | 27293 | 2.91E-07    | 0.69523482   |
| 3637 | C20orf10 | 27296 | 2.45E-08    | 0.734861646  |
| 3638 | ADAMDEC1 | 27299 | 2.13E-09    | 0.768976576  |
| 3639 | BMP10    | 27302 | 2.16E-05    | 0.609104517  |

|      |           |       |             |              |
|------|-----------|-------|-------------|--------------|
| 3640 | MOCS3     | 27304 | 1.53E-10    | 0.804261418  |
| 3641 | PGDS      | 27306 | 1.07E-06    | 0.671926194  |
| 3642 | RAB30     | 27314 | 1.04E-06    | 0.672440789  |
| 3643 | PCDH11X   | 27328 | 0.000471398 | 0.524720355  |
| 3644 | P2RY10    | 27334 | 0.006846769 | 0.422724779  |
| 3645 | EIF3K     | 27335 | 0.000153707 | -0.558493917 |
| 3646 | UTP20     | 27340 | 6.29E-11    | 0.816240399  |
| 3647 | KCNMB4    | 27345 | 0.000415394 | 0.52872647   |
| 3648 | TMEM97    | 27346 | 0.008636948 | -0.411807985 |
| 3649 | D15Wsu75e | 27351 | 0.001591642 | 0.482161574  |
| 3650 | HTRA2     | 27429 | 0.00826711  | 0.413930913  |
| 3651 | TOR2A     | 27433 | 0.000731903 | -0.510007339 |
| 3652 | POLM      | 27434 | 0.004866884 | -0.43766126  |
| 3653 | EML4      | 27436 | 0.001756258 | -0.478438637 |
| 3654 | CECR5     | 27440 | 0.000125689 | -0.564064378 |
| 3655 | CECR2     | 27443 | 7.86E-09    | 0.751280926  |
| 3656 | IGHV7-81  | 28378 | 3.50E-05    | 0.597433597  |
| 3657 | IGHV1-69  | 28461 | 0.001571543 | 0.482613677  |
| 3658 | NKIRAS2   | 28511 | 1.22E-06    | 0.6694864    |
| 3659 | CDH19     | 28513 | 6.04E-09    | 0.754943933  |
| 3660 | Unknown   | 28562 | 0.000232011 | 0.546634895  |
| 3661 | Unknown   | 28595 | 0.001094777 | 0.495783392  |
| 3662 | Unknown   | 28683 | 0.005356296 | 0.433470471  |
| 3663 | Unknown   | 28797 | 0.001860163 | 0.476262125  |
| 3664 | Unknown   | 28826 | 4.81E-10    | 0.788678939  |
| 3665 | CCDC22    | 28952 | 6.23E-05    | -0.582811723 |
| 3666 | MAPBPIP   | 28956 | 0.006182167 | -0.427210025 |
| 3667 | MRPS28    | 28957 | 0.006856946 | -0.422652404 |
| 3668 | CCDC56    | 28958 | 0.00495392  | -0.436849542 |
| 3669 | BZW2      | 28969 | 0.006477966 | -0.425213107 |
| 3670 | C11orf54  | 28970 | 0.001249463 | -0.491090709 |
| 3671 | C11orf67  | 28971 | 0.007204611 | -0.420428194 |
| 3672 | SPCS1     | 28972 | 0.003150704 | -0.45583464  |
| 3673 | MRPS18B   | 28973 | 0.005025329 | -0.436267027 |
| 3674 | C19orf53  | 28974 | 0.004188587 | -0.44402896  |
| 3675 | ACAD9     | 28976 | 0.00449947  | -0.440953037 |
| 3676 | FLVCR1    | 28982 | 0.003531793 | -0.451153694 |
| 3677 | MCTS1     | 28985 | 0.008421989 | -0.413006469 |
| 3678 | DBNL      | 28988 | 0.001763033 | -0.478294464 |
| 3679 | COMMD5    | 28991 | 0.005006459 | -0.436426078 |
| 3680 | MACROD1   | 28992 | 0.000208321 | -0.549794944 |
| 3681 | KLF15     | 28999 | 1.30E-11    | 0.845482002  |
| 3682 | PRO1768   | 29018 | 5.46E-05    | 0.586289452  |
| 3683 | C20orf30  | 29058 | 0.000708672 | -0.51113792  |
| 3684 | ZC3H7A    | 29066 | 0.000948439 | -0.500900396 |

|      |              |       |             |              |
|------|--------------|-------|-------------|--------------|
| 3685 | SETD2        | 29072 | 3.76E-06    | -0.647471383 |
| 3686 | MED4         | 29079 | 0.004429567 | -0.44158761  |
| 3687 | PHPT1        | 29085 | 0.001750895 | -0.47855947  |
| 3688 | THYN1        | 29087 | 0.005817298 | -0.429912196 |
| 3689 | HSPC157      | 29092 | 0.002776957 | 0.460795408  |
| 3690 | MRPL22       | 29093 | 0.002603325 | -0.463447378 |
| 3691 | CNIH4        | 29097 | 0.001381103 | -0.487460981 |
| 3692 | COMMD9       | 29099 | 0.000638537 | 0.514652068  |
| 3693 | SSU72        | 29101 | 0.001292079 | -0.489917254 |
| 3694 | RNASEN       | 29102 | 5.26E-05    | -0.587213781 |
| 3695 | N6AMT1       | 29104 | 2.78E-10    | 0.795862294  |
| 3696 | C16orf80     | 29105 | 0.003625401 | -0.450052569 |
| 3697 | NXT1         | 29107 | 0.005669042 | -0.43104351  |
| 3698 | TAGLN3       | 29114 | 3.15E-07    | 0.693852927  |
| 3699 | SAP30BP      | 29115 | 0.004245592 | -0.443459135 |
| 3700 | DDX25        | 29118 | 1.13E-09    | 0.777489665  |
| 3701 | CTNNA3       | 29119 | 0.000125073 | 0.564210903  |
| 3702 | ANKRD11      | 29123 | 0.00165015  | -0.480831139 |
| 3703 | LGALS13      | 29124 | 3.80E-06    | 0.647258653  |
| 3704 | C11orf21     | 29125 | 2.05E-09    | 0.769522589  |
| 3705 | CD274        | 29126 | 2.33E-05    | 0.607291971  |
| 3706 | USP25        | 29761 | 9.53E-05    | 0.571732566  |
| 3707 | DKFZP434P211 | 29774 | 5.08E-10    | 0.788000361  |
| 3708 | PARVB        | 29780 | 1.49E-05    | 0.61764201   |
| 3709 | OLA1         | 29789 | 0.002375859 | -0.467120622 |
| 3710 | UCRC         | 29796 | 4.60E-05    | -0.590555696 |
| 3711 | DKFZp434K191 | 29797 | 3.06E-06    | 0.651587944  |
| 3712 | YPEL1        | 29799 | 2.91E-06    | 0.652629897  |
| 3713 | ZDHHC8       | 29801 | 0.003109391 | -0.456392003 |
| 3714 | REPIN1       | 29803 | 8.73E-05    | -0.574067733 |
| 3715 | ICOS         | 29851 | 8.18E-06    | 0.631108959  |
| 3716 | ALG5         | 29880 | 0.000650724 | -0.514046473 |
| 3717 | ANAPC2       | 29882 | 0.004674282 | -0.439386018 |
| 3718 | STRN4        | 29888 | 0.004100676 | -0.444883789 |
| 3719 | GNL2         | 29889 | 0.001970737 | -0.47409844  |
| 3720 | SAC3D1       | 29901 | 1.05E-07    | 0.712123949  |
| 3721 | EEF2K        | 29904 | 0.005772776 | -0.430263609 |
| 3722 | ST8SIA5      | 29906 | 4.56E-10    | 0.789340753  |
| 3723 | UBIAD1       | 29914 | 0.001787733 | -0.477748574 |
| 3724 | SNX11        | 29916 | 1.28E-06    | 0.668548976  |
| 3725 | GMPPA        | 29926 | 0.001568059 | -0.48269195  |
| 3726 | SEC61A1      | 29927 | 7.76E-05    | -0.577193109 |
| 3727 | TIMM22       | 29928 | 7.04E-09    | 0.752867354  |
| 3728 | PCDHB1       | 29930 | 5.01E-11    | 0.820519955  |
| 3729 | LOH3CR2A     | 29931 | 4.89E-09    | 0.75786719   |

|      |         |       |             |              |
|------|---------|-------|-------------|--------------|
| 3730 | NENF    | 29937 | 4.85E-06    | 0.642195827  |
| 3731 | SERTAD3 | 29946 | 7.14E-07    | 0.679310525  |
| 3732 | DNMT3L  | 29947 | 0.004941995 | 0.436983371  |
| 3733 | FTSJ2   | 29960 | 0.003262165 | -0.454415151 |
| 3734 | A1CF    | 29974 | 1.53E-06    | 0.665256347  |
| 3735 | UBQLN2  | 29978 | 8.68E-05    | -0.57423186  |
| 3736 | UBQLN1  | 29979 | 0.00064172  | -0.514496575 |
| 3737 | SLC39A2 | 29986 | 1.79E-08    | 0.739619492  |
| 3738 | SLC2A8  | 29988 | 0.007843156 | -0.416431725 |
| 3739 | OBP2A   | 29991 | 3.52E-05    | 0.597271154  |
| 3740 | BAZ2B   | 29994 | 0.00273399  | -0.461434414 |
| 3741 | GLTSCR2 | 29997 | 0.000398404 | -0.530059753 |
| 3742 | FSCN3   | 29999 | 4.67E-06    | 0.642996653  |
| 3743 | TBX21   | 30009 | 1.04E-09    | 0.778664043  |
| 3744 | TLX3    | 30012 | 6.35E-11    | 0.816097179  |
| 3745 | RAX     | 30062 | 2.64E-10    | 0.796619161  |
| 3746 | SOX8    | 30812 | 6.65E-11    | 0.815150205  |
| 3747 | KCNIP2  | 30819 | 2.09E-09    | 0.769235387  |
| 3748 | KCNIP1  | 30820 | 7.81E-08    | 0.716895315  |
| 3749 | CXXC1   | 30827 | 3.98E-09    | 0.760750318  |
| 3750 | ZNF354C | 30832 | 3.10E-06    | 0.651335369  |
| 3751 | NT5C    | 30833 | 0.005792806 | -0.430090863 |
| 3752 | ZNRD1   | 30834 | 0.002565595 | -0.464029754 |
| 3753 | CD209   | 30835 | 4.17E-11    | 0.822570624  |
| 3754 | DNTTIP2 | 30836 | 2.04E-09    | 0.769605605  |
| 3755 | EHD2    | 30846 | 3.78E-08    | 0.728136446  |
| 3756 | TAX1BP3 | 30851 | 5.09E-05    | -0.588025755 |
| 3757 | KLK14   | 43847 | 4.29E-10    | 0.790166213  |
| 3758 | KLK12   | 43849 | 4.57E-05    | 0.590758925  |
| 3759 | SCAPER  | 49855 | 0.000199611 | 0.551015852  |
| 3760 | WDR8    | 49856 | 0.008392045 | -0.413187623 |
| 3761 | CLDN20  | 49861 | 1.06E-08    | 0.747077513  |
| 3762 | MINK1   | 50488 | 0.006756881 | 0.423317822  |
| 3763 | DUOX2   | 50506 | 1.24E-07    | 0.709609212  |
| 3764 | NOX3    | 50508 | 0.004807943 | 0.438174121  |
| 3765 | PODXL2  | 50512 | 0.005130813 | -0.435367057 |
| 3766 | 1-Dec   | 50514 | 0.006283344 | 0.42651911   |
| 3767 | CHST11  | 50515 | 3.66E-10    | 0.79238262   |
| 3768 | IL20    | 50604 | 2.35E-08    | 0.735491517  |
| 3769 | IL22    | 50616 | 7.69E-05    | 0.57742363   |
| 3770 | ITSN2   | 50618 | 0.000347107 | -0.534411195 |
| 3771 | CUZD1   | 50624 | 6.81E-06    | 0.63510341   |
| 3772 | CYHR1   | 50626 | 0.001028993 | -0.498026849 |
| 3773 | TMEM16G | 50636 | 0.00019475  | 0.551731357  |
| 3774 | ARHGEF3 | 50650 | 0.004420408 | -0.441688764 |

|      |          |       |             |              |
|------|----------|-------|-------------|--------------|
| 3775 | RDH8     | 50700 | 0.001165213 | 0.493584363  |
| 3776 | IRX4     | 50805 | 3.39E-13    | 0.884829446  |
| 3777 | AK3      | 50808 | 9.00E-05    | -0.573295834 |
| 3778 | COPS7A   | 50813 | 0.000369118 | -0.532414375 |
| 3779 | TAS2R4   | 50832 | 8.35E-08    | 0.715869284  |
| 3780 | TAS2R7   | 50837 | 0.000716316 | 0.510730916  |
| 3781 | TAS2R13  | 50838 | 7.74E-06    | 0.632351322  |
| 3782 | DHH      | 50846 | 3.14E-11    | 0.826884877  |
| 3783 | F11R     | 50848 | 5.77E-05    | -0.584820073 |
| 3784 | TRAT1    | 50852 | 4.23E-05    | 0.592702825  |
| 3785 | VILL     | 50853 | 0.001260308 | -0.490799543 |
| 3786 | HNT      | 50863 | 0.000264963 | 0.542648644  |
| 3787 | HEBP1    | 50865 | 0.000518216 | -0.521639516 |
| 3788 | SLC35B3  | 51000 | 0.001169136 | -0.493463766 |
| 3789 | TPRKB    | 51002 | 0.000100487 | -0.57032344  |
| 3790 | MED31    | 51003 | 0.009042995 | -0.409629811 |
| 3791 | COQ6     | 51004 | 0.001468721 | -0.485163742 |
| 3792 | AMDHD2   | 51005 | 0.000121352 | -0.565056788 |
| 3793 | SLC35C2  | 51006 | 0.000502255 | -0.522652057 |
| 3794 | ASCC1    | 51008 | 0.001041277 | 0.497568964  |
| 3795 | FAHD2A   | 51011 | 4.50E-06    | -0.643762739 |
| 3796 | EXOSC1   | 51013 | 0.000104831 | -0.569175785 |
| 3797 | TMED7    | 51014 | 0.007453309 | -0.418802906 |
| 3798 | ISOC1    | 51015 | 0.001004462 | 0.498890776  |
| 3799 | MRPS16   | 51021 | 0.001251359 | -0.49103235  |
| 3800 | FIS1     | 51024 | 6.08E-05    | -0.583448669 |
| 3801 | Magmas   | 51025 | 0.008850185 | -0.410664075 |
| 3802 | FAM18B   | 51030 | 0.000159628 | -0.557428432 |
| 3803 | LOC51035 | 51035 | 0.000619357 | -0.51570844  |
| 3804 | ZNF593   | 51042 | 0.000246166 | -0.544903593 |
| 3805 | ST8SIA3  | 51046 | 8.69E-05    | 0.574200579  |
| 3806 | PI15     | 51050 | 4.55E-05    | 0.590865494  |
| 3807 | PRLH     | 51052 | 0.009093825 | 0.409322811  |
| 3808 | FAM135B  | 51059 | 1.90E-10    | 0.801100153  |
| 3809 | TXNDC11  | 51061 | 0.001025339 | 0.498146413  |
| 3810 | FAM26B   | 51063 | 2.29E-10    | 0.798523927  |
| 3811 | C3orf32  | 51066 | 1.46E-09    | 0.774024602  |
| 3812 | YARS2    | 51067 | 0.008378473 | -0.413271797 |
| 3813 | NOSIP    | 51070 | 0.008028238 | -0.415351738 |
| 3814 | TXNDC14  | 51075 | 0.000359208 | -0.533296586 |
| 3815 | CUTC     | 51076 | 0.0001305   | -0.563021286 |
| 3816 | NDUFA13  | 51079 | 1.03E-05    | -0.626051714 |
| 3817 | POLR1D   | 51082 | 0.002093429 | -0.471840925 |
| 3818 | MLXIPL   | 51085 | 1.66E-10    | 0.802958923  |
| 3819 | SIDT2    | 51092 | 0.003877611 | -0.447211217 |

|      |           |       |             |              |
|------|-----------|-------|-------------|--------------|
| 3820 | ADIPOR1   | 51094 | 0.003560108 | 0.450824067  |
| 3821 | IFT52     | 51098 | 2.71E-06    | 0.654110985  |
| 3822 | ABHD5     | 51099 | 0.000659574 | 0.513531822  |
| 3823 | NDUFAF1   | 51103 | 0.004869087 | -0.4376289   |
| 3824 | PHF20L1   | 51105 | 0.001120558 | 0.494979017  |
| 3825 | TFB1M     | 51106 | 6.66E-11    | 0.815106892  |
| 3826 | METTL9    | 51108 | 0.001481368 | -0.484814259 |
| 3827 | RDH11     | 51109 | 0.009692888 | -0.406318832 |
| 3828 | TTC15     | 51112 | 0.001847741 | -0.476507383 |
| 3829 | FAM82B    | 51115 | 0.008127391 | -0.414732966 |
| 3830 | COQ4      | 51117 | 0.006339976 | -0.426127756 |
| 3831 | RPL26L1   | 51121 | 0.000550874 | -0.51963658  |
| 3832 | ZNF706    | 51123 | 0.000229882 | -0.546918598 |
| 3833 | SAR1B     | 51128 | 0.006728238 | -0.423505856 |
| 3834 | ASB3      | 51130 | 0.000197131 | 0.551375125  |
| 3835 | PHF11     | 51131 | 0.000348295 | 0.534291181  |
| 3836 | LOC51136  | 51136 | 0.006616432 | 0.424269001  |
| 3837 | LOC51145  | 51145 | 0.000877323 | 0.503722094  |
| 3838 | A4GNT     | 51146 | 0.00253694  | 0.464476882  |
| 3839 | ING4      | 51147 | 8.80E-06    | 0.629530793  |
| 3840 | CERCAM    | 51148 | 0.000383479 | 0.531248195  |
| 3841 | LOC51149  | 51149 | 0.008443816 | -0.41287383  |
| 3842 | LOC51152  | 51152 | 3.07E-07    | 0.694295224  |
| 3843 | MRTO4     | 51154 | 0.005989168 | -0.428580742 |
| 3844 | SERPINA10 | 51156 | 4.37E-07    | 0.688169851  |
| 3845 | ZNF580    | 51157 | 1.88E-09    | 0.770722706  |
| 3846 | VPS28     | 51160 | 0.000656122 | -0.513742589 |
| 3847 | DBR1      | 51163 | 0.000930039 | 0.501622034  |
| 3848 | DCTN4     | 51164 | 0.000571202 | -0.518413813 |
| 3849 | CYB5R4    | 51167 | 5.28E-09    | 0.756806195  |
| 3850 | MYO15A    | 51168 | 0.001383163 | 0.487402934  |
| 3851 | TUBD1     | 51174 | 0.004217852 | -0.443733156 |
| 3852 | LEF1      | 51176 | 0.006789757 | -0.423096175 |
| 3853 | HAO2      | 51179 | 1.46E-05    | 0.618225282  |
| 3854 | CRBN      | 51185 | 0.000711138 | -0.510992363 |
| 3855 | SS18L2    | 51188 | 0.002685526 | -0.462194434 |
| 3856 | C9orf53   | 51198 | 8.77E-10    | 0.781106072  |
| 3857 | CLDN18    | 51208 | 3.91E-07    | 0.690146558  |
| 3858 | LUZP4     | 51213 | 9.17E-10    | 0.780443537  |
| 3859 | C14orf91  | 51217 | 5.88E-05    | 0.584284728  |
| 3860 | TCEB3B    | 51224 | 0.000755715 | 0.508962395  |
| 3861 | COPZ2     | 51226 | 3.95E-08    | 0.727527122  |
| 3862 | TMEM85    | 51234 | 0.00214038  | -0.471007253 |
| 3863 | C8orf30A  | 51236 | 2.11E-07    | 0.700733767  |
| 3864 | C3orf19   | 51244 | 8.33E-05    | -0.575293737 |

|      |           |       |             |              |
|------|-----------|-------|-------------|--------------|
| 3865 | PAIP2     | 51247 | 0.000634985 | -0.514836688 |
| 3866 | PDZD11    | 51248 | 0.007488109 | -0.418573585 |
| 3867 | C6orf203  | 51250 | 0.003217301 | -0.45495946  |
| 3868 | NT5C3     | 51251 | 0.00694703  | -0.42205427  |
| 3869 | MRPL51    | 51258 | 0.008673264 | -0.411601278 |
| 3870 | CXorf26   | 51260 | 6.65E-05    | -0.581117515 |
| 3871 | MRPL27    | 51264 | 0.000557804 | -0.519209413 |
| 3872 | CDKL3     | 51265 | 5.26E-07    | 0.684925412  |
| 3873 | CLEC1B    | 51266 | 3.25E-05    | 0.599269445  |
| 3874 | CLEC1A    | 51267 | 1.09E-08    | 0.746678766  |
| 3875 | TFDP3     | 51270 | 1.60E-11    | 0.83840234   |
| 3876 | BET1L     | 51272 | 0.002257504 | -0.468955126 |
| 3877 | KLF3      | 51274 | 0.001108111 | -0.495384065 |
| 3878 | SCAND1    | 51282 | 0.003428155 | -0.452351993 |
| 3879 | RASL12    | 51285 | 4.57E-10    | 0.789315998  |
| 3880 | CHCHD8    | 51287 | 0.000767714 | -0.508399783 |
| 3881 | RXFP3     | 51289 | 1.20E-09    | 0.776709489  |
| 3882 | CD320     | 51293 | 0.0066939   | -0.423726894 |
| 3883 | PCDH12    | 51294 | 6.59E-07    | 0.680846179  |
| 3884 | ECSIT     | 51295 | 0.008416196 | -0.413054061 |
| 3885 | PLUNC     | 51297 | 5.05E-10    | 0.788083654  |
| 3886 | THEG      | 51298 | 0.000475095 | 0.524471569  |
| 3887 | NRN1      | 51299 | 0.007268796 | 0.419967333  |
| 3888 | C3orf1    | 51300 | 0.000390625 | -0.530680764 |
| 3889 | GCNT4     | 51301 | 1.74E-08    | 0.740095831  |
| 3890 | KCNK9     | 51305 | 4.95E-09    | 0.75768061   |
| 3891 | C5orf5    | 51306 | 0.002615013 | -0.463274184 |
| 3892 | FAM53C    | 51307 | 6.55E-05    | -0.581549632 |
| 3893 | TLR8      | 51311 | 0.000107078 | 0.568596216  |
| 3894 | Unknown   | 51314 | 0.000160644 | 0.557230604  |
| 3895 | PHF21A    | 51317 | 0.000290104 | -0.539937996 |
| 3896 | MRPL35    | 51318 | 1.81E-05    | 0.613238202  |
| 3897 | AMZ2      | 51321 | 0.000308934 | -0.538027738 |
| 3898 | WAC       | 51322 | 4.23E-07    | -0.688715551 |
| 3899 | SPG21     | 51324 | 0.00095689  | -0.500575691 |
| 3900 | ARL17P1   | 51326 | 0.008889992 | -0.4104555   |
| 3901 | ERAF      | 51327 | 2.43E-08    | 0.734964609  |
| 3902 | ARL6IP4   | 51329 | 0.002479434 | -0.46540097  |
| 3903 | TNFRSF12A | 51330 | 8.98E-08    | 0.714667147  |
| 3904 | SPTBN5    | 51332 | 3.28E-05    | 0.598975306  |
| 3905 | MS4A4A    | 51338 | 0.00049655  | 0.523015608  |
| 3906 | FZR1      | 51343 | 2.07E-07    | 0.701092651  |
| 3907 | TAOK3     | 51347 | 1.72E-08    | 0.740266602  |
| 3908 | MBTPS2    | 51360 | 0.00010801  | -0.568359845 |
| 3909 | HOOK1     | 51361 | 0.008343445 | -0.4135135   |

|      |           |       |             |              |
|------|-----------|-------|-------------|--------------|
| 3910 | CDC40     | 51362 | 0.003832889 | -0.447707913 |
| 3911 | UBR5      | 51366 | 0.00566756  | -0.431058491 |
| 3912 | POP5      | 51367 | 0.000638052 | -0.514679868 |
| 3913 | TEX264    | 51368 | 0.003647423 | -0.449791227 |
| 3914 | POMP      | 51371 | 0.000103987 | -0.569410485 |
| 3915 | CCDC72    | 51372 | 4.38E-06    | -0.644296532 |
| 3916 | C2orf28   | 51374 | 0.000866943 | -0.504152487 |
| 3917 | CRLF3     | 51379 | 0.003560108 | -0.450819884 |
| 3918 | WNT16     | 51384 | 0.000936858 | 0.501336265  |
| 3919 | EIF3EIP   | 51386 | 7.93E-05    | -0.576627804 |
| 3920 | RWDD1     | 51389 | 0.009742754 | -0.406064962 |
| 3921 | AIG1      | 51390 | 0.004282714 | -0.443048399 |
| 3922 | C19orf56  | 51398 | 0.000232027 | -0.546626862 |
| 3923 | TRAPPC4   | 51399 | 0.005868932 | -0.429484866 |
| 3924 | BIN2      | 51411 | 0.000670176 | 0.51299878   |
| 3925 | AMOTL2    | 51421 | 0.006674161 | -0.423859731 |
| 3926 | DDX41     | 51428 | 0.000719812 | -0.510576811 |
| 3927 | C1orf9    | 51430 | 0.007250727 | -0.420120274 |
| 3928 | ANAPC5    | 51433 | 0.000117649 | -0.565938951 |
| 3929 | MAGEC2    | 51438 | 1.06E-08    | 0.747074935  |
| 3930 | FAM8A1    | 51439 | 0.009215708 | -0.4087032   |
| 3931 | YTHDF2    | 51441 | 6.06E-06    | -0.637568699 |
| 3932 | IHPK2     | 51447 | 9.68E-06    | -0.627375511 |
| 3933 | LCMT1     | 51451 | 0.000400102 | -0.529924495 |
| 3934 | REV1      | 51455 | 0.005061888 | -0.435953591 |
| 3935 | ISYNA1    | 51477 | 0.000297697 | -0.539155704 |
| 3936 | HSD17B7   | 51478 | 0.008477357 | -0.412692102 |
| 3937 | ANKFY1    | 51479 | 0.004022289 | -0.445705741 |
| 3938 | C9orf114  | 51490 | 0.009206028 | -0.408760571 |
| 3939 | HSPC111   | 51491 | 1.92E-05    | 0.611841794  |
| 3940 | CWC15     | 51503 | 1.09E-10    | 0.808517901  |
| 3941 | HSPC152   | 51504 | 0.001251073 | -0.491045065 |
| 3942 | UFC1      | 51506 | 0.00011179  | -0.567355193 |
| 3943 | C20orf43  | 51507 | 0.002907773 | -0.459033624 |
| 3944 | NCKIPSD   | 51517 | 3.23E-07    | 0.693400084  |
| 3945 | LARS      | 51520 | 0.000597098 | -0.516978925 |
| 3946 | TMEM14C   | 51522 | 0.001705914 | -0.479580773 |
| 3947 | CXXC5     | 51523 | 0.001829004 | -0.476904343 |
| 3948 | TMEM138   | 51524 | 0.001082882 | -0.496157442 |
| 3949 | C14orf100 | 51528 | 0.007381065 | -0.419236221 |
| 3950 | ANAPC11   | 51529 | 7.23E-05    | -0.579011137 |
| 3951 | PHF7      | 51533 | 9.57E-11    | 0.81035211   |
| 3952 | ZCCHC17   | 51538 | 0.000170345 | -0.555570434 |
| 3953 | VPS54     | 51542 | 0.002385699 | -0.466938132 |
| 3954 | SIRT6     | 51548 | 7.40E-08    | 0.717749123  |



|      |            |       |             |              |
|------|------------|-------|-------------|--------------|
| 3955 | LARP7      | 51574 | 0.000324482 | -0.536559145 |
| 3956 | AZIN1      | 51582 | 0.006562285 | -0.424628304 |
| 3957 | TRIM33     | 51592 | 0.00037513  | -0.531930083 |
| 3958 | ARS2       | 51593 | 0.000136239 | -0.561857949 |
| 3959 | NAG        | 51594 | 0.001014302 | -0.498543584 |
| 3960 | CUTA       | 51596 | 1.87E-05    | -0.612479945 |
| 3961 | LSR        | 51599 | 0.00861617  | -0.411923569 |
| 3962 | LIPT1      | 51601 | 0.003793032 | -0.44819167  |
| 3963 | NOP5/NOP58 | 51602 | 0.004677154 | -0.439358407 |
| 3964 | KIAA0859   | 51603 | 0.002744604 | -0.461291798 |
| 3965 | PIGT       | 51604 | 0.000390437 | 0.530700055  |
| 3966 | ATP6V1H    | 51606 | 0.008626198 | 0.411872526  |
| 3967 | TAF9B      | 51616 | 0.001244343 | -0.491256044 |
| 3968 | HMP19      | 51617 | 5.80E-09    | 0.755524592  |
| 3969 | UBE2D4     | 51619 | 3.58E-10    | 0.792673112  |
| 3970 | KLF13      | 51621 | 0.003703182 | -0.449160174 |
| 3971 | C7orf28A   | 51622 | 1.04E-05    | 0.625820682  |
| 3972 | LUC7L2     | 51631 | 9.63E-05    | -0.571444558 |
| 3973 | RBMX2      | 51634 | 0.009271793 | -0.408415353 |
| 3974 | DHRS7      | 51635 | 0.001397034 | 0.487021989  |
| 3975 | C14orf166  | 51637 | 0.000108368 | -0.56825383  |
| 3976 | SF3B14     | 51639 | 0.008346152 | -0.413480198 |
| 3977 | TMBIM4     | 51643 | 0.000406073 | -0.52944976  |
| 3978 | FAM96B     | 51647 | 0.004355821 | -0.442310503 |
| 3979 | MRPS33     | 51650 | 0.000106112 | -0.568835946 |
| 3980 | PTRH2      | 51651 | 0.000943251 | -0.50107145  |
| 3981 | CDK5RAP1   | 51654 | 0.002696578 | -0.461977671 |
| 3982 | BRP44L     | 51660 | 0.000149108 | -0.559357415 |
| 3983 | ZFR        | 51663 | 0.000254336 | -0.543872982 |
| 3984 | ASB4       | 51666 | 5.88E-11    | 0.817672792  |
| 3985 | NUB1       | 51667 | 0.001725589 | -0.479128484 |
| 3986 | C1orf41    | 51668 | 0.002252398 | -0.46904132  |
| 3987 | TMEM66     | 51669 | 0.007772967 | -0.416838362 |
| 3988 | OAZ3       | 51686 | 1.91E-10    | 0.80101557   |
| 3989 | LSM7       | 51690 | 0.005089832 | -0.435719776 |
| 3990 | CPSF3      | 51692 | 0.004217852 | -0.443747898 |
| 3991 | HECA       | 51696 | 0.00047739  | -0.52432453  |
| 3992 | NLK        | 51701 | 0.002269357 | -0.468764615 |
| 3993 | PADI3      | 51702 | 4.05E-05    | 0.593807677  |
| 3994 | SELT       | 51714 | 0.001005564 | -0.498851827 |
| 3995 | UIMC1      | 51720 | 0.006593101 | -0.424429394 |
| 3996 | FBXO40     | 51725 | 0.000823632 | 0.50590322   |
| 3997 | SEPX1      | 51734 | 0.00013895  | 0.561329361  |
| 3998 | GHRL       | 51738 | 1.06E-05    | 0.625349951  |
| 3999 | WVOX       | 51741 | 2.68E-07    | 0.696601846  |

|      |          |       |             |              |
|------|----------|-------|-------------|--------------|
| 4000 | CD244    | 51744 | 3.24E-09    | 0.763496726  |
| 4001 | Unknown  | 51750 | 2.72E-08    | 0.733215126  |
| 4002 | SKIP     | 51763 | 0.000808775 | 0.506593483  |
| 4003 | GNG13    | 51764 | 0.000105209 | 0.569056597  |
| 4004 | TM7SF3   | 51768 | 0.004768385 | -0.438507514 |
| 4005 | RSF1     | 51773 | 0.001267881 | -0.490558675 |
| 4006 | MYOZ2    | 51778 | 8.97E-10    | 0.780772363  |
| 4007 | COQ3     | 51805 | 0.00336205  | 0.453155117  |
| 4008 | TUBA8    | 51807 | 2.28E-09    | 0.768121234  |
| 4009 | GALNT7   | 51809 | 0.00385744  | -0.447428242 |
| 4010 | BTBD1    | 53339 | 0.002315096 | -0.468029159 |
| 4011 | NUDT9    | 53343 | 0.002082024 | -0.472048291 |
| 4012 | TM6SF2   | 53345 | 0.002533448 | 0.464550526  |
| 4013 | TM6SF1   | 53346 | 0.000153433 | 0.558551194  |
| 4014 | UBASH3A  | 53347 | 2.96E-11    | 0.827615109  |
| 4015 | ZFYVE1   | 53349 | 0.003854951 | -0.447468048 |
| 4016 | NUP54    | 53371 | 0.001669858 | -0.480378187 |
| 4017 | TPCN1    | 53373 | 0.006894973 | -0.422399325 |
| 4018 | BCMO1    | 53630 | 3.01E-10    | 0.794899438  |
| 4019 | PRKAG3   | 53632 | 6.16E-08    | 0.720590818  |
| 4020 | PTOV1    | 53635 | 0.000700932 | -0.511511166 |
| 4021 | FXYD7    | 53822 | 5.48E-10    | 0.787014835  |
| 4022 | FXYD4    | 53828 | 0.000104831 | 0.56918099   |
| 4023 | GPR84    | 53831 | 2.03E-11    | 0.83534175   |
| 4024 | C11orf24 | 53838 | 0.006445275 | -0.425436235 |
| 4025 | MUPCDH   | 53841 | 6.36E-08    | 0.720074784  |
| 4026 | MYO3A    | 53904 | 0.002578854 | 0.463799029  |
| 4027 | DUOX1    | 53905 | 0.003413834 | 0.45253044   |
| 4028 | RAB24    | 53917 | 0.000438373 | -0.527034341 |
| 4029 | SLCO1C1  | 53919 | 2.72E-07    | 0.696353187  |
| 4030 | PPIL3    | 53938 | 0.003150183 | -0.455847998 |
| 4031 | A4GALT   | 53947 | 0.000632477 | 0.514975309  |
| 4032 | CPSF2    | 53981 | 0.000920825 | 0.501990165  |
| 4033 | PCBP3    | 54039 | 2.26E-11    | 0.833503655  |
| 4034 | C21orf58 | 54058 | 2.61E-10    | 0.796766345  |
| 4035 | C21orf49 | 54067 | 1.66E-10    | 0.803066365  |
| 4036 | C21orf45 | 54069 | 0.009296448 | -0.408273699 |
| 4037 | C21orf42 | 54072 | 0.001988474 | 0.473766648  |
| 4038 | C21orf37 | 54076 | 7.01E-09    | 0.752920446  |
| 4039 | C21orf23 | 54088 | 0.000456285 | 0.525751315  |
| 4040 | C21orf22 | 54089 | 0.000868853 | 0.504069481  |
| 4041 | SETD4    | 54093 | 0.002465115 | -0.465644621 |
| 4042 | RIPK4    | 54101 | 0.000691772 | -0.511947329 |
| 4043 | CHRAC1   | 54108 | 0.007687291 | -0.417331089 |
| 4044 | C21orf74 | 54143 | 0.004766497 | 0.438532499  |

|      |          |       |             |              |
|------|----------|-------|-------------|--------------|
| 4045 | MRPL39   | 54148 | 0.007196196 | -0.420483546 |
| 4046 | C21orf91 | 54149 | 0.002186316 | -0.47019869  |
| 4047 | NANS     | 54187 | 0.004348296 | -0.442392911 |
| 4048 | CYCS     | 54205 | 0.008653046 | -0.411703719 |
| 4049 | KCNK10   | 54207 | 3.21E-07    | 0.693502787  |
| 4050 | TREM1    | 54210 | 2.05E-06    | 0.659615859  |
| 4051 | GPR85    | 54329 | 2.26E-10    | 0.798725853  |
| 4052 | DPM3     | 54344 | 0.000114408 | -0.566719018 |
| 4053 | SLC38A2  | 54407 | 0.000230533 | -0.546820398 |
| 4054 | DNAJC10  | 54431 | 0.001495681 | -0.484470526 |
| 4055 | YIPF1    | 54432 | 0.001723536 | 0.479177914  |
| 4056 | NOLA1    | 54433 | 0.002381013 | -0.467026296 |
| 4057 | SEMA5B   | 54437 | 5.63E-05    | 0.585477305  |
| 4058 | CXorf9   | 54440 | 7.52E-05    | 0.577963911  |
| 4059 | RIN2     | 54453 | 0.000742591 | -0.509547062 |
| 4060 | ATAD2B   | 54454 | 0.008789655 | -0.411007532 |
| 4061 | FBXO42   | 54455 | 6.21E-07    | 0.681941065  |
| 4062 | MOV10L1  | 54456 | 2.55E-09    | 0.76659221   |
| 4063 | PRR13    | 54458 | 5.43E-06    | -0.639858755 |
| 4064 | MRPS21   | 54460 | 0.000651488 | -0.514000741 |
| 4065 | FBXW5    | 54461 | 0.000815965 | -0.506238529 |
| 4066 | KIAA1128 | 54462 | 5.89E-10    | 0.786026193  |
| 4067 | XRN1     | 54464 | 0.004226156 | -0.443651558 |
| 4068 | FLJ20323 | 54468 | 0.000128011 | -0.563548824 |
| 4069 | ZFAND6   | 54469 | 0.000102853 | -0.569714773 |
| 4070 | ARMCX6   | 54470 | 0.000131305 | -0.56285006  |
| 4071 | TOLLIP   | 54472 | 0.005820193 | -0.429877896 |
| 4072 | DGCR8    | 54487 | 0.00533582  | -0.433643623 |
| 4073 | C11orf71 | 54494 | 0.000407189 | -0.529359947 |
| 4074 | TXNDC10  | 54495 | 0.002766018 | -0.460965189 |
| 4075 | Unknown  | 54496 | 0.007254575 | -0.420073895 |
| 4076 | HEATR5B  | 54497 | 2.39E-05    | -0.606636209 |
| 4077 | SMOX     | 54498 | 1.81E-07    | 0.703403381  |
| 4078 | ZDHHC13  | 54503 | 3.96E-08    | 0.727486874  |
| 4079 | EXOSC4   | 54512 | 0.001857344 | -0.476322442 |
| 4080 | DDX4     | 54514 | 0.000127284 | 0.563708654  |
| 4081 | APBB1IP  | 54518 | 0.000117148 | 0.566062788  |
| 4082 | ASNSD1   | 54529 | 1.58E-05    | -0.616428943 |
| 4083 | MIER2    | 54531 | 3.73E-11    | 0.824719765  |
| 4084 | CCHCR1   | 54535 | 3.13E-07    | 0.693934221  |
| 4085 | FAM35A   | 54537 | 3.08E-05    | -0.600561274 |
| 4086 | ROBO4    | 54538 | 2.12E-09    | 0.769060163  |
| 4087 | NDUFB11  | 54539 | 0.0001565   | -0.55800274  |
| 4088 | CRCT1    | 54544 | 4.59E-08    | 0.725281905  |
| 4089 | MTMR12   | 54545 | 0.004501556 | -0.440930987 |

|      |          |       |             |              |
|------|----------|-------|-------------|--------------|
| 4090 | SDK2     | 54549 | 1.52E-05    | 0.617270639  |
| 4091 | EFCBP2   | 54550 | 3.14E-05    | 0.600083393  |
| 4092 | WDR5B    | 54554 | 0.007884411 | -0.416191097 |
| 4093 | DDX49    | 54555 | 0.000214836 | -0.548903971 |
| 4094 | SCAND2   | 54581 | 2.23E-11    | 0.8338319    |
| 4095 | EGLN1    | 54583 | 0.00722909  | -0.420266491 |
| 4096 | C9orf11  | 54586 | 0.000300149 | 0.538905444  |
| 4097 | DDX56    | 54606 | 2.28E-08    | 0.735986628  |
| 4098 | PARP14   | 54625 | 0.006148718 | -0.427445794 |
| 4099 | HES2     | 54626 | 6.21E-07    | 0.681944249  |
| 4100 | KIAA1383 | 54627 | 8.16E-05    | 0.57583932   |
| 4101 | TBC1D13  | 54662 | 1.91E-10    | 0.801005903  |
| 4102 | LRRN3    | 54674 | 0.00436261  | 0.442239138  |
| 4103 | CRLS1    | 54675 | 0.000655847 | -0.513772352 |
| 4104 | PH-4     | 54681 | 0.000478345 | -0.524244554 |
| 4105 | CNGB3    | 54714 | 1.67E-05    | 0.615077165  |
| 4106 | A2BP1    | 54715 | 0.000813251 | 0.506372016  |
| 4107 | BTN2A3   | 54718 | 0.008652977 | 0.411709155  |
| 4108 | OTUD4    | 54726 | 1.93E-05    | -0.611707965 |
| 4109 | NKX1-1   | 54729 | 4.98E-07    | 0.685837991  |
| 4110 | TMED9    | 54732 | 0.00015415  | -0.558415202 |
| 4111 | RAB39    | 54734 | 6.96E-05    | 0.579980582  |
| 4112 | MPHOSPH8 | 54737 | 0.004180519 | -0.44410868  |
| 4113 | FEV      | 54738 | 0.001550248 | 0.483131702  |
| 4114 | Unknown  | 54741 | 0.003346659 | -0.453341894 |
| 4115 | FBLIM1   | 54751 | 0.003856108 | 0.447445817  |
| 4116 | FNDC8    | 54752 | 4.28E-09    | 0.759795561  |
| 4117 | FAM22F   | 54754 | 2.32E-05    | 0.607415034  |
| 4118 | PCSK4    | 54760 | 2.66E-11    | 0.82991495   |
| 4119 | ROPN1    | 54763 | 3.28E-05    | 0.598974108  |
| 4120 | ZRANB1   | 54764 | 0.002693327 | -0.462035594 |
| 4121 | TRIM44   | 54765 | 5.78E-06    | -0.638588927 |
| 4122 | BTG4     | 54766 | 4.67E-06    | 0.643003982  |
| 4123 | RNF111   | 54778 | 0.009608067 | -0.40674078  |
| 4124 | ALKBH4   | 54784 | 1.19E-09    | 0.77682064   |
| 4125 | C17orf59 | 54785 | 9.28E-09    | 0.74896243   |
| 4126 | MED18    | 54797 | 0.004253144 | -0.443371014 |
| 4127 | DCHS2    | 54798 | 7.14E-11    | 0.814307173  |
| 4128 | KLHL24   | 54800 | 0.002821951 | -0.46019321  |
| 4129 | TRIT1    | 54802 | 0.000363365 | -0.532891882 |
| 4130 | DYM      | 54808 | 0.001290635 | -0.489957735 |
| 4131 | ZNF562   | 54811 | 0.008051899 | -0.415216114 |
| 4132 | AFTPH    | 54812 | 0.000471106 | 0.524755713  |
| 4133 | KLHL28   | 54813 | 0.000529229 | -0.520905525 |
| 4134 | ERCC6L   | 54821 | 1.84E-09    | 0.77098751   |

|      |             |       |             |              |
|------|-------------|-------|-------------|--------------|
| 4135 | TRPM7       | 54822 | 9.98E-05    | 0.570514071  |
| 4136 | FAM55D      | 54827 | 4.57E-08    | 0.725338808  |
| 4137 | BEST2       | 54831 | 5.03E-11    | 0.820339684  |
| 4138 | VPS13C      | 54832 | 0.004722267 | -0.438914222 |
| 4139 | C10orf26    | 54838 | 5.55E-05    | -0.585902764 |
| 4140 | APTX        | 54840 | 0.001445977 | 0.485752016  |
| 4141 | BIVM        | 54841 | 0.000447142 | -0.526375723 |
| 4142 | RBM35A      | 54845 | 0.000305818 | -0.538318199 |
| 4143 | SIDT1       | 54847 | 7.72E-09    | 0.751562539  |
| 4144 | FLJ20184    | 54848 | 1.32E-05    | 0.620506788  |
| 4145 | DEF8        | 54849 | 0.004313009 | -0.442744473 |
| 4146 | ANKRD49     | 54851 | 2.03E-08    | 0.737756251  |
| 4147 | PAQR5       | 54852 | 5.99E-08    | 0.721044248  |
| 4148 | WDR55       | 54853 | 1.70E-10    | 0.802596496  |
| 4149 | GDPD2       | 54857 | 4.86E-05    | 0.589186706  |
| 4150 | TMEM103     | 54859 | 0.001559717 | 0.482921102  |
| 4151 | MS4A12      | 54860 | 3.91E-05    | 0.594640606  |
| 4152 | SNRK        | 54861 | 0.001193764 | -0.492729648 |
| 4153 | FNBP1L      | 54874 | 0.000685223 | -0.512271178 |
| 4154 | DPP8        | 54878 | 0.006303943 | -0.426374561 |
| 4155 | BCOR        | 54880 | 0.001279369 | -0.490242244 |
| 4156 | CCDC49      | 54883 | 0.009275447 | 0.408394535  |
| 4157 | RP11-35N6.1 | 54886 | 3.39E-10    | 0.793389876  |
| 4158 | ALKBH5      | 54890 | 1.36E-06    | -0.667369252 |
| 4159 | RNF43       | 54894 | 0.005127686 | -0.435405264 |
| 4160 | PQLC2       | 54896 | 2.60E-11    | 0.830658183  |
| 4161 | CASZ1       | 54897 | 0.001328391 | -0.488927886 |
| 4162 | CDKAL1      | 54901 | 3.35E-05    | 0.59850618   |
| 4163 | TTC19       | 54902 | 0.001753882 | -0.478493391 |
| 4164 | C10orf18    | 54906 | 0.003304592 | -0.453873663 |
| 4165 | KIAA1797    | 54914 | 0.007927287 | -0.415943677 |
| 4166 | YTHDF1      | 54915 | 8.11E-05    | -0.576001935 |
| 4167 | C14orf101   | 54916 | 0.001777468 | -0.477978968 |
| 4168 | CMTM6       | 54918 | 0.00391474  | -0.446787592 |
| 4169 | HEATR2      | 54919 | 2.43E-05    | -0.606255296 |
| 4170 | RASIP1      | 54922 | 1.99E-07    | 0.701739059  |
| 4171 | ZNF434      | 54925 | 2.90E-08    | 0.732236013  |
| 4172 | TMEM161A    | 54929 | 0.001718305 | -0.479303482 |
| 4173 | C12orf41    | 54934 | 9.61E-06    | -0.627545191 |
| 4174 | ADPRHL2     | 54936 | 6.70E-05    | -0.580966556 |
| 4175 | SARS2       | 54938 | 2.07E-09    | 0.769387697  |
| 4176 | OCIAD1      | 54940 | 1.00E-05    | -0.626643613 |
| 4177 | MRPL16      | 54948 | 0.000168791 | -0.555846743 |
| 4178 | C1orf27     | 54953 | 0.004450646 | -0.441389727 |
| 4179 | FAM120C     | 54954 | 0.00829655  | -0.41378112  |

|      |           |       |             |              |
|------|-----------|-------|-------------|--------------|
| 4180 | C1orf109  | 54955 | 0.003615833 | -0.450172299 |
| 4181 | TMEM160   | 54958 | 2.04E-07    | 0.701357381  |
| 4182 | GEMIN8    | 54960 | 0.008751038 | -0.41119713  |
| 4183 | SSH3      | 54961 | 0.007536625 | -0.418269262 |
| 4184 | UCKL1     | 54963 | 0.007511447 | -0.418409175 |
| 4185 | CXorf48   | 54967 | 0.000562107 | 0.518954811  |
| 4186 | BANP      | 54971 | 5.03E-05    | -0.588354628 |
| 4187 | CPSF3L    | 54973 | 0.000111887 | -0.567321357 |
| 4188 | SLC25A38  | 54977 | 0.003176633 | -0.455475603 |
| 4189 | C2orf18   | 54978 | 4.69E-07    | 0.686884323  |
| 4190 | C2orf42   | 54980 | 0.000254719 | -0.543819468 |
| 4191 | Unknown   | 54982 | 7.16E-09    | 0.752639179  |
| 4192 | C1orf123  | 54987 | 0.000515946 | 0.521785614  |
| 4193 | ACSM5     | 54988 | 6.14E-07    | 0.682152542  |
| 4194 | ZNF770    | 54989 | 0.00033142  | -0.535894735 |
| 4195 | C1orf159  | 54991 | 2.31E-10    | 0.798424202  |
| 4196 | C20orf11  | 54994 | 0.000180775 | -0.553869801 |
| 4197 | OXSM      | 54995 | 0.006602392 | 0.424360211  |
| 4198 | AURKAIP1  | 54998 | 0.000233606 | -0.546431019 |
| 4199 | C11orf59  | 55004 | 0.000790603 | -0.507358698 |
| 4200 | FLJ20628  | 55006 | 0.002745951 | -0.461269691 |
| 4201 | PIH1D1    | 55011 | 0.000111782 | -0.567387261 |
| 4202 | CCDC109B  | 55013 | 0.000358796 | -0.533358123 |
| 4203 | 1-Mar     | 55016 | 8.61E-07    | 0.675907205  |
| 4204 | C17orf73  | 55018 | 0.000332638 | 0.535778602  |
| 4205 | PHIP      | 55023 | 0.007572151 | -0.418040547 |
| 4206 | FBXO34    | 55030 | 0.003109311 | -0.456404918 |
| 4207 | NOL8      | 55035 | 0.003820153 | -0.447868492 |
| 4208 | PTCD3     | 55037 | 0.002168435 | -0.470503358 |
| 4209 | PLEKHB2   | 55041 | 3.89E-05    | -0.594771959 |
| 4210 | MRPL20    | 55052 | 0.000544986 | -0.519977788 |
| 4211 | FLJ10038  | 55056 | 0.000656119 | -0.513754478 |
| 4212 | AIM1L     | 55057 | 0.006520958 | -0.424909952 |
| 4213 | SUSD4     | 55061 | 1.25E-09    | 0.776141438  |
| 4214 | ZCWPW1    | 55063 | 0.004150125 | -0.444407197 |
| 4215 | GPR172B   | 55065 | 4.29E-05    | 0.592348719  |
| 4216 | PDPR      | 55066 | 0.007472969 | 0.418669978  |
| 4217 | C7orf42   | 55069 | 0.000105028 | -0.569117485 |
| 4218 | DET1      | 55070 | 0.004748095 | -0.438705083 |
| 4219 | C9orf40   | 55071 | 9.56E-07    | 0.673980563  |
| 4220 | RNF31     | 55072 | 2.72E-10    | 0.796155774  |
| 4221 | LRRRC37A4 | 55073 | 1.99E-06    | 0.660124202  |
| 4222 | OXR1      | 55074 | 0.004883045 | -0.437492657 |
| 4223 | FEZF2     | 55079 | 0.000276539 | 0.54139169   |
| 4224 | TAPBPL    | 55080 | 0.002500364 | -0.465042044 |

|      |          |       |             |              |
|------|----------|-------|-------------|--------------|
| 4225 | ARGLU1   | 55082 | 0.003201915 | -0.455163323 |
| 4226 | SLC38A4  | 55089 | 0.001550268 | 0.483125729  |
| 4227 | SAMD4B   | 55095 | 0.000242959 | 0.54528512   |
| 4228 | WDR70    | 55100 | 3.29E-11    | 0.826396107  |
| 4229 | FLJ10241 | 55101 | 0.001963998 | -0.474226986 |
| 4230 | ATG2B    | 55102 | 0.002926407 | -0.458776905 |
| 4231 | BSDC1    | 55108 | 9.12E-06    | -0.628685031 |
| 4232 | XKR8     | 55113 | 0.001639179 | -0.481072658 |
| 4233 | TMEM39B  | 55116 | 0.008282184 | -0.413854282 |
| 4234 | SLC6A15  | 55117 | 0.00011694  | 0.566119032  |
| 4235 | FANCL    | 55120 | 0.000818748 | -0.506108621 |
| 4236 | C6orf166 | 55122 | 0.000344884 | -0.534634386 |
| 4237 | PIWIL2   | 55124 | 1.53E-05    | 0.617123751  |
| 4238 | ELP3     | 55140 | 4.61E-05    | 0.590522224  |
| 4239 | LRRC8D   | 55144 | 0.005990501 | -0.42856717  |
| 4240 | PAPD1    | 55149 | 0.00140816  | -0.486721941 |
| 4241 | FLJ10490 | 55150 | 3.82E-10    | 0.791727329  |
| 4242 | DALRD3   | 55152 | 0.003767834 | -0.448457977 |
| 4243 | DARS2    | 55157 | 1.82E-07    | 0.703305512  |
| 4244 | MSL2L1   | 55167 | 1.16E-09    | 0.777150379  |
| 4245 | KLHL11   | 55175 | 6.22E-09    | 0.75459655   |
| 4246 | FAM82C   | 55177 | 1.87E-10    | 0.801316234  |
| 4247 | RIF1     | 55183 | 0.002286533 | -0.468472413 |
| 4248 | SLC25A36 | 55186 | 0.001536456 | -0.483493934 |
| 4249 | NUDT11   | 55190 | 0.005052235 | 0.436044732  |
| 4250 | DNAJC17  | 55192 | 0.005772776 | -0.430262171 |
| 4251 | P15RS    | 55197 | 0.003903608 | -0.446920703 |
| 4252 | Unknown  | 55199 | 0.009642722 | -0.406570919 |
| 4253 | MAP1S    | 55201 | 0.000816337 | -0.506219217 |
| 4254 | GOLPH3L  | 55204 | 0.00346136  | -0.451966633 |
| 4255 | ZNF532   | 55205 | 0.008309008 | -0.413711926 |
| 4256 | SBNO1    | 55206 | 0.00113097  | 0.494666611  |
| 4257 | ARL8B    | 55207 | 0.004280451 | -0.443075235 |
| 4258 | DPPA4    | 55211 | 0.003172435 | 0.455526774  |
| 4259 | TMLHE    | 55217 | 0.009614102 | 0.40671051   |
| 4260 | EXDL2    | 55218 | 4.98E-09    | 0.757564781  |
| 4261 | KLHDC8A  | 55220 | 0.001860505 | 0.476245158  |
| 4262 | LRRC20   | 55222 | 1.69E-09    | 0.772139739  |
| 4263 | TRIM62   | 55223 | 2.94E-07    | 0.695084688  |
| 4264 | ETNK2    | 55224 | 1.68E-07    | 0.704595641  |
| 4265 | NAT10    | 55226 | 0.006476066 | -0.42523467  |
| 4266 | FLJ10781 | 55228 | 0.004282714 | -0.443040344 |
| 4267 | CCDC87   | 55231 | 1.97E-06    | 0.660370337  |
| 4268 | FLJ10815 | 55238 | 0.008929003 | -0.410230692 |
| 4269 | C1orf75  | 55248 | 5.88E-05    | 0.584289373  |

|      |           |       |             |              |
|------|-----------|-------|-------------|--------------|
| 4270 | ELP2      | 55250 | 0.00842626  | -0.412981387 |
| 4271 | PCMTD2    | 55251 | 0.000117286 | -0.566027421 |
| 4272 | TMEM39A   | 55254 | 0.001911319 | -0.475224846 |
| 4273 | THNSL2    | 55258 | 0.009856772 | -0.40550554  |
| 4274 | PSPC1     | 55269 | 0.000240488 | -0.54557796  |
| 4275 | IMP3      | 55272 | 0.004529735 | -0.440673435 |
| 4276 | PHF10     | 55274 | 0.006944882 | -0.422076508 |
| 4277 | VPS53     | 55275 | 1.71E-09    | 0.771927952  |
| 4278 | QRSL1     | 55278 | 6.33E-06    | 0.636654475  |
| 4279 | CWF19L1   | 55280 | 0.000681543 | 0.512451298  |
| 4280 | ACOXL     | 55289 | 5.20E-11    | 0.81994853   |
| 4281 | UEVLD     | 55293 | 0.009773614 | 0.405902259  |
| 4282 | RNF121    | 55298 | 0.001354545 | -0.48823869  |
| 4283 | GIMAP4    | 55303 | 0.00122958  | 0.491690131  |
| 4284 | SLC29A3   | 55315 | 6.05E-07    | 0.682417206  |
| 4285 | RSAD1     | 55316 | 1.14E-06    | 0.670779376  |
| 4286 | C20orf46  | 55321 | 1.16E-05    | 0.623398536  |
| 4287 | ABCF3     | 55324 | 0.00848814  | -0.412621968 |
| 4288 | LIN7C     | 55327 | 0.005999881 | -0.42848232  |
| 4289 | DRAM      | 55332 | 4.21E-06    | 0.645132073  |
| 4290 | SYNJ2BP   | 55333 | 0.003330843 | -0.453536926 |
| 4291 | GIMAP5    | 55340 | 2.36E-08    | 0.735433167  |
| 4292 | STRBP     | 55342 | 0.002229484 | -0.469468416 |
| 4293 | TCP11L1   | 55346 | 0.001035935 | 0.497771065  |
| 4294 | ABHD10    | 55347 | 8.85E-10    | 0.780983891  |
| 4295 | VNN3      | 55350 | 1.14E-10    | 0.808001704  |
| 4296 | TMEM63B   | 55362 | 1.42E-09    | 0.774504497  |
| 4297 | IMPACT    | 55364 | 0.007358482 | -0.419370287 |
| 4298 | LGR4      | 55366 | 0.001923539 | -0.474994958 |
| 4299 | PPP4R1L   | 55370 | 1.43E-09    | 0.77436218   |
| 4300 | TMCO6     | 55374 | 0.00169625  | -0.4798023   |
| 4301 | MEG3      | 55384 | 4.25E-06    | 0.644903959  |
| 4302 | PRO2214   | 55387 | 1.33E-07    | 0.708473302  |
| 4303 | PRO2266   | 55389 | 4.41E-11    | 0.821950849  |
| 4304 | CYorf14   | 55410 | 6.57E-11    | 0.815428141  |
| 4305 | PRO2964   | 55415 | 5.07E-10    | 0.788031283  |
| 4306 | C17orf85  | 55421 | 0.007137927 | -0.420853295 |
| 4307 | SIRPG     | 55423 | 2.50E-08    | 0.734501175  |
| 4308 | ALS2CR2   | 55437 | 0.007900701 | -0.416090141 |
| 4309 | C14orf167 | 55449 | 0.003292861 | -0.454013483 |
| 4310 | PARL      | 55486 | 0.004168824 | -0.444224968 |
| 4311 | H2AFY2    | 55506 | 2.99E-06    | 0.652071089  |
| 4312 | GPRC5D    | 55507 | 1.32E-05    | 0.62037925   |
| 4313 | SAGE1     | 55511 | 5.12E-06    | 0.641079077  |
| 4314 | SVOP      | 55530 | 0.000180593 | 0.553901759  |



|      |          |       |             |              |
|------|----------|-------|-------------|--------------|
| 4315 | SLC30A10 | 55532 | 1.44E-06    | 0.666297161  |
| 4316 | CDCA7L   | 55536 | 0.003343486 | -0.453380308 |
| 4317 | KCNQ1DN  | 55539 | 2.27E-06    | 0.657539028  |
| 4318 | IL17RB   | 55540 | 2.20E-07    | 0.700042983  |
| 4319 | RBM38    | 55544 | 0.001415685 | -0.486492555 |
| 4320 | ENOSF1   | 55556 | 0.007039372 | -0.421459844 |
| 4321 | PLXNA3   | 55558 | 0.001834109 | 0.476802882  |
| 4322 | CDC42BPG | 55561 | 2.59E-11    | 0.830804988  |
| 4323 | DNAH3    | 55567 | 5.60E-10    | 0.786734725  |
| 4324 | FOXRED1  | 55572 | 0.000720718 | -0.510501964 |
| 4325 | CDV3     | 55573 | 0.003374309 | -0.453001343 |
| 4326 | STAB2    | 55576 | 3.23E-10    | 0.794012047  |
| 4327 | NAGK     | 55577 | 7.53E-08    | 0.717451171  |
| 4328 | UBE2Q1   | 55585 | 0.001914058 | -0.475168731 |
| 4329 | VEZT     | 55591 | 0.005071864 | -0.435870755 |
| 4330 | ZCCHC8   | 55596 | 0.000742486 | -0.509562892 |
| 4331 | CDKN2AIP | 55602 | 0.002942791 | -0.458563832 |
| 4332 | FAM46A   | 55603 | 0.000126455 | 0.563901617  |
| 4333 | ANKRD10  | 55608 | 0.006492996 | -0.425109546 |
| 4334 | ZNF280C  | 55609 | 0.008112442 | -0.414825282 |
| 4335 | C20orf42 | 55612 | 9.69E-09    | 0.748368464  |
| 4336 | TASP1    | 55617 | 0.001393354 | -0.487121755 |
| 4337 | TTC27    | 55622 | 0.006935655 | 0.422137806  |
| 4338 | THUMPD1  | 55623 | 0.000743308 | -0.509501249 |
| 4339 | POMGNT1  | 55624 | 0.000204582 | -0.550319122 |
| 4340 | AMBRA1   | 55626 | 1.14E-05    | -0.623775958 |
| 4341 | ZNF407   | 55628 | 0.001458387 | -0.485431712 |
| 4342 | SLC39A4  | 55630 | 0.008373334 | -0.413311321 |
| 4343 | TBC1D22B | 55633 | 1.44E-05    | 0.618443229  |
| 4344 | DEPDC1   | 55635 | 2.99E-08    | 0.731745667  |
| 4345 | BTBD2    | 55643 | 0.001309687 | -0.489410437 |
| 4346 | OSGEP    | 55644 | 0.008998692 | -0.409850505 |
| 4347 | PIGV     | 55650 | 0.001022665 | -0.498242854 |
| 4348 | NOLA2    | 55651 | 0.000543272 | -0.520079207 |
| 4349 | FLJ20489 | 55652 | 0.000404758 | -0.529545253 |
| 4350 | BCAS4    | 55653 | 6.46E-06    | 0.636192651  |
| 4351 | INTS8    | 55656 | 0.000878816 | -0.503659745 |
| 4352 | PRPF40A  | 55660 | 0.002230963 | -0.469433965 |
| 4353 | DDX27    | 55661 | 0.000109567 | -0.567960046 |
| 4354 | HIF1AN   | 55662 | 0.000590244 | -0.517369152 |
| 4355 | NPLOC4   | 55666 | 0.000571486 | -0.518393679 |
| 4356 | SMEK1    | 55671 | 3.81E-05    | 0.595306306  |
| 4357 | NBPF1    | 55672 | 9.00E-06    | 0.629000499  |
| 4358 | IWS1     | 55677 | 9.75E-06    | -0.627201912 |
| 4359 | KIAA1310 | 55683 | 0.000874119 | -0.503854462 |

|      |          |       |             |              |
|------|----------|-------|-------------|--------------|
| 4360 | PACS1    | 55690 | 1.37E-05    | 0.619555843  |
| 4361 | RBM22    | 55696 | 0.001150203 | -0.494051699 |
| 4362 | VAC14    | 55697 | 1.55E-06    | 0.664976922  |
| 4363 | IARS2    | 55699 | 0.003349537 | -0.453301193 |
| 4364 | MAP7D1   | 55700 | 0.003329054 | -0.453567694 |
| 4365 | CCDC88A  | 55704 | 3.21E-07    | 0.693514346  |
| 4366 | NECAP2   | 55707 | 5.25E-05    | -0.587300428 |
| 4367 | MLSTD1   | 55711 | 4.45E-09    | 0.759272719  |
| 4368 | POLR3E   | 55718 | 0.000732413 | -0.509981068 |
| 4369 | TSR1     | 55720 | 0.006883252 | -0.4224696   |
| 4370 | C12orf11 | 55726 | 0.002794923 | -0.460553985 |
| 4371 | ATF7IP   | 55729 | 0.004258462 | -0.443308    |
| 4372 | C17orf63 | 55731 | 3.25E-05    | 0.599215548  |
| 4373 | ZFP64    | 55734 | 0.002966597 | 0.458233296  |
| 4374 | VPS35    | 55737 | 0.0057013   | 0.430779583  |
| 4375 | ARFGAP1  | 55738 | 0.005632281 | -0.431348741 |
| 4376 | FLJ10769 | 55739 | 0.000347406 | -0.53438175  |
| 4377 | EDEM2    | 55741 | 0.000526816 | -0.521076655 |
| 4378 | NUP133   | 55746 | 0.003582357 | -0.450561623 |
| 4379 | CCAR1    | 55749 | 1.18E-05    | -0.622924687 |
| 4380 | CDK5RAP2 | 55755 | 8.36E-07    | 0.676473501  |
| 4381 | RCOR3    | 55758 | 0.002392043 | -0.466817015 |
| 4382 | WDR12    | 55759 | 0.000103309 | -0.569588391 |
| 4383 | EXOC1    | 55763 | 0.000313559 | -0.537591636 |
| 4384 | NGLY1    | 55768 | 6.46E-05    | -0.58190076  |
| 4385 | PRR11    | 55771 | 0.008742655 | -0.411245282 |
| 4386 | TDP1     | 55775 | 2.73E-06    | 0.65394529   |
| 4387 | C6orf70  | 55780 | 0.003421825 | -0.452421938 |
| 4388 | FGD6     | 55785 | 2.44E-06    | 0.656141258  |
| 4389 | CXorf15  | 55787 | 0.008096045 | -0.414935336 |
| 4390 | ChGn     | 55790 | 0.000689906 | 0.512043594  |
| 4391 | PCID2    | 55795 | 0.000112551 | -0.567151427 |
| 4392 | HR       | 55806 | 0.001691709 | 0.479899563  |
| 4393 | SAC      | 55811 | 4.27E-10    | 0.790255215  |
| 4394 | JMJD1A   | 55818 | 4.60E-05    | -0.590586276 |
| 4395 | VPS11    | 55823 | 0.000477967 | -0.524284628 |
| 4396 | IQWD1    | 55827 | 0.003871288 | -0.447274467 |
| 4397 | GLT8D1   | 55830 | 1.41E-05    | -0.618885183 |
| 4398 | CAND1    | 55832 | 0.000346813 | -0.53444031  |
| 4399 | UBAP2    | 55833 | 0.006590844 | -0.424447624 |
| 4400 | CENPN    | 55839 | 1.09E-09    | 0.777970494  |
| 4401 | ARHGAP15 | 55843 | 3.07E-08    | 0.731317248  |
| 4402 | C3orf10  | 55845 | 0.000905822 | -0.502620287 |
| 4403 | ITFG2    | 55846 | 0.00811112  | -0.41483681  |
| 4404 | CISD1    | 55847 | 0.001421378 | -0.486354899 |

|      |          |       |             |              |
|------|----------|-------|-------------|--------------|
| 4405 | USE1     | 55850 | 0.000983579 | -0.49964148  |
| 4406 | TEX2     | 55852 | 0.000334261 | -0.535604237 |
| 4407 | ZC3H15   | 55854 | 9.26E-05    | -0.572483677 |
| 4408 | C20orf19 | 55857 | 0.005439508 | -0.432805153 |
| 4409 | ACTR10   | 55860 | 0.001810808 | -0.477287085 |
| 4410 | ECHDC1   | 55862 | 0.003635309 | -0.449945798 |
| 4411 | SLC22A11 | 55867 | 1.66E-07    | 0.704765125  |
| 4412 | ASH1L    | 55870 | 0.000907468 | -0.50254943  |
| 4413 | CBWD1    | 55871 | 0.00767149  | -0.417431639 |
| 4414 | GABRQ    | 55879 | 0.000185407 | 0.553166792  |
| 4415 | ZNF167   | 55888 | 0.006678581 | -0.423819527 |
| 4416 | LENEP    | 55891 | 7.85E-08    | 0.716788517  |
| 4417 | ZNF395   | 55893 | 0.006991046 | -0.421760342 |
| 4418 | MESP1    | 55897 | 0.000331336 | 0.535915132  |
| 4419 | UNC45A   | 55898 | 0.000338201 | -0.535244255 |
| 4420 | ZNF302   | 55900 | 2.42E-07    | 0.69835029   |
| 4421 | ACSS2    | 55902 | 0.006822475 | -0.422881394 |
| 4422 | MLL5     | 55904 | 0.00243561  | -0.466114148 |
| 4423 | ZNF313   | 55905 | 0.000352251 | -0.533926274 |
| 4424 | KIAA1166 | 55906 | 8.87E-11    | 0.811451616  |
| 4425 | LOC55908 | 55908 | 5.21E-07    | 0.68507071   |
| 4426 | ERBB2IP  | 55914 | 0.008160937 | -0.414525057 |
| 4427 | LANCL2   | 55915 | 0.004742705 | 0.438751721  |
| 4428 | RCC2     | 55920 | 0.006678581 | -0.423819376 |
| 4429 | C1orf183 | 55924 | 1.30E-11    | 0.847380766  |
| 4430 | DMAPI    | 55929 | 0.000503936 | -0.522528022 |
| 4431 | MYO5C    | 55930 | 0.007398041 | -0.419137142 |
| 4432 | APOM     | 55937 | 0.004069239 | 0.445195951  |
| 4433 | LIN37    | 55957 | 2.97E-06    | 0.652223389  |
| 4434 | 3-Sep    | 55964 | 1.98E-05    | 0.611188331  |
| 4435 | NSFL1C   | 55968 | 0.001337375 | -0.488671991 |
| 4436 | RAG1AP1  | 55974 | 0.005091721 | -0.435695615 |
| 4437 | NXF5     | 55998 | 1.82E-06    | 0.661869271  |
| 4438 | NXF3     | 56000 | 7.46E-08    | 0.717588631  |
| 4439 | NXF2     | 56001 | 3.67E-07    | 0.691275964  |
| 4440 | PDGFC    | 56034 | 0.000950499 | -0.500823557 |
| 4441 | UBFD1    | 56061 | 3.85E-05    | -0.595091156 |
| 4442 | KLHL4    | 56062 | 0.000135616 | 0.56199089   |
| 4443 | C1orf91  | 56063 | 7.35E-08    | 0.717837329  |
| 4444 | Unknown  | 56097 | 3.17E-07    | 0.693722277  |
| 4445 | Unknown  | 56098 | 6.25E-11    | 0.816322986  |
| 4446 | Unknown  | 56099 | 1.12E-05    | 0.624041201  |
| 4447 | Unknown  | 56105 | 0.001123385 | -0.494884674 |
| 4448 | Unknown  | 56107 | 5.78E-07    | 0.683219386  |
| 4449 | Unknown  | 56114 | 0.000119039 | 0.565593465  |

|      |           |       |             |              |
|------|-----------|-------|-------------|--------------|
| 4450 | PCDHB15   | 56121 | 2.44E-06    | 0.656081121  |
| 4451 | PCDHB11   | 56125 | 2.21E-06    | 0.658076124  |
| 4452 | PCDHB9    | 56127 | 2.05E-07    | 0.701202424  |
| 4453 | PCDHB6    | 56130 | 9.96E-11    | 0.809829995  |
| 4454 | PCDHB4    | 56131 | 2.41E-10    | 0.797724844  |
| 4455 | PCDHB3    | 56132 | 0.004941995 | 0.436979919  |
| 4456 | Unknown   | 56134 | 4.54E-09    | 0.758982344  |
| 4457 | Unknown   | 56135 | 1.65E-06    | 0.663786459  |
| 4458 | PCDHA6    | 56142 | 0.000248202 | 0.544631526  |
| 4459 | Unknown   | 56143 | 0.007556499 | -0.41813623  |
| 4460 | Unknown   | 56145 | 6.59E-11    | 0.815247336  |
| 4461 | Unknown   | 56146 | 2.06E-05    | 0.61013201   |
| 4462 | TEX15     | 56154 | 0.001133176 | 0.494592057  |
| 4463 | TEX13B    | 56156 | 7.93E-07    | 0.677443765  |
| 4464 | TEX13A    | 56157 | 5.99E-08    | 0.721039957  |
| 4465 | RNF17     | 56163 | 4.24E-06    | 0.644945686  |
| 4466 | STK31     | 56164 | 3.02E-07    | 0.694555615  |
| 4467 | FAM54B    | 56181 | 0.002075693 | -0.472181465 |
| 4468 | ZNF253    | 56242 | 1.55E-08    | 0.741687865  |
| 4469 | BTNL2     | 56244 | 0.003514454 | 0.451363788  |
| 4470 | MRAP      | 56246 | 5.51E-09    | 0.756239539  |
| 4471 | RNF20     | 56254 | 0.000594394 | -0.517126867 |
| 4472 | GKN1      | 56287 | 0.009818197 | -0.405688736 |
| 4473 | IL1F9     | 56300 | 2.79E-10    | 0.795785465  |
| 4474 | TRPV5     | 56302 | 1.86E-10    | 0.801452514  |
| 4475 | Unknown   | 56311 | 0.001603931 | 0.481879179  |
| 4476 | LTB4R2    | 56413 | 2.35E-09    | 0.767742947  |
| 4477 | CTPS2     | 56474 | 0.000709144 | -0.511106771 |
| 4478 | EIF4ENIF1 | 56478 | 2.72E-05    | -0.603506986 |
| 4479 | TUBB4Q    | 56604 | 3.81E-05    | 0.595354451  |
| 4480 | ERO1LB    | 56605 | 0.001457299 | 0.485472057  |
| 4481 | DIABLO    | 56616 | 0.000495121 | -0.523102699 |
| 4482 | INPP5E    | 56623 | 7.43E-07    | 0.678603781  |
| 4483 | BCCIP     | 56647 | 0.002987595 | -0.457964009 |
| 4484 | C18orf2   | 56651 | 1.85E-08    | 0.739163691  |
| 4485 | OR2S2     | 56656 | 2.17E-08    | 0.736713131  |
| 4486 | TRIM39    | 56658 | 1.06E-07    | 0.712054685  |
| 4487 | KCNK13    | 56659 | 0.000651511 | 0.513993581  |
| 4488 | PANX2     | 56666 | 0.007755547 | 0.416941098  |
| 4489 | SUCNR1    | 56670 | 6.33E-06    | 0.636657373  |
| 4490 | C11orf17  | 56672 | 7.36E-06    | 0.633426664  |
| 4491 | ASCL3     | 56676 | 2.41E-08    | 0.735145396  |
| 4492 | SAR1A     | 56681 | 0.000223941 | -0.547682304 |
| 4493 | C21orf59  | 56683 | 0.004539873 | -0.440581919 |
| 4494 | JPH1      | 56704 | 2.79E-11    | 0.828951004  |

|      |           |       |             |              |
|------|-----------|-------|-------------|--------------|
| 4495 | SLC2A4RG  | 56731 | 0.005373936 | 0.433317335  |
| 4496 | BARHL1    | 56751 | 0.000427447 | 0.527807968  |
| 4497 | FMN2      | 56776 | 2.12E-06    | 0.658908937  |
| 4498 | ZC3HAV1   | 56829 | 0.002332886 | -0.467762961 |
| 4499 | SLAMF8    | 56833 | 1.86E-07    | 0.702848964  |
| 4500 | Unknown   | 56848 | 0.003189841 | -0.455310366 |
| 4501 | GRIPAP1   | 56850 | 0.000576863 | -0.518114276 |
| 4502 | C15orf24  | 56851 | 0.001356364 | -0.488168452 |
| 4503 | RAD18     | 56852 | 2.48E-11    | 0.831519455  |
| 4504 | UGCGL1    | 56886 | 0.000537905 | -0.520396809 |
| 4505 | KCMF1     | 56888 | 0.003731278 | -0.448855938 |
| 4506 | TM9SF3    | 56889 | 0.000807961 | -0.506636097 |
| 4507 | MDM1      | 56890 | 0.006265596 | -0.42664682  |
| 4508 | LGALS14   | 56891 | 3.42E-05    | 0.597986044  |
| 4509 | UBQLN4    | 56893 | 0.009380799 | -0.407862012 |
| 4510 | AGPAT3    | 56894 | 0.00250261  | -0.465006388 |
| 4511 | ANKS1B    | 56899 | 1.52E-09    | 0.773569265  |
| 4512 | C1orf119  | 56900 | 0.002476825 | -0.465452716 |
| 4513 | PNO1      | 56902 | 3.13E-07    | 0.693980913  |
| 4514 | STARD7    | 56910 | 0.001021893 | -0.4982715   |
| 4515 | C11orf60  | 56912 | 0.004192395 | -0.443991084 |
| 4516 | DHX33     | 56919 | 0.001657415 | -0.480662543 |
| 4517 | SEMA3G    | 56920 | 2.14E-09    | 0.768942404  |
| 4518 | MCCC1     | 56922 | 0.006492117 | -0.42512097  |
| 4519 | NMUR2     | 56923 | 7.42E-10    | 0.78322053   |
| 4520 | PAK6      | 56924 | 1.45E-07    | 0.707094212  |
| 4521 | NCLN      | 56926 | 0.002006048 | 0.473412424  |
| 4522 | SPPL2B    | 56928 | 2.39E-07    | 0.698601791  |
| 4523 | DUS3L     | 56931 | 6.25E-09    | 0.754502186  |
| 4524 | CA10      | 56934 | 1.04E-07    | 0.712337892  |
| 4525 | C14orf162 | 56936 | 4.58E-09    | 0.758793326  |
| 4526 | MRPS22    | 56945 | 0.000167441 | -0.556064826 |
| 4527 | C2orf33   | 56947 | 0.000298808 | -0.539037603 |
| 4528 | C14orf124 | 56948 | 0.0004402   | 0.5268773    |
| 4529 | C5orf15   | 56951 | 0.003076735 | -0.456833127 |
| 4530 | NIT2      | 56954 | 0.000765717 | -0.508505577 |
| 4531 | MEPE      | 56955 | 2.24E-10    | 0.798954589  |
| 4532 | SHD       | 56961 | 4.10E-08    | 0.726982917  |
| 4533 | WDR93     | 56964 | 3.26E-08    | 0.730435589  |
| 4534 | PARP6     | 56965 | 0.009739325 | -0.406094372 |
| 4535 | CEACAM19  | 56971 | 3.79E-11    | 0.824158965  |
| 4536 | PRDM11    | 56981 | 0.000361914 | 0.533024077  |
| 4537 | KTELC1    | 56983 | 0.000522378 | -0.521357798 |
| 4538 | PSMG2     | 56984 | 0.000708472 | -0.511152021 |
| 4539 | BBX       | 56987 | 0.00363614  | -0.449924171 |

|      |          |       |             |              |
|------|----------|-------|-------------|--------------|
| 4540 | CDC42SE2 | 56990 | 0.000424414 | -0.528053534 |
| 4541 | TOMM22   | 56993 | 2.10E-07    | 0.700829618  |
| 4542 | SLC12A9  | 56996 | 0.000202792 | -0.550583264 |
| 4543 | CABC1    | 56997 | 0.002477976 | -0.465431643 |
| 4544 | CTNNBIP1 | 56998 | 0.000344426 | -0.534676532 |
| 4545 | Unknown  | 57000 | 0.008932035 | 0.410212109  |
| 4546 | C7orf36  | 57002 | 0.006062552 | -0.428050061 |
| 4547 | CCDC47   | 57003 | 0.001475692 | -0.484963694 |
| 4548 | CABP4    | 57010 | 1.14E-05    | 0.62382415   |
| 4549 | AKR1B10  | 57016 | 3.50E-05    | 0.597444617  |
| 4550 | SLC17A7  | 57030 | 0.000176776 | 0.554533929  |
| 4551 | ANKMY2   | 57037 | 0.00062224  | -0.51555694  |
| 4552 | RARS2    | 57038 | 0.001179236 | -0.493164413 |
| 4553 | PLSCR3   | 57048 | 0.007257618 | 0.420036998  |
| 4554 | UTP3     | 57050 | 0.001507649 | -0.484178719 |
| 4555 | CHRNA10  | 57053 | 5.56E-09    | 0.756119799  |
| 4556 | DDX24    | 57062 | 0.00534583  | -0.433558564 |
| 4557 | C20orf32 | 57091 | 0.007889007 | 0.416158193  |
| 4558 | C1orf128 | 57095 | 0.002124635 | -0.471287206 |
| 4559 | RPGRIP1  | 57096 | 1.50E-07    | 0.706413511  |
| 4560 | PARP11   | 57097 | 3.90E-09    | 0.761075454  |
| 4561 | AVEN     | 57099 | 0.007539911 | -0.418231623 |
| 4562 | CYSLTR2  | 57105 | 0.000332646 | 0.535771801  |
| 4563 | PDSS2    | 57107 | 6.57E-08    | 0.719586425  |
| 4564 | TRPC7    | 57113 | 0.000725146 | 0.510302419  |
| 4565 | PGLYRP4  | 57115 | 2.95E-11    | 0.827779432  |
| 4566 | Unknown  | 57116 | 4.56E-05    | 0.59083852   |
| 4567 | INTS12   | 57117 | 0.003137581 | -0.456016703 |
| 4568 | GOPC     | 57120 | 0.002756974 | -0.461117114 |
| 4569 | NUP107   | 57122 | 0.000439499 | -0.526932843 |
| 4570 | PLXDC1   | 57125 | 1.49E-07    | 0.706609626  |
| 4571 | CD177    | 57126 | 1.78E-10    | 0.801986413  |
| 4572 | RHBG     | 57127 | 2.36E-06    | 0.65675854   |
| 4573 | CHMP1B   | 57132 | 1.94E-10    | 0.800805085  |
| 4574 | MAN1C1   | 57134 | 2.14E-05    | 0.609361946  |
| 4575 | C20orf3  | 57136 | 0.00899292  | -0.409886208 |
| 4576 | ADCK1    | 57143 | 3.97E-05    | 0.594264914  |
| 4577 | PAK7     | 57144 | 0.008639992 | 0.411774031  |
| 4578 | SCYL3    | 57147 | 0.002069721 | -0.472281772 |
| 4579 | KIAA1219 | 57148 | 6.37E-09    | 0.754251033  |
| 4580 | LYRM1    | 57149 | 0.003594914 | -0.450392857 |
| 4581 | TMEM63C  | 57156 | 0.009206028 | -0.408755286 |
| 4582 | PHTF2    | 57157 | 0.008420254 | -0.413024832 |
| 4583 | JPH2     | 57158 | 1.15E-09    | 0.777218109  |
| 4584 | SALL4    | 57167 | 1.56E-10    | 0.803909513  |

|      |          |       |             |              |
|------|----------|-------|-------------|--------------|
| 4585 | CAMK1G   | 57172 | 1.59E-09    | 0.77301542   |
| 4586 | CORO1B   | 57175 | 0.001429194 | -0.486165207 |
| 4587 | VARS2    | 57176 | 7.22E-09    | 0.75253831   |
| 4588 | ZMIZ1    | 57178 | 0.004693138 | -0.439197396 |
| 4589 | KIAA1191 | 57179 | 0.004465322 | -0.441254921 |
| 4590 | ACTR3B   | 57180 | 5.55E-05    | -0.585900849 |
| 4591 | SLC39A10 | 57181 | 0.005383799 | -0.433233721 |
| 4592 | Unknown  | 57190 | 0.000493108 | -0.523253215 |
| 4593 | VN1R1    | 57191 | 9.00E-05    | 0.573275759  |
| 4594 | MCOLN1   | 57192 | 0.000914347 | 0.502261515  |
| 4595 | ATP10A   | 57194 | 1.99E-07    | 0.701712403  |
| 4596 | KIAA0495 | 57212 | 0.000918994 | -0.502067168 |
| 4597 | THAP11   | 57215 | 0.003372591 | -0.453035205 |
| 4598 | TTC7A    | 57217 | 2.33E-05    | 0.607231438  |
| 4599 | KIAA1244 | 57221 | 3.70E-09    | 0.761797358  |
| 4600 | ERGIC1   | 57222 | 0.005067031 | -0.435911034 |
| 4601 | SMEK2    | 57223 | 0.000921655 | -0.50195288  |
| 4602 | LOC57228 | 57228 | 2.04E-09    | 0.769582748  |
| 4603 | SNX14    | 57231 | 3.49E-09    | 0.762569625  |
| 4604 | ZNF630   | 57232 | 1.68E-09    | 0.772202443  |
| 4605 | KIAA0509 | 57242 | 0.00063202  | 0.515007126  |
| 4606 | KIAA0114 | 57291 | 0.000328919 | -0.53613968  |
| 4607 | KIR2DL5A | 57292 | 0.001685219 | 0.480028661  |
| 4608 | CSRP2BP  | 57325 | 1.84E-07    | 0.703076893  |
| 4609 | RCN3     | 57333 | 2.98E-09    | 0.764669552  |
| 4610 | ZNF287   | 57336 | 9.63E-08    | 0.713592475  |
| 4611 | SENP7    | 57337 | 0.002652193 | -0.462676814 |
| 4612 | JPH3     | 57338 | 2.04E-10    | 0.800160092  |
| 4613 | GJD2     | 57369 | 0.001785236 | 0.477815858  |
| 4614 | AICDA    | 57379 | 0.005880495 | 0.429398005  |
| 4615 | RHOJ     | 57381 | 6.90E-10    | 0.784105259  |
| 4616 | NMRAL1   | 57407 | 0.0049599   | -0.43680009  |
| 4617 | AS3MT    | 57412 | 1.97E-09    | 0.770058798  |
| 4618 | BIRC6    | 57448 | 6.69E-07    | 0.680581833  |
| 4619 | KIAA1143 | 57456 | 0.000957606 | -0.500547383 |
| 4620 | GATAD2B  | 57459 | 9.99E-07    | 0.673151783  |
| 4621 | KIAA1161 | 57462 | 0.000425875 | 0.527928196  |
| 4622 | AMIGO1   | 57463 | 3.46E-05    | 0.597740863  |
| 4623 | FAM40B   | 57464 | 1.35E-11    | 0.842276875  |
| 4624 | SLC12A5  | 57468 | 9.70E-09    | 0.748340348  |
| 4625 | LRRC47   | 57470 | 5.36E-05    | -0.58675816  |
| 4626 | CNOT6    | 57472 | 0.002181967 | -0.470275574 |
| 4627 | ZNF512B  | 57473 | 9.93E-05    | -0.570629638 |
| 4628 | SHROOM4  | 57477 | 0.000762528 | 0.508657567  |
| 4629 | NLN      | 57486 | 0.009751025 | -0.40602069  |

|      |           |       |             |              |
|------|-----------|-------|-------------|--------------|
| 4630 | FAM62B    | 57488 | 0.004236163 | -0.443560175 |
| 4631 | KIAA1239  | 57495 | 2.55E-07    | 0.697510753  |
| 4632 | KIDINS220 | 57498 | 0.002269009 | -0.468775192 |
| 4633 | MTA3      | 57504 | 0.001639095 | 0.481083105  |
| 4634 | INTS2     | 57508 | 0.004379424 | -0.442067083 |
| 4635 | GPR158    | 57512 | 7.58E-09    | 0.751837598  |
| 4636 | CDGAP     | 57514 | 0.00694848  | 0.422035878  |
| 4637 | STARD9    | 57519 | 5.97E-05    | 0.583924127  |
| 4638 | KIAA1303  | 57521 | 1.08E-08    | 0.74683045   |
| 4639 | KIAA1305  | 57523 | 0.009062645 | -0.409492451 |
| 4640 | Unknown   | 57524 | 1.07E-05    | 0.62509233   |
| 4641 | KCTD16    | 57528 | 1.48E-11    | 0.841277494  |
| 4642 | RGAG1     | 57529 | 6.36E-09    | 0.754270143  |
| 4643 | NUFIP2    | 57532 | 0.002320211 | -0.467950123 |
| 4644 | TBC1D14   | 57533 | 0.001705877 | -0.479586999 |
| 4645 | MICAL3    | 57553 | 5.96E-08    | 0.721144347  |
| 4646 | NLGN2     | 57555 | 1.68E-06    | 0.663388891  |
| 4647 | SEMA6A    | 57556 | 6.75E-07    | 0.680388653  |
| 4648 | USP35     | 57558 | 0.004267688 | -0.443203753 |
| 4649 | ARRDC3    | 57561 | 0.00094145  | -0.501146188 |
| 4650 | ARHGAP20  | 57569 | 0.004451202 | 0.441379933  |
| 4651 | TRMT5     | 57570 | 0.004164268 | -0.444280068 |
| 4652 | DOCK6     | 57572 | 0.000852094 | 0.504759986  |
| 4653 | KCNT1     | 57582 | 0.003483548 | 0.451711843  |
| 4654 | TMEM181   | 57583 | 0.000260862 | 0.543125374  |
| 4655 | ARHGAP21  | 57584 | 9.22E-05    | -0.57260162  |
| 4656 | CRAMP1L   | 57585 | 1.87E-08    | 0.738967166  |
| 4657 | KIAA1432  | 57589 | 3.99E-09    | 0.760704142  |
| 4658 | MKL1      | 57591 | 7.75E-09    | 0.751477915  |
| 4659 | ZNF687    | 57592 | 0.000418261 | 0.52850611   |
| 4660 | BEGAIN    | 57596 | 0.000157157 | 0.557878352  |
| 4661 | BAHCC1    | 57597 | 3.16E-10    | 0.794313876  |
| 4662 | PITPNM2   | 57605 | 2.60E-07    | 0.697150908  |
| 4663 | SLAIN2    | 57606 | 9.21E-06    | 0.628465073  |
| 4664 | KIAA1462  | 57608 | 0.001109313 | 0.49532817   |
| 4665 | DIP2B     | 57609 | 0.007647134 | -0.417580898 |
| 4666 | RANBP10   | 57610 | 3.28E-06    | 0.650148655  |
| 4667 | ISLR2     | 57611 | 0.00146307  | 0.485308022  |
| 4668 | KIAA1468  | 57614 | 0.001039532 | -0.497637091 |
| 4669 | SHROOM3   | 57619 | 0.009606137 | -0.40675393  |
| 4670 | ZBTB2     | 57621 | 0.008299302 | -0.413762959 |
| 4671 | ZFAT1     | 57623 | 1.52E-05    | 0.617223263  |
| 4672 | KIAA1486  | 57624 | 4.78E-08    | 0.724603224  |
| 4673 | HCN3      | 57657 | 1.30E-11    | 0.843855675  |
| 4674 | ZBTB4     | 57659 | 4.89E-05    | -0.58904433  |



|      |              |       |             |              |
|------|--------------|-------|-------------|--------------|
| 4675 | KIAA1542     | 57661 | 0.001478939 | -0.484882944 |
| 4676 | KIAA1543     | 57662 | 0.00746133  | -0.418745786 |
| 4677 | PLEKHA4      | 57664 | 0.000192181 | 0.552120091  |
| 4678 | RDH14        | 57665 | 0.002193958 | -0.470077649 |
| 4679 | KIAA1553     | 57673 | 0.006622274 | -0.424225007 |
| 4680 | CHD8         | 57680 | 0.005687194 | -0.430892909 |
| 4681 | CACHD1       | 57685 | 0.001460138 | -0.485388208 |
| 4682 | KIAA1576     | 57687 | 5.68E-05    | 0.585266987  |
| 4683 | LRRC4C       | 57689 | 5.65E-09    | 0.75587032   |
| 4684 | ZNF317       | 57693 | 0.000552136 | 0.519553637  |
| 4685 | FANCM        | 57697 | 1.46E-08    | 0.742611561  |
| 4686 | KIAA1598     | 57698 | 0.008832376 | -0.410779703 |
| 4687 | KIAA1600     | 57700 | 0.003358835 | -0.453193831 |
| 4688 | WDFY4        | 57705 | 1.59E-09    | 0.773008275  |
| 4689 | KIAA1609     | 57707 | 5.34E-06    | 0.640216122  |
| 4690 | SLC7A14      | 57709 | 5.57E-10    | 0.786805317  |
| 4691 | ZNF529       | 57711 | 0.008918172 | -0.410298505 |
| 4692 | SEMA4G       | 57715 | 2.60E-09    | 0.766292423  |
| 4693 | TMEM16H      | 57719 | 1.89E-10    | 0.80118539   |
| 4694 | GPR107       | 57720 | 0.004099012 | -0.444903612 |
| 4695 | KIAA1627     | 57721 | 0.0001273   | -0.563699229 |
| 4696 | KIAA1632     | 57724 | 0.003621567 | 0.450105852  |
| 4697 | NCOA5        | 57727 | 0.001275296 | -0.490358448 |
| 4698 | SPTBN4       | 57731 | 5.42E-11    | 0.818936215  |
| 4699 | RBAK         | 57786 | 0.000691528 | -0.511963483 |
| 4700 | SF4          | 57794 | 0.001481268 | -0.484821975 |
| 4701 | FAM5B        | 57795 | 1.44E-06    | 0.666394906  |
| 4702 | DKFZP761C171 | 57796 | 7.69E-06    | 0.632494629  |
| 4703 | HAMP         | 57817 | 0.002663429 | 0.462522703  |
| 4704 | G6PC2        | 57818 | 3.74E-09    | 0.761661267  |
| 4705 | SLAMF7       | 57823 | 2.66E-05    | 0.604018855  |
| 4706 | HMHB1        | 57824 | 5.28E-09    | 0.756807354  |
| 4707 | C6orf47      | 57827 | 0.002132098 | -0.471155016 |
| 4708 | C19orf15     | 57828 | 5.94E-06    | 0.63796184   |
| 4709 | ZP4          | 57829 | 1.65E-05    | 0.615403386  |
| 4710 | CYP4F11      | 57834 | 6.11E-10    | 0.785591812  |
| 4711 | CADM3        | 57863 | 3.64E-10    | 0.792446827  |
| 4712 | Unknown      | 57876 | 1.54E-06    | 0.665076666  |
| 4713 | PTBP2        | 58155 | 8.78E-07    | 0.675527763  |
| 4714 | NEUROD4      | 58158 | 0.003421657 | 0.452429021  |
| 4715 | CTDSP1       | 58190 | 0.00224139  | -0.469242343 |
| 4716 | SQRDL        | 58472 | 0.007639431 | 0.417625173  |
| 4717 | MS4A7        | 58475 | 5.22E-05    | 0.587435325  |
| 4718 | ENOPH1       | 58478 | 0.000318174 | 0.537131181  |
| 4719 | NLRC4        | 58484 | 5.29E-06    | 0.640410861  |

|      |          |       |             |              |
|------|----------|-------|-------------|--------------|
| 4720 | TRAPPC1  | 58485 | 0.009789114 | -0.405833468 |
| 4721 | ZBED5    | 58486 | 0.000126403 | -0.563918016 |
| 4722 | CREBZF   | 58487 | 0.000539393 | -0.520306492 |
| 4723 | FAM108C1 | 58489 | 1.39E-06    | 0.666994328  |
| 4724 | JAM2     | 58494 | 2.18E-09    | 0.768650523  |
| 4725 | OVOL2    | 58495 | 0.009976242 | -0.40492803  |
| 4726 | PRUNE    | 58497 | 0.009941556 | -0.405084371 |
| 4727 | PROL1    | 58503 | 4.42E-07    | 0.687935345  |
| 4728 | ARHGAP22 | 58504 | 0.00455955  | 0.440414683  |
| 4729 | MLL3     | 58508 | 0.000816572 | -0.506204914 |
| 4730 | PRODH2   | 58510 | 2.83E-08    | 0.732567188  |
| 4731 | DLGAP3   | 58512 | 4.30E-06    | 0.644684699  |
| 4732 | EPS15L1  | 58513 | 1.94E-07    | 0.702180613  |
| 4733 | SELK     | 58515 | 0.000172058 | -0.55528502  |
| 4734 | DMRT3    | 58524 | 5.16E-07    | 0.685267442  |
| 4735 | PRM3     | 58531 | 6.54E-10    | 0.784810323  |
| 4736 | TMEM8    | 58986 | 1.46E-06    | 0.666127056  |
| 4737 | IL21     | 59067 | 2.73E-06    | 0.653928254  |
| 4738 | ICEBERG  | 59082 | 3.36E-08    | 0.729905759  |
| 4739 | HIVEP3   | 59269 | 0.005817298 | -0.429913299 |
| 4740 | C21orf63 | 59271 | 6.90E-09    | 0.75314179   |
| 4741 | ACE2     | 59272 | 0.007488109 | 0.418570983  |
| 4742 | CACNG8   | 59283 | 1.57E-07    | 0.705706935  |
| 4743 | CACNG6   | 59285 | 2.64E-10    | 0.796559072  |
| 4744 | UBL5     | 59286 | 0.000748737 | -0.509270042 |
| 4745 | PRDM13   | 59336 | 4.09E-06    | 0.645705061  |
| 4746 | HRH4     | 59340 | 6.45E-07    | 0.681232082  |
| 4747 | SENP2    | 59343 | 8.36E-05    | 0.575210889  |
| 4748 | ALOXE3   | 59344 | 6.63E-06    | 0.635658108  |
| 4749 | KLHL12   | 59349 | 2.35E-05    | -0.60700687  |
| 4750 | FAM3A    | 60343 | 0.001375015 | -0.487627769 |
| 4751 | AVPI1    | 60370 | 8.96E-06    | 0.6291156    |
| 4752 | TSKS     | 60385 | 1.69E-05    | 0.614821867  |
| 4753 | SLC25A19 | 60386 | 0.000359476 | -0.533270177 |
| 4754 | EDA2R    | 60401 | 1.75E-09    | 0.771651385  |
| 4755 | TGIF2    | 60436 | 0.003737814 | -0.448783436 |
| 4756 | BACH2    | 60468 | 0.008168373 | 0.414474654  |
| 4757 | SLC5A7   | 60482 | 1.76E-08    | 0.739905928  |
| 4758 | TRMT11   | 60487 | 0.001573058 | -0.482577401 |
| 4759 | MRPS35   | 60488 | 0.00376933  | -0.4484386   |
| 4760 | PPCDC    | 60490 | 0.002251749 | -0.469061831 |
| 4761 | NIF3L1   | 60491 | 4.76E-07    | -0.686620556 |
| 4762 | CCDC90B  | 60492 | 0.004685389 | -0.439277544 |
| 4763 | HPSE2    | 60495 | 2.74E-06    | 0.653873199  |
| 4764 | AASDHPPT | 60496 | 0.00049206  | -0.52334893  |

|      |           |       |             |              |
|------|-----------|-------|-------------|--------------|
| 4765 | AGBL5     | 60509 | 0.000546017 | -0.519918141 |
| 4766 | C2orf43   | 60526 | 3.96E-08    | 0.727450575  |
| 4767 | SPCS3     | 60559 | 0.000479736 | -0.524139147 |
| 4768 | MAK10     | 60560 | 0.003431395 | -0.452308246 |
| 4769 | RINT1     | 60561 | 0.00573911  | -0.430512    |
| 4770 | SCOC      | 60592 | 0.004415278 | -0.441751832 |
| 4771 | DHX35     | 60625 | 4.15E-06    | 0.645412378  |
| 4772 | RIC8A     | 60626 | 0.00017849  | -0.554250593 |
| 4773 | GAS5      | 60674 | 0.003023156 | -0.457498571 |
| 4774 | PAPPA2    | 60676 | 3.17E-10    | 0.794277608  |
| 4775 | EEFSEC    | 60678 | 0.006895771 | -0.422389696 |
| 4776 | BRUNOL5   | 60680 | 4.21E-10    | 0.790480406  |
| 4777 | SMAP1     | 60682 | 2.96E-07    | 0.694931908  |
| 4778 | FLJ12716  | 60684 | 0.000130261 | -0.563073021 |
| 4779 | C14orf93  | 60686 | 0.006882184 | -0.422480732 |
| 4780 | C6orf85   | 63027 | 6.44E-07    | 0.681257236  |
| 4781 | ELA2A     | 63036 | 0.002533933 | -0.464538633 |
| 4782 | SRR       | 63826 | 0.000936438 | 0.501369856  |
| 4783 | ABHD4     | 63874 | 0.003649703 | 0.44976387   |
| 4784 | PKNOX2    | 63876 | 5.34E-11    | 0.819282218  |
| 4785 | C10orf84  | 63877 | 1.77E-05    | 0.613772137  |
| 4786 | RNF123    | 63891 | 3.92E-07    | 0.69011539   |
| 4787 | C14orf133 | 63894 | 9.91E-08    | 0.713147279  |
| 4788 | FAM38B    | 63895 | 0.008124781 | 0.414755507  |
| 4789 | HEATR6    | 63897 | 0.003156282 | -0.455753576 |
| 4790 | NSUN3     | 63899 | 8.93E-10    | 0.780860613  |
| 4791 | DUSP21    | 63904 | 2.67E-10    | 0.796396822  |
| 4792 | MANBAL    | 63905 | 0.001364246 | -0.487941885 |
| 4793 | GPATCH3   | 63906 | 8.23E-08    | 0.716099993  |
| 4794 | NAPB      | 63908 | 0.009047722 | -0.409573289 |
| 4795 | C20orf59  | 63910 | 0.001201483 | 0.492496462  |
| 4796 | ELMO2     | 63916 | 5.87E-07    | 0.682962626  |
| 4797 | GALNT11   | 63917 | 2.26E-05    | -0.607977819 |
| 4798 | LOC63920  | 63920 | 0.000653153 | -0.513909192 |
| 4799 | CIDEC     | 63924 | 1.59E-11    | 0.838582416  |
| 4800 | ANKRD5    | 63926 | 0.001634119 | 0.48120496   |
| 4801 | MRPS14    | 63931 | 0.009707453 | -0.40624962  |
| 4802 | C20orf67  | 63935 | 4.62E-06    | 0.643221264  |
| 4803 | GPSM3     | 63940 | 0.002657107 | 0.462608675  |
| 4804 | NEUROD6   | 63974 | 3.69E-10    | 0.792242718  |
| 4805 | PRDM14    | 63978 | 3.68E-10    | 0.792276614  |
| 4806 | PCGEM1    | 64002 | 0.000624605 | 0.515441257  |
| 4807 | TSPYL2    | 64061 | 2.48E-10    | 0.797425158  |
| 4808 | RBM26     | 64062 | 0.001739849 | -0.478813395 |
| 4809 | LHPP      | 64077 | 3.96E-11    | 0.823579762  |

|      |          |       |             |              |
|------|----------|-------|-------------|--------------|
| 4810 | GOLPH3   | 64083 | 0.00222921  | -0.469477958 |
| 4811 | CLSTN2   | 64084 | 0.003156282 | 0.455751905  |
| 4812 | GFRA4    | 64096 | 9.26E-05    | 0.572483917  |
| 4813 | CRLF2    | 64109 | 8.84E-09    | 0.749633875  |
| 4814 | NPVF     | 64111 | 5.02E-06    | 0.641488197  |
| 4815 | MOAP1    | 64112 | 0.001889851 | 0.475636944  |
| 4816 | DUS1L    | 64118 | 0.001552714 | -0.483069989 |
| 4817 | XYLT1    | 64131 | 8.65E-07    | 0.675812036  |
| 4818 | ZFYVE20  | 64145 | 4.20E-05    | -0.592878523 |
| 4819 | C17orf75 | 64149 | 0.000970115 | -0.500086903 |
| 4820 | CARD9    | 64170 | 0.002597781 | -0.463524851 |
| 4821 | SPATA1   | 64173 | 1.68E-05    | 0.614949005  |
| 4822 | DPEP2    | 64174 | 0.002757868 | 0.461079014  |
| 4823 | LEPRE1   | 64175 | 1.36E-06    | 0.667411896  |
| 4824 | FAM12B   | 64184 | 4.08E-07    | 0.689369062  |
| 4825 | C14orf4  | 64207 | 0.005255175 | -0.434326956 |
| 4826 | MMS19    | 64210 | 0.000651488 | -0.514003232 |
| 4827 | DNAJC1   | 64215 | 0.008340434 | -0.413537964 |
| 4828 | SEMA4A   | 64218 | 9.12E-06    | 0.628688621  |
| 4829 | PJA1     | 64219 | 0.000779777 | -0.507829691 |
| 4830 | TOR3A    | 64222 | 0.0006925   | -0.511910864 |
| 4831 | GBL      | 64223 | 0.009087006 | -0.409370372 |
| 4832 | HERPUD2  | 64224 | 1.24E-05    | -0.6218613   |
| 4833 | ARL6IP2  | 64225 | 4.74E-05    | -0.589812124 |
| 4834 | MS4A5    | 64232 | 0.000148343 | 0.559499028  |
| 4835 | PAPD5    | 64282 | 0.006935655 | -0.422141974 |
| 4836 | NOC3L    | 64318 | 0.006154552 | -0.427399632 |
| 4837 | RNF25    | 64320 | 2.25E-10    | 0.798893292  |
| 4838 | SOX17    | 64321 | 0.008889992 | -0.410456106 |
| 4839 | XPO4     | 64328 | 0.001508365 | 0.48415809   |
| 4840 | ARHGAP9  | 64333 | 0.004819654 | 0.438070059  |
| 4841 | HS1BP3   | 64342 | 0.000528432 | 0.520954201  |
| 4842 | HIF3A    | 64344 | 2.95E-08    | 0.731948319  |
| 4843 | NXN      | 64359 | 0.000686006 | -0.512226246 |
| 4844 | SIL1     | 64374 | 0.005541189 | -0.432018387 |
| 4845 | CDH24    | 64403 | 1.47E-07    | 0.706790965  |
| 4846 | CDH22    | 64405 | 2.16E-08    | 0.736823229  |
| 4847 | C5orf28  | 64417 | 0.001494606 | -0.48450448  |
| 4848 | TMEM168  | 64418 | 0.006674161 | 0.423855005  |
| 4849 | SUSD1    | 64420 | 4.75E-06    | 0.642637422  |
| 4850 | ATG3     | 64422 | 0.00107818  | -0.496313212 |
| 4851 | MRPS25   | 64432 | 0.000154656 | -0.558326428 |
| 4852 | C7orf4   | 64433 | 1.02E-10    | 0.809561768  |
| 4853 | NOM1     | 64434 | 0.002489494 | -0.465243065 |
| 4854 | CPEB1    | 64506 | 2.48E-05    | 0.605748577  |

|      |          |       |             |              |
|------|----------|-------|-------------|--------------|
| 4855 | NDST4    | 64579 | 0.001016508 | 0.498459335  |
| 4856 | CLEC7A   | 64581 | 1.10E-05    | 0.624480275  |
| 4857 | RBMY3AP  | 64593 | 4.03E-08    | 0.727197686  |
| 4858 | PERQ1    | 64599 | 1.51E-10    | 0.804402854  |
| 4859 | PLA2G2F  | 64600 | 2.23E-05    | 0.608360798  |
| 4860 | VPS16    | 64601 | 0.001749379 | -0.478592959 |
| 4861 | HIAT1    | 64645 | 0.006141764 | -0.427504078 |
| 4862 | SPANXC   | 64663 | 0.000366059 | 0.53266598   |
| 4863 | ANAPC1   | 64682 | 0.002448386 | 0.465900453  |
| 4864 | GORASP1  | 64689 | 0.000713987 | -0.510855398 |
| 4865 | CTAGE1   | 64693 | 0.002167431 | 0.470524152  |
| 4866 | COPS7B   | 64708 | 0.000440843 | 0.526821668  |
| 4867 | NUCKS1   | 64710 | 0.003310534 | -0.453805779 |
| 4868 | HS3ST6   | 64711 | 0.009045521 | -0.409594479 |
| 4869 | UNKL     | 64718 | 0.000933373 | -0.501479987 |
| 4870 | WDR13    | 64743 | 0.000936683 | -0.501356253 |
| 4871 | METT11D1 | 64745 | 0.001391513 | -0.487182646 |
| 4872 | ACBD3    | 64746 | 0.00152402  | -0.483785668 |
| 4873 | MFSD1    | 64747 | 1.37E-05    | 0.61964805   |
| 4874 | SMURF2   | 64750 | 7.85E-05    | -0.576898297 |
| 4875 | CCDC136  | 64753 | 1.30E-10    | 0.806231966  |
| 4876 | C16orf58 | 64755 | 0.00025311  | -0.544029635 |
| 4877 | MOSC1    | 64757 | 0.007758978 | -0.416918742 |
| 4878 | TNS3     | 64759 | 0.009109144 | -0.409242938 |
| 4879 | PARP12   | 64761 | 0.003806315 | -0.448039696 |
| 4880 | CREB3L2  | 64764 | 0.00370084  | -0.449187834 |
| 4881 | S100PBP  | 64766 | 0.005307841 | -0.433900953 |
| 4882 | C6orf106 | 64771 | 2.32E-09    | 0.767876458  |
| 4883 | RMND5B   | 64777 | 1.18E-06    | 0.670027994  |
| 4884 | RBM15    | 64783 | 0.001637922 | -0.481113871 |
| 4885 | RABL5    | 64792 | 0.009654801 | -0.406505419 |
| 4886 | CCDC21   | 64793 | 0.007875313 | 0.416246535  |
| 4887 | DDX31    | 64794 | 2.94E-07    | 0.695034182  |
| 4888 | ELOVL1   | 64834 | 0.002458026 | -0.465757673 |
| 4889 | KLC2     | 64837 | 7.26E-09    | 0.752455134  |
| 4890 | PORCN    | 64840 | 0.000111245 | 0.567512738  |
| 4891 | ISL2     | 64843 | 3.10E-07    | 0.694117791  |
| 4892 | 7-Mar    | 64844 | 0.001249329 | -0.491099678 |
| 4893 | SPATA20  | 64847 | 0.002194031 | -0.47007108  |
| 4894 | C1orf80  | 64853 | 0.000549083 | -0.519752994 |
| 4895 | RFXDC2   | 64864 | 0.000950915 | -0.500804629 |
| 4896 | AGXT2    | 64902 | 3.76E-08    | 0.728230182  |
| 4897 | BCL11B   | 64919 | 1.19E-07    | 0.710247133  |
| 4898 | TTC23    | 64927 | 3.89E-07    | 0.690268815  |
| 4899 | CENPH    | 64946 | 2.19E-07    | 0.700102234  |

|      |           |       |             |              |
|------|-----------|-------|-------------|--------------|
| 4900 | MRPS26    | 64949 | 0.000512042 | -0.522024079 |
| 4901 | Unknown   | 64951 | 3.02E-05    | -0.601022492 |
| 4902 | MRPS9     | 64965 | 0.004071617 | -0.445169769 |
| 4903 | MRPS6     | 64968 | 2.83E-05    | -0.602584834 |
| 4904 | MRPL38    | 64978 | 8.78E-08    | 0.715035007  |
| 4905 | MRPL36    | 64979 | 0.004135084 | -0.444547769 |
| 4906 | MRPL34    | 64981 | 0.008948965 | -0.410121627 |
| 4907 | MRPL32    | 64983 | 1.96E-05    | -0.611352084 |
| 4908 | MRPL9     | 65005 | 0.001049717 | -0.497277543 |
| 4909 | MRPL1     | 65008 | 0.00528529  | -0.434095003 |
| 4910 | NDRG4     | 65009 | 0.000361914 | 0.533017919  |
| 4911 | GPBP1     | 65056 | 0.000522378 | -0.52135872  |
| 4912 | PFTK2     | 65061 | 1.35E-11    | 0.842289499  |
| 4913 | NBEAL1    | 65065 | 0.005245225 | -0.434423154 |
| 4914 | ALS2CR10  | 65072 | 0.00761608  | 0.417769765  |
| 4915 | RTN4R     | 65078 | 0.001370414 | 0.487761051  |
| 4916 | NOL6      | 65083 | 8.08E-05    | 0.576091888  |
| 4917 | TMEM135   | 65084 | 0.003905164 | -0.446901223 |
| 4918 | UPF3A     | 65110 | 0.00028041  | -0.540972897 |
| 4919 | RSRC2     | 65117 | 6.13E-05    | -0.583224346 |
| 4920 | WNK1      | 65125 | 4.54E-08    | 0.725460508  |
| 4921 | NADK      | 65220 | 0.007156028 | -0.420735545 |
| 4922 | SPATS2    | 65244 | 0.003066001 | -0.456964416 |
| 4923 | MPPE1     | 65258 | 0.000494146 | 0.523170574  |
| 4924 | WNK3      | 65267 | 4.15E-11    | 0.822641082  |
| 4925 | BRD9      | 65980 | 0.001672708 | -0.480295739 |
| 4926 | ZSCAN18   | 65982 | 0.00076144  | -0.50871709  |
| 4927 | AACS      | 65985 | 0.000364756 | -0.532775485 |
| 4928 | ZNF747    | 65988 | 3.77E-11    | 0.824257916  |
| 4929 | C20orf116 | 65992 | 0.000160649 | -0.557223686 |
| 4930 | MGC3032   | 65998 | 0.000502422 | -0.522630768 |
| 4931 | LRRC61    | 65999 | 0.001133176 | 0.494589742  |
| 4932 | CYP4F12   | 66002 | 1.23E-06    | 0.66938029   |
| 4933 | SLC2A11   | 66035 | 8.00E-05    | 0.576376234  |
| 4934 | BOLL      | 66037 | 0.002076773 | 0.472158852  |
| 4935 | CRELD1    | 78987 | 0.00833845  | -0.41355245  |
| 4936 | MRP63     | 78988 | 1.48E-05    | -0.617877866 |
| 4937 | OTUB2     | 78990 | 3.56E-09    | 0.762297913  |
| 4938 | PRR14     | 78994 | 2.78E-05    | 0.603037205  |
| 4939 | C1orf135  | 79000 | 3.41E-10    | 0.793277917  |
| 4940 | MIS12     | 79003 | 0.002051874 | -0.472594029 |
| 4941 | CUEDC2    | 79004 | 0.000337914 | 0.535273314  |
| 4942 | DDX50     | 79009 | 0.001665792 | -0.480478599 |
| 4943 | CAMKV     | 79012 | 0.00645137  | 0.42539519   |
| 4944 | DDA1      | 79016 | 3.95E-05    | 0.594433372  |

|      |          |       |             |              |
|------|----------|-------|-------------|--------------|
| 4945 | C17orf39 | 79018 | 0.000123946 | -0.564453248 |
| 4946 | MGC5590  | 79024 | 0.002181476 | 0.470293972  |
| 4947 | PRNPIP   | 79033 | 0.002650175 | -0.462718886 |
| 4948 | C7orf26  | 79034 | 0.000333042 | -0.535721331 |
| 4949 | C19orf50 | 79036 | 0.006975804 | -0.421864769 |
| 4950 | TSEN34   | 79042 | 0.00246426  | -0.465667189 |
| 4951 | SECISBP2 | 79048 | 0.005788873 | -0.430137183 |
| 4952 | NOC4L    | 79050 | 0.006786704 | -0.423118545 |
| 4953 | ALG8     | 79053 | 0.000199121 | -0.551097863 |
| 4954 | PRRG3    | 79057 | 9.11E-06    | 0.628716245  |
| 4955 | ASPSR1   | 79058 | 2.20E-05    | -0.608652789 |
| 4956 | MGC3196  | 79064 | 0.003847921 | -0.447547826 |
| 4957 | ATG9A    | 79065 | 0.00014773  | -0.559628006 |
| 4958 | Unknown  | 79066 | 3.81E-09    | 0.761374558  |
| 4959 | FASTKD3  | 79072 | 0.002239775 | -0.469282703 |
| 4960 | C11orf48 | 79081 | 0.000798649 | -0.507030249 |
| 4961 | WDR77    | 79084 | 1.12E-07    | 0.711144842  |
| 4962 | ZNF426   | 79088 | 0.005855806 | 0.429602579  |
| 4963 | CHAC1    | 79094 | 1.97E-08    | 0.738240084  |
| 4964 | TRIM48   | 79097 | 0.000748573 | 0.509288149  |
| 4965 | MGC4473  | 79100 | 0.000382884 | 0.531302842  |
| 4966 | DHX58    | 79132 | 0.001308557 | -0.489443026 |
| 4967 | C20orf7  | 79133 | 0.009188819 | -0.408845149 |
| 4968 | FAM134A  | 79137 | 1.91E-05    | -0.612025743 |
| 4969 | CHCHD7   | 79145 | 0.000499917 | -0.522801421 |
| 4970 | FKRP     | 79147 | 3.00E-08    | 0.731691194  |
| 4971 | MMP28    | 79148 | 1.28E-06    | 0.668632015  |
| 4972 | MGC4859  | 79150 | 4.37E-05    | 0.59192522   |
| 4973 | C7orf23  | 79161 | 0.004712975 | -0.438996454 |
| 4974 | LILRP2   | 79166 | 5.86E-06    | 0.638261771  |
| 4975 | Unknown  | 79168 | 1.30E-05    | 0.620727996  |
| 4976 | RBM42    | 79171 | 0.007135591 | -0.420871068 |
| 4977 | CENPO    | 79172 | 2.93E-09    | 0.764876964  |
| 4978 | CRELD2   | 79174 | 0.000869694 | -0.504034837 |
| 4979 | ZNF343   | 79175 | 5.46E-08    | 0.722538547  |
| 4980 | FBXL15   | 79176 | 0.00025666  | -0.543588461 |
| 4981 | ZNF576   | 79177 | 0.001794872 | -0.47761407  |
| 4982 | TMEM43   | 79188 | 0.008197438 | -0.414314212 |
| 4983 | ZNF557   | 79230 | 5.29E-09    | 0.756775869  |
| 4984 | MMEL1    | 79258 | 0.000995206 | 0.499224156  |
| 4985 | WDR32    | 79269 | 7.09E-05    | 0.579512903  |
| 4986 | OR51B4   | 79339 | 1.65E-08    | 0.74081304   |
| 4987 | OR51B2   | 79345 | 6.43E-06    | 0.636311087  |
| 4988 | ZXDC     | 79364 | 0.000228784 | -0.54705022  |
| 4989 | BHLHB3   | 79365 | 0.001714066 | -0.479394094 |

|      |           |       |             |              |
|------|-----------|-------|-------------|--------------|
| 4990 | FCRL2     | 79368 | 0.005853615 | 0.429621818  |
| 4991 | BCL2L14   | 79370 | 1.87E-10    | 0.801340334  |
| 4992 | NOX5      | 79400 | 2.04E-08    | 0.737668494  |
| 4993 | GLB1L     | 79411 | 5.28E-09    | 0.756837746  |
| 4994 | WDR25     | 79446 | 0.004424596 | -0.441645918 |
| 4995 | ULBP3     | 79465 | 3.40E-06    | 0.649492586  |
| 4996 | FAM65A    | 79567 | 0.000304467 | 0.538443087  |
| 4997 | C2orf47   | 79568 | 9.40E-05    | -0.57209279  |
| 4998 | EPS8L3    | 79574 | 0.000318693 | 0.537081176  |
| 4999 | ABHD8     | 79575 | 0.007135591 | -0.420874948 |
| 5000 | GPR172A   | 79581 | 0.007812909 | -0.416607964 |
| 5001 | CORO7     | 79585 | 4.62E-06    | 0.643246161  |
| 5002 | Unknown   | 79587 | 0.003383442 | -0.45288021  |
| 5003 | MRPL24    | 79590 | 0.000555073 | -0.519372969 |
| 5004 | C1orf166  | 79594 | 0.000135429 | 0.562031446  |
| 5005 | LRRIQ2    | 79598 | 2.41E-10    | 0.797709404  |
| 5006 | ADIPOR2   | 79602 | 0.007580154 | -0.417989265 |
| 5007 | C14orf138 | 79609 | 0.004555962 | -0.440448496 |
| 5008 | CCNJL     | 79616 | 9.59E-10    | 0.779755306  |
| 5009 | HMBOX1    | 79618 | 0.000231959 | 0.546653053  |
| 5010 | C16orf33  | 79622 | 0.007996353 | -0.415538105 |
| 5011 | GALNT14   | 79623 | 4.68E-10    | 0.789024629  |
| 5012 | TNFAIP8L2 | 79626 | 1.57E-09    | 0.77317894   |
| 5013 | SH3TC2    | 79628 | 8.60E-06    | 0.630051195  |
| 5014 | EFTUD1    | 79631 | 0.001990745 | -0.473696338 |
| 5015 | FAT4      | 79633 | 0.000398017 | 0.530092559  |
| 5016 | TMEM53    | 79639 | 0.001469048 | -0.485151125 |
| 5017 | CHMP6     | 79643 | 5.71E-10    | 0.786481373  |
| 5018 | PANK3     | 79646 | 0.000709213 | -0.511093571 |
| 5019 | MCPH1     | 79648 | 2.18E-06    | 0.658436284  |
| 5020 | NARG2     | 79664 | 0.00106671  | -0.496719422 |
| 5021 | DHX40     | 79665 | 3.43E-05    | -0.597916099 |
| 5022 | C3orf52   | 79669 | 0.000288044 | 0.540159055  |
| 5023 | FN3KRP    | 79672 | 0.00757297  | -0.418031187 |
| 5024 | FASTKD1   | 79675 | 0.001751588 | -0.478541172 |
| 5025 | ZDHHC14   | 79683 | 3.06E-10    | 0.794690775  |
| 5026 | ZNF322A   | 79692 | 0.001763033 | -0.478292194 |
| 5027 | ZMAT4     | 79698 | 2.81E-08    | 0.732755358  |
| 5028 | PRKRIP1   | 79706 | 0.008076232 | -0.415046622 |
| 5029 | GLT25D1   | 79709 | 0.000360713 | 0.533152278  |
| 5030 | MORC4     | 79710 | 1.16E-06    | 0.670427105  |
| 5031 | IPO4      | 79711 | 0.003166533 | 0.455618155  |
| 5032 | GTDC1     | 79712 | 0.000205172 | 0.550222157  |
| 5033 | CCDC51    | 79714 | 0.0059645   | -0.428752198 |
| 5034 | NPEPL1    | 79716 | 5.17E-05    | -0.587633314 |



|      |           |       |             |              |
|------|-----------|-------|-------------|--------------|
| 5035 | TBL1XR1   | 79718 | 0.004754449 | -0.438645811 |
| 5036 | ANKRD55   | 79722 | 1.60E-10    | 0.803573259  |
| 5037 | ZNF768    | 79724 | 0.004399172 | -0.441888968 |
| 5038 | LIN28     | 79727 | 5.18E-07    | 0.685190578  |
| 5039 | KCTD17    | 79734 | 0.000308891 | 0.538037556  |
| 5040 | BBS10     | 79738 | 0.00705693  | -0.421343488 |
| 5041 | Unknown   | 79741 | 5.38E-11    | 0.819138659  |
| 5042 | CXorf36   | 79742 | 1.05E-10    | 0.809166836  |
| 5043 | ZNF419    | 79744 | 3.07E-08    | 0.731352652  |
| 5044 | LMAN1L    | 79748 | 0.002417658 | 0.466416716  |
| 5045 | ZNF659    | 79750 | 0.000327568 | 0.53627918   |
| 5046 | SLC25A22  | 79751 | 0.009024064 | -0.409728428 |
| 5047 | DHRS12    | 79758 | 8.43E-07    | 0.67631156   |
| 5048 | ELMO3     | 79767 | 0.005497447 | -0.432328243 |
| 5049 | TXNDC15   | 79770 | 0.00704417  | -0.421428511 |
| 5050 | MCTP1     | 79772 | 0.000133214 | 0.562472736  |
| 5051 | ZFHX4     | 79776 | 0.00939265  | 0.407786076  |
| 5052 | LRRC31    | 79782 | 5.96E-07    | 0.682667086  |
| 5053 | MYH14     | 79784 | 8.43E-07    | 0.676308903  |
| 5054 | ZNF665    | 79788 | 0.001988601 | -0.473759067 |
| 5055 | FBXO31    | 79791 | 0.006387572 | -0.425813431 |
| 5056 | GSDMDC1   | 79792 | 0.007276307 | -0.41992235  |
| 5057 | C12orf49  | 79794 | 1.05E-07    | 0.712176484  |
| 5058 | ZNF408    | 79797 | 0.000177507 | 0.554410148  |
| 5059 | KIAA1822L | 79802 | 1.01E-07    | 0.712785047  |
| 5060 | HPS6      | 79803 | 0.007600706 | -0.417868795 |
| 5061 | GSTCD     | 79807 | 9.75E-05    | 0.57110518   |
| 5062 | SLTM      | 79811 | 4.32E-07    | -0.688378337 |
| 5063 | AGMAT     | 79814 | 1.01E-07    | 0.712880462  |
| 5064 | ARHGAP28  | 79822 | 0.009887456 | 0.405343521  |
| 5065 | C2orf34   | 79823 | 6.11E-05    | 0.583340639  |
| 5066 | CCDC48    | 79825 | 4.39E-09    | 0.759463424  |
| 5067 | ASAM      | 79827 | 1.35E-11    | 0.842494813  |
| 5068 | NAT11     | 79829 | 0.006870837 | -0.42256464  |
| 5069 | QSER1     | 79832 | 2.87E-05    | -0.602213296 |
| 5070 | SGK269    | 79834 | 0.001627043 | -0.481366091 |
| 5071 | ZBTB3     | 79842 | 9.74E-07    | 0.67362712   |
| 5072 | FAM124B   | 79843 | 4.43E-08    | 0.725809676  |
| 5073 | SNX22     | 79856 | 0.006639524 | 0.424103079  |
| 5074 | FLJ13224  | 79857 | 1.45E-08    | 0.742726471  |
| 5075 | NEK11     | 79858 | 7.73E-09    | 0.751537586  |
| 5076 | TUBAL3    | 79861 | 0.000203196 | 0.55051948   |
| 5077 | ZNF669    | 79862 | 0.003546    | 0.450980697  |
| 5078 | C18orf22  | 79863 | 0.007330864 | -0.419572141 |
| 5079 | C11orf63  | 79864 | 0.003657963 | 0.449668194  |

|      |           |       |             |              |
|------|-----------|-------|-------------|--------------|
| 5080 | TREML2    | 79865 | 1.98E-05    | -0.611142468 |
| 5081 | TCTN2     | 79867 | 0.008055489 | -0.41519098  |
| 5082 | FLJ12529  | 79869 | 4.80E-05    | -0.589471251 |
| 5083 | RABEP2    | 79874 | 4.20E-06    | 0.645155742  |
| 5084 | UBA5      | 79876 | 1.09E-07    | 0.711584471  |
| 5085 | ZC3H14    | 79882 | 0.004646654 | -0.439622535 |
| 5086 | HDAC11    | 79885 | 0.009108408 | -0.409251258 |
| 5087 | AYTL2     | 79888 | 0.005666511 | -0.43107177  |
| 5088 | RIN3      | 79890 | 3.01E-06    | 0.651902778  |
| 5089 | ZNF672    | 79894 | 1.36E-06    | 0.667443561  |
| 5090 | ATP8B4    | 79895 | 0.000693518 | 0.511856348  |
| 5091 | FLJ14213  | 79899 | 8.99E-08    | 0.714625969  |
| 5092 | NUP85     | 79902 | 0.000777206 | -0.507944578 |
| 5093 | FLJ14154  | 79903 | 0.002438934 | -0.466052031 |
| 5094 | TMC7      | 79905 | 0.001067914 | 0.496650947  |
| 5095 | MORN1     | 79906 | 2.92E-06    | 0.65256711   |
| 5096 | BTNL8     | 79908 | 1.45E-10    | 0.805011102  |
| 5097 | MAGIX     | 79917 | 4.88E-11    | 0.820787174  |
| 5098 | SETD6     | 79918 | 0.000587849 | -0.517515196 |
| 5099 | C2orf54   | 79919 | 0.000214117 | 0.549009593  |
| 5100 | TCEAL4    | 79921 | 0.001858432 | -0.476297904 |
| 5101 | NANOG     | 79923 | 1.02E-09    | 0.778924975  |
| 5102 | ADM2      | 79924 | 0.002410992 | -0.466525578 |
| 5103 | GRRP1     | 79927 | 2.28E-06    | 0.65742297   |
| 5104 | MAP6D1    | 79929 | 3.08E-10    | 0.794578786  |
| 5105 | KIAA0319L | 79932 | 0.00391213  | -0.446821932 |
| 5106 | SYNPO2L   | 79933 | 0.000550874 | 0.519638221  |
| 5107 | CNTD2     | 79935 | 1.48E-11    | 0.840876041  |
| 5108 | CNTNAP3   | 79937 | 4.17E-10    | 0.790662226  |
| 5109 | SLC35E1   | 79939 | 0.003276948 | -0.454219532 |
| 5110 | ZNF696    | 79943 | 0.001987793 | -0.473783364 |
| 5111 | PDZD7     | 79955 | 9.99E-06    | 0.626686694  |
| 5112 | DENND1C   | 79958 | 4.30E-09    | 0.759729319  |
| 5113 | DENND2D   | 79961 | 0.002986382 | -0.457983362 |
| 5114 | Unknown   | 79963 | 1.22E-10    | 0.807098191  |
| 5115 | C6orf134  | 79969 | 3.78E-08    | 0.728155894  |
| 5116 | ZNF442    | 79973 | 6.19E-11    | 0.816531977  |
| 5117 | CXorf34   | 79979 | 8.04E-06    | 0.631518194  |
| 5118 | DNAJB14   | 79982 | 0.001345656 | -0.488467467 |
| 5119 | SVEP1     | 79987 | 0.000597673 | 0.516939504  |
| 5120 | ANKRD53   | 79998 | 4.45E-07    | 0.687834705  |
| 5121 | KIAA1772  | 80000 | 1.60E-10    | 0.80357228   |
| 5122 | RBM35B    | 80004 | 0.008743394 | 0.411236821  |
| 5123 | TMEM156   | 80008 | 4.70E-07    | 0.686835385  |
| 5124 | PHC3      | 80012 | 0.000113187 | -0.567000866 |

|      |          |       |             |              |
|------|----------|-------|-------------|--------------|
| 5125 | C10orf97 | 80013 | 0.000659152 | -0.513562125 |
| 5126 | C12orf30 | 80018 | 2.71E-06    | 0.65405884   |
| 5127 | UBTD1    | 80019 | 0.001504023 | -0.484266284 |
| 5128 | FOXRED2  | 80020 | 0.000333135 | 0.535707667  |
| 5129 | SLC24A6  | 80024 | 2.20E-07    | 0.699993328  |
| 5130 | PANK2    | 80025 | 1.39E-06    | -0.666959993 |
| 5131 | FBXL18   | 80028 | 6.11E-10    | 0.785594896  |
| 5132 | FAM130A2 | 80034 | 8.17E-07    | 0.676911782  |
| 5133 | TRPM3    | 80036 | 1.03E-06    | 0.672539338  |
| 5134 | Unknown  | 80060 | 0.00537726  | 0.433289197  |
| 5135 | C6orf208 | 80069 | 8.59E-08    | 0.715385904  |
| 5136 | CCDC15   | 80071 | 2.82E-08    | 0.732654587  |
| 5137 | Unknown  | 80078 | 8.45E-08    | 0.715647761  |
| 5138 | Unknown  | 80093 | 0.00591211  | 0.429180547  |
| 5139 | FAM128B  | 80097 | 0.000133977 | -0.562312123 |
| 5140 | Unknown  | 80108 | 1.92E-09    | 0.770387005  |
| 5141 | ZNF614   | 80110 | 6.61E-10    | 0.784663646  |
| 5142 | C3orf36  | 80111 | 0.00131181  | 0.489354244  |
| 5143 | YSK4     | 80122 | 8.45E-10    | 0.781525698  |
| 5144 | ZNF703   | 80139 | 2.10E-05    | 0.6097904    |
| 5145 | PTGES2   | 80142 | 0.001428315 | -0.486190208 |
| 5146 | THOC7    | 80145 | 0.006972112 | -0.421891021 |
| 5147 | UXS1     | 80146 | 0.006617065 | -0.424260149 |
| 5148 | PQLC1    | 80148 | 0.002616336 | -0.463251642 |
| 5149 | CENPT    | 80152 | 0.00410981  | -0.444798931 |
| 5150 | EDC3     | 80153 | 5.04E-11    | 0.82028409   |
| 5151 | CXYorf2  | 80161 | 3.05E-05    | 0.60074472   |
| 5152 | FLJ22184 | 80164 | 9.40E-06    | 0.628048228  |
| 5153 | MOGAT2   | 80168 | 1.20E-10    | 0.807329569  |
| 5154 | C17orf68 | 80169 | 2.95E-11    | 0.827805579  |
| 5155 | TMEM134  | 80194 | 1.83E-06    | -0.661706687 |
| 5156 | OPA3     | 80207 | 9.71E-06    | 0.62730827   |
| 5157 | SPG11    | 80208 | 0.003260961 | -0.454437856 |
| 5158 | C13orf23 | 80209 | 0.00063282  | -0.51495295  |
| 5159 | CCDC92   | 80212 | 0.001164794 | -0.493601116 |
| 5160 | TM2D3    | 80213 | 0.001060719 | -0.496908412 |
| 5161 | PAAF1    | 80227 | 1.09E-09    | 0.77792262   |
| 5162 | RUFY1    | 80230 | 0.000502321 | -0.522642369 |
| 5163 | WDR26    | 80232 | 0.005821253 | 0.429865854  |
| 5164 | PIGZ     | 80235 | 2.38E-07    | 0.698664564  |
| 5165 | KIAA1539 | 80256 | 6.81E-08    | 0.719002491  |
| 5166 | C16orf70 | 80262 | 7.55E-11    | 0.813570903  |
| 5167 | TRIM45   | 80263 | 2.46E-08    | 0.734749774  |
| 5168 | ITPKC    | 80271 | 1.21E-06    | 0.669569743  |
| 5169 | CDK5RAP3 | 80279 | 0.00806224  | -0.415150482 |

|      |          |       |             |              |
|------|----------|-------|-------------|--------------|
| 5170 | MTERFD3  | 80298 | 2.26E-07    | 0.699522423  |
| 5171 | C2orf44  | 80304 | 8.78E-08    | 0.715033672  |
| 5172 | FER1L4   | 80307 | 5.03E-06    | 0.64143193   |
| 5173 | SKIP     | 80309 | 3.65E-08    | 0.728673164  |
| 5174 | LRRC27   | 80313 | 0.000553308 | 0.519481443  |
| 5175 | EPC1     | 80314 | 0.00013064  | -0.56298844  |
| 5176 | PPP1R2P9 | 80316 | 6.93E-05    | 0.580097333  |
| 5177 | ZKSCAN3  | 80317 | 3.33E-10    | 0.793621753  |
| 5178 | GKAP1    | 80318 | 0.002542747 | -0.464378057 |
| 5179 | CXXC4    | 80319 | 7.45E-07    | 0.678560966  |
| 5180 | ULBP1    | 80329 | 1.42E-06    | 0.666618134  |
| 5181 | DNAJC5   | 80331 | 1.92E-05    | -0.611827752 |
| 5182 | WDR82    | 80335 | 1.48E-06    | -0.665849022 |
| 5183 | BPIL1    | 80341 | 1.73E-05    | 0.614282889  |
| 5184 | TRAF3IP3 | 80342 | 1.67E-08    | 0.740636769  |
| 5185 | REEP4    | 80346 | 0.000632477 | -0.514974483 |
| 5186 | COASY    | 80347 | 0.007491313 | -0.418544085 |
| 5187 | TNKS2    | 80351 | 0.008157246 | -0.414553063 |
| 5188 | PDCD1LG2 | 80380 | 2.20E-05    | 0.608719026  |
| 5189 | CD276    | 80381 | 0.000160649 | 0.5572174    |
| 5190 | UBXD1    | 80700 | 0.006087998 | -0.427876848 |
| 5191 | ESX1     | 80712 | 0.000264432 | 0.542726373  |
| 5192 | TTYH3    | 80727 | 0.000119643 | 0.565429911  |
| 5193 | LY6G5C   | 80741 | 0.000173436 | 0.555063398  |
| 5194 | PRR3     | 80742 | 6.92E-06    | 0.634740984  |
| 5195 | TSEN2    | 80746 | 0.000429119 | -0.527675633 |
| 5196 | STARD5   | 80765 | 4.61E-07    | 0.687173966  |
| 5197 | CYB5B    | 80777 | 0.000234164 | 0.546356244  |
| 5198 | COL18A1  | 80781 | 0.009071109 | -0.409445119 |
| 5199 | ASXL3    | 80816 | 9.69E-09    | 0.748363795  |
| 5200 | KIAA1712 | 80817 | 7.31E-05    | -0.578720127 |
| 5201 | ZNF436   | 80818 | 1.47E-05    | 0.618014477  |
| 5202 | KIAA1706 | 80820 | 5.49E-08    | 0.722441624  |
| 5203 | DDHD1    | 80821 | 0.002420338 | 0.466374137  |
| 5204 | TAS1R1   | 80835 | 6.91E-07    | 0.679948807  |
| 5205 | SH3BP5L  | 80851 | 8.13E-11    | 0.812545837  |
| 5206 | HCG4P6   | 80868 | 1.44E-05    | 0.618472092  |
| 5207 | ILKAP    | 80895 | 0.000651511 | -0.513987971 |
| 5208 | TMPRSS5  | 80975 | 0.000224011 | 0.547668054  |
| 5209 | GJA9     | 81025 | 0.009714481 | 0.406212236  |
| 5210 | TUBB1    | 81027 | 3.40E-09    | 0.762892117  |
| 5211 | WNT5B    | 81029 | 0.001070869 | 0.496549525  |
| 5212 | COLEC12  | 81035 | 5.80E-05    | 0.584707391  |
| 5213 | CLPTM1L  | 81037 | 0.000522586 | -0.521334616 |
| 5214 | OR7E104P | 81137 | 0.000262455 | 0.542949518  |

|      |           |       |             |              |
|------|-----------|-------|-------------|--------------|
| 5215 | OR51E2    | 81285 | 6.35E-05    | 0.58234262   |
| 5216 | Unknown   | 81488 | 0.001067914 | 0.496656227  |
| 5217 | PTDSS2    | 81490 | 0.001417951 | -0.486436567 |
| 5218 | CFHR5     | 81494 | 0.000163116 | 0.556789123  |
| 5219 | ITFG1     | 81533 | 0.00163323  | -0.481233494 |
| 5220 | SLC38A1   | 81539 | 0.003280181 | -0.454171947 |
| 5221 | LRRC3     | 81543 | 0.007966593 | 0.415699134  |
| 5222 | TDRD3     | 81550 | 0.000773939 | 0.508102508  |
| 5223 | STMN4     | 81551 | 5.39E-07    | 0.684470433  |
| 5224 | ECOP      | 81552 | 0.004328789 | -0.442593219 |
| 5225 | FAM49A    | 81553 | 0.00067947  | 0.512563335  |
| 5226 | WBSR16    | 81554 | 0.000111145 | -0.56755373  |
| 5227 | YIPF5     | 81555 | 0.000906432 | -0.502589415 |
| 5228 | LMAN2L    | 81562 | 0.001387524 | -0.487298402 |
| 5229 | NDEL1     | 81565 | 0.000218074 | -0.548465994 |
| 5230 | FAM130A1  | 81566 | 5.84E-06    | 0.63833503   |
| 5231 | CLPB      | 81570 | 4.77E-10    | 0.788761734  |
| 5232 | C9orf45   | 81571 | 1.20E-09    | 0.776668844  |
| 5233 | GFOD2     | 81577 | 9.34E-10    | 0.780159695  |
| 5234 | CDADC1    | 81602 | 0.002997626 | -0.457816941 |
| 5235 | TRIM8     | 81603 | 0.000103429 | -0.569553839 |
| 5236 | SNX27     | 81609 | 0.003641287 | 0.449861216  |
| 5237 | TMEM163   | 81615 | 1.17E-06    | 0.670263504  |
| 5238 | ACSBG2    | 81616 | 6.05E-11    | 0.817041008  |
| 5239 | Unknown   | 81619 | 0.001157112 | 0.493844607  |
| 5240 | CDT1      | 81620 | 4.26E-08    | 0.72638956   |
| 5241 | C1orf25   | 81627 | 0.001940476 | -0.474664777 |
| 5242 | TSC22D4   | 81628 | 0.007937302 | -0.415873797 |
| 5243 | TSSK3     | 81629 | 1.58E-08    | 0.741455356  |
| 5244 | MAP1LC3B  | 81631 | 3.61E-08    | 0.728875553  |
| 5245 | C6orf62   | 81688 | 6.40E-05    | -0.582153238 |
| 5246 | ISCA1     | 81689 | 0.002554415 | -0.464207374 |
| 5247 | OR5V1     | 81696 | 0.000657969 | 0.513643536  |
| 5248 | OR2B2     | 81697 | 3.27E-05    | 0.59907159   |
| 5249 | DOCK8     | 81704 | 5.25E-05    | 0.587305332  |
| 5250 | TLR10     | 81793 | 3.98E-05    | 0.594237361  |
| 5251 | OR12D3    | 81797 | 4.36E-10    | 0.789962381  |
| 5252 | NETO1     | 81832 | 3.85E-05    | 0.595037978  |
| 5253 | RNF146    | 81847 | 0.00599227  | -0.428550806 |
| 5254 | ZNF611    | 81856 | 0.0031781   | -0.455448851 |
| 5255 | KRTAP2-1  | 81872 | 9.01E-05    | 0.573229346  |
| 5256 | RAB1B     | 81876 | 7.89E-06    | 0.631953552  |
| 5257 | LAS1L     | 81887 | 0.003248175 | -0.454590425 |
| 5258 | HYI       | 81888 | 0.000808625 | -0.506604791 |
| 5259 | C14orf156 | 81892 | 0.000350256 | -0.534103939 |

|      |              |       |             |              |
|------|--------------|-------|-------------|--------------|
| 5260 | FAM108A1     | 81926 | 0.006244107 | -0.426786976 |
| 5261 | HDHD3        | 81932 | 0.000115687 | -0.566402335 |
| 5262 | FCRL5        | 83416 | 1.76E-08    | 0.739884033  |
| 5263 | FCRL4        | 83417 | 3.30E-10    | 0.793728265  |
| 5264 | ADPGK        | 83440 | 0.008443816 | -0.41288124  |
| 5265 | ZNHIT4       | 83444 | 1.05E-10    | 0.808983417  |
| 5266 | CCDC70       | 83446 | 0.004093139 | 0.444965483  |
| 5267 | SLC25A31     | 83447 | 2.56E-07    | 0.69744497   |
| 5268 | PUS7L        | 83448 | 4.19E-10    | 0.790572971  |
| 5269 | PMFBP1       | 83449 | 2.98E-05    | 0.601332112  |
| 5270 | MXD3         | 83463 | 3.37E-07    | 0.692699037  |
| 5271 | ARHGAP24     | 83478 | 4.25E-10    | 0.790351411  |
| 5272 | SCRT1        | 83482 | 3.85E-07    | 0.690460524  |
| 5273 | DNAL1        | 83544 | 1.30E-11    | 0.843908019  |
| 5274 | RTBDN        | 83546 | 1.13E-11    | 0.852850934  |
| 5275 | RILP         | 83547 | 3.40E-06    | 0.649448526  |
| 5276 | COG3         | 83548 | 0.001172092 | -0.493363256 |
| 5277 | UCK1         | 83549 | 0.007958858 | -0.415752514 |
| 5278 | GPR101       | 83550 | 8.79E-05    | 0.573880286  |
| 5279 | TAAR8        | 83551 | 1.45E-08    | 0.742662286  |
| 5280 | AKR1CL2      | 83592 | 1.30E-11    | 0.846387187  |
| 5281 | Unknown      | 83595 | 0           | 1            |
| 5282 | Unknown      | 83596 | 1.37E-05    | 0.619619114  |
| 5283 | RTP3         | 83597 | 0.001495258 | 0.484485079  |
| 5284 | Unknown      | 83598 | 0.000509193 | 0.522199499  |
| 5285 | CCM2         | 83605 | 0.000559527 | -0.519109695 |
| 5286 | AMMECR1L     | 83607 | 0.000474406 | -0.524518232 |
| 5287 | TEX101       | 83639 | 8.92E-08    | 0.71478542   |
| 5288 | FAM103A1     | 83640 | 1.87E-08    | 0.739030367  |
| 5289 | RP3-402G11.5 | 83642 | 5.40E-07    | 0.684446979  |
| 5290 | Unknown      | 83656 | 0.000118437 | 0.565749607  |
| 5291 | SESN2        | 83667 | 2.35E-05    | 0.60710091   |
| 5292 | CD99L2       | 83692 | 8.84E-10    | 0.781009965  |
| 5293 | CALN1        | 83698 | 5.54E-11    | 0.818616385  |
| 5294 | SH3BGRL2     | 83699 | 3.62E-07    | 0.691552798  |
| 5295 | TRPT1        | 83707 | 0.002565595 | -0.464027408 |
| 5296 | YPEL3        | 83719 | 0.00071062  | -0.51102269  |
| 5297 | RIOK1        | 83732 | 0.007956973 | -0.415766914 |
| 5298 | ITCH         | 83737 | 0.000808775 | 0.506587713  |
| 5299 | TFAP2D       | 83741 | 0.000320952 | 0.536878612  |
| 5300 | L3MBTL2      | 83746 | 8.93E-10    | 0.780862564  |
| 5301 | C20orf57     | 83747 | 5.43E-06    | 0.639856357  |
| 5302 | Unknown      | 83752 | 0.001241208 | -0.491347311 |
| 5303 | KRTAP4-12    | 83755 | 4.53E-10    | 0.789436125  |
| 5304 | FRMD8        | 83786 | 0.000207759 | -0.549877299 |

|      |           |       |             |              |
|------|-----------|-------|-------------|--------------|
| 5305 | ARMC10    | 83787 | 0.003119344 | -0.456250498 |
| 5306 | KCNK16    | 83795 | 0.000218823 | 0.548364435  |
| 5307 | USP26     | 83844 | 7.11E-06    | 0.634162247  |
| 5308 | SYT15     | 83849 | 0.00371721  | 0.449000014  |
| 5309 | FAM62C    | 83850 | 0.000402519 | 0.529722306  |
| 5310 | SYT16     | 83851 | 0.002243879 | 0.46920002   |
| 5311 | SETDB2    | 83852 | 0.009820222 | -0.405671433 |
| 5312 | ANGPTL6   | 83854 | 2.94E-05    | 0.6016203    |
| 5313 | TTY5      | 83863 | 1.78E-11    | 0.837013566  |
| 5314 | TTY11     | 83866 | 1.04E-09    | 0.778564272  |
| 5315 | TTY13     | 83868 | 4.00E-05    | 0.594089478  |
| 5316 | RAB34     | 83871 | 0.000407189 | -0.529355954 |
| 5317 | MRO       | 83876 | 0.000192134 | 0.552135515  |
| 5318 | SLC25A2   | 83884 | 3.59E-05    | 0.596737829  |
| 5319 | PRSS27    | 83886 | 8.39E-08    | 0.715774275  |
| 5320 | WDR87     | 83889 | 1.51E-07    | 0.706386817  |
| 5321 | SPATA9    | 83890 | 5.04E-08    | 0.723764521  |
| 5322 | SPATA16   | 83893 | 0.000866817 | 0.504162572  |
| 5323 | KRTAP1-5  | 83895 | 4.46E-09    | 0.759216091  |
| 5324 | KRTAP3-1  | 83896 | 0.000784074 | 0.507638449  |
| 5325 | KRTAP3-2  | 83897 | 1.92E-09    | 0.770378021  |
| 5326 | KRTAP9-3  | 83900 | 4.45E-07    | 0.687820367  |
| 5327 | KRTAP17-1 | 83902 | 1.23E-07    | 0.709669291  |
| 5328 | GSG2      | 83903 | 1.08E-07    | 0.711762099  |
| 5329 | STK40     | 83931 | 2.75E-05    | 0.603220116  |
| 5330 | EIF2A     | 83939 | 0.009400202 | -0.40774376  |
| 5331 | FCAMR     | 83953 | 1.05E-06    | 0.672327124  |
| 5332 | FKSG83    | 83954 | 1.49E-10    | 0.8046122    |
| 5333 | NACAP1    | 83955 | 4.68E-05    | -0.590111527 |
| 5334 | FKSG43    | 83957 | 1.24E-10    | 0.806858776  |
| 5335 | SPNS1     | 83985 | 0.003888949 | -0.447086262 |
| 5336 | CCDC8     | 83987 | 0.006206795 | -0.427039222 |
| 5337 | CTTNBP2   | 83992 | 0.004048158 | -0.445415381 |
| 5338 | REG4      | 83998 | 0.009796599 | 0.405797649  |
| 5339 | TMPRSS13  | 84000 | 5.54E-10    | 0.786878037  |
| 5340 | GPR98     | 84059 | 7.49E-11    | 0.813690568  |
| 5341 | KIRREL2   | 84063 | 9.84E-10    | 0.779338296  |
| 5342 | HDHD2     | 84064 | 0.001573931 | -0.482554137 |
| 5343 | C1orf49   | 84066 | 2.35E-07    | 0.698922957  |
| 5344 | C12orf25  | 84070 | 2.61E-11    | 0.830389913  |
| 5345 | MYCBPAP   | 84073 | 2.59E-11    | 0.830773784  |
| 5346 | QRICH2    | 84074 | 4.41E-11    | 0.821901473  |
| 5347 | CCDC55    | 84081 | 0.003793032 | -0.448190137 |
| 5348 | USP44     | 84101 | 3.47E-05    | 0.597614184  |
| 5349 | C4orf17   | 84103 | 4.87E-10    | 0.788523028  |

|      |              |       |             |              |
|------|--------------|-------|-------------|--------------|
| 5350 | Unknown      | 84105 | 0.005168137 | -0.435063476 |
| 5351 | PRAM1        | 84106 | 0.009877676 | -0.405399927 |
| 5352 | Unknown      | 84126 | 0.000553399 | -0.519470805 |
| 5353 | RUNDC2A      | 84127 | 0.002541916 | 0.464394522  |
| 5354 | WDR75        | 84128 | 0.002153243 | -0.470752297 |
| 5355 | TMEM166      | 84141 | 0.002757868 | 0.461080453  |
| 5356 | RNASEH2C     | 84153 | 0.005838565 | -0.429749441 |
| 5357 | KIAA1109     | 84162 | 5.64E-05    | -0.585426958 |
| 5358 | GTF2IRD2     | 84163 | 3.89E-06    | 0.646792801  |
| 5359 | NLRC5        | 84166 | 6.31E-08    | 0.72021822   |
| 5360 | RBED1        | 84173 | 1.48E-10    | 0.804739267  |
| 5361 | SLA2         | 84174 | 3.42E-11    | 0.825890262  |
| 5362 | TMEM164      | 84187 | 1.78E-09    | 0.771416579  |
| 5363 | C12orf26     | 84190 | 8.19E-09    | 0.750682525  |
| 5364 | FAM96A       | 84191 | 0.001198763 | -0.492589137 |
| 5365 | SETD3        | 84193 | 0.000340664 | -0.535023224 |
| 5366 | USP48        | 84196 | 0.004215279 | -0.443783046 |
| 5367 | FLJ23356     | 84197 | 1.57E-11    | 0.839348523  |
| 5368 | TXNDC2       | 84203 | 1.16E-09    | 0.777064191  |
| 5369 | MEX3B        | 84206 | 3.48E-05    | 0.597542672  |
| 5370 | DKFZp434F142 | 84214 | 2.41E-06    | 0.656387356  |
| 5371 | ZNF541       | 84215 | 2.62E-05    | 0.604426939  |
| 5372 | TMEM117      | 84216 | 1.82E-07    | 0.703293125  |
| 5373 | TMEM191A     | 84222 | 0.00815267  | -0.414580182 |
| 5374 | C2orf16      | 84226 | 3.55E-05    | 0.597047121  |
| 5375 | LRR8C        | 84230 | 1.15E-11    | 0.849687289  |
| 5376 | TRAF7        | 84231 | 0.002117424 | -0.471415638 |
| 5377 | MAF1         | 84232 | 0.000413984 | -0.528838552 |
| 5378 | TMEM126A     | 84233 | 0.007928965 | -0.415930265 |
| 5379 | DKFZp547J222 | 84237 | 0.000118947 | 0.5656187    |
| 5380 | ATP13A4      | 84239 | 7.84E-08    | 0.71683089   |
| 5381 | LDLOC1L      | 84247 | 0.00033142  | -0.535902011 |
| 5382 | SGIP1        | 84251 | 1.15E-08    | 0.74590662   |
| 5383 | GARNL3       | 84253 | 0.002377117 | 0.467097455  |
| 5384 | CAMKK1       | 84254 | 0.000299705 | 0.538951217  |
| 5385 | FLYWCH1      | 84256 | 1.48E-11    | 0.841353654  |
| 5386 | DCUN1D5      | 84259 | 0.00309394  | -0.456613773 |
| 5387 | PSMG3        | 84262 | 0.000810845 | -0.506497163 |
| 5388 | ALKBH7       | 84266 | 3.98E-06    | 0.646304649  |
| 5389 | POLDIP3      | 84271 | 4.31E-07    | 0.688391711  |
| 5390 | C4orf14      | 84273 | 0.00042435  | -0.528063734 |
| 5391 | NICN1        | 84276 | 0.000151914 | 0.558857886  |
| 5392 | BTBD10       | 84280 | 0.003854951 | -0.447467109 |
| 5393 | RNF135       | 84282 | 0.00010467  | -0.569238677 |
| 5394 | TMEM79       | 84283 | 0.001045713 | 0.497411047  |



|      |          |       |             |              |
|------|----------|-------|-------------|--------------|
| 5395 | C1orf57  | 84284 | 0.008906827 | -0.410370242 |
| 5396 | EIF1AD   | 84285 | 9.90E-05    | -0.570722997 |
| 5397 | ZDHHC16  | 84287 | 0.000403934 | -0.529613481 |
| 5398 | CAPNS2   | 84290 | 6.12E-11    | 0.81672554   |
| 5399 | GINS4    | 84296 | 1.31E-07    | 0.708686579  |
| 5400 | C6orf125 | 84300 | 0.009287133 | -0.408323899 |
| 5401 | NUDT22   | 84304 | 0.002560241 | -0.464119659 |
| 5402 | NUDT16L1 | 84309 | 0.000864137 | -0.504271742 |
| 5403 | C7orf50  | 84310 | 5.31E-05    | -0.586962646 |
| 5404 | MON1A    | 84315 | 0.005627109 | 0.431388187  |
| 5405 | LSMD1    | 84316 | 0.000518216 | -0.521638235 |
| 5406 | ACBD6    | 84320 | 0.000399733 | 0.529955963  |
| 5407 | C18orf12 | 84322 | 0.000183128 | 0.55350818   |
| 5408 | Unknown  | 84324 | 0.001292936 | -0.489879681 |
| 5409 | HVCN1    | 84329 | 0.000536158 | 0.520495079  |
| 5410 | ZNF414   | 84330 | 5.49E-05    | 0.58614681   |
| 5411 | C16orf14 | 84331 | 0.003843997 | -0.447594663 |
| 5412 | AKT1S1   | 84335 | 5.56E-09    | 0.756104215  |
| 5413 | ELOF1    | 84337 | 0.002618299 | -0.463215395 |
| 5414 | ZNF289   | 84364 | 0.005290391 | -0.434043612 |
| 5415 | GPR123   | 84435 | 2.54E-10    | 0.7971215    |
| 5416 | ZNF528   | 84436 | 1.85E-05    | 0.612701529  |
| 5417 | KIAA1822 | 84439 | 7.87E-10    | 0.782421565  |
| 5418 | MAML2    | 84441 | 0.005326463 | -0.433724256 |
| 5419 | FRMPD3   | 84443 | 9.30E-07    | 0.674495878  |
| 5420 | DOT1L    | 84444 | 3.96E-11    | 0.823676515  |
| 5421 | SYVN1    | 84447 | 0.001088258 | -0.495994568 |
| 5422 | ABLIM2   | 84448 | 8.72E-09    | 0.749821463  |
| 5423 | ZNF333   | 84449 | 8.75E-08    | 0.715110298  |
| 5424 | PHYHIPL  | 84457 | 0.006742954 | 0.423406933  |
| 5425 | LCOR     | 84458 | 0.001994833 | -0.473618137 |
| 5426 | KIAA1787 | 84461 | 8.32E-09    | 0.750485605  |
| 5427 | BTBD12   | 84464 | 0.001456118 | 0.485508859  |
| 5428 | MEGF11   | 84465 | 1.50E-05    | 0.617599265  |
| 5429 | JPH4     | 84502 | 6.60E-09    | 0.753744314  |
| 5430 | DCTN5    | 84516 | 2.78E-08    | 0.732906297  |
| 5431 | ARPM1    | 84517 | 2.60E-05    | 0.604606648  |
| 5432 | Unknown  | 84519 | 0.004268046 | 0.443191797  |
| 5433 | JAGN1    | 84522 | 4.75E-05    | -0.5897671   |
| 5434 | C15orf41 | 84529 | 0.009386015 | -0.407829605 |
| 5435 | KIAA1853 | 84530 | 3.99E-10    | 0.79119803   |
| 5436 | C21orf67 | 84536 | 0.003691019 | 0.449302954  |
| 5437 | MRPL43   | 84545 | 0.001372157 | -0.487704328 |
| 5438 | COL25A1  | 84570 | 5.08E-05    | 0.588080363  |
| 5439 | GNPTG    | 84572 | 0.000901784 | -0.502806835 |

|      |          |       |             |              |
|------|----------|-------|-------------|--------------|
| 5440 | PARD6B   | 84612 | 0.006165277 | -0.427323586 |
| 5441 | ZBTB37   | 84614 | 6.75E-08    | 0.719153118  |
| 5442 | ZGPAT    | 84619 | 0.000507417 | -0.522310024 |
| 5443 | KRBA1    | 84626 | 8.61E-07    | 0.675908906  |
| 5444 | KIAA1856 | 84629 | 0.00045143  | 0.526091726  |
| 5445 | TTBK1    | 84630 | 2.56E-05    | 0.60499019   |
| 5446 | LCE3D    | 84648 | 4.02E-05    | 0.59397213   |
| 5447 | EBPL     | 84650 | 7.26E-05    | -0.578894008 |
| 5448 | SPZ1     | 84654 | 1.16E-07    | 0.710600685  |
| 5449 | DPY30    | 84661 | 0.001509171 | -0.484135564 |
| 5450 | USP32    | 84669 | 0.004576881 | -0.440240194 |
| 5451 | TTY6     | 84672 | 0.002089115 | 0.471925347  |
| 5452 | SLC9A7   | 84679 | 1.94E-07    | 0.702202549  |
| 5453 | HINT2    | 84681 | 8.70E-07    | 0.6757207    |
| 5454 | INSM2    | 84684 | 2.24E-06    | 0.657822792  |
| 5455 | MCEE     | 84693 | 0.004944042 | -0.43695949  |
| 5456 | GJA10    | 84694 | 5.56E-11    | 0.818475071  |
| 5457 | Unknown  | 84695 | 4.26E-08    | 0.726368839  |
| 5458 | ABHD1    | 84696 | 3.96E-11    | 0.823617058  |
| 5459 | CREB3L3  | 84699 | 1.95E-09    | 0.770179698  |
| 5460 | HDGF2    | 84717 | 0.004647598 | -0.439609875 |
| 5461 | PIGO     | 84720 | 5.99E-11    | 0.817385241  |
| 5462 | KIAA0515 | 84726 | 0.002276472 | -0.468638628 |
| 5463 | CNDP1    | 84735 | 5.28E-05    | 0.587149137  |
| 5464 | MGC10981 | 84740 | 2.06E-06    | 0.659479581  |
| 5465 | FUT10    | 84750 | 1.73E-10    | 0.802251681  |
| 5466 | MGC4655  | 84752 | 0.00214038  | -0.471005058 |
| 5467 | EFCAB4B  | 84766 | 2.40E-09    | 0.767460421  |
| 5468 | ZNF607   | 84775 | 0.005685966 | -0.430906201 |
| 5469 | ARD1B    | 84779 | 6.35E-11    | 0.816119913  |
| 5470 | MGC2889  | 84789 | 2.91E-05    | 0.601916817  |
| 5471 | MGC12966 | 84792 | 0.008070581 | -0.415084293 |
| 5472 | MGC12982 | 84793 | 0.001081133 | 0.496212555  |
| 5473 | C19orf48 | 84798 | 0.003667694 | -0.449553199 |
| 5474 | TA-NFKBH | 84807 | 1.80E-07    | 0.703441897  |
| 5475 | PLCD4    | 84812 | 4.13E-09    | 0.760239677  |
| 5476 | PPAPDC3  | 84814 | 6.88E-07    | 0.680037615  |
| 5477 | MGC12916 | 84815 | 0.000114978 | 0.566572006  |
| 5478 | IL17RC   | 84818 | 6.84E-07    | 0.68013641   |
| 5479 | FCRLA    | 84824 | 8.62E-11    | 0.811722511  |
| 5480 | SFT2D3   | 84826 | 4.62E-05    | 0.590464459  |
| 5481 | USMG5    | 84833 | 0.000361914 | -0.533026343 |
| 5482 | MGC15705 | 84843 | 0.000873429 | 0.503883806  |
| 5483 | PHF5A    | 84844 | 0.009487732 | -0.407319234 |
| 5484 | MGC16075 | 84847 | 8.65E-06    | 0.629934489  |

|      |          |       |             |              |
|------|----------|-------|-------------|--------------|
| 5485 | C9orf70  | 84850 | 5.63E-05    | 0.585514291  |
| 5486 | MGC16291 | 84856 | 0.000961207 | 0.500428387  |
| 5487 | MINA     | 84864 | 0.001935057 | -0.474761621 |
| 5488 | PTPN5    | 84867 | 3.55E-07    | 0.691856319  |
| 5489 | CBR4     | 84869 | 0.000138708 | -0.5613791   |
| 5490 | AGBL4    | 84871 | 3.79E-09    | 0.76144274   |
| 5491 | ZC3H10   | 84872 | 0.008497349 | -0.412568561 |
| 5492 | MFSD2    | 84879 | 0.000362528 | 0.532960825  |
| 5493 | RPUSD4   | 84881 | 0.000715303 | -0.510778146 |
| 5494 | ZSCAN10  | 84891 | 3.24E-06    | 0.650446303  |
| 5495 | C3orf39  | 84892 | 0.002973268 | -0.458145351 |
| 5496 | FBXO18   | 84893 | 1.86E-09    | 0.770848994  |
| 5497 | TMTC4    | 84899 | 0.000109044 | -0.568089316 |
| 5498 | NFATC2IP | 84901 | 0.00916935  | -0.40893985  |
| 5499 | CCDC123  | 84902 | 1.56E-08    | 0.741673695  |
| 5500 | C9orf100 | 84904 | 3.75E-11    | 0.824552308  |
| 5501 | ZNF341   | 84905 | 0.004268863 | -0.443177959 |
| 5502 | FAM136A  | 84908 | 2.86E-05    | -0.602312039 |
| 5503 | TMEM87B  | 84910 | 0.000569538 | -0.51852085  |
| 5504 | SLC35B4  | 84912 | 0.000316353 | 0.537322347  |
| 5505 | FIZ1     | 84922 | 5.10E-08    | 0.723589492  |
| 5506 | FAM104A  | 84923 | 0.004237526 | -0.443542279 |
| 5507 | C12orf52 | 84934 | 7.92E-08    | 0.716660554  |
| 5508 | ZFYVE19  | 84936 | 0.00694848  | -0.422040019 |
| 5509 | CORO6    | 84940 | 3.49E-05    | 0.597521501  |
| 5510 | HSH2D    | 84941 | 2.38E-10    | 0.797905906  |
| 5511 | WDR73    | 84942 | 0.008130463 | -0.414712702 |
| 5512 | MAEL     | 84944 | 7.11E-06    | 0.634158791  |
| 5513 | PRPF38A  | 84950 | 1.51E-07    | 0.706389122  |
| 5514 | TNS4     | 84951 | 4.50E-10    | 0.78957904   |
| 5515 | FBXL20   | 84961 | 0.000737644 | -0.509766532 |
| 5516 | IGSF21   | 84966 | 1.24E-08    | 0.744965346  |
| 5517 | C1orf94  | 84970 | 3.71E-08    | 0.728454767  |
| 5518 | SNHG7    | 84973 | 0.009531316 | -0.407108019 |
| 5519 | C12orf62 | 84987 | 0.00057972  | -0.517955242 |
| 5520 | RBM17    | 84991 | 5.15E-05    | -0.587731079 |
| 5521 | PIGY     | 84992 | 0.00019373  | -0.551878743 |
| 5522 | MGC16275 | 85001 | 0.004707585 | 0.439069764  |
| 5523 | FAM86B1  | 85002 | 1.26E-09    | 0.775994946  |
| 5524 | MGC2848  | 85003 | 0.00016705  | 0.556141085  |
| 5525 | RERG     | 85004 | 0.008033733 | 0.415319847  |
| 5526 | TMEM128  | 85013 | 0.000204344 | -0.550355386 |
| 5527 | REPS1    | 85021 | 0.001618544 | -0.481555889 |
| 5528 | TMEM60   | 85025 | 0.004660596 | -0.439503135 |
| 5529 | C1orf79  | 85028 | 0.00486863  | -0.437637602 |

|      |               |       |             |              |
|------|---------------|-------|-------------|--------------|
| 5530 | KRTAP9-4      | 85280 | 5.57E-11    | 0.818411066  |
| 5531 | KRTAP4-5      | 85289 | 1.06E-08    | 0.74707327   |
| 5532 | KRTAP4-3      | 85290 | 5.94E-06    | 0.637952227  |
| 5533 | KRTAP4-2      | 85291 | 1.46E-08    | 0.7425684    |
| 5534 | ABCC11        | 85320 | 4.02E-06    | 0.6461085    |
| 5535 | SYDE1         | 85360 | 9.07E-10    | 0.780614084  |
| 5536 | TRIM5         | 85363 | 0.005613848 | -0.431496991 |
| 5537 | ALG2          | 85365 | 0.001188925 | -0.492887469 |
| 5538 | Unknown       | 85367 | 2.42E-05    | 0.606318822  |
| 5539 | KIAA1654      | 85368 | 1.36E-05    | 0.619732579  |
| 5540 | FAM40A        | 85369 | 5.36E-09    | 0.756606036  |
| 5541 | KIAA1659      | 85373 | 1.51E-07    | 0.706331092  |
| 5542 | CTA-221G9.4   | 85379 | 0.003171322 | -0.455544298 |
| 5543 | RGS8          | 85397 | 2.07E-10    | 0.799906746  |
| 5544 | SLC22A16      | 85413 | 2.07E-10    | 0.799885588  |
| 5545 | ZIC5          | 85416 | 0.004013436 | 0.445800252  |
| 5546 | CCNB3         | 85417 | 0.008498291 | 0.412553944  |
| 5547 | ZCRB1         | 85437 | 0.000986334 | -0.499544228 |
| 5548 | C4orf35       | 85438 | 0.003150183 | 0.455845756  |
| 5549 | PRIC285       | 85441 | 0.003694075 | -0.449263075 |
| 5550 | CNTNAP4       | 85445 | 5.56E-08    | 0.722259964  |
| 5551 | ZFHX2         | 85446 | 2.84E-05    | 0.602437998  |
| 5552 | RP5-1054A22.3 | 85449 | 4.22E-08    | 0.726530372  |
| 5553 | UNK           | 85451 | 0.000310306 | 0.537902574  |
| 5554 | KIAA1751      | 85452 | 4.15E-06    | 0.645436506  |
| 5555 | DISP2         | 85455 | 1.74E-09    | 0.77174712   |
| 5556 | KIAA1737      | 85457 | 0.009519681 | -0.407177309 |
| 5557 | TANC1         | 85461 | 0.006378951 | -0.42588021  |
| 5558 | SSH2          | 85464 | 1.18E-07    | 0.710298511  |
| 5559 | DNAJC5B       | 85479 | 2.16E-06    | 0.658558241  |
| 5560 | GALP          | 85569 | 0.000223923 | 0.5476906    |
| 5561 | ANKRD13A      | 88455 | 0.008568114 | -0.412175009 |
| 5562 | TRIM4         | 89122 | 2.88E-08    | 0.732309983  |
| 5563 | SERPINB12     | 89777 | 0.001492806 | 0.484548242  |
| 5564 | SERPINB11     | 89778 | 6.53E-06    | 0.635986267  |
| 5565 | HPS4          | 89781 | 0.000399007 | -0.530012095 |
| 5566 | GAL3ST3       | 89792 | 2.95E-07    | 0.694989789  |
| 5567 | PPP1R3F       | 89801 | 0.000119293 | 0.565534723  |
| 5568 | ABCC10        | 89845 | 0.009769763 | -0.405923184 |
| 5569 | FAM125B       | 89853 | 2.93E-10    | 0.795195505  |
| 5570 | SEC16B        | 89866 | 7.97E-05    | 0.576506451  |
| 5571 | TRIM15        | 89870 | 6.83E-06    | 0.635027355  |
| 5572 | OR6W1P        | 89883 | 0.002692224 | 0.462060339  |
| 5573 | LHX4          | 89884 | 0.000242191 | 0.545383104  |
| 5574 | FATE1         | 89885 | 8.45E-08    | 0.71564108   |

|      |            |       |             |              |
|------|------------|-------|-------------|--------------|
| 5575 | SLAMF9     | 89886 | 1.40E-08    | 0.743282176  |
| 5576 | WDR34      | 89891 | 0.003538973 | -0.451066378 |
| 5577 | TMEM116    | 89894 | 0.005772776 | -0.430270394 |
| 5578 | UBE3B      | 89910 | 0.00042745  | -0.527801796 |
| 5579 | RHOT2      | 89941 | 0.001133574 | -0.494573281 |
| 5580 | KIR3DX1    | 90011 | 2.41E-10    | 0.797723922  |
| 5581 | LACRT      | 90070 | 1.86E-08    | 0.739112255  |
| 5582 | LOC90113   | 90113 | 0.00018978  | 0.552494763  |
| 5583 | TSR2       | 90121 | 0.004754449 | -0.438649812 |
| 5584 | BTBD6      | 90135 | 0.000471106 | -0.524758306 |
| 5585 | TSPAN18    | 90139 | 8.19E-11    | 0.812334447  |
| 5586 | C14orf143  | 90141 | 3.31E-08    | 0.730176213  |
| 5587 | FRMD7      | 90167 | 0.004418758 | 0.441707531  |
| 5588 | EMILIN3    | 90187 | 0.001003425 | 0.4989278    |
| 5589 | KIAA2013   | 90231 | 0.00297962  | -0.458066644 |
| 5590 | ZNF551     | 90233 | 2.46E-09    | 0.767133155  |
| 5591 | C10orf75   | 90271 | 0.000409408 | -0.52918175  |
| 5592 | C3orf25    | 90288 | 0.001225341 | 0.491819778  |
| 5593 | KLHL13     | 90293 | 9.00E-06    | 0.628979533  |
| 5594 | CCDC97     | 90324 | 0.002388601 | -0.46688159  |
| 5595 | ZNF160     | 90338 | 0.00236498  | -0.467295892 |
| 5596 | LOC90379   | 90379 | 7.85E-09    | 0.751299893  |
| 5597 | C15orf42   | 90381 | 6.59E-11    | 0.815278008  |
| 5598 | IFT20      | 90410 | 0.003101252 | -0.456505312 |
| 5599 | MCFD2      | 90411 | 0.002125234 | -0.471272423 |
| 5600 | C15orf23   | 90417 | 1.19E-09    | 0.776813735  |
| 5601 | BMF        | 90427 | 0.002635542 | -0.462933533 |
| 5602 | ZNF622     | 90441 | 0.001463188 | -0.48529989  |
| 5603 | GADD45GIP1 | 90480 | 0.003749228 | -0.448665021 |
| 5604 | LOC90499   | 90499 | 0.000228622 | 0.54708721   |
| 5605 | C6orf142   | 90523 | 2.55E-11    | 0.831139639  |
| 5606 | SHF        | 90525 | 4.90E-07    | 0.686116013  |
| 5607 | DUOXA1     | 90527 | 3.74E-07    | 0.690982638  |
| 5608 | C19orf52   | 90580 | 0.008549367 | -0.412287012 |
| 5609 | C21orf105  | 90625 | 2.14E-08    | 0.736967952  |
| 5610 | C6orf176   | 90632 | 0.004026126 | 0.445666423  |
| 5611 | COX19      | 90639 | 2.27E-06    | 0.657552666  |
| 5612 | TGIF2LY    | 90655 | 9.00E-05    | 0.573248882  |
| 5613 | C14orf121  | 90668 | 0.003518882 | -0.451308924 |
| 5614 | CCDC126    | 90693 | 0.000439499 | 0.526927621  |
| 5615 | FAM104B    | 90736 | 0.000695659 | -0.511760623 |
| 5616 | MGC45800   | 90768 | 0.000188904 | 0.552625944  |
| 5617 | ZNF479     | 90827 | 1.01E-07    | 0.712841988  |
| 5618 | ZNF598     | 90850 | 2.71E-05    | 0.60363382   |
| 5619 | HN1L       | 90861 | 0.00122358  | -0.491875669 |

|      |              |       |             |              |
|------|--------------|-------|-------------|--------------|
| 5620 | C9orf123     | 90871 | 0.000215172 | -0.548856815 |
| 5621 | ESAM         | 90952 | 5.62E-11    | 0.818249048  |
| 5622 | ADCK2        | 90956 | 6.05E-08    | 0.720886985  |
| 5623 | ZNF251       | 90987 | 0.001239663 | -0.491402905 |
| 5624 | CREB3L1      | 90993 | 1.75E-07    | 0.703957503  |
| 5625 | FMNL3        | 91010 | 0.000119552 | 0.565468793  |
| 5626 | LASS5        | 91012 | 0.002684817 | -0.462218923 |
| 5627 | DPP9         | 91039 | 1.13E-09    | 0.77747537   |
| 5628 | DKFZp761B107 | 91050 | 3.20E-05    | 0.599660807  |
| 5629 | ANKRD30A     | 91074 | 0.001327432 | 0.4889561    |
| 5630 | LOC91149     | 91149 | 2.52E-10    | 0.797203609  |
| 5631 | NUP210L      | 91181 | 0.002684906 | 0.462212369  |
| 5632 | SLC39A13     | 91252 | 0.005056065 | -0.436011647 |
| 5633 | FAM44B       | 91272 | 0.00028189  | -0.540798131 |
| 5634 | CDKN2AIPNL   | 91368 | 6.91E-06    | 0.634782371  |
| 5635 | ANKRD40      | 91369 | 0.002284048 | -0.468517138 |
| 5636 | XRCC6BP1     | 91419 | 0.004989655 | -0.436559868 |
| 5637 | ACBD5        | 91452 | 0.003900924 | -0.446955775 |
| 5638 | ISX          | 91464 | 0.000688399 | 0.512119007  |
| 5639 | UBXD5        | 91544 | 5.86E-08    | 0.721451378  |
| 5640 | RPS19BP1     | 91582 | 0.00811112  | -0.414840217 |
| 5641 | CCDC16       | 91603 | 1.07E-08    | 0.746935144  |
| 5642 | IDI2         | 91734 | 0.000898207 | 0.502948991  |
| 5643 | YTHDC1       | 91746 | 2.13E-06    | -0.658851445 |
| 5644 | ZNF804A      | 91752 | 5.21E-10    | 0.787665238  |
| 5645 | NEK9         | 91754 | 0.000864137 | -0.504266536 |
| 5646 | CABLES1      | 91768 | 2.61E-05    | 0.60457432   |
| 5647 | FAM55C       | 91775 | 7.11E-11    | 0.814395867  |
| 5648 | WDR20        | 91833 | 0.002855054 | -0.459751601 |
| 5649 | RFT1         | 91869 | 0.000295396 | -0.539406183 |
| 5650 | TIMD4        | 91937 | 1.29E-06    | 0.668447509  |
| 5651 | LOC91948     | 91948 | 0.000109238 | 0.568039774  |
| 5652 | COG7         | 91949 | 0.005254363 | -0.434337914 |
| 5653 | MYOZ3        | 91977 | 1.20E-09    | 0.776625513  |
| 5654 | FAM58A       | 92002 | 0.002970833 | -0.458178889 |
| 5655 | MGC21675     | 92070 | 9.14E-11    | 0.810977445  |
| 5656 | ZC3HAV1L     | 92092 | 0.000233702 | -0.546414069 |
| 5657 | OXNAD1       | 92106 | 5.42E-11    | 0.818964278  |
| 5658 | MTDH         | 92140 | 0.000220102 | -0.548188164 |
| 5659 | ABBA-1       | 92154 | 2.50E-09    | 0.766826078  |
| 5660 | MTG1         | 92170 | 1.83E-07    | 0.703193244  |
| 5661 | UBTD2        | 92181 | 0.000266432 | -0.542477743 |
| 5662 | RCS1         | 92241 | 7.85E-05    | 0.576902195  |
| 5663 | ZNF461       | 92283 | 1.66E-06    | 0.663545831  |
| 5664 | ZNF585B      | 92285 | 1.57E-10    | 0.803840932  |

|      |          |       |             |              |
|------|----------|-------|-------------|--------------|
| 5665 | LYK5     | 92335 | 3.27E-08    | 0.730378168  |
| 5666 | C1orf156 | 92342 | 0.009599156 | -0.406788168 |
| 5667 | LOC92345 | 92345 | 0.006841496 | -0.422769831 |
| 5668 | C1orf105 | 92346 | 2.60E-07    | 0.697175108  |
| 5669 | LOC92482 | 92482 | 0.001267881 | -0.490556853 |
| 5670 | LDHAL6B  | 92483 | 3.27E-08    | 0.730350012  |
| 5671 | ATXN3L   | 92552 | 6.37E-07    | 0.681477762  |
| 5672 | G6PC3    | 92579 | 1.50E-07    | 0.706426237  |
| 5673 | ASB16    | 92591 | 8.86E-06    | 0.629363784  |
| 5674 | MOBK1A   | 92597 | 0.002175522 | -0.470389914 |
| 5675 | TMEM169  | 92691 | 1.84E-10    | 0.801541924  |
| 5676 | TMEM183A | 92703 | 8.32E-11    | 0.812064708  |
| 5677 | WDR85    | 92715 | 0.008701804 | -0.411450964 |
| 5678 | HELB     | 92797 | 0.002059661 | 0.472463998  |
| 5679 | MGC16385 | 92806 | 7.66E-06    | 0.632587409  |
| 5680 | HIST3H2A | 92815 | 0.002005927 | -0.473425369 |
| 5681 | IMP4     | 92856 | 0.004876083 | -0.437565892 |
| 5682 | HNRPLL   | 92906 | 0.000470617 | -0.524796751 |
| 5683 | NT5C1B   | 93034 | 2.41E-11    | 0.832070631  |
| 5684 | KCNG4    | 93107 | 4.80E-05    | 0.589503057  |
| 5685 | TMEM44   | 93109 | 0.009174765 | -0.40891123  |
| 5686 | ORAI3    | 93129 | 0.006520208 | -0.424919531 |
| 5687 | OLFM2    | 93145 | 0.000471183 | 0.524745149  |
| 5688 | HTR7P    | 93164 | 2.46E-08    | 0.734761987  |
| 5689 | PRDM6    | 93166 | 5.47E-06    | 0.639720307  |
| 5690 | PIGM     | 93183 | 2.91E-08    | 0.73217348   |
| 5691 | IGSF8    | 93185 | 0.000986565 | -0.49952689  |
| 5692 | TMEM10   | 93377 | 2.68E-09    | 0.765943711  |
| 5693 | MYLC2PL  | 93408 | 0.000521394 | 0.521429009  |
| 5694 | ARMC6    | 93436 | 0.002235702 | -0.469348596 |
| 5695 | LOC93444 | 93444 | 2.18E-08    | 0.736646134  |
| 5696 | C14orf32 | 93487 | 0.000757805 | -0.508863691 |
| 5697 | ANUBL1   | 93550 | 5.65E-06    | 0.639012118  |
| 5698 | CACNA2D4 | 93589 | 0.002652169 | 0.462682557  |
| 5699 | MRFAP1   | 93621 | 0.004820187 | -0.438060752 |
| 5700 | MGC16169 | 93627 | 1.65E-06    | 0.6637851    |
| 5701 | MYOCD    | 93649 | 4.55E-07    | 0.687421739  |
| 5702 | ACPT     | 93650 | 8.17E-06    | 0.631166267  |
| 5703 | ST7OT1   | 93653 | 7.91E-09    | 0.751169086  |
| 5704 | CAPZA3   | 93661 | 1.67E-05    | -0.615141036 |
| 5705 | HPYR1    | 93668 | 2.22E-07    | 0.699816726  |
| 5706 | ACTR8    | 93973 | 0.000379962 | -0.531525044 |
| 5707 | ATPIF1   | 93974 | 0.001456744 | -0.485489691 |
| 5708 | CAMK2N2  | 94032 | 0.009911612 | 0.405216066  |
| 5709 | ZNF101   | 94039 | 0.000302691 | 0.538618336  |

|      |           |        |             |              |
|------|-----------|--------|-------------|--------------|
| 5710 | SFXN1     | 94081  | 0.008999574 | -0.4098415   |
| 5711 | ORMDL3    | 94103  | 0.008346152 | -0.413486101 |
| 5712 | C21orf66  | 94104  | 0.005187165 | -0.434921177 |
| 5713 | MGC14327  | 94107  | 0.000327301 | 0.536319549  |
| 5714 | ARHGAP12  | 94134  | 0.000437236 | -0.527113184 |
| 5715 | RP1L1     | 94137  | 6.68E-07    | 0.680592738  |
| 5716 | ABCC12    | 94160  | 0.000207757 | 0.549883697  |
| 5717 | FNIP1     | 96459  | 0.000811188 | -0.506470469 |
| 5718 | MRLC2     | 103910 | 0.000358455 | -0.533390173 |
| 5719 | EGLN3     | 112399 | 0.000392723 | 0.530509312  |
| 5720 | GTF3C6    | 112495 | 0.00397377  | -0.446201992 |
| 5721 | CMTM7     | 112616 | 0.001377542 | -0.487547691 |
| 5722 | STX1B     | 112755 | 0.000375576 | 0.531885456  |
| 5723 | TP53RK    | 112858 | 2.77E-10    | 0.795938263  |
| 5724 | VPS26B    | 112936 | 0.001626025 | -0.481391672 |
| 5725 | Unknown   | 112937 | 2.26E-11    | 0.833213246  |
| 5726 | PLCD3     | 113026 | 1.93E-07    | 0.702245463  |
| 5727 | SAAL1     | 113174 | 2.38E-10    | 0.797953263  |
| 5728 | CASC4     | 113201 | 0.00928476  | -0.408341528 |
| 5729 | LOC113230 | 113230 | 0.000152252 | 0.558795751  |
| 5730 | SLC46A1   | 113235 | 0.004262849 | 0.443255107  |
| 5731 | C12orf57  | 113246 | 0.000631228 | -0.515060955 |
| 5732 | LARP4     | 113251 | 0.008781479 | -0.411049485 |
| 5733 | TMEM106A  | 113277 | 0.001074758 | 0.496427396  |
| 5734 | HEL308    | 113510 | 2.38E-07    | 0.698669332  |
| 5735 | MGC16703  | 113691 | 5.83E-08    | 0.721532841  |
| 5736 | ODF3      | 113746 | 1.12E-09    | 0.777670686  |
| 5737 | PIK3IP1   | 113791 | 2.19E-06    | 0.65828354   |
| 5738 | SLC35A4   | 113829 | 0.004950862 | -0.436884274 |
| 5739 | DTX2      | 113878 | 0.002515454 | -0.46481234  |
| 5740 | ZIM3      | 114026 | 0.001171326 | 0.493400389  |
| 5741 | Unknown   | 114036 | 6.80E-05    | 0.580576798  |
| 5742 | C21orf84  | 114038 | 2.79E-11    | 0.829020388  |
| 5743 | C21orf88  | 114041 | 0.000433108 | 0.527412839  |
| 5744 | C21orf89  | 114042 | 1.46E-06    | 0.666074102  |
| 5745 | MCM3APAS  | 114044 | 0.000343759 | 0.534735199  |
| 5746 | WBSCR22   | 114049 | 0.003582357 | -0.450558213 |
| 5747 | TXNRD3    | 114112 | 8.40E-09    | 0.750330775  |
| 5748 | UCN3      | 114131 | 0.005200553 | 0.434791088  |
| 5749 | SIGLEC11  | 114132 | 0.000908391 | 0.502501684  |
| 5750 | SLC2A13   | 114134 | 1.48E-11    | 0.840732824  |
| 5751 | Unknown   | 114224 | 5.40E-07    | 0.684412371  |
| 5752 | NLRP3     | 114548 | 0.001563029 | 0.482820168  |
| 5753 | SLC22A9   | 114571 | 7.61E-06    | 0.632755171  |
| 5754 | TIRAP     | 114609 | 2.78E-11    | 0.829226257  |



|      |           |        |             |              |
|------|-----------|--------|-------------|--------------|
| 5755 | ERMAP     | 114625 | 0.001810808 | -0.477283649 |
| 5756 | CYGB      | 114757 | 1.21E-05    | 0.62246709   |
| 5757 | COP1      | 114769 | 1.25E-10    | 0.806770264  |
| 5758 | PGLYRP3   | 114771 | 4.71E-08    | 0.724852875  |
| 5759 | BTBD9     | 114781 | 6.91E-08    | 0.718804517  |
| 5760 | CSMD2     | 114784 | 0.000377988 | 0.531691986  |
| 5761 | GPRIN1    | 114787 | 4.60E-09    | 0.758730369  |
| 5762 | CSMD3     | 114788 | 0.008639992 | 0.411773587  |
| 5763 | STK11IP   | 114790 | 0.00038423  | -0.531182434 |
| 5764 | FMNL2     | 114793 | 0.000969792 | -0.500108393 |
| 5765 | SLITRK1   | 114798 | 4.15E-11    | 0.822652396  |
| 5766 | MYSM1     | 114803 | 0.004344269 | -0.442431571 |
| 5767 | RNF157    | 114804 | 1.64E-07    | 0.704981465  |
| 5768 | GALNT13   | 114805 | 0.000427257 | 0.52783237   |
| 5769 | KIAA1920  | 114817 | 7.00E-11    | 0.814592291  |
| 5770 | SMYD4     | 114826 | 2.19E-09    | 0.768612109  |
| 5771 | FHAD1     | 114827 | 5.89E-10    | 0.786023268  |
| 5772 | SLAMF6    | 114836 | 2.33E-07    | 0.699049213  |
| 5773 | OSBPL5    | 114879 | 5.28E-07    | 0.684860479  |
| 5774 | OSBPL7    | 114881 | 1.21E-10    | 0.807200698  |
| 5775 | OSBPL9    | 114883 | 2.18E-06    | -0.658383747 |
| 5776 | C1QTNF1   | 114897 | 0.000122935 | 0.564674318  |
| 5777 | C1QTNF3   | 114899 | 0.002673686 | 0.462376113  |
| 5778 | C1QTNF6   | 114904 | 1.86E-07    | 0.702920729  |
| 5779 | C8orf40   | 114926 | 0.000619276 | -0.515718067 |
| 5780 | PTPMT1    | 114971 | 0.003594246 | -0.450409643 |
| 5781 | C6orf150  | 115004 | 0.008516381 | -0.412459904 |
| 5782 | CCDC124   | 115098 | 0.000915985 | 0.502188624  |
| 5783 | LOC115110 | 115110 | 1.99E-07    | 0.701783527  |
| 5784 | OMA1      | 115209 | 0.003683086 | -0.44938418  |
| 5785 | SLC25A26  | 115286 | 0.003117245 | -0.456279141 |
| 5786 | PCMTD1    | 115294 | 0.003447438 | -0.452112991 |
| 5787 | FCRL1     | 115350 | 1.74E-07    | 0.704093803  |
| 5788 | FCRL3     | 115352 | 4.76E-08    | 0.724692567  |
| 5789 | C7orf30   | 115416 | 3.75E-06    | -0.647519864 |
| 5790 | UHRF2     | 115426 | 0.005718206 | -0.430658657 |
| 5791 | GEFT      | 115557 | 6.96E-06    | 0.634600807  |
| 5792 | TNFRSF13C | 115650 | 2.30E-06    | 0.657297614  |
| 5793 | KIR3DL3   | 115653 | 6.87E-10    | 0.784163715  |
| 5794 | SNX26     | 115703 | 2.37E-05    | 0.606892698  |
| 5795 | C14orf172 | 115708 | 1.37E-06    | 0.667298145  |
| 5796 | RAB3C     | 115827 | 2.48E-09    | 0.766974572  |
| 5797 | MGC20983  | 115948 | 0.000341294 | 0.534960909  |
| 5798 | ZNF653    | 115950 | 0.009045521 | -0.409596003 |
| 5799 | C16orf75  | 116028 | 0.00058542  | 0.517645637  |

|      |           |        |             |              |
|------|-----------|--------|-------------|--------------|
| 5800 | LRRC58    | 116064 | 0.001066753 | -0.496712507 |
| 5801 | SLC22A12  | 116085 | 7.55E-11    | 0.813592802  |
| 5802 | ZMYND19   | 116225 | 0.00469768  | -0.439151659 |
| 5803 | FAM36A    | 116228 | 0.001067801 | -0.496665526 |
| 5804 | MOGAT1    | 116255 | 0.005130426 | 0.435375088  |
| 5805 | ACSM1     | 116285 | 3.76E-10    | 0.791956348  |
| 5806 | PANX3     | 116337 | 2.20E-10    | 0.799176096  |
| 5807 | SLC26A8   | 116369 | 7.24E-10    | 0.783512384  |
| 5808 | LYPD1     | 116372 | 0.003581769 | -0.450574689 |
| 5809 | GRIN3A    | 116443 | 0.000489273 | 0.523526568  |
| 5810 | TOP1MT    | 116447 | 0.005420044 | -0.43295374  |
| 5811 | MIST      | 116449 | 7.08E-08    | 0.718413015  |
| 5812 | C1orf19   | 116461 | 5.86E-06    | 0.638281079  |
| 5813 | MAS1L     | 116511 | 0.000114978 | 0.566573783  |
| 5814 | MRPL54    | 116541 | 0.002385564 | -0.466946028 |
| 5815 | DYSFIP1   | 116729 | 2.13E-06    | 0.65886851   |
| 5816 | CNTROB    | 116840 | 3.99E-07    | 0.689805922  |
| 5817 | C1orf142  | 116841 | 0.003437968 | -0.452219901 |
| 5818 | MED12L    | 116931 | 7.71E-07    | 0.677956273  |
| 5819 | CLRN1OS   | 116933 | 0.001059629 | 0.496960474  |
| 5820 | ART5      | 116969 | 2.29E-10    | 0.798531217  |
| 5821 | CENTG3    | 116988 | 0.000215178 | -0.548844098 |
| 5822 | CATSPER1  | 117144 | 0.000393019 | 0.530478163  |
| 5823 | THEM4     | 117145 | 0.009030704 | 0.409694089  |
| 5824 | SH2D1B    | 117157 | 0.007036604 | 0.421480129  |
| 5825 | DCD       | 117159 | 2.36E-07    | 0.698814158  |
| 5826 | WFIKKN1   | 117166 | 5.96E-08    | 0.721158743  |
| 5827 | RAB3IP    | 117177 | 0.003251984 | 0.454544349  |
| 5828 | SSX2IP    | 117178 | 0.001546962 | 0.483204815  |
| 5829 | MRGPRX2   | 117194 | 2.55E-05    | 0.605059848  |
| 5830 | HRASLS5   | 117245 | 0.004866932 | 0.437655626  |
| 5831 | FTSJ3     | 117246 | 7.11E-06    | 0.634150057  |
| 5832 | SLC16A10  | 117247 | 0.004775955 | 0.438433879  |
| 5833 | DEFB118   | 117285 | 6.72E-08    | 0.719222477  |
| 5834 | CIB3      | 117286 | 0.000115537 | 0.566440373  |
| 5835 | TAGAP     | 117289 | 3.48E-10    | 0.793053846  |
| 5836 | TMC1      | 117531 | 0.00183834  | 0.476713511  |
| 5837 | PARD3B    | 117583 | 3.80E-10    | 0.791820822  |
| 5838 | RFFL      | 117584 | 0.00684775  | 0.422708899  |
| 5839 | ZNF354B   | 117608 | 1.04E-07    | 0.712431992  |
| 5840 | Unknown   | 117852 | 3.82E-11    | 0.824052209  |
| 5841 | C21orf100 | 118421 | 9.14E-09    | 0.749168507  |
| 5842 | UBE2J2    | 118424 | 0.002430462 | -0.466212397 |
| 5843 | LOH12CR1  | 118426 | 2.75E-08    | 0.733035064  |
| 5844 | GPR62     | 118442 | 1.14E-06    | 0.670764443  |

|      |           |        |             |              |
|------|-----------|--------|-------------|--------------|
| 5845 | C10orf90  | 118611 | 5.42E-11    | 0.818967381  |
| 5846 | FAM24A    | 118670 | 0.001171998 | 0.493371394  |
| 5847 | ZNF488    | 118738 | 3.06E-10    | 0.794705145  |
| 5848 | MMP21     | 118856 | 0.000108032 | 0.568348395  |
| 5849 | SFXN2     | 118980 | 0.001671209 | -0.480341148 |
| 5850 | C10orf104 | 119504 | 3.50E-05    | -0.597364269 |
| 5851 | OR5P2     | 120065 | 6.39E-09    | 0.754173889  |
| 5852 | SLC36A4   | 120103 | 2.48E-09    | 0.766971985  |
| 5853 | CASP12    | 120329 | 0.002479434 | 0.465401047  |
| 5854 | Unknown   | 120400 | 0.003143507 | 0.455940678  |
| 5855 | AMICA1    | 120425 | 4.76E-05    | 0.589680099  |
| 5856 | C11orf46  | 120534 | 0.007539911 | -0.418226824 |
| 5857 | CCDC38    | 120935 | 4.62E-08    | 0.725177053  |
| 5858 | C12orf59  | 120939 | 2.39E-05    | 0.606676114  |
| 5859 | C12orf45  | 121053 | 1.30E-11    | 0.843450249  |
| 5860 | TMEM132D  | 121256 | 0.009979638 | 0.404904861  |
| 5861 | SLC15A4   | 121260 | 0.001474151 | -0.485007924 |
| 5862 | RHEBL1    | 121268 | 4.69E-07    | 0.686869909  |
| 5863 | ZNF641    | 121274 | 0.002628414 | 0.46304691   |
| 5864 | TPH2      | 121278 | 0.001443678 | 0.485807858  |
| 5865 | AEBP2     | 121536 | 0.003588211 | -0.450478392 |
| 5866 | FOXN4     | 121643 | 3.39E-09    | 0.762930898  |
| 5867 | C13orf16  | 121793 | 8.55E-07    | 0.676035721  |
| 5868 | RXFP2     | 122042 | 0.000278302 | 0.541200897  |
| 5869 | C13orf26  | 122046 | 7.01E-08    | 0.718576835  |
| 5870 | C13orf28  | 122258 | 3.05E-05    | 0.600755682  |
| 5871 | AK7       | 122481 | 8.16E-11    | 0.812451949  |
| 5872 | C14orf79  | 122616 | 0.00214424  | -0.470918148 |
| 5873 | PLD4      | 122618 | 1.45E-08    | 0.742701535  |
| 5874 | RNASE11   | 122651 | 0.000412723 | 0.528934896  |
| 5875 | TPPP2     | 122664 | 0.000157169 | 0.557870254  |
| 5876 | C14orf148 | 122945 | 0.000570044 | 0.518483615  |
| 5877 | ACOT4     | 122970 | 2.98E-08    | 0.7318011    |
| 5878 | SLC24A4   | 123041 | 0.00266784  | 0.462455761  |
| 5879 | LRRC28    | 123355 | 1.21E-08    | 0.745223256  |
| 5880 | AGBL1     | 123624 | 1.91E-06    | 0.660884998  |
| 5881 | FSD2      | 123722 | 6.89E-06    | 0.634838625  |
| 5882 | C16orf63  | 123811 | 2.31E-05    | -0.607523301 |
| 5883 | C16orf78  | 123970 | 6.96E-07    | 0.679788932  |
| 5884 | CDYL2     | 124359 | 2.14E-07    | 0.700494465  |
| 5885 | ANKS3     | 124401 | 0.009816363 | -0.405701337 |
| 5886 | FAM100A   | 124402 | 2.81E-07    | 0.695816365  |
| 5887 | 12-Sep    | 124404 | 8.83E-09    | 0.749655361  |
| 5888 | ZNF720    | 124411 | 0.000290543 | -0.539885591 |
| 5889 | SLIC1     | 124460 | 4.02E-07    | 0.689652607  |

|      |           |        |             |              |
|------|-----------|--------|-------------|--------------|
| 5890 | LOC124512 | 124512 | 1.82E-05    | -0.613124193 |
| 5891 | HSF5      | 124535 | 3.90E-07    | 0.690209569  |
| 5892 | OR4D2     | 124538 | 3.78E-06    | 0.647383674  |
| 5893 | MSI2      | 124540 | 0.001561805 | 0.482861797  |
| 5894 | MGC15523  | 124565 | 0.000104139 | -0.569368618 |
| 5895 | USH1G     | 124590 | 0.000598164 | 0.516907007  |
| 5896 | ZPBP2     | 124626 | 0.00018503  | 0.553225242  |
| 5897 | C17orf46  | 124783 | 1.13E-11    | 0.854725004  |
| 5898 | CCDC43    | 124808 | 0.006297582 | -0.426417934 |
| 5899 | CNTD1     | 124817 | 1.43E-06    | 0.666510252  |
| 5900 | WFIKKN2   | 124857 | 0.00067544  | 0.512748017  |
| 5901 | B4GALNT2  | 124872 | 1.70E-06    | 0.663162515  |
| 5902 | C17orf49  | 124944 | 0.005564099 | -0.431859558 |
| 5903 | C17orf57  | 124989 | 6.40E-07    | 0.681372293  |
| 5904 | WDR81     | 124997 | 0.00469533  | 0.439175137  |
| 5905 | TBC1D16   | 125058 | 0.00367154  | -0.449510908 |
| 5906 | GJD3      | 125111 | 1.30E-11    | 0.84527514   |
| 5907 | KRT222P   | 125113 | 1.28E-09    | 0.77577684   |
| 5908 | SMCR7     | 125170 | 0.005687377 | -0.430886477 |
| 5909 | C18orf51  | 125704 | 4.73E-09    | 0.758315975  |
| 5910 | ZNF543    | 125919 | 8.71E-06    | 0.629763342  |
| 5911 | RAVER1    | 125950 | 0.001770529 | 0.478133011  |
| 5912 | COX6B2    | 125965 | 3.16E-06    | 0.650929411  |
| 5913 | MBD3L2    | 125997 | 4.26E-08    | 0.72640379   |
| 5914 | PCP2      | 126006 | 0.005362628 | -0.433407064 |
| 5915 | ZNF491    | 126069 | 0.00848814  | 0.412621529  |
| 5916 | C19orf39  | 126074 | 0.000630393 | -0.51511679  |
| 5917 | C19orf41  | 126123 | 3.79E-09    | 0.761465536  |
| 5918 | LOC126147 | 126147 | 9.58E-06    | 0.6276166    |
| 5919 | NLRP8     | 126205 | 0.00181     | 0.477320154  |
| 5920 | MOBKL2A   | 126308 | 1.49E-10    | 0.804568748  |
| 5921 | C19orf28  | 126321 | 0.001334838 | -0.488744918 |
| 5922 | GIPC3     | 126326 | 1.35E-05    | 0.619889185  |
| 5923 | NDUFA11   | 126328 | 0.00700223  | -0.421688685 |
| 5924 | LRRC25    | 126364 | 1.05E-10    | 0.809172838  |
| 5925 | WTIP      | 126374 | 0.001776667 | -0.478004574 |
| 5926 | HSPB6     | 126393 | 7.41E-09    | 0.752146457  |
| 5927 | CYP4F22   | 126410 | 0.005672202 | 0.431017501  |
| 5928 | LOC126536 | 126536 | 0.002034269 | 0.47290459   |
| 5929 | FAM148C   | 126567 | 3.23E-10    | 0.794012762  |
| 5930 | RPTN      | 126638 | 2.37E-10    | 0.79806807   |
| 5931 | SHE       | 126669 | 4.69E-09    | 0.758440327  |
| 5932 | C1orf172  | 126695 | 0.009563222 | -0.406948675 |
| 5933 | C1orf96   | 126731 | 6.68E-09    | 0.753572776  |
| 5934 | LRRC38    | 126755 | 0.001498294 | 0.484398469  |

|      |           |        |             |              |
|------|-----------|--------|-------------|--------------|
| 5935 | B3GALT6   | 126792 | 0.003476039 | -0.451813161 |
| 5936 | C1orf161  | 126868 | 0.007336777 | -0.419522538 |
| 5937 | LOC126917 | 126917 | 0.000169449 | 0.555729332  |
| 5938 | ASB17     | 127247 | 2.21E-05    | 0.608510681  |
| 5939 | DMBX1     | 127343 | 0.001014489 | 0.498532311  |
| 5940 | TMCO2     | 127391 | 2.17E-08    | 0.736710374  |
| 5941 | ZNF684    | 127396 | 1.42E-08    | 0.742986689  |
| 5942 | C1orf83   | 127428 | 0.007323717 | 0.419635675  |
| 5943 | GJB4      | 127534 | 8.86E-08    | 0.714902831  |
| 5944 | DCST2     | 127579 | 8.27E-07    | 0.676673164  |
| 5945 | TEDDM1    | 127670 | 1.31E-07    | 0.708698212  |
| 5946 | C1orf122  | 127687 | 0.001393138 | -0.487132226 |
| 5947 | FLJ32784  | 127731 | 1.03E-09    | 0.778702492  |
| 5948 | SYT2      | 127833 | 2.40E-08    | 0.735216397  |
| 5949 | LOC127841 | 127841 | 2.00E-05    | 0.610927054  |
| 5950 | UHMK1     | 127933 | 6.88E-05    | -0.580291283 |
| 5951 | WDR64     | 128025 | 0.000323    | 0.53668878   |
| 5952 | C1orf131  | 128061 | 0.002537566 | -0.464463123 |
| 5953 | EDARADD   | 128178 | 2.05E-05    | 0.610361134  |
| 5954 | KLF17     | 128209 | 1.61E-09    | 0.772768393  |
| 5955 | TMEM125   | 128218 | 0.000271397 | -0.541945279 |
| 5956 | C1orf182  | 128229 | 2.30E-11    | 0.832679494  |
| 5957 | IQGAP3    | 128239 | 1.30E-05    | 0.620756636  |
| 5958 | APOA1BP   | 128240 | 0.000242191 | -0.545374326 |
| 5959 | MRPL55    | 128308 | 0.002741339 | -0.461337701 |
| 5960 | TMEM77    | 128338 | 3.97E-06    | -0.646353244 |
| 5961 | BHLHB4    | 128408 | 0.002774528 | 0.460830631  |
| 5962 | WFDC12    | 128488 | 0.005922723 | 0.429082329  |
| 5963 | C20orf174 | 128611 | 0.000361914 | 0.533020114  |
| 5964 | Unknown   | 128646 | 6.76E-10    | 0.784356869  |
| 5965 | PROKR2    | 128674 | 7.42E-08    | 0.717672629  |
| 5966 | C20orf94  | 128710 | 0.002772233 | -0.460880464 |
| 5967 | CSTL1     | 128817 | 0.000137158 | 0.561678043  |
| 5968 | C20orf166 | 128826 | 9.50E-06    | 0.62779779   |
| 5969 | C20orf144 | 128864 | 3.49E-06    | 0.648936204  |
| 5970 | GAB4      | 128954 | 3.08E-06    | 0.651469498  |
| 5971 | LOC128977 | 128977 | 0.002490401 | -0.46522229  |
| 5972 | C22orf25  | 128989 | 0.000425514 | -0.527963724 |
| 5973 | ZNF280A   | 129025 | 0.000302674 | 0.538625942  |
| 5974 | SGSM1     | 129049 | 0.000903605 | 0.502740625  |
| 5975 | CCDC128   | 129285 | 0.006639524 | -0.424099966 |
| 5976 | TMEM150   | 129303 | 0.000479292 | 0.524171079  |
| 5977 | NUP35     | 129401 | 0.002686607 | -0.462158331 |
| 5978 | MITD1     | 129531 | 0.001513695 | -0.484023837 |
| 5979 | MBOAT2    | 129642 | 2.04E-09    | 0.769601731  |

|      |           |        |             |              |
|------|-----------|--------|-------------|--------------|
| 5980 | CNTNAP5   | 129684 | 2.68E-08    | 0.733445591  |
| 5981 | TAF8      | 129685 | 0.000247199 | 0.544751838  |
| 5982 | ACMSD     | 130013 | 1.60E-05    | 0.616047863  |
| 5983 | LOC130074 | 130074 | 4.09E-05    | -0.593511981 |
| 5984 | RFTN2     | 130132 | 2.40E-09    | 0.767454388  |
| 5985 | LOC130355 | 130355 | 0.003732523 | -0.448838818 |
| 5986 | ACVR1C    | 130399 | 0.008398649 | 0.413151552  |
| 5987 | TTC32     | 130502 | 0.002628414 | -0.463050496 |
| 5988 | UBR3      | 130507 | 0.003636433 | -0.449913532 |
| 5989 | KCTD18    | 130535 | 0.009257461 | -0.408502559 |
| 5990 | ALS2CR12  | 130540 | 5.86E-06    | 0.638248501  |
| 5991 | ZNF513    | 130557 | 0.001882895 | -0.475773509 |
| 5992 | GALM      | 130589 | 0.003816448 | -0.447924202 |
| 5993 | CPO       | 130749 | 3.04E-09    | 0.76435902   |
| 5994 | PQLC3     | 130814 | 0.003694138 | -0.449257135 |
| 5995 | LOC130951 | 130951 | 7.41E-08    | 0.717716752  |
| 5996 | KCNH8     | 131096 | 6.57E-11    | 0.815372664  |
| 5997 | FAM3D     | 131177 | 5.88E-10    | 0.78611512   |
| 5998 | ZPLD1     | 131368 | 3.40E-06    | 0.649476461  |
| 5999 | LYZL4     | 131375 | 0.000152576 | 0.558736011  |
| 6000 | FAM131A   | 131408 | 0.004309288 | -0.442786113 |
| 6001 | CD200R1   | 131450 | 1.59E-06    | 0.664439119  |
| 6002 | TMEM42    | 131616 | 1.86E-06    | -0.661440727 |
| 6003 | C3orf44   | 131831 | 1.81E-07    | 0.703352916  |
| 6004 | METTL6    | 131965 | 0.004239132 | 0.443519103  |
| 6005 | C3orf31   | 132001 | 1.35E-07    | 0.70814389   |
| 6006 | C3orf49   | 132200 | 2.66E-06    | 0.654406715  |
| 6007 | SYNPR     | 132204 | 1.52E-06    | 0.665350348  |
| 6008 | SCLT1     | 132320 | 0.004017313 | 0.445755202  |
| 6009 | TMEM155   | 132332 | 0.000686006 | 0.512228012  |
| 6010 | LOC132430 | 132430 | 3.37E-11    | 0.826060807  |
| 6011 | ADAD1     | 132612 | 2.28E-06    | 0.657489724  |
| 6012 | NHEDC2    | 133308 | 0.00094145  | 0.501151812  |
| 6013 | SLCO6A1   | 133482 | 0.004638593 | 0.439696158  |
| 6014 | LOC133491 | 133491 | 1.44E-05    | 0.618458912  |
| 6015 | FLJ40243  | 133558 | 3.96E-06    | 0.646391178  |
| 6016 | EGFLAM    | 133584 | 1.82E-05    | 0.613183435  |
| 6017 | UGT3A1    | 133688 | 4.64E-07    | 0.687087711  |
| 6018 | LOC133874 | 133874 | 1.32E-05    | 0.62048714   |
| 6019 | LOC134145 | 134145 | 0.005324417 | -0.433743711 |
| 6020 | CMBL      | 134147 | 0.0044628   | -0.441280619 |
| 6021 | POU5F2    | 134187 | 1.38E-09    | 0.77480315   |
| 6022 | TMEM174   | 134288 | 2.98E-08    | 0.731812425  |
| 6023 | LSM11     | 134353 | 0.000613269 | 0.516087177  |
| 6024 | C5orf37   | 134359 | 4.72E-05    | 0.589919398  |

|      |           |        |             |              |
|------|-----------|--------|-------------|--------------|
| 6025 | ANKRD43   | 134548 | 2.01E-09    | 0.769807661  |
| 6026 | SHROOM1   | 134549 | 8.99E-08    | 0.714639754  |
| 6027 | C5orf24   | 134553 | 0.001055296 | -0.49709886  |
| 6028 | RLBP1L2   | 134829 | 1.23E-06    | 0.669309755  |
| 6029 | TAAR9     | 134860 | 0.000534853 | 0.520576117  |
| 6030 | TAAR1     | 134864 | 0.000204791 | 0.550286436  |
| 6031 | C6orf141  | 135398 | 4.93E-08    | 0.724132865  |
| 6032 | WBSCR28   | 135886 | 0.00249499  | 0.465139698  |
| 6033 | TRIM50    | 135892 | 2.46E-09    | 0.767134148  |
| 6034 | C7orf34   | 135927 | 8.53E-08    | 0.715484247  |
| 6035 | NOBOX     | 135935 | 5.33E-06    | 0.64023165   |
| 6036 | OR6B1     | 135946 | 1.02E-05    | 0.626255134  |
| 6037 | EMID2     | 136227 | 1.22E-08    | 0.745129976  |
| 6038 | LOC136242 | 136242 | 1.99E-06    | 0.660144862  |
| 6039 | KLF14     | 136259 | 7.02E-10    | 0.783899048  |
| 6040 | C7orf45   | 136263 | 0.007330394 | 0.419579792  |
| 6041 | MTPN      | 136319 | 2.91E-05    | 0.601889739  |
| 6042 | ASB10     | 136371 | 6.03E-08    | 0.720937541  |
| 6043 | TRY1      | 136541 | 0.003532095 | 0.451145336  |
| 6044 | C7orf11   | 136647 | 0.004880422 | -0.437522842 |
| 6045 | GOT1L1    | 137362 | 5.46E-09    | 0.756380611  |
| 6046 | ABRA      | 137735 | 5.06E-05    | 0.588180223  |
| 6047 | SGCZ      | 137868 | 0.000327978 | 0.536239284  |
| 6048 | LOC137886 | 137886 | 0.006078891 | -0.427938387 |
| 6049 | WDR21C    | 138009 | 0.000176219 | 0.554626825  |
| 6050 | RALYL     | 138046 | 2.23E-11    | 0.833681184  |
| 6051 | C9orf41   | 138199 | 0.007217773 | -0.420342373 |
| 6052 | LCN8      | 138307 | 4.53E-06    | 0.643644317  |
| 6053 | TAF1L     | 138474 | 2.80E-09    | 0.765409886  |
| 6054 | ANKRD19   | 138649 | 3.18E-08    | 0.730828248  |
| 6055 | C9orf23   | 138716 | 1.15E-06    | 0.670497604  |
| 6056 | C9orf131  | 138724 | 2.97E-07    | 0.694887254  |
| 6057 | LOC138948 | 138948 | 1.46E-09    | 0.774014981  |
| 6058 | MAGEC3    | 139081 | 0.00929841  | 0.40826018   |
| 6059 | CXorf20   | 139105 | 0.002647533 | 0.462759869  |
| 6060 | FAM123B   | 139285 | 5.49E-05    | 0.586168048  |
| 6061 | FUNDC1    | 139341 | 1.26E-05    | -0.621565579 |
| 6062 | VENTXP1   | 139538 | 7.86E-10    | 0.782467437  |
| 6063 | FOXR2     | 139628 | 0.003222905 | 0.454893722  |
| 6064 | GAB3      | 139716 | 6.71E-06    | 0.635416162  |
| 6065 | PNCK      | 139728 | 2.02E-07    | 0.701471738  |
| 6066 | SPIN4     | 139886 | 0.001063471 | -0.496823628 |
| 6067 | KRTAP13-1 | 140258 | 8.32E-08    | 0.715936537  |
| 6068 | MUC17     | 140453 | 2.60E-09    | 0.766313314  |
| 6069 | ASB6      | 140459 | 1.92E-06    | 0.660870401  |

|      |           |        |             |              |
|------|-----------|--------|-------------|--------------|
| 6070 | ASB8      | 140461 | 0.007875313 | -0.416251383 |
| 6071 | MYL6B     | 140465 | 0.000772296 | -0.508181236 |
| 6072 | RNF32     | 140545 | 4.69E-09    | 0.758466263  |
| 6073 | APOBEC3D  | 140564 | 3.05E-07    | 0.69441595   |
| 6074 | ZFP28     | 140612 | 1.51E-05    | 0.617414052  |
| 6075 | C20orf96  | 140680 | 9.49E-06    | 0.627822738  |
| 6076 | C20orf70  | 140683 | 6.53E-07    | 0.680999537  |
| 6077 | ZBTB46    | 140685 | 0.000511259 | -0.522073232 |
| 6078 | CTCFL     | 140690 | 3.42E-06    | 0.649330868  |
| 6079 | C20orf160 | 140706 | 7.92E-09    | 0.751154299  |
| 6080 | BRI3BP    | 140707 | 1.41E-08    | 0.743102829  |
| 6081 | C20orf118 | 140711 | 0.002812568 | -0.460328516 |
| 6082 | SPAG4L    | 140732 | 0.001591642 | 0.48215879   |
| 6083 | NRSN1     | 140767 | 9.11E-05    | 0.572921955  |
| 6084 | SMCR8     | 140775 | 0.000969617 | -0.500125246 |
| 6085 | TRPM6     | 140803 | 1.83E-05    | 0.612976496  |
| 6086 | KRT72     | 140807 | 1.63E-05    | 0.615615362  |
| 6087 | SRXN1     | 140809 | 0.00159282  | -0.482129018 |
| 6088 | Unknown   | 140828 | 0.005245981 | 0.434412581  |
| 6089 | ZSWIM3    | 140831 | 4.08E-06    | 0.645759586  |
| 6090 | C20orf62  | 140834 | 3.73E-11    | 0.824690695  |
| 6091 | C20orf79  | 140856 | 0.000465291 | 0.525163218  |
| 6092 | WFDC6     | 140870 | 2.87E-08    | 0.732392233  |
| 6093 | C20orf173 | 140873 | 5.10E-05    | 0.58800089   |
| 6094 | C20orf93  | 140875 | 3.75E-08    | 0.728271623  |
| 6095 | DEFB129   | 140881 | 6.90E-07    | 0.679989633  |
| 6096 | SFRS12    | 140890 | 0.001122863 | 0.494904614  |
| 6097 | C20orf152 | 140894 | 7.93E-09    | 0.751123167  |
| 6098 | STK35     | 140901 | 3.50E-05    | -0.597429715 |
| 6099 | C5orf20   | 140947 | 2.52E-05    | 0.605339471  |
| 6100 | MIB2      | 142678 | 4.42E-05    | -0.591594922 |
| 6101 | SLC34A3   | 142680 | 3.33E-08    | 0.730090757  |
| 6102 | RAB40A    | 142684 | 9.49E-10    | 0.779923753  |
| 6103 | ASB15     | 142685 | 7.26E-09    | 0.752465352  |
| 6104 | ASB14     | 142686 | 0.000133491 | 0.562414865  |
| 6105 | ASB12     | 142689 | 2.18E-08    | 0.736595475  |
| 6106 | LIPJ      | 142910 | 1.55E-08    | 0.741760311  |
| 6107 | C10orf46  | 143384 | 0.001157462 | -0.493829642 |
| 6108 | PSMA8     | 143471 | 0.00093728  | 0.501314184  |
| 6109 | C11orf40  | 143501 | 0.000311118 | 0.537824869  |
| 6110 | OR51E1    | 143503 | 1.21E-10    | 0.807225455  |
| 6111 | LOC143678 | 143678 | 1.27E-06    | 0.668714124  |
| 6112 | FAM76B    | 143684 | 0.006914967 | -0.422270397 |
| 6113 | SESN3     | 143686 | 0.00128077  | 0.490202511  |
| 6114 | TMEM86A   | 144110 | 2.66E-11    | 0.829943601  |



|      |           |        |             |              |
|------|-----------|--------|-------------|--------------|
| 6115 | OR10A5    | 144124 | 1.65E-06    | 0.663753616  |
| 6116 | DNHD1     | 144132 | 0.000100607 | 0.570288242  |
| 6117 | CPNE8     | 144402 | 3.62E-07    | 0.691530944  |
| 6118 | GLT1D1    | 144423 | 0.003428813 | 0.452339919  |
| 6119 | LOC144438 | 144438 | 0.000254029 | -0.543921782 |
| 6120 | A2ML1     | 144568 | 6.36E-08    | 0.720056302  |
| 6121 | FBXL14    | 144699 | 0.000116937 | 0.566125892  |
| 6122 | LOC144766 | 144766 | 0.00091958  | 0.502036557  |
| 6123 | LOC144817 | 144817 | 3.00E-09    | 0.764541018  |
| 6124 | LOC144920 | 144920 | 0.007254494 | 0.420083589  |
| 6125 | RDH12     | 145226 | 2.31E-05    | 0.607516742  |
| 6126 | GSC       | 145258 | 0.000738835 | 0.509713387  |
| 6127 | SERPINA12 | 145264 | 1.17E-06    | 0.670306078  |
| 6128 | ABHD12B   | 145447 | 1.25E-06    | 0.668982699  |
| 6129 | C15orf43  | 145645 | 0.005917881 | 0.429128509  |
| 6130 | LOC145678 | 145678 | 2.63E-07    | 0.696947927  |
| 6131 | LOC145694 | 145694 | 1.89E-11    | 0.836056651  |
| 6132 | LOC145757 | 145757 | 7.84E-08    | 0.716838756  |
| 6133 | FAM81A    | 145773 | 1.93E-08    | 0.738532998  |
| 6134 | LOC145783 | 145783 | 0.007254494 | 0.420094597  |
| 6135 | LOC145820 | 145820 | 7.31E-11    | 0.814013095  |
| 6136 | LOC145837 | 145837 | 4.73E-05    | 0.589866686  |
| 6137 | TMCO5     | 145942 | 3.02E-10    | 0.794853418  |
| 6138 | LOC145945 | 145945 | 0.001472948 | 0.48503934   |
| 6139 | SPATA8    | 145946 | 8.43E-05    | 0.574995958  |
| 6140 | NRG4      | 145957 | 0.000148081 | 0.559549619  |
| 6141 | TMEM83    | 145978 | 0.000140539 | 0.561001715  |
| 6142 | VWA3A     | 146177 | 0.001136836 | 0.494462289  |
| 6143 | ZFP90     | 146198 | 0.008658779 | -0.411672436 |
| 6144 | BEAN      | 146227 | 5.11E-06    | 0.641118559  |
| 6145 | LOC146325 | 146325 | 0.004318306 | -0.442695009 |
| 6146 | FLJ32252  | 146336 | 1.29E-09    | 0.775659103  |
| 6147 | FLJ25404  | 146378 | 0.000290104 | 0.539932082  |
| 6148 | LOC146429 | 146429 | 0.008598288 | -0.41202094  |
| 6149 | MGC45438  | 146556 | 8.02E-06    | 0.631590296  |
| 6150 | C16orf71  | 146562 | 0.000949119 | 0.500873077  |
| 6151 | HRNBP3    | 146713 | 5.88E-11    | 0.817689944  |
| 6152 | CD300LF   | 146722 | 1.02E-09    | 0.778911955  |
| 6153 | TCAM1     | 146771 | 2.55E-08    | 0.734207692  |
| 6154 | LOC146795 | 146795 | 2.04E-05    | 0.610498479  |
| 6155 | CCDC42    | 146849 | 1.95E-06    | 0.660580388  |
| 6156 | C17orf38  | 146850 | 2.16E-08    | 0.736793786  |
| 6157 | ODF4      | 146852 | 0.000617749 | 0.515826481  |
| 6158 | AMAC1     | 146861 | 6.04E-05    | 0.583621082  |
| 6159 | EME1      | 146956 | 4.22E-08    | 0.726546832  |

|      |           |        |             |              |
|------|-----------|--------|-------------|--------------|
| 6160 | TMC8      | 147138 | 0.003043136 | 0.457238524  |
| 6161 | TRIM16L   | 147166 | 9.04E-05    | 0.573122967  |
| 6162 | LRRC37B2  | 147172 | 6.35E-11    | 0.816040954  |
| 6163 | TMEM99    | 147184 | 8.10E-08    | 0.716339659  |
| 6164 | C18orf15  | 147276 | 0.000145322 | 0.560089885  |
| 6165 | CBLN2     | 147381 | 1.78E-06    | 0.662276014  |
| 6166 | DSG4      | 147409 | 1.15E-09    | 0.777276182  |
| 6167 | ANKRD29   | 147463 | 0.008555853 | 0.412241736  |
| 6168 | LOC147646 | 147646 | 8.82E-06    | 0.629445787  |
| 6169 | Unknown   | 147694 | 3.74E-09    | 0.761633961  |
| 6170 | KLC3      | 147700 | 5.44E-11    | 0.818830865  |
| 6171 | LYPD4     | 147719 | 4.42E-07    | 0.687941112  |
| 6172 | LOC147727 | 147727 | 0.009443226 | -0.407525501 |
| 6173 | HIPK4     | 147746 | 3.79E-09    | 0.761434007  |
| 6174 | ZNF524    | 147807 | 2.28E-06    | 0.657400382  |
| 6175 | ZNF563    | 147837 | 1.08E-09    | 0.778112827  |
| 6176 | SPC24     | 147841 | 0.001728918 | 0.479049792  |
| 6177 | FLJ32658  | 147872 | 1.08E-05    | 0.624862953  |
| 6178 | SIX5      | 147912 | 0.003482559 | -0.451742179 |
| 6179 | IGFL2     | 147920 | 8.52E-09    | 0.750123434  |
| 6180 | ZNF542    | 147947 | 9.92E-09    | 0.748033676  |
| 6181 | ZNF582    | 147948 | 1.17E-06    | 0.670325565  |
| 6182 | ZNF583    | 147949 | 4.97E-09    | 0.757623389  |
| 6183 | CAPN12    | 147968 | 3.31E-08    | 0.730143295  |
| 6184 | C19orf23  | 148046 | 0.003829154 | 0.447762951  |
| 6185 | ZNRF4     | 148066 | 1.14E-06    | 0.670715956  |
| 6186 | ZNF599    | 148103 | 0.000416979 | 0.528601438  |
| 6187 | TMEM162   | 148109 | 1.64E-07    | 0.705076779  |
| 6188 | C19orf55  | 148137 | 2.26E-11    | 0.832982582  |
| 6189 | LOC148145 | 148145 | 0.001356364 | 0.488162907  |
| 6190 | ZNF558    | 148156 | 0.001646804 | -0.480901758 |
| 6191 | FLJ25328  | 148231 | 1.76E-05    | 0.613895877  |
| 6192 | C1orf58   | 148362 | 0.001002715 | -0.498954992 |
| 6193 | C1orf52   | 148423 | 0.000925988 | -0.50179917  |
| 6194 | PHF13     | 148479 | 1.26E-05    | -0.621486047 |
| 6195 | NBPF4     | 148545 | 0.000124423 | 0.564345883  |
| 6196 | UBE2U     | 148581 | 0.000813738 | 0.50633692   |
| 6197 | LOC148709 | 148709 | 2.54E-07    | 0.697542751  |
| 6198 | C1orf76   | 148753 | 0.000413628 | 0.528868351  |
| 6199 | MFSD4     | 148808 | 0.004574277 | 0.44026936   |
| 6200 | PM20D1    | 148811 | 1.66E-09    | 0.772381286  |
| 6201 | Unknown   | 148824 | 1.67E-06    | 0.663508523  |
| 6202 | C1orf213  | 148898 | 8.04E-06    | 0.631531759  |
| 6203 | KNCN      | 148930 | 5.53E-06    | 0.639463295  |
| 6204 | GLIS1     | 148979 | 6.71E-10    | 0.784454886  |

|      |             |        |             |              |
|------|-------------|--------|-------------|--------------|
| 6205 | MGC27382    | 149047 | 7.11E-07    | 0.679387191  |
| 6206 | ZNF362      | 149076 | 0.000929855 | -0.501633719 |
| 6207 | LOC149086   | 149086 | 3.27E-09    | 0.763399853  |
| 6208 | DCST1       | 149095 | 3.28E-06    | 0.650155744  |
| 6209 | IL23R       | 149233 | 1.66E-10    | 0.803007142  |
| 6210 | FAM78B      | 149297 | 5.59E-05    | 0.585688743  |
| 6211 | TMEM58      | 149345 | 0.001777468 | -0.477980647 |
| 6212 | FLJ30430    | 149373 | 8.19E-10    | 0.781902204  |
| 6213 | WDR65       | 149465 | 2.72E-10    | 0.796192363  |
| 6214 | C1orf210    | 149466 | 0.000936858 | 0.501333469  |
| 6215 | CCDC24      | 149473 | 0.006944882 | -0.422077128 |
| 6216 | RNF187      | 149603 | 0.000301316 | -0.538777012 |
| 6217 | Unknown     | 149628 | 5.17E-09    | 0.757095363  |
| 6218 | FAM71A      | 149647 | 2.61E-11    | 0.830486466  |
| 6219 | LOC149684   | 149684 | 2.50E-10    | 0.797328098  |
| 6220 | GTSF1L      | 149699 | 1.65E-07    | 0.704940068  |
| 6221 | Unknown     | 149703 | 0.000225154 | 0.547516788  |
| 6222 | LOC149773   | 149773 | 4.94E-08    | 0.72409831   |
| 6223 | PRNT        | 149830 | 0.004171547 | 0.444196268  |
| 6224 | LOC149837   | 149837 | 4.33E-05    | 0.592154047  |
| 6225 | COMMD7      | 149951 | 0.000110688 | -0.567673448 |
| 6226 | C20orf186   | 149954 | 5.63E-08    | 0.722059234  |
| 6227 | LIPI        | 149998 | 6.54E-11    | 0.815559831  |
| 6228 | LOC150005   | 150005 | 2.16E-07    | 0.700336747  |
| 6229 | LOC150051   | 150051 | 8.15E-11    | 0.81250751   |
| 6230 | IGSF5       | 150084 | 3.55E-06    | 0.648595465  |
| 6231 | C21orf129   | 150135 | 0.000146907 | 0.55979941   |
| 6232 | C21orf121   | 150142 | 4.46E-07    | 0.687772198  |
| 6233 | C21orf128   | 150147 | 2.01E-05    | 0.610776702  |
| 6234 | NHEDC1      | 150159 | 0.000110105 | 0.567827624  |
| 6235 | FLJ32575    | 150197 | 2.58E-08    | 0.734044232  |
| 6236 | LOC150223   | 150223 | 0.000821216 | -0.506001972 |
| 6237 | C22orf15    | 150248 | 9.18E-05    | 0.572715729  |
| 6238 | HORMAD2     | 150280 | 3.10E-09    | 0.764118832  |
| 6239 | DUSP18      | 150290 | 1.61E-11    | 0.838217731  |
| 6240 | C22orf27    | 150291 | 0.002589064 | 0.463654729  |
| 6241 | RP1-127L4.6 | 150297 | 1.72E-07    | 0.704277815  |
| 6242 | MEI1        | 150365 | 1.68E-10    | 0.80284509   |
| 6243 | FAM109B     | 150368 | 1.27E-05    | 0.621316964  |
| 6244 | NFAM1       | 150372 | 6.04E-09    | 0.75494328   |
| 6245 | TTL         | 150465 | 0.000702303 | -0.511435289 |
| 6246 | CKAP2L      | 150468 | 1.03E-10    | 0.809462496  |
| 6247 | FLJ32063    | 150538 | 4.23E-05    | 0.592744056  |
| 6248 | LOC150568   | 150568 | 0.00041012  | 0.529127791  |
| 6249 | SMYD1       | 150572 | 1.01E-08    | 0.747826148  |

|      |              |        |             |              |
|------|--------------|--------|-------------|--------------|
| 6250 | LOC150577    | 150577 | 0.008721184 | 0.41134765   |
| 6251 | C2orf15      | 150590 | 0.000730994 | -0.510049576 |
| 6252 | MYEOV2       | 150678 | 8.18E-05    | -0.575769662 |
| 6253 | ALS2CR13     | 150864 | 0.00135515  | -0.488219073 |
| 6254 | FAM59B       | 150946 | 4.22E-07    | 0.688764479  |
| 6255 | DKFZp434G179 | 150992 | 5.28E-07    | 0.684829764  |
| 6256 | ZSWIM2       | 151112 | 3.69E-08    | 0.728534528  |
| 6257 | LOC151146    | 151146 | 4.04E-11    | 0.823117616  |
| 6258 | LOC151171    | 151171 | 1.33E-07    | 0.708498339  |
| 6259 | FAM132B      | 151176 | 2.10E-11    | 0.834651013  |
| 6260 | PPP1R1C      | 151242 | 1.69E-10    | 0.802758224  |
| 6261 | ALS2CR11     | 151254 | 2.50E-09    | 0.766888145  |
| 6262 | FLJ39822     | 151258 | 0.001543218 | 0.483320851  |
| 6263 | CCDC140      | 151278 | 1.57E-11    | 0.839191246  |
| 6264 | SLC23A3      | 151295 | 1.05E-10    | 0.808996021  |
| 6265 | GPBAR1       | 151306 | 4.29E-08    | 0.726254884  |
| 6266 | WDSUB1       | 151525 | 0.000200385 | -0.550903705 |
| 6267 | UPP2         | 151531 | 2.30E-09    | 0.768027036  |
| 6268 | LOC151534    | 151534 | 6.35E-11    | 0.815885974  |
| 6269 | DTX3L        | 151636 | 0.000434901 | -0.527290611 |
| 6270 | FAM19A4      | 151647 | 4.76E-05    | 0.589700771  |
| 6271 | LOC151657    | 151657 | 1.01E-06    | 0.672962022  |
| 6272 | LOC151760    | 151760 | 7.49E-07    | 0.678449472  |
| 6273 | CPNE9        | 151835 | 0.006039118 | 0.428200887  |
| 6274 | DPPA2        | 151871 | 0.000208734 | 0.549737483  |
| 6275 | LOC151877    | 151877 | 1.63E-06    | 0.664001784  |
| 6276 | BTLA         | 151888 | 0.000756454 | 0.508922013  |
| 6277 | CCDC12       | 151903 | 0.000832436 | -0.505546916 |
| 6278 | PPP4R2       | 151987 | 3.08E-08    | -0.731279312 |
| 6279 | LOC152024    | 152024 | 1.07E-07    | 0.711844953  |
| 6280 | FLJ31715     | 152048 | 1.25E-07    | 0.709492891  |
| 6281 | C3orf22      | 152065 | 0.003528416 | 0.451197969  |
| 6282 | LOC152118    | 152118 | 0.001236984 | 0.491475677  |
| 6283 | CMTM8        | 152189 | 0.006537485 | -0.424792982 |
| 6284 | Unknown      | 152206 | 1.41E-06    | 0.666692013  |
| 6285 | C3orf30      | 152405 | 0.005358365 | 0.433445693  |
| 6286 | SH3D19       | 152503 | 0.000514746 | 0.521857394  |
| 6287 | NPAL1        | 152519 | 2.07E-10    | 0.799943271  |
| 6288 | LOC152578    | 152578 | 0.005446392 | 0.432747776  |
| 6289 | SCFD2        | 152579 | 0.001801878 | 0.477476874  |
| 6290 | Unknown      | 152586 | 6.13E-05    | 0.58325401   |
| 6291 | C4orf38      | 152641 | 4.64E-08    | 0.725109481  |
| 6292 | Unknown      | 152687 | 0.000111782 | 0.567377781  |
| 6293 | C4orf39      | 152756 | 3.72E-10    | 0.792121587  |
| 6294 | THAP6        | 152815 | 5.86E-09    | 0.755365711  |

|      |             |        |             |              |
|------|-------------|--------|-------------|--------------|
| 6295 | C4orf26     | 152816 | 6.02E-10    | 0.78579159   |
| 6296 | FAM53A      | 152877 | 2.48E-08    | 0.734609224  |
| 6297 | RASGEF1B    | 153020 | 3.39E-08    | 0.729784442  |
| 6298 | DAB2IP      | 153090 | 0.005915112 | -0.429151955 |
| 6299 | SPINK5L3    | 153218 | 1.11E-05    | 0.624300638  |
| 6300 | IRX2        | 153572 | 0.002491069 | 0.465205449  |
| 6301 | ARSK        | 153642 | 0.000528432 | 0.520957724  |
| 6302 | FAM71B      | 153745 | 0.000171101 | 0.555439248  |
| 6303 | RNF145      | 153830 | 0.009921588 | -0.405170461 |
| 6304 | LOC153910   | 153910 | 0.000720469 | 0.510538459  |
| 6305 | SAMD3       | 154075 | 9.11E-05    | 0.572920946  |
| 6306 | RP4-662A9.2 | 154089 | 1.42E-10    | 0.805247673  |
| 6307 | LOC154092   | 154092 | 0.004053032 | 0.445359682  |
| 6308 | MBOAT1      | 154141 | 0.00686772  | -0.422587189 |
| 6309 | HDGFL1      | 154150 | 6.87E-10    | 0.784168499  |
| 6310 | C6orf112    | 154442 | 0.000559587 | 0.519100698  |
| 6311 | LOC154761   | 154761 | 8.30E-11    | 0.812108655  |
| 6312 | Unknown     | 154791 | 3.08E-05    | -0.600541795 |
| 6313 | AMOT        | 154796 | 0.000813493 | 0.506357214  |
| 6314 | VKORC1L1    | 154807 | 0.001007818 | -0.498766788 |
| 6315 | AMOTL1      | 154810 | 5.41E-05    | 0.586514795  |
| 6316 | LOC154822   | 154822 | 2.48E-11    | 0.831540469  |
| 6317 | LOC154872   | 154872 | 2.94E-05    | 0.601613483  |
| 6318 | GIMAP8      | 155038 | 0.007847222 | 0.416406382  |
| 6319 | ZNF746      | 155061 | 0.001743441 | 0.478724762  |
| 6320 | ATP6V0E2    | 155066 | 0.008833647 | -0.410768882 |
| 6321 | AMZ1        | 155185 | 4.66E-05    | 0.590223036  |
| 6322 | VPS37D      | 155382 | 2.09E-10    | 0.799779523  |
| 6323 | RBM33       | 155435 | 0.006002764 | -0.428459058 |
| 6324 | MGC27345    | 157247 | 0.005373936 | -0.433322318 |
| 6325 | PEBP4       | 157310 | 2.91E-05    | 0.601857488  |
| 6326 | CDCA2       | 157313 | 8.09E-09    | 0.750851438  |
| 6327 | LOC157562   | 157562 | 0.002197314 | 0.470016059  |
| 6328 | FAM87A      | 157693 | 2.88E-06    | 0.652878402  |
| 6329 | Unknown     | 157740 | 0.00018132  | 0.553786654  |
| 6330 | TMEM74      | 157753 | 2.77E-11    | 0.829348619  |
| 6331 | C9orf62     | 157927 | 5.28E-11    | 0.819532634  |
| 6332 | LOC157931   | 157931 | 6.02E-11    | 0.817148116  |
| 6333 | C9orf66     | 157983 | 4.43E-10    | 0.789787759  |
| 6334 | C9orf14     | 158035 | 1.11E-09    | 0.777796103  |
| 6335 | C9orf163    | 158055 | 2.45E-08    | 0.73485445   |
| 6336 | C9orf98     | 158067 | 2.62E-10    | 0.796696524  |
| 6337 | OR1Q1       | 158131 | 0.000475307 | 0.52445311   |
| 6338 | TLL1        | 158135 | 1.88E-08    | 0.738896359  |
| 6339 | HSD17B7P2   | 158160 | 1.37E-07    | 0.707900166  |

|      |               |        |             |              |
|------|---------------|--------|-------------|--------------|
| 6340 | LOC158257     | 158257 | 0.000196217 | 0.551500938  |
| 6341 | C9orf138      | 158297 | 1.54E-09    | 0.77337214   |
| 6342 | C9orf84       | 158401 | 0.000105028 | 0.569121114  |
| 6343 | C9orf97       | 158427 | 2.57E-06    | 0.655111508  |
| 6344 | ZNF645        | 158506 | 6.95E-07    | 0.679823041  |
| 6345 | LOC158572     | 158572 | 8.31E-06    | 0.630795112  |
| 6346 | ZXDB          | 158586 | 0.004048158 | -0.445411903 |
| 6347 | FLJ30672      | 158696 | 1.88E-07    | 0.702668987  |
| 6348 | RP13-102H20.1 | 158763 | 0.001439271 | 0.485921137  |
| 6349 | LOC158830     | 158830 | 1.95E-05    | 0.611549987  |
| 6350 | DGAT2L3       | 158833 | 0.000315467 | 0.53740395   |
| 6351 | FAM122C       | 159091 | 3.00E-09    | 0.764559279  |
| 6352 | RBMY2FP       | 159162 | 5.56E-09    | 0.756096163  |
| 6353 | TMEM20        | 159371 | 6.57E-10    | 0.784742299  |
| 6354 | CCDC67        | 159989 | 0.000386879 | 0.530957573  |
| 6355 | PATE          | 160065 | 0.000617749 | 0.515824547  |
| 6356 | CLEC12A       | 160364 | 2.10E-07    | 0.700795722  |
| 6357 | C12orf50      | 160419 | 8.74E-06    | 0.629684952  |
| 6358 | IFLTD1        | 160492 | 1.71E-07    | 0.704375796  |
| 6359 | CCDC60        | 160777 | 8.81E-06    | 0.629482298  |
| 6360 | FAM71D        | 161142 | 3.55E-10    | 0.792771634  |
| 6361 | C14orf49      | 161176 | 2.59E-09    | 0.766364887  |
| 6362 | CLEC14A       | 161198 | 9.80E-10    | 0.779407401  |
| 6363 | MDGA2         | 161357 | 1.92E-07    | 0.702384601  |
| 6364 | C14orf174     | 161394 | 1.15E-09    | 0.777218584  |
| 6365 | TBC1D21       | 161514 | 5.63E-10    | 0.786664697  |
| 6366 | LOC161635     | 161635 | 0.003855851 | 0.447453504  |
| 6367 | ODF3L1        | 161753 | 9.17E-10    | 0.780427126  |
| 6368 | PGBD4         | 161779 | 0.001368579 | 0.48780872   |
| 6369 | ADAL          | 161823 | 1.11E-07    | 0.711278325  |
| 6370 | EXDL1         | 161829 | 0.000855905 | 0.504615457  |
| 6371 | ZFPM1         | 161882 | 9.43E-10    | 0.780023512  |
| 6372 | ADAD2         | 161931 | 1.18E-10    | 0.807633956  |
| 6373 | LOC162073     | 162073 | 0.004112418 | -0.444765629 |
| 6374 | MGC34800      | 162137 | 7.07E-10    | 0.783809679  |
| 6375 | ANKFN1        | 162282 | 3.62E-08    | 0.728819549  |
| 6376 | SLFN5         | 162394 | 0.003854951 | -0.447468487 |
| 6377 | FAM134C       | 162427 | 0.006492117 | -0.425119898 |
| 6378 | TRPV3         | 162514 | 3.65E-09    | 0.762017396  |
| 6379 | SLC16A11      | 162515 | 1.55E-10    | 0.804056221  |
| 6380 | FBXO39        | 162517 | 0.000264958 | 0.542655326  |
| 6381 | IMP5          | 162540 | 0.000591333 | 0.517304455  |
| 6382 | FLJ16287      | 162962 | 3.75E-10    | 0.792014066  |
| 6383 | ZNF610        | 162963 | 1.36E-05    | 0.619822737  |
| 6384 | ZNF579        | 163033 | 0.003101252 | -0.456509382 |

|      |           |        |             |              |
|------|-----------|--------|-------------|--------------|
| 6385 | ZNF383    | 163087 | 2.54E-06    | 0.655357837  |
| 6386 | ZNF781    | 163115 | 5.56E-11    | 0.818489855  |
| 6387 | C19orf46  | 163183 | 0.009649957 | -0.406530648 |
| 6388 | ZNF540    | 163255 | 1.70E-10    | 0.80251989   |
| 6389 | GBP6      | 163351 | 5.80E-06    | 0.638493957  |
| 6390 | PAP2D     | 163404 | 5.00E-05    | 0.588484858  |
| 6391 | FNDC7     | 163479 | 1.51E-08    | 0.742129954  |
| 6392 | TDRD5     | 163589 | 2.50E-10    | 0.797294562  |
| 6393 | Unknown   | 163742 | 6.12E-11    | 0.81672991   |
| 6394 | SPRR4     | 163778 | 1.25E-07    | 0.709403324  |
| 6395 | C1orf55   | 163859 | 0.005699553 | -0.43079625  |
| 6396 | FAM43B    | 163933 | 2.00E-07    | 0.701681068  |
| 6397 | C1orf65   | 164127 | 0.007804386 | -0.41666077  |
| 6398 | UBL4B     | 164153 | 0.00694511  | 0.422070053  |
| 6399 | APCDD1L   | 164284 | 0.003839468 | 0.44764179   |
| 6400 | WBP2NL    | 164684 | 3.43E-11    | 0.825810509  |
| 6401 | GPR113    | 165082 | 2.11E-09    | 0.76913826   |
| 6402 | OXER1     | 165140 | 1.70E-05    | 0.614690213  |
| 6403 | CLEC4F    | 165530 | 0.000995206 | 0.499222783  |
| 6404 | PARP15    | 165631 | 9.34E-10    | 0.780177784  |
| 6405 | XIRP1     | 165904 | 1.08E-06    | 0.671764253  |
| 6406 | DCLK2     | 166614 | 0.009561489 | 0.40696103   |
| 6407 | GPR125    | 166647 | 0.000222834 | -0.547829934 |
| 6408 | ZNF509    | 166793 | 1.31E-10    | 0.806122272  |
| 6409 | OLIG3     | 167826 | 1.35E-10    | 0.805820286  |
| 6410 | RNF133    | 168433 | 3.75E-06    | 0.64755108   |
| 6411 | THAP5     | 168451 | 0.007158153 | -0.420713363 |
| 6412 | GIMAP7    | 168537 | 0.000105066 | 0.569102441  |
| 6413 | CNBD1     | 168975 | 2.26E-11    | 0.83317005   |
| 6414 | SLC30A8   | 169026 | 5.56E-07    | 0.683931248  |
| 6415 | C9orf96   | 169436 | 8.16E-11    | 0.812424368  |
| 6416 | KCNV2     | 169522 | 1.49E-08    | 0.742295014  |
| 6417 | C9orf71   | 169693 | 2.47E-05    | 0.605898974  |
| 6418 | ZNF169    | 169841 | 9.50E-07    | 0.674107502  |
| 6419 | SPIN3     | 169981 | 0.003421181 | 0.45244195   |
| 6420 | MGC17403  | 170082 | 1.18E-10    | 0.80764684   |
| 6421 | C10orf128 | 170371 | 4.88E-11    | 0.820822296  |
| 6422 | FUT11     | 170384 | 1.02E-08    | 0.74767606   |
| 6423 | OIT3      | 170392 | 0.000870209 | 0.504011415  |
| 6424 | C10orf91  | 170393 | 0.000786078 | 0.50755146   |
| 6425 | SSBP4     | 170463 | 0.001224683 | -0.491842085 |
| 6426 | CLEC4C    | 170482 | 6.40E-05    | 0.582164877  |
| 6427 | HTR3C     | 170572 | 1.39E-05    | 0.619286641  |
| 6428 | GIMAP1    | 170575 | 2.29E-08    | 0.735920663  |
| 6429 | COMMD6    | 170622 | 0.000899769 | -0.502885397 |

|      |              |        |             |              |
|------|--------------|--------|-------------|--------------|
| 6430 | PSORS1C2     | 170680 | 0.007254494 | 0.420079514  |
| 6431 | NUDT10       | 170685 | 2.22E-06    | 0.658050276  |
| 6432 | GSX2         | 170825 | 2.41E-06    | 0.656315354  |
| 6433 | KCNG3        | 170850 | 3.14E-11    | 0.826871499  |
| 6434 | ZNF721       | 170960 | 0.001461263 | -0.485352682 |
| 6435 | ANKRD24      | 170961 | 0.008355459 | -0.413420996 |
| 6436 | ZNF384       | 171017 | 8.96E-06    | 0.629097671  |
| 6437 | ASXL1        | 171023 | 0.003588211 | -0.450477987 |
| 6438 | NS3BP        | 171391 | 4.70E-09    | 0.758417418  |
| 6439 | CLYBL        | 171425 | 0.000161739 | 0.557034056  |
| 6440 | PLAC4        | 191585 | 0.005198458 | 0.434818019  |
| 6441 | PGAM5        | 192111 | 0.001484798 | 0.484735423  |
| 6442 | HIGD2A       | 192286 | 0.00198926  | -0.47373176  |
| 6443 | EIF2C4       | 192670 | 0.004610277 | -0.439944824 |
| 6444 | RDHE2        | 195814 | 0.003521046 | 0.451282011  |
| 6445 | IMMP1L       | 196294 | 0.003101004 | -0.456518872 |
| 6446 | KRT78        | 196374 | 7.73E-06    | 0.63238342   |
| 6447 | DNAH10       | 196385 | 1.00E-05    | 0.626610522  |
| 6448 | METTL7B      | 196410 | 6.58E-06    | 0.635817207  |
| 6449 | CCDC131      | 196441 | 0.005800575 | -0.430035532 |
| 6450 | FAM71C       | 196472 | 5.78E-06    | 0.638557118  |
| 6451 | C12orf12     | 196477 | 0.004559741 | 0.440407878  |
| 6452 | C12orf53     | 196500 | 7.95E-05    | 0.576566525  |
| 6453 | DCP1B        | 196513 | 0.00560324  | -0.431572618 |
| 6454 | ARID2        | 196528 | 0.005966705 | -0.428727018 |
| 6455 | LOC196541    | 196541 | 5.64E-08    | 0.722033856  |
| 6456 | C10orf72     | 196740 | 0.000150344 | 0.559137673  |
| 6457 | ADCY4        | 196883 | 1.32E-09    | 0.775455672  |
| 6458 | LOC196913    | 196913 | 1.15E-11    | 0.849226233  |
| 6459 | C15orf51     | 196968 | 0.002733455 | 0.461446481  |
| 6460 | MGC15885     | 197003 | 4.84E-11    | 0.820936217  |
| 6461 | UBR1         | 197131 | 0.006288174 | -0.426484859 |
| 6462 | Unknown      | 197187 | 0.002029749 | 0.472986379  |
| 6463 | LDHD         | 197257 | 0.005295904 | -0.433994636 |
| 6464 | ZNF778       | 197320 | 1.30E-11    | 0.844483534  |
| 6465 | ZNF553       | 197407 | 0.00607273  | -0.427981751 |
| 6466 | ZNF627       | 199692 | 0.009449501 | -0.407493836 |
| 6467 | GGN          | 199720 | 1.41E-06    | 0.666777308  |
| 6468 | U2AF1L4      | 199746 | 2.05E-10    | 0.800123346  |
| 6469 | ZNF626       | 199777 | 5.20E-11    | 0.819832874  |
| 6470 | ALG14        | 199857 | 7.52E-10    | 0.783023739  |
| 6471 | RP13-15M17.2 | 199953 | 0.000662311 | 0.513394155  |
| 6472 | C1orf86      | 199990 | 0.006416265 | -0.425633264 |
| 6473 | CC2D1B       | 200014 | 8.36E-07    | 0.676475288  |
| 6474 | C1orf100     | 200159 | 4.65E-09    | 0.75859295   |



|      |           |        |             |              |
|------|-----------|--------|-------------|--------------|
| 6475 | KRTCAP2   | 200185 | 0.000116947 | -0.566111259 |
| 6476 | CRTC2     | 200186 | 0.007235581 | -0.420226746 |
| 6477 | C1orf69   | 200205 | 0.008421081 | -0.413015841 |
| 6478 | LOC200261 | 200261 | 2.21E-05    | 0.608574369  |
| 6479 | RNF215    | 200312 | 7.19E-05    | 0.579157283  |
| 6480 | APOBEC3F  | 200316 | 6.56E-06    | 0.635897592  |
| 6481 | CREG2     | 200407 | 0.00021282  | 0.549198213  |
| 6482 | GKN2      | 200504 | 8.45E-10    | 0.781531107  |
| 6483 | C2orf51   | 200523 | 3.32E-06    | 0.6499236    |
| 6484 | PIP5K3    | 200576 | 0.00739786  | -0.419143265 |
| 6485 | LOC200609 | 200609 | 6.11E-10    | 0.785566584  |
| 6486 | KRTCAP3   | 200634 | 0.002306224 | -0.468173518 |
| 6487 | LOC200830 | 200830 | 0.0082477   | -0.414028274 |
| 6488 | KCTD6     | 200845 | 0.000662474 | -0.513375293 |
| 6489 | DHFRL1    | 200895 | 0.008807475 | -0.410922229 |
| 6490 | RPL22L1   | 200916 | 0.005419738 | -0.432961077 |
| 6491 | OSTalpha  | 200931 | 1.56E-07    | 0.705868967  |
| 6492 | GABRR3    | 200959 | 1.29E-05    | 0.620993404  |
| 6493 | FAM18B2   | 201158 | 6.89E-06    | 0.634854886  |
| 6494 | FLCN      | 201163 | 5.62E-05    | 0.585561763  |
| 6495 | LOC201175 | 201175 | 0.009045521 | -0.409593173 |
| 6496 | LOC201181 | 201181 | 9.07E-10    | 0.780598945  |
| 6497 | C17orf74  | 201243 | 0.004636568 | 0.43971729   |
| 6498 | LRRC45    | 201255 | 0.000235996 | 0.546139956  |
| 6499 | RDM1      | 201299 | 4.40E-05    | 0.591720114  |
| 6500 | FBXO15    | 201456 | 1.10E-07    | 0.711439748  |
| 6501 | LOC201477 | 201477 | 1.50E-07    | 0.706419809  |
| 6502 | ZSCAN4    | 201516 | 7.48E-06    | 0.633100478  |
| 6503 | STT3B     | 201595 | 5.00E-05    | -0.588492918 |
| 6504 | FAM116A   | 201627 | 1.02E-05    | -0.626271385 |
| 6505 | VSTM3     | 201633 | 0.001205963 | 0.492364369  |
| 6506 | TMEM154   | 201799 | 0.000152862 | 0.558663814  |
| 6507 | TMEM192   | 201931 | 0.002442544 | -0.465991514 |
| 6508 | RWDD4A    | 201965 | 0.00484864  | -0.437824807 |
| 6509 | Unknown   | 201973 | 0.00348266  | -0.451735808 |
| 6510 | LOC202051 | 202051 | 0.00021378  | 0.549056613  |
| 6511 | RANBP3L   | 202151 | 2.02E-09    | 0.769741223  |
| 6512 | LOC202181 | 202181 | 2.34E-08    | 0.73556122   |
| 6513 | LOC202459 | 202459 | 0.000170689 | 0.555512999  |
| 6514 | KHDRBS2   | 202559 | 1.61E-08    | 0.74119357   |
| 6515 | LOC202781 | 202781 | 0.000925988 | -0.501799671 |
| 6516 | ADCK5     | 203054 | 0.003247151 | -0.454606751 |
| 6517 | LGI3      | 203190 | 1.03E-10    | 0.809395486  |
| 6518 | C9orf91   | 203197 | 0.000429113 | 0.527682054  |
| 6519 | C9orf93   | 203238 | 0.000359079 | 0.53332818   |

|      |           |        |             |              |
|------|-----------|--------|-------------|--------------|
| 6520 | C9orf90   | 203245 | 0.000520024 | 0.521521346  |
| 6521 | CXorf24   | 203414 | 1.04E-07    | 0.712389197  |
| 6522 | ZCCHC5    | 203430 | 0.003436007 | 0.452245215  |
| 6523 | LOC203547 | 203547 | 0.001001241 | -0.499006384 |
| 6524 | TMEM31    | 203562 | 1.05E-05    | 0.625516612  |
| 6525 | TMEM16E   | 203859 | 0.008564681 | 0.41219594   |
| 6526 | LASS3     | 204219 | 1.82E-08    | 0.739369797  |
| 6527 | NLRP11    | 204801 | 0.003385683 | 0.452851742  |
| 6528 | PLAC9     | 219348 | 0.000236794 | 0.546033065  |
| 6529 | MTIF3     | 219402 | 0.008575588 | -0.412135488 |
| 6530 | GSX1      | 219409 | 1.88E-11    | 0.836306934  |
| 6531 | OR5AK4P   | 219525 | 0.000159628 | 0.557428932  |
| 6532 | YPEL4     | 219539 | 5.86E-09    | 0.755329836  |
| 6533 | MED19     | 219541 | 0.002631158 | -0.463000741 |
| 6534 | MGC26647  | 219557 | 0.000631193 | 0.515068436  |
| 6535 | ZNF804B   | 219578 | 7.22E-06    | 0.633826561  |
| 6536 | LOC219690 | 219690 | 4.99E-05    | 0.588542832  |
| 6537 | LOC219731 | 219731 | 1.64E-07    | 0.70500675   |
| 6538 | TYSND1    | 219743 | 0.004010261 | -0.445839107 |
| 6539 | CCNY      | 219771 | 0.003794969 | -0.448156059 |
| 6540 | C10orf27  | 219793 | 9.96E-11    | 0.809857747  |
| 6541 | SLC37A2   | 219855 | 0.002941377 | 0.45858572   |
| 6542 | TMEM136   | 219902 | 5.77E-07    | 0.683278208  |
| 6543 | MRPL21    | 219927 | 0.008882952 | -0.410497137 |
| 6544 | SPATA19   | 219938 | 1.50E-08    | 0.742248346  |
| 6545 | PLAC1L    | 219990 | 1.55E-08    | 0.741752095  |
| 6546 | MGC35295  | 219995 | 1.00E-04    | 0.57045113   |
| 6547 | CYBASC3   | 220002 | 1.09E-08    | 0.746651753  |
| 6548 | LOC220077 | 220077 | 0.001739684 | -0.478821985 |
| 6549 | DLEU7     | 220107 | 0.009263577 | 0.408466016  |
| 6550 | DOK6      | 220164 | 0.002495217 | 0.465116796  |
| 6551 | HEPACAM   | 220296 | 3.20E-06    | 0.650691292  |
| 6552 | TIGD3     | 220359 | 0.003572446 | 0.450682323  |
| 6553 | LOC220906 | 220906 | 0.009380799 | -0.407866796 |
| 6554 | 8-Mar     | 220972 | 0.00220179  | -0.469926737 |
| 6555 | LOC220980 | 220980 | 6.67E-07    | 0.680635367  |
| 6556 | HNRPA3    | 220988 | 0.001189231 | -0.492869825 |
| 6557 | C10orf38  | 221061 | 0.00115829  | -0.493796321 |
| 6558 | ALKBH3    | 221120 | 6.48E-05    | -0.581800247 |
| 6559 | LOC221122 | 221122 | 6.35E-11    | 0.816068824  |
| 6560 | EFHA1     | 221154 | 7.33E-05    | -0.578632634 |
| 6561 | GPR114    | 221188 | 3.91E-09    | 0.761029162  |
| 6562 | CES7      | 221223 | 0.001700278 | 0.479714927  |
| 6563 | C18orf20  | 221241 | 4.58E-05    | 0.590686533  |
| 6564 | FAM26D    | 221301 | 1.31E-08    | 0.744189504  |

|      |           |        |             |              |
|------|-----------|--------|-------------|--------------|
| 6565 | C6orf189  | 221303 | 1.69E-10    | 0.802719295  |
| 6566 | C6orf170  | 221322 | 0.001623296 | -0.481450982 |
| 6567 | OPN5      | 221391 | 0.007502227 | 0.418467058  |
| 6568 | GPR115    | 221393 | 0.006871884 | 0.422553611  |
| 6569 | MGC45491  | 221416 | 1.25E-09    | 0.776149327  |
| 6570 | C6orf154  | 221424 | 4.27E-10    | 0.790231534  |
| 6571 | TREML2P   | 221438 | 5.75E-05    | 0.584917655  |
| 6572 | C6orf128  | 221468 | 1.54E-08    | 0.741859096  |
| 6573 | PI16      | 221476 | 1.05E-08    | 0.747305413  |
| 6574 | C6orf81   | 221481 | 0.000556113 | 0.519307766  |
| 6575 | ZBTB12    | 221527 | 2.33E-08    | 0.735641451  |
| 6576 | ZSCAN12L1 | 221584 | 1.88E-09    | 0.77070781   |
| 6577 | PHACTR1   | 221692 | 9.90E-06    | 0.626877425  |
| 6578 | C6orf218  | 221718 | 0.000788127 | 0.507468778  |
| 6579 | ZNF498    | 221785 | 0.000210862 | 0.549462499  |
| 6580 | LOC221814 | 221814 | 0.002708448 | 0.461816172  |
| 6581 | PRPS1L1   | 221823 | 4.34E-09    | 0.759616336  |
| 6582 | C7orf47   | 221908 | 0.0014462   | -0.485741553 |
| 6583 | C7orf27   | 221927 | 0.001068943 | -0.496615859 |
| 6584 | FOXK1     | 221937 | 0.000813905 | -0.506325056 |
| 6585 | LOC221946 | 221946 | 1.24E-06    | 0.669228695  |
| 6586 | DAGLB     | 221955 | 0.001135377 | -0.494518752 |
| 6587 | C7orf28B  | 221960 | 4.10E-09    | 0.760368163  |
| 6588 | VSTM2A    | 222008 | 7.70E-09    | 0.751593475  |
| 6589 | TMED4     | 222068 | 0.003618611 | -0.450139928 |
| 6590 | RSBN1L    | 222194 | 0.003846004 | -0.447570828 |
| 6591 | FBXL13    | 222235 | 0.000456036 | 0.52577253   |
| 6592 | LNX2      | 222484 | 0.003418819 | -0.4524741   |
| 6593 | GPRC6A    | 222545 | 0.00019518  | 0.55166211   |
| 6594 | RFXDC1    | 222546 | 2.00E-07    | 0.701652136  |
| 6595 | BZRPL1    | 222642 | 3.26E-10    | 0.793868296  |
| 6596 | KCTD20    | 222658 | 0.00018681  | -0.55292406  |
| 6597 | LHFPL5    | 222662 | 0.009240705 | 0.408585007  |
| 6598 | SCUBE3    | 222663 | 0.000538308 | 0.520369585  |
| 6599 | ZSCAN23   | 222696 | 1.30E-11    | 0.844051727  |
| 6600 | TMEM130   | 222865 | 1.43E-10    | 0.805140968  |
| 6601 | FERD3L    | 222894 | 2.46E-09    | 0.76712122   |
| 6602 | CCDC129   | 223075 | 7.87E-11    | 0.813094028  |
| 6603 | SEMA3D    | 223117 | 0.00011411  | 0.566789183  |
| 6604 | MAPK15    | 225689 | 7.37E-05    | 0.578505946  |
| 6605 | SPDYA     | 245711 | 0.005666511 | 0.431083168  |
| 6606 | MS4A6E    | 245802 | 8.86E-07    | 0.675362417  |
| 6607 | VGLL2     | 245806 | 5.77E-09    | 0.755604763  |
| 6608 | CNPY4     | 245812 | 4.54E-09    | 0.758965533  |
| 6609 | DEFB119   | 245932 | 3.66E-07    | 0.691336643  |

|      |           |        |             |              |
|------|-----------|--------|-------------|--------------|
| 6610 | DEFB122   | 245935 | 0.001952478 | 0.474430338  |
| 6611 | DEFB125   | 245938 | 6.07E-08    | 0.720834182  |
| 6612 | ATP6V0D2  | 245972 | 1.65E-06    | 0.663754779  |
| 6613 | TTY7      | 246122 | 0.00171326  | 0.479418395  |
| 6614 | CYorf15A  | 246126 | 4.94E-09    | 0.757707099  |
| 6615 | GAS2L2    | 246176 | 7.18E-05    | 0.579200045  |
| 6616 | CDC26     | 246184 | 0.000119643 | -0.565426788 |
| 6617 | LACE1     | 246269 | 1.02E-08    | 0.747656012  |
| 6618 | D21S2089E | 246312 | 0.001403117 | 0.486868477  |
| 6619 | FLJ13773  | 246318 | 0.008534921 | -0.412369064 |
| 6620 | PELI3     | 246330 | 2.72E-08    | 0.733196008  |
| 6621 | STH       | 246744 | 2.79E-07    | 0.695963552  |
| 6622 | IL27      | 246778 | 9.28E-05    | 0.572431557  |
| 6623 | TMEM9     | 252839 | 9.01E-05    | -0.573218513 |
| 6624 | ZNF396    | 252884 | 7.10E-10    | 0.783752332  |
| 6625 | FNDC5     | 252995 | 1.33E-09    | 0.775253     |
| 6626 | LOC253044 | 253044 | 2.36E-08    | 0.735462735  |
| 6627 | C22orf30  | 253143 | 0.007539911 | -0.418226532 |
| 6628 | LOC253264 | 253264 | 6.39E-09    | 0.754187408  |
| 6629 | LOC253724 | 253724 | 0.000205172 | 0.550213563  |
| 6630 | MSRB3     | 253827 | 5.07E-07    | 0.685557745  |
| 6631 | ZDHHC20   | 253832 | 1.33E-06    | 0.667849929  |
| 6632 | YTHDF3    | 253943 | 0.000785682 | -0.50757215  |
| 6633 | GARNL1    | 253959 | 0.001656653 | -0.480688373 |
| 6634 | LOC253962 | 253962 | 6.27E-07    | 0.68175887   |
| 6635 | KCTD13    | 253980 | 2.59E-11    | 0.830766675  |
| 6636 | ASPHD1    | 253982 | 2.05E-05    | 0.610310897  |
| 6637 | Unknown   | 254013 | 2.34E-08    | 0.7355966    |
| 6638 | LOC254028 | 254028 | 0.000192134 | 0.55214711   |
| 6639 | FLJ25778  | 254048 | 0.00182678  | 0.476960328  |
| 6640 | LOC254100 | 254100 | 1.47E-07    | 0.706800081  |
| 6641 | FLJ30934  | 254122 | 2.21E-06    | 0.658146817  |
| 6642 | LOC254128 | 254128 | 0.002708448 | -0.461812987 |
| 6643 | CXorf58   | 254158 | 2.00E-10    | 0.800424969  |
| 6644 | FBXO33    | 254170 | 0.000904184 | -0.502709488 |
| 6645 | TLL10     | 254173 | 8.76E-09    | 0.749759218  |
| 6646 | RNF169    | 254225 | 0.007527369 | -0.418322023 |
| 6647 | FAM26E    | 254228 | 0.00469007  | 0.439231743  |
| 6648 | BPIL2     | 254240 | 0.003794017 | 0.44817561   |
| 6649 | C1orf62   | 254268 | 9.42E-11    | 0.810571031  |
| 6650 | FLJ40244  | 254272 | 0.009206028 | -0.408759563 |
| 6651 | LOC254312 | 254312 | 0.005128956 | 0.435390895  |
| 6652 | LOC254559 | 254559 | 2.36E-10    | 0.798107497  |
| 6653 | Unknown   | 254778 | 0.000436619 | 0.527158499  |
| 6654 | FAM26C    | 255022 | 1.31E-08    | 0.74415561   |

|      |            |        |             |              |
|------|------------|--------|-------------|--------------|
| 6655 | LOC255025  | 255025 | 1.71E-05    | 0.614498283  |
| 6656 | MPV17L     | 255027 | 1.46E-10    | 0.804861886  |
| 6657 | FLJ35390   | 255031 | 2.76E-08    | 0.732995882  |
| 6658 | C19orf26   | 255057 | 6.02E-11    | 0.817104802  |
| 6659 | CCDC108    | 255101 | 7.12E-11    | 0.814357611  |
| 6660 | Unknown    | 255130 | 3.83E-10    | 0.791692133  |
| 6661 | LOC255167  | 255167 | 0.003762093 | 0.448530553  |
| 6662 | C19orf34   | 255193 | 1.61E-05    | 0.615938614  |
| 6663 | C3orf46    | 255330 | 0.000132576 | 0.562598288  |
| 6664 | LOC255374  | 255374 | 3.02E-06    | 0.651858947  |
| 6665 | TCP11L2    | 255394 | 1.67E-09    | 0.772297272  |
| 6666 | ZNF718     | 255403 | 1.13E-11    | 0.85111575   |
| 6667 | LOC255411  | 255411 | 0.000219134 | 0.548315175  |
| 6668 | LOC255480  | 255480 | 0.00934366  | 0.408040875  |
| 6669 | RNF144B    | 255488 | 0.004817478 | 0.438091813  |
| 6670 | HIST1H2BA  | 255626 | 0.00060379  | 0.516605835  |
| 6671 | PCSK9      | 255738 | 6.36E-06    | 0.636529014  |
| 6672 | C16orf65   | 255762 | 2.95E-09    | 0.764765878  |
| 6673 | Unknown    | 255812 | 0.000217569 | -0.548532421 |
| 6674 | ADAM5P     | 255926 | 9.31E-10    | 0.780234702  |
| 6675 | PAN3       | 255967 | 0.001323078 | -0.489070066 |
| 6676 | ANKRD31    | 256006 | 1.09E-10    | 0.808531823  |
| 6677 | ZNF549     | 256051 | 3.16E-09    | 0.763803989  |
| 6678 | COL29A1    | 256076 | 0.000226476 | 0.547358019  |
| 6679 | SYCE2      | 256126 | 7.94E-10    | 0.782288096  |
| 6680 | NUDT14     | 256281 | 0.008175855 | -0.414427802 |
| 6681 | CCDC110    | 256309 | 0.004046374 | -0.445439614 |
| 6682 | EML3       | 256364 | 0.006627437 | -0.424190147 |
| 6683 | SCML4      | 256380 | 9.87E-10    | 0.779290595  |
| 6684 | ST6GALNAC3 | 256435 | 6.01E-06    | 0.637732214  |
| 6685 | TCERG1L    | 256536 | 2.05E-09    | 0.769466837  |
| 6686 | GLIPR1L1   | 256710 | 0.00078032  | 0.507803344  |
| 6687 | NPB        | 256933 | 4.14E-10    | 0.790773149  |
| 6688 | C17orf66   | 256957 | 0.00067467  | 0.512787052  |
| 6689 | SERINC5    | 256987 | 0.007344635 | -0.419459165 |
| 6690 | PLAC2      | 257000 | 8.21E-05    | 0.575684233  |
| 6691 | FRMD3      | 257019 | 2.38E-10    | 0.798016863  |
| 6692 | PLCXD2     | 257068 | 0.000977699 | 0.499840045  |
| 6693 | GCET2      | 257144 | 2.23E-06    | 0.657905273  |
| 6694 | LOC257152  | 257152 | 0.000118917 | 0.565633685  |
| 6695 | UTS2D      | 257313 | 7.59E-09    | 0.751812683  |
| 6696 | C21orf87   | 257357 | 5.71E-10    | 0.786468645  |
| 6697 | LOC257358  | 257358 | 1.05E-10    | 0.809218241  |
| 6698 | MAP3K7IP3  | 257397 | 0.000164131 | -0.556618832 |
| 6699 | NALCN      | 259232 | 1.59E-06    | 0.664420064  |

|      |               |        |             |              |
|------|---------------|--------|-------------|--------------|
| 6700 | WFDC11        | 259239 | 4.42E-09    | 0.75938842   |
| 6701 | WFDC9         | 259240 | 0.001851349 | 0.476433007  |
| 6702 | MDS2          | 259283 | 0.009902979 | 0.405256244  |
| 6703 | TAS2R39       | 259285 | 1.80E-08    | 0.739536363  |
| 6704 | TAS2R41       | 259287 | 0.000648196 | 0.514188519  |
| 6705 | TAS2R45       | 259291 | 7.61E-10    | 0.782891955  |
| 6706 | TAS2R48       | 259294 | 0.000262843 | 0.54289807   |
| 6707 | TAS2R50       | 259296 | 0.000203733 | 0.55044504   |
| 6708 | MAGI3         | 260425 | 4.38E-10    | 0.789912974  |
| 6709 | PRSS33        | 260429 | 4.91E-08    | 0.72420797   |
| 6710 | C4orf7        | 260436 | 5.75E-10    | 0.786365887  |
| 6711 | TIPRL         | 261726 | 0.000943251 | -0.501076088 |
| 6712 | NPHP4         | 261734 | 0.001188925 | -0.492894071 |
| 6713 | OFCC1         | 266553 | 1.87E-08    | 0.739025868  |
| 6714 | DKFZp686A162' | 266695 | 0.001142944 | 0.494274834  |
| 6715 | Rgr           | 266747 | 0.006555772 | -0.424671247 |
| 6716 | D21S2088E     | 266917 | 1.66E-08    | 0.740728794  |
| 6717 | PGBD2         | 267002 | 0.007473815 | -0.418660424 |
| 6718 | C11orf31      | 280636 | 0.00085918  | -0.504466973 |
| 6719 | SSX7          | 280658 | 2.97E-06    | 0.652238774  |
| 6720 | WFDC10B       | 280664 | 9.91E-09    | 0.748060435  |
| 6721 | LOC280665     | 280665 | 1.21E-05    | 0.62250174   |
| 6722 | IL28A         | 282616 | 2.77E-11    | 0.829376484  |
| 6723 | IL29          | 282618 | 2.91E-08    | 0.732168272  |
| 6724 | AQP11         | 282679 | 0.000533063 | 0.520683092  |
| 6725 | OR51B5        | 282763 | 2.10E-08    | 0.737260795  |
| 6726 | OR5J2         | 282775 | 8.31E-06    | 0.630791959  |
| 6727 | C10orf53      | 282966 | 9.20E-10    | 0.7803852    |
| 6728 | C10orf39      | 282973 | 3.02E-07    | 0.694567696  |
| 6729 | LOC282980     | 282980 | 2.80E-05    | 0.602832886  |
| 6730 | LOC282997     | 282997 | 1.50E-05    | 0.617530353  |
| 6731 | LOC283033     | 283033 | 2.06E-11    | 0.834877146  |
| 6732 | LOC283089     | 283089 | 2.96E-11    | 0.827608456  |
| 6733 | TncRNA        | 283131 | 0.004944681 | -0.43694422  |
| 6734 | LOC283143     | 283143 | 2.82E-07    | 0.695766291  |
| 6735 | FOXR1         | 283150 | 6.09E-08    | 0.720776267  |
| 6736 | OR8D2         | 283160 | 0.00014713  | 0.559755086  |
| 6737 | PRR10         | 283165 | 2.27E-08    | 0.736032702  |
| 6738 | C11orf44      | 283171 | 1.00E-10    | 0.809733904  |
| 6739 | Unknown       | 283194 | 1.09E-08    | 0.746649803  |
| 6740 | P4HA3         | 283208 | 1.46E-09    | 0.77410547   |
| 6741 | FLJ33790      | 283212 | 1.31E-07    | 0.708652895  |
| 6742 | LOC283214     | 283214 | 1.67E-05    | 0.615086393  |
| 6743 | Unknown       | 283232 | 0.004371863 | -0.442145242 |
| 6744 | LOC283267     | 283267 | 1.45E-09    | 0.774122504  |

|      |           |        |             |              |
|------|-----------|--------|-------------|--------------|
| 6745 | Unknown   | 283278 | 0.008461682 | -0.41277011  |
| 6746 | IGSF22    | 283284 | 0.000481258 | -0.524038297 |
| 6747 | C11orf36  | 283303 | 2.31E-06    | 0.657140346  |
| 6748 | UNQ2963   | 283314 | 1.66E-10    | 0.803014746  |
| 6749 | LOC283352 | 283352 | 2.42E-08    | 0.735064071  |
| 6750 | ANKRD52   | 283373 | 0.00952987  | -0.407122883 |
| 6751 | SPRYD4    | 283377 | 9.90E-10    | 0.779228698  |
| 6752 | LOC283387 | 283387 | 2.64E-08    | 0.733658325  |
| 6753 | LOC283392 | 283392 | 1.70E-09    | 0.772011157  |
| 6754 | FLJ33996  | 283401 | 1.63E-05    | 0.615659875  |
| 6755 | LOC283403 | 283403 | 2.27E-09    | 0.768213273  |
| 6756 | LOC283435 | 283435 | 1.91E-08    | 0.738687719  |
| 6757 | MYO1H     | 283446 | 6.38E-06    | 0.636476874  |
| 6758 | MUC19     | 283463 | 4.57E-08    | 0.725352461  |
| 6759 | Unknown   | 283482 | 9.38E-05    | 0.572141882  |
| 6760 | OR7E156P  | 283491 | 4.03E-05    | 0.593890324  |
| 6761 | SUGT1L1   | 283507 | 1.63E-06    | 0.664011676  |
| 6762 | LOC283516 | 283516 | 0.000767107 | 0.508428917  |
| 6763 | LOC283547 | 283547 | 0.000982972 | 0.499665857  |
| 6764 | GPR137C   | 283554 | 0.000369503 | 0.532379815  |
| 6765 | ZDHHC22   | 283576 | 3.09E-05    | 0.600426879  |
| 6766 | TMED8     | 283578 | 0.001817721 | -0.477138099 |
| 6767 | C14orf178 | 283579 | 0.009887456 | 0.405339748  |
| 6768 | LOC283585 | 283585 | 1.28E-05    | 0.621146972  |
| 6769 | LOC283587 | 283587 | 0.000335396 | 0.535500265  |
| 6770 | LOC283588 | 283588 | 3.31E-05    | 0.598805431  |
| 6771 | C14orf68  | 283600 | 4.69E-08    | 0.724946041  |
| 6772 | C14orf70  | 283601 | 0.000125223 | 0.564162407  |
| 6773 | TSSK4     | 283629 | 7.07E-06    | 0.634296733  |
| 6774 | KIAA0284  | 283638 | 0.001141315 | -0.494324378 |
| 6775 | PRTG      | 283659 | 0.000841999 | 0.505155257  |
| 6776 | LOC283663 | 283663 | 3.04E-07    | 0.694470099  |
| 6777 | LOC283674 | 283674 | 0.004295672 | 0.442921131  |
| 6778 | LOC283683 | 283683 | 2.87E-11    | 0.828387823  |
| 6779 | LOC283728 | 283728 | 2.52E-07    | 0.697683726  |
| 6780 | LOC283755 | 283755 | 3.94E-09    | 0.760915404  |
| 6781 | FLJ39743  | 283777 | 0.000392177 | 0.530553622  |
| 6782 | FLJ35785  | 283796 | 0.009976242 | 0.404923662  |
| 6783 | CCDC79    | 283847 | 9.88E-08    | 0.71320468   |
| 6784 | LOC283856 | 283856 | 5.42E-06    | 0.639921014  |
| 6785 | C16orf81  | 283860 | 0.000360094 | 0.533205119  |
| 6786 | LOC283868 | 283868 | 5.48E-10    | 0.787027661  |
| 6787 | NPW       | 283869 | 0.007473997 | -0.418654307 |
| 6788 | LOC283887 | 283887 | 1.42E-06    | 0.666619879  |
| 6789 | LOC283888 | 283888 | 1.81E-06    | 0.661914486  |

|      |           |        |             |              |
|------|-----------|--------|-------------|--------------|
| 6790 | LOC283902 | 283902 | 1.12E-09    | 0.777658941  |
| 6791 | LOC283914 | 283914 | 5.71E-05    | 0.58510495   |
| 6792 | NUDT7     | 283927 | 0.000213562 | 0.549089254  |
| 6793 | LOC283932 | 283932 | 8.55E-06    | 0.630180186  |
| 6794 | MGC46336  | 283933 | 1.29E-05    | 0.620922217  |
| 6795 | C17orf28  | 283987 | 0.000208163 | 0.54982075   |
| 6796 | TSEN54    | 283989 | 0.006578491 | -0.424524148 |
| 6797 | LOC283999 | 283999 | 2.04E-06    | 0.659718933  |
| 6798 | CCDC57    | 284001 | 2.72E-05    | 0.60355023   |
| 6799 | LOC284023 | 284023 | 8.23E-07    | 0.67675284   |
| 6800 | KIAA1267  | 284058 | 6.82E-05    | -0.580488539 |
| 6801 | LOC284080 | 284080 | 9.53E-07    | 0.674039165  |
| 6802 | C17orf47  | 284083 | 4.20E-06    | 0.645168553  |
| 6803 | PIGW      | 284098 | 0.00952987  | -0.40711919  |
| 6804 | C17orf78  | 284099 | 0.00210357  | 0.471665211  |
| 6805 | LOC284100 | 284100 | 2.63E-06    | 0.654665207  |
| 6806 | SLC26A11  | 284129 | 0.007364417 | -0.419333759 |
| 6807 | FLJ35220  | 284131 | 4.95E-06    | 0.641790258  |
| 6808 | GDPD1     | 284161 | 8.02E-05    | 0.576278889  |
| 6809 | C17orf89  | 284184 | 0.005043373 | -0.436124974 |
| 6810 | METRNL    | 284207 | 0.006659837 | -0.423962857 |
| 6811 | LOC284219 | 284219 | 0.00017997  | 0.554008649  |
| 6812 | LOC284240 | 284240 | 3.48E-07    | 0.692203624  |
| 6813 | FAM44C    | 284257 | 0.003860863 | 0.447391444  |
| 6814 | LOC284260 | 284260 | 0.002622404 | 0.463151544  |
| 6815 | LOC284263 | 284263 | 0.001364151 | 0.487949678  |
| 6816 | ZADH2     | 284273 | 0.009310476 | -0.408198225 |
| 6817 | ZIK1      | 284307 | 0.000559186 | 0.519133011  |
| 6818 | ZNF776    | 284309 | 0.004994956 | -0.43651568  |
| 6819 | ZSCAN1    | 284312 | 1.78E-08    | 0.739754001  |
| 6820 | ZNF780A   | 284323 | 7.91E-05    | 0.576707796  |
| 6821 | MGC70924  | 284338 | 2.04E-11    | 0.835211292  |
| 6822 | TMEM145   | 284339 | 2.63E-08    | 0.733707464  |
| 6823 | ZNF575    | 284346 | 0.000354905 | 0.533679496  |
| 6824 | FLJ36070  | 284358 | 1.64E-10    | 0.803274074  |
| 6825 | SIGLECP3  | 284367 | 4.77E-09    | 0.758194279  |
| 6826 | ZNF615    | 284370 | 0.000769953 | 0.508302349  |
| 6827 | Unknown   | 284385 | 0.002778012 | 0.460775813  |
| 6828 | FLJ14959  | 284391 | 1.73E-10    | 0.802240898  |
| 6829 | LOC284402 | 284402 | 1.30E-11    | 0.845853029  |
| 6830 | SLC25A42  | 284439 | 8.92E-11    | 0.811342416  |
| 6831 | HKR1      | 284459 | 0.005094367 | -0.43567126  |
| 6832 | SLC9A11   | 284525 | 6.93E-08    | 0.718738673  |
| 6833 | Unknown   | 284541 | 9.78E-07    | 0.673555238  |
| 6834 | LOC284551 | 284551 | 0.007156028 | 0.420731711  |



|      |              |        |             |              |
|------|--------------|--------|-------------|--------------|
| 6835 | LOC284578    | 284578 | 4.46E-09    | 0.759221977  |
| 6836 | Unknown      | 284610 | 5.65E-05    | 0.585370742  |
| 6837 | SYPL2        | 284612 | 2.02E-08    | 0.737860277  |
| 6838 | CYB561D1     | 284613 | 0.00055007  | -0.519690015 |
| 6839 | ANKRD34A     | 284615 | 5.91E-07    | 0.682829821  |
| 6840 | LOC284648    | 284648 | 0.000585687 | 0.517626646  |
| 6841 | DKFZP564C196 | 284649 | 4.78E-07    | 0.686542936  |
| 6842 | EPHA10       | 284656 | 0.000110334 | 0.567764279  |
| 6843 | LOC284669    | 284669 | 7.64E-09    | 0.751713131  |
| 6844 | Unknown      | 284677 | 0.000841028 | -0.505195378 |
| 6845 | C1orf111     | 284680 | 7.06E-12    | 0.859244491  |
| 6846 | ZNF326       | 284695 | 0.00289144  | -0.459253541 |
| 6847 | FAM80A       | 284716 | 0.001566516 | 0.482732476  |
| 6848 | SLC25A34     | 284723 | 9.42E-11    | 0.810539446  |
| 6849 | LOC284798    | 284798 | 1.32E-06    | 0.667946816  |
| 6850 | Unknown      | 284804 | 2.25E-10    | 0.798858867  |
| 6851 | FLJ33706     | 284805 | 3.75E-10    | 0.79200826   |
| 6852 | C21orf130    | 284835 | 0.009874229 | -0.405419065 |
| 6853 | LOC284865    | 284865 | 1.76E-09    | 0.771522462  |
| 6854 | LOC284898    | 284898 | 9.07E-11    | 0.811087286  |
| 6855 | LOC284912    | 284912 | 1.33E-06    | 0.667794689  |
| 6856 | LOC284939    | 284939 | 4.39E-11    | 0.822063029  |
| 6857 | FLJ39660     | 284992 | 1.13E-05    | 0.624006422  |
| 6858 | LOC285045    | 285045 | 0.00251753  | 0.464773676  |
| 6859 | C2orf61      | 285051 | 0.009400735 | 0.407736401  |
| 6860 | LOC285074    | 285074 | 0.000340664 | -0.535017114 |
| 6861 | Unknown      | 285150 | 0.005917881 | 0.429123963  |
| 6862 | LOC285191    | 285191 | 1.01E-08    | 0.747789459  |
| 6863 | DUSP28       | 285193 | 0.001672524 | -0.480304801 |
| 6864 | LOC285194    | 285194 | 5.81E-05    | 0.584647133  |
| 6865 | FBXW12       | 285231 | 0.001918498 | -0.475086087 |
| 6866 | ZNF619       | 285267 | 1.08E-09    | 0.778188034  |
| 6867 | LOC285286    | 285286 | 1.01E-07    | 0.71289366   |
| 6868 | LOC285300    | 285300 | 1.33E-08    | 0.743914355  |
| 6869 | IGSF10       | 285313 | 6.65E-05    | 0.581123428  |
| 6870 | C3orf23      | 285343 | 0.00062998  | 0.515147514  |
| 6871 | ZNF660       | 285349 | 2.26E-11    | 0.833194243  |
| 6872 | SUMF1        | 285362 | 0.000828736 | -0.505696638 |
| 6873 | PRRT3        | 285368 | 0.00989686  | -0.405296387 |
| 6874 | LOC285382    | 285382 | 6.81E-06    | 0.635083945  |
| 6875 | LOC285389    | 285389 | 4.07E-09    | 0.760461024  |
| 6876 | LOC285422    | 285422 | 4.08E-05    | 0.593599932  |
| 6877 | LOC285423    | 285423 | 0.007344635 | 0.419458288  |
| 6878 | FLJ35424     | 285492 | 0.001973537 | 0.474035504  |
| 6879 | RNF212       | 285498 | 7.74E-06    | 0.632334835  |

|      |               |        |             |              |
|------|---------------|--------|-------------|--------------|
| 6880 | LOC285500     | 285500 | 0.005089888 | 0.43571411   |
| 6881 | FAM13A1OS     | 285512 | 5.63E-06    | 0.639096217  |
| 6882 | GPRIN3        | 285513 | 5.69E-10    | 0.786528974  |
| 6883 | COX18         | 285521 | 8.44E-05    | 0.574973168  |
| 6884 | FRYL          | 285527 | 0.003100435 | -0.456530601 |
| 6885 | LOC285550     | 285550 | 0.000361914 | -0.533013147 |
| 6886 | C4orf37       | 285555 | 0.000562501 | 0.518922961  |
| 6887 | LOC285577     | 285577 | 9.98E-05    | 0.570504702  |
| 6888 | SH3PXD2B      | 285590 | 0.000338439 | 0.535219033  |
| 6889 | LOC285593     | 285593 | 0.000680037 | 0.512533226  |
| 6890 | RELL2         | 285613 | 6.70E-07    | 0.680545022  |
| 6891 | LOC285627     | 285627 | 1.11E-05    | 0.624427986  |
| 6892 | LOC285638     | 285638 | 6.90E-11    | 0.814772698  |
| 6893 | LOC285708     | 285708 | 6.36E-09    | 0.754273959  |
| 6894 | LOC285733     | 285733 | 8.98E-08    | 0.714665167  |
| 6895 | LOC285740     | 285740 | 2.96E-07    | 0.694931909  |
| 6896 | Unknown       | 285754 | 4.08E-07    | 0.689337479  |
| 6897 | LOC285766     | 285766 | 0.003623182 | 0.450084809  |
| 6898 | LOC285768     | 285768 | 1.14E-09    | 0.777389104  |
| 6899 | RP3-398D13.1  | 285780 | 0.000250237 | 0.544361102  |
| 6900 | Unknown       | 285847 | 2.81E-05    | 0.602723507  |
| 6901 | PNPLA1        | 285848 | 1.24E-05    | 0.621902394  |
| 6902 | TREML4        | 285852 | 2.23E-09    | 0.76840229   |
| 6903 | RPL7L1        | 285855 | 0.007096721 | -0.421122465 |
| 6904 | DKFZp564N247. | 285877 | 1.21E-06    | 0.669709522  |
| 6905 | LOC285889     | 285889 | 0.005666511 | 0.431070629  |
| 6906 | LOC285908     | 285908 | 3.00E-07    | 0.694686641  |
| 6907 | LOC285941     | 285941 | 0.006846769 | 0.422731232  |
| 6908 | Unknown       | 285943 | 5.79E-06    | 0.638539734  |
| 6909 | Unknown       | 285949 | 1.90E-09    | 0.77050027   |
| 6910 | C7orf40       | 285958 | 0.001877474 | -0.47588384  |
| 6911 | FLJ40852      | 285962 | 1.09E-08    | 0.746623452  |
| 6912 | LOC285965     | 285965 | 5.48E-06    | 0.63966499   |
| 6913 | FAM139A       | 285966 | 0.001810453 | 0.477301012  |
| 6914 | Unknown       | 285971 | 1.09E-05    | 0.624814182  |
| 6915 | LOC285972     | 285972 | 2.34E-06    | 0.656921527  |
| 6916 | FLJ34048      | 285987 | 0.007566617 | 0.418074048  |
| 6917 | tcag7.929     | 286009 | 7.02E-07    | 0.679652137  |
| 6918 | FLJ40288      | 286023 | 1.55E-11    | 0.839665761  |
| 6919 | NSMCE2        | 286053 | 9.46E-07    | 0.674195624  |
| 6920 | LOC286059     | 286059 | 1.78E-07    | 0.703672311  |
| 6921 | LOC286068     | 286068 | 0.001719728 | 0.479260227  |
| 6922 | FAM83H        | 286077 | 0.007327794 | -0.419603843 |
| 6923 | LOC286083     | 286083 | 2.06E-05    | 0.610184403  |
| 6924 | LOC286114     | 286114 | 7.31E-07    | 0.678893073  |

|      |              |        |             |              |
|------|--------------|--------|-------------|--------------|
| 6925 | C8orf31      | 286122 | 9.14E-07    | 0.674813099  |
| 6926 | SCARA5       | 286133 | 8.00E-07    | 0.677277178  |
| 6927 | LOC286149    | 286149 | 1.22E-09    | 0.776456196  |
| 6928 | FBXO43       | 286151 | 5.80E-07    | 0.683155419  |
| 6929 | LOC286161    | 286161 | 5.39E-07    | 0.684473212  |
| 6930 | LOC286177    | 286177 | 0.003483548 | 0.451711302  |
| 6931 | LOC286178    | 286178 | 4.44E-10    | 0.789748234  |
| 6932 | LOC286189    | 286189 | 2.30E-11    | 0.832677484  |
| 6933 | LOC286190    | 286190 | 0.00013537  | 0.562048619  |
| 6934 | LOC286238    | 286238 | 0.008612883 | 0.411943756  |
| 6935 | FAM78A       | 286336 | 8.50E-06    | 0.630303768  |
| 6936 | LOC286370    | 286370 | 6.34E-06    | 0.636606706  |
| 6937 | LOC286411    | 286411 | 4.16E-05    | 0.593101196  |
| 6938 | H2BFM        | 286436 | 4.75E-07    | 0.68666075   |
| 6939 | LOC286442    | 286442 | 6.67E-10    | 0.784527532  |
| 6940 | YIPF6        | 286451 | 0.009547008 | 0.407037034  |
| 6941 | MAGEB18      | 286514 | 0.000656122 | -0.513745421 |
| 6942 | P2RY8        | 286530 | 0.008444415 | 0.412865913  |
| 6943 | Unknown      | 286756 | 1.72E-08    | 0.740249775  |
| 6944 | TRIM42       | 287015 | 0.007495457 | 0.418512807  |
| 6945 | EIF4E3       | 317649 | 0.000194879 | 0.551708106  |
| 6946 | RFESD        | 317671 | 6.00E-12    | 0.861133666  |
| 6947 | VN1R2        | 317701 | 4.54E-05    | 0.590940828  |
| 6948 | VN1R5        | 317705 | 8.50E-06    | 0.630319445  |
| 6949 | RP11-49G10.8 | 317716 | 1.68E-09    | 0.772197877  |
| 6950 | KLHL10       | 317719 | 0.000218099 | 0.548456838  |
| 6951 | C14orf25     | 319089 | 6.34E-06    | 0.636623808  |
| 6952 | KRT73        | 319101 | 1.49E-11    | 0.840594129  |
| 6953 | MMAB         | 326625 | 0.007035297 | -0.421492451 |
| 6954 | SERPINA9     | 327657 | 0.001820325 | 0.477086171  |
| 6955 | PPM1J        | 333926 | 0.005922723 | -0.42907241  |
| 6956 | KRTAP7-1     | 337878 | 0.000766795 | 0.508446718  |
| 6957 | KRTAP8-1     | 337879 | 7.70E-09    | 0.751604093  |
| 6958 | KRTAP11-1    | 337880 | 1.87E-08    | 0.738977961  |
| 6959 | KRTAP19-1    | 337882 | 0.000224968 | 0.547544574  |
| 6960 | NLRP10       | 338322 | 2.31E-10    | 0.798399154  |
| 6961 | LOC338328    | 338328 | 2.33E-08    | 0.735638905  |
| 6962 | CLEC4D       | 338339 | 4.21E-10    | 0.790496147  |
| 6963 | RAB7B        | 338382 | 0.000859537 | 0.50444477   |
| 6964 | LOC338588    | 338588 | 1.42E-06    | 0.666555513  |
| 6965 | LUZP2        | 338645 | 1.90E-08    | 0.738772255  |
| 6966 | PMP22CD      | 338661 | 1.63E-09    | 0.772600726  |
| 6967 | LOC338809    | 338809 | 2.42E-08    | 0.735052512  |
| 6968 | LOC338817    | 338817 | 2.78E-11    | 0.829202755  |
| 6969 | Unknown      | 338862 | 4.80E-06    | 0.642426159  |

|      |               |        |             |              |
|------|---------------|--------|-------------|--------------|
| 6970 | C1QTNF9       | 338872 | 0.000220325 | 0.54815557   |
| 6971 | LOC338963     | 338963 | 8.45E-07    | 0.676253378  |
| 6972 | RAB43         | 339122 | 0.000129588 | 0.563207699  |
| 6973 | Unknown       | 339166 | 8.41E-05    | 0.57505336   |
| 6974 | TMEM95        | 339168 | 7.52E-07    | 0.678384073  |
| 6975 | ENPP7         | 339221 | 4.69E-06    | 0.642919484  |
| 6976 | C17orf90      | 339229 | 0.000249614 | -0.544439342 |
| 6977 | ARL16         | 339231 | 0.001025273 | -0.498154056 |
| 6978 | LOC339240     | 339240 | 0.008346133 | 0.413495705  |
| 6979 | C17orf51      | 339263 | 7.37E-09    | 0.752243304  |
| 6980 | MSL-1         | 339287 | 0.001032359 | -0.497904711 |
| 6981 | CLEC4G        | 339390 | 1.67E-06    | 0.663493113  |
| 6982 | C1orf174      | 339448 | 0.005784185 | -0.430177928 |
| 6983 | LOC339468     | 339468 | 1.79E-10    | 0.801833887  |
| 6984 | ZBTB8OS       | 339487 | 0.009638607 | 0.406593135  |
| 6985 | LOC339539     | 339539 | 9.27E-07    | 0.674552629  |
| 6986 | LOC339568     | 339568 | 0.009840697 | 0.405581395  |
| 6987 | LOC339593     | 339593 | 4.49E-10    | 0.789614885  |
| 6988 | SLC35E4       | 339665 | 0.009117898 | 0.409199609  |
| 6989 | LOC339666     | 339666 | 4.22E-07    | 0.688793755  |
| 6990 | LOC339751     | 339751 | 1.27E-07    | 0.70912857   |
| 6991 | LOC339766     | 339766 | 2.37E-09    | 0.767617736  |
| 6992 | ESPNL         | 339768 | 0.000286969 | 0.540271106  |
| 6993 | C2orf53       | 339779 | 5.57E-05    | 0.585782846  |
| 6994 | C2orf46       | 339789 | 2.41E-06    | 0.656358382  |
| 6995 | CCDC36        | 339834 | 0.009765215 | 0.405946987  |
| 6996 | LOC339874     | 339874 | 0.000665582 | 0.513221931  |
| 6997 | C3orf35       | 339883 | 0.002688886 | 0.462120189  |
| 6998 | FLJ25770      | 339965 | 2.82E-10    | 0.795673257  |
| 6999 | Unknown       | 339978 | 9.07E-11    | 0.811078042  |
| 7000 | LOC340037     | 340037 | 2.46E-08    | 0.734798938  |
| 7001 | Unknown       | 340085 | 0.002139887 | -0.47102363  |
| 7002 | LOC340094     | 340094 | 2.45E-07    | 0.698155602  |
| 7003 | RP11-145H9.1  | 340156 | 0.003313463 | 0.453764254  |
| 7004 | LOC340178     | 340178 | 9.81E-07    | 0.673472195  |
| 7005 | TREML1        | 340205 | 2.79E-07    | 0.695954825  |
| 7006 | TREML3        | 340206 | 0.000680837 | 0.512493192  |
| 7007 | LOC340239     | 340239 | 5.67E-05    | 0.585283918  |
| 7008 | ABCB5         | 340273 | 0.005139021 | 0.435292467  |
| 7009 | tcag7.1188    | 340340 | 2.87E-11    | 0.828377527  |
| 7010 | LOC340357     | 340357 | 1.37E-12    | 0.875073119  |
| 7011 | RSPO2         | 340419 | 0.004099012 | 0.444907707  |
| 7012 | RP11-262D11.5 | 340527 | 3.01E-06    | 0.651946782  |
| 7013 | VSIG1         | 340547 | 2.14E-08    | 0.736924461  |
| 7014 | ZC3H12B       | 340554 | 0.005497003 | 0.43233648   |

|      |           |        |             |              |
|------|-----------|--------|-------------|--------------|
| 7015 | LHFPL1    | 340596 | 0.000351952 | 0.533961458  |
| 7016 | C10orf112 | 340895 | 3.38E-06    | 0.649596575  |
| 7017 | ANKRD33   | 341405 | 2.90E-11    | 0.828222299  |
| 7018 | H1FNT     | 341567 | 0.000373631 | 0.532045718  |
| 7019 | FREM2     | 341640 | 0.002588832 | 0.463663186  |
| 7020 | GOLGA6    | 342096 | 0.001744826 | 0.47869363   |
| 7021 | FMN1      | 342184 | 1.26E-06    | 0.668835718  |
| 7022 | ZKSCAN2   | 342357 | 1.06E-10    | 0.808853838  |
| 7023 | SMTNL2    | 342527 | 3.55E-07    | 0.691864549  |
| 7024 | STAC2     | 342667 | 2.70E-05    | 0.603755527  |
| 7025 | ZNF284    | 342909 | 0.000222233 | 0.547918913  |
| 7026 | ZSCAN22   | 342945 | 5.38E-08    | 0.722769799  |
| 7027 | NANOS3    | 342977 | 0.001407011 | 0.48675884   |
| 7028 | PRAMEF10  | 343071 | 6.57E-11    | 0.81535916   |
| 7029 | RSPO4     | 343637 | 8.02E-06    | 0.631570327  |
| 7030 | FIGLA     | 344018 | 1.07E-06    | 0.67191871   |
| 7031 | PAQR9     | 344838 | 4.27E-05    | 0.592461108  |
| 7032 | ATP13A5   | 344905 | 1.26E-10    | 0.806584881  |
| 7033 | PLCXD3    | 345557 | 1.62E-05    | 0.615823368  |
| 7034 | ZNF391    | 346157 | 1.64E-10    | 0.803239157  |
| 7035 | 7A5       | 346389 | 3.68E-10    | 0.79231251   |
| 7036 | GNAT3     | 346562 | 4.65E-05    | 0.590268469  |
| 7037 | MOGAT3    | 346606 | 1.93E-08    | 0.738496418  |
| 7038 | FAM71F2   | 346653 | 7.52E-10    | 0.783025714  |
| 7039 | ZNF81     | 347344 | 1.69E-05    | 0.614820218  |
| 7040 | LOC347475 | 347475 | 4.72E-08    | 0.724800537  |
| 7041 | TXNDC6    | 347736 | 3.76E-11    | 0.824455692  |
| 7042 | C6orf52   | 347744 | 1.48E-05    | 0.617836392  |
| 7043 | TBX10     | 347853 | 0.00027991  | 0.541032716  |
| 7044 | PDDC1     | 347862 | 0.009127527 | -0.409152495 |
| 7045 | EP400NL   | 347918 | 2.60E-08    | 0.7339351    |
| 7046 | RBPM52    | 348093 | 1.90E-07    | 0.702522334  |
| 7047 | ANKDD1A   | 348094 | 0.003165656 | 0.45563313   |
| 7048 | LOC348120 | 348120 | 9.25E-05    | 0.572521052  |
| 7049 | LOC348262 | 348262 | 0.006271149 | -0.426608149 |
| 7050 | MGC52498  | 348378 | 2.05E-10    | 0.800059842  |
| 7051 | FAM131C   | 348487 | 0.000900075 | 0.502869467  |
| 7052 | LOC348801 | 348801 | 3.92E-09    | 0.7609879    |
| 7053 | LOC348808 | 348808 | 0.000143121 | 0.560502979  |
| 7054 | TPRXL     | 348825 | 1.69E-08    | 0.740512969  |
| 7055 | ICHTHYIN  | 348938 | 3.38E-08    | 0.729838012  |
| 7056 | NUP43     | 348995 | 0.004944276 | -0.436952487 |
| 7057 | LOC349114 | 349114 | 1.65E-06    | 0.663757065  |
| 7058 | RTN4RL2   | 349667 | 4.32E-07    | 0.688335016  |
| 7059 | C6orf58   | 352999 | 6.44E-05    | 0.582008395  |

|      |            |        |             |              |
|------|------------|--------|-------------|--------------|
| 7060 | RILPL1     | 353116 | 2.46E-09    | 0.767125746  |
| 7061 | LCE1E      | 353135 | 1.73E-09    | 0.771826761  |
| 7062 | LGICZ1     | 353174 | 0.000428001 | 0.527760058  |
| 7063 | SPATA12    | 353324 | 6.25E-08    | 0.720362439  |
| 7064 | BMP8A      | 353500 | 0.003107246 | 0.456433258  |
| 7065 | Unknown    | 353514 | 0.001165318 | 0.493570291  |
| 7066 | IRF2BP2    | 359948 | 0.000879397 | -0.503634207 |
| 7067 | GSTK1      | 373156 | 0.008004399 | -0.415483364 |
| 7068 | CDRT1      | 374286 | 0.001990745 | 0.473697493  |
| 7069 | C10orf96   | 374355 | 5.36E-09    | 0.75661944   |
| 7070 | TBC1D10C   | 374403 | 1.42E-06    | 0.666573374  |
| 7071 | LOC374443  | 374443 | 2.41E-06    | 0.656330534  |
| 7072 | C12orf42   | 374470 | 0.009853003 | 0.405526019  |
| 7073 | HDDC3      | 374659 | 0.001925983 | -0.47493705  |
| 7074 | FAM39DP    | 374666 | 0.007495457 | -0.418512337 |
| 7075 | TEPP       | 374739 | 1.79E-07    | 0.703583138  |
| 7076 | Unknown    | 374768 | 0.001268785 | 0.490529037  |
| 7077 | EFCAB5     | 374786 | 1.09E-08    | 0.74671329   |
| 7078 | C18orf34   | 374864 | 2.94E-07    | 0.695058575  |
| 7079 | ATP9B      | 374868 | 0.000128807 | 0.56337019   |
| 7080 | C19orf45   | 374877 | 6.32E-07    | 0.681610621  |
| 7081 | UNQ501     | 374882 | 0.001545137 | -0.483270178 |
| 7082 | LOC374890  | 374890 | 1.76E-07    | 0.703871768  |
| 7083 | ZNF568     | 374900 | 0.000118917 | 0.56564214   |
| 7084 | IGFL1      | 374918 | 0.002773797 | 0.460845017  |
| 7085 | C1orf187   | 374946 | 6.88E-10    | 0.784140141  |
| 7086 | LOC374973  | 374973 | 0.005203725 | 0.43476336   |
| 7087 | Unknown    | 374977 | 0.005942647 | -0.428936032 |
| 7088 | Unknown    | 375387 | 7.87E-11    | 0.813115792  |
| 7089 | C5orf25    | 375484 | 0.002378316 | -0.467069654 |
| 7090 | GUSBL2     | 375513 | 1.22E-10    | 0.807026735  |
| 7091 | C9orf165   | 375704 | 9.88E-10    | 0.779263984  |
| 7092 | PTAR1      | 375743 | 0.00061645  | -0.515926452 |
| 7093 | AGRN       | 375790 | 0.009570952 | -0.406911204 |
| 7094 | MGC59937   | 375791 | 0.000875944 | 0.503775071  |
| 7095 | RNF126P1   | 376412 | 1.15E-11    | 0.850523286  |
| 7096 | ZC3H6      | 376940 | 0.004253631 | -0.443357924 |
| 7097 | Unknown    | 378820 | 7.99E-07    | 0.677319266  |
| 7098 | RNF148     | 378925 | 1.63E-06    | 0.663964827  |
| 7099 | LOC386597  | 386597 | 3.57E-11    | 0.825331235  |
| 7100 | KRTAP10-11 | 386678 | 1.03E-05    | 0.626040738  |
| 7101 | BC036928   | 386758 | 1.61E-11    | 0.8379975    |
| 7102 | Unknown    | 387036 | 0.000681735 | 0.512437253  |
| 7103 | Unknown    | 387097 | 0.007833943 | 0.416482653  |
| 7104 | C6orf174   | 387104 | 3.27E-06    | 0.650282149  |

|      |           |        |             |              |
|------|-----------|--------|-------------|--------------|
| 7105 | C21orf131 | 387486 | 2.07E-07    | 0.701095023  |
| 7106 | RASL11A   | 387496 | 1.34E-10    | 0.805934975  |
| 7107 | psiTPTE22 | 387590 | 1.29E-09    | 0.775664202  |
| 7108 | UST6      | 387601 | 2.62E-07    | 0.697052724  |
| 7109 | CC2D2B    | 387707 | 5.31E-11    | 0.819413234  |
| 7110 | GVIN1     | 387751 | 0.000492935 | 0.523269028  |
| 7111 | INSC      | 387755 | 3.78E-07    | 0.690748508  |
| 7112 | LOC387790 | 387790 | 0.004017183 | 0.445761668  |
| 7113 | CLEC12B   | 387837 | 1.35E-08    | 0.743741969  |
| 7114 | C13orf21  | 387923 | 3.50E-11    | 0.825597567  |
| 7115 | C14orf23  | 387978 | 2.88E-06    | 0.652837786  |
| 7116 | FAM148B   | 388125 | 0.000120465 | 0.565250089  |
| 7117 | LOC388135 | 388135 | 0.006812273 | 0.422943749  |
| 7118 | FLJ42289  | 388182 | 0.003682341 | 0.449401996  |
| 7119 | LOC388284 | 388284 | 2.79E-11    | 0.828954602  |
| 7120 | LOC388381 | 388381 | 0.000249614 | 0.544439036  |
| 7121 | FLJ31222  | 388387 | 0.000397041 | 0.53016617   |
| 7122 | LOC388419 | 388419 | 7.70E-10    | 0.782712169  |
| 7123 | FLJ12120  | 388439 | 0.000661132 | 0.513451688  |
| 7124 | RGS9BP    | 388531 | 2.34E-05    | 0.60714985   |
| 7125 | KRTDAP    | 388533 | 5.54E-11    | 0.81865188   |
| 7126 | BLOC1S3   | 388552 | 6.25E-11    | 0.816321368  |
| 7127 | ZNF470    | 388566 | 0.000701853 | 0.511461131  |
| 7128 | SLC6A17   | 388662 | 5.92E-06    | 0.638033498  |
| 7129 | FLJ36116  | 388666 | 0.001786921 | 0.477768797  |
| 7130 | NOTCH2NL  | 388677 | 0.006553362 | -0.424690426 |
| 7131 | FLG2      | 388698 | 4.66E-09    | 0.758551204  |
| 7132 | C1orf46   | 388699 | 2.93E-08    | 0.732060886  |
| 7133 | FMO6P     | 388714 | 1.01E-07    | 0.712889597  |
| 7134 | LOC388789 | 388789 | 0.006128475 | -0.427590878 |
| 7135 | LOC388796 | 388796 | 0.003184512 | -0.455373671 |
| 7136 | LOC388820 | 388820 | 3.19E-07    | 0.693647458  |
| 7137 | LOC388882 | 388882 | 6.67E-07    | 0.680650424  |
| 7138 | C22orf36  | 388886 | 1.74E-09    | 0.771677814  |
| 7139 | LOC388889 | 388889 | 4.25E-10    | 0.790321259  |
| 7140 | LOC388906 | 388906 | 1.70E-06    | 0.66309592   |
| 7141 | LOC388948 | 388948 | 0.000563562 | 0.518863289  |
| 7142 | BOLA3     | 388962 | 0.002875368 | -0.45948214  |
| 7143 | LOC388963 | 388963 | 5.46E-10    | 0.787094739  |
| 7144 | LOC388969 | 388969 | 0.002564878 | -0.464053176 |
| 7145 | MUSTN1    | 389125 | 4.16E-08    | 0.726752076  |
| 7146 | FLJ16641  | 389170 | 0.000752876 | 0.50909057   |
| 7147 | LOC389199 | 389199 | 9.00E-06    | 0.628986106  |
| 7148 | CCDC4     | 389206 | 2.05E-07    | 0.701229969  |
| 7149 | LOC389247 | 389247 | 0.005444984 | 0.432762609  |

|      |               |        |             |              |
|------|---------------|--------|-------------|--------------|
| 7150 | C5orf39       | 389289 | 0.007337434 | -0.419506697 |
| 7151 | FLJ27505      | 389320 | 0.00047193  | 0.524682805  |
| 7152 | MGC23985      | 389336 | 0.001599547 | 0.481983292  |
| 7153 | LOC389541     | 389541 | 0.000503092 | -0.522581228 |
| 7154 | C9orf144      | 389715 | 0.000941093 | 0.501169053  |
| 7155 | FLJ46321      | 389763 | 1.57E-11    | 0.838996805  |
| 7156 | IER5L         | 389792 | 0.005490924 | -0.432393274 |
| 7157 | UNQ2541       | 389812 | 0.007411626 | 0.419040386  |
| 7158 | MAP3K15       | 389840 | 0.000178482 | 0.554257991  |
| 7159 | USP27X        | 389856 | 6.69E-08    | 0.719311037  |
| 7160 | tAKR          | 389932 | 0.005474187 | 0.432532766  |
| 7161 | OR51B6        | 390058 | 1.68E-09    | 0.772212241  |
| 7162 | OR51M1        | 390059 | 0.000253998 | 0.5439312    |
| 7163 | OR51I1        | 390063 | 6.19E-11    | 0.816548061  |
| 7164 | OR52D1        | 390066 | 0.002006048 | 0.473413336  |
| 7165 | LOC390595     | 390595 | 7.90E-06    | 0.631919444  |
| 7166 | ANKRD34C      | 390616 | 5.17E-05    | 0.587662509  |
| 7167 | ZNF793        | 390927 | 0.004425237 | -0.441633495 |
| 7168 | LOC390940     | 390940 | 0.005453685 | -0.43268243  |
| 7169 | ZNF805        | 390980 | 0.004854976 | 0.43775602   |
| 7170 | PRAMEF12      | 390999 | 4.89E-06    | 0.642026679  |
| 7171 | LOC391267     | 391267 | 9.68E-10    | 0.779636796  |
| 7172 | Unknown       | 392459 | 3.40E-10    | 0.793349594  |
| 7173 | Unknown       | 394261 | 0.006990899 | 0.421766347  |
| 7174 | SLC25A35      | 399512 | 1.27E-10    | 0.806445291  |
| 7175 | FAM102A       | 399665 | 3.52E-08    | 0.729251885  |
| 7176 | ZNF321        | 399669 | 2.75E-05    | 0.603299058  |
| 7177 | MGC34774      | 399670 | 2.22E-05    | 0.608410145  |
| 7178 | HEATR4        | 399671 | 0.001055119 | 0.497109651  |
| 7179 | MGC50722      | 399693 | 0.005624124 | -0.431418429 |
| 7180 | DKFZp667F0711 | 399716 | 0.000328895 | 0.536151671  |
| 7181 | C10orf114     | 399726 | 0.000660374 | 0.513490829  |
| 7182 | RP11-144G6.7  | 399753 | 1.09E-06    | 0.671548458  |
| 7183 | BMS1P5        | 399761 | 3.82E-07    | 0.690565602  |
| 7184 | FLJ41350      | 399806 | 8.35E-09    | 0.750428973  |
| 7185 | FLJ44653      | 399833 | 0.00070874  | 0.511129263  |
| 7186 | LOC399875     | 399875 | 3.22E-08    | 0.730597155  |
| 7187 | LOC399884     | 399884 | 0.000517888 | 0.521673463  |
| 7188 | LOC399900     | 399900 | 0.001635117 | 0.481179856  |
| 7189 | SNX19         | 399979 | 0.004495027 | 0.440994061  |
| 7190 | LOC400027     | 400027 | 0.001080682 | -0.496230991 |
| 7191 | FLJ40142      | 400073 | 1.02E-05    | 0.626305071  |
| 7192 | FLJ39779      | 400223 | 0.000271302 | 0.541960739  |
| 7193 | LOC400238     | 400238 | 3.66E-09    | 0.761970322  |
| 7194 | C14orf180     | 400258 | 1.59E-06    | 0.664442666  |



|      |              |        |             |              |
|------|--------------|--------|-------------|--------------|
| 7195 | C15orf54     | 400360 | 0.000415284 | 0.528739768  |
| 7196 | Unknown      | 400410 | 7.20E-10    | 0.78358282   |
| 7197 | LOC400456    | 400456 | 5.14E-07    | 0.685341409  |
| 7198 | LOC400506    | 400506 | 1.82E-09    | 0.771093404  |
| 7199 | FLJ21408     | 400512 | 2.66E-10    | 0.796459933  |
| 7200 | LOC400581    | 400581 | 0.005817866 | 0.429903316  |
| 7201 | FLJ38028     | 400643 | 8.53E-05    | 0.574686444  |
| 7202 | LOC400654    | 400654 | 0.001409314 | 0.486679316  |
| 7203 | LOC400655    | 400655 | 3.69E-09    | 0.761837972  |
| 7204 | SIGLECP16    | 400709 | 7.70E-05    | 0.577394469  |
| 7205 | LOC400748    | 400748 | 1.73E-09    | 0.771819887  |
| 7206 | LOC400752    | 400752 | 0.000807961 | 0.50663492   |
| 7207 | LOC400756    | 400756 | 0.002413509 | 0.466479707  |
| 7208 | LOC400794    | 400794 | 8.18E-10    | 0.781926617  |
| 7209 | FLJ90680     | 400926 | 0.000634456 | 0.514866639  |
| 7210 | FLJ27365     | 400931 | 2.88E-06    | 0.652817897  |
| 7211 | FLJ12334     | 400946 | 0.002241331 | 0.469251295  |
| 7212 | Unknown      | 400949 | 9.65E-06    | 0.627439624  |
| 7213 | FLJ30838     | 400955 | 0.006382902 | 0.425851554  |
| 7214 | RGPD1        | 400966 | 2.28E-06    | 0.657400995  |
| 7215 | DKFZp686O132 | 401014 | 6.12E-11    | 0.816869011  |
| 7216 | LOC401022    | 401022 | 2.35E-05    | 0.607069131  |
| 7217 | IQCF3        | 401067 | 0.003579887 | 0.450598512  |
| 7218 | MGC48628     | 401145 | 8.41E-10    | 0.781600481  |
| 7219 | LOC401152    | 401152 | 0.008338221 | -0.41355867  |
| 7220 | FLJ44606     | 401207 | 0.007797555 | 0.41670517   |
| 7221 | FLJ22536     | 401237 | 2.11E-08    | 0.737172553  |
| 7222 | DKFZp451B082 | 401282 | 8.31E-07    | 0.67658403   |
| 7223 | C6orf122     | 401288 | 1.25E-08    | 0.744816547  |
| 7224 | LOC401312    | 401312 | 1.80E-08    | 0.739535944  |
| 7225 | LOC401321    | 401321 | 9.50E-07    | 0.674104457  |
| 7226 | LOC401324    | 401324 | 5.99E-08    | 0.721057277  |
| 7227 | LOC401397    | 401397 | 7.93E-11    | 0.812982324  |
| 7228 | LOC401431    | 401431 | 0.006717607 | 0.423581759  |
| 7229 | LOC401463    | 401463 | 0.007633544 | 0.417665414  |
| 7230 | C8orf59      | 401466 | 0.000616658 | -0.515904933 |
| 7231 | FLJ35024     | 401491 | 0.000765184 | 0.508538886  |
| 7232 | LOC401504    | 401504 | 0.000249119 | -0.544522151 |
| 7233 | Unknown      | 401505 | 0.002606515 | -0.463389671 |
| 7234 | FLJ25917     | 401585 | 1.90E-06    | 0.661091449  |
| 7235 | Unknown      | 401588 | 0.006148421 | -0.427452835 |
| 7236 | MCART6       | 401612 | 1.08E-05    | 0.625010158  |
| 7237 | C10orf132    | 401647 | 2.76E-07    | 0.696096632  |
| 7238 | MGC57346     | 401884 | 5.03E-10    | 0.788163484  |
| 7239 | Unknown      | 402160 | 8.01E-06    | 0.63163115   |

|      |           |        |             |              |
|------|-----------|--------|-------------|--------------|
| 7240 | SOHLH1    | 402381 | 7.28E-06    | 0.633669923  |
| 7241 | LOC402779 | 402779 | 5.88E-11    | 0.817631218  |
| 7242 | PPAPDC2   | 403313 | 0.001841171 | -0.476650595 |
| 7243 | APOBEC4   | 403314 | 2.20E-08    | 0.736502336  |
| 7244 | MGC70870  | 403340 | 0.002398905 | -0.466704758 |
| 7245 | HAPLN4    | 404037 | 3.59E-05    | 0.596781217  |
| 7246 | CUEDC1    | 404093 | 0.005060949 | -0.435969263 |
| 7247 | C4orf12   | 404201 | 2.62E-08    | 0.733777056  |
| 7248 | C10orf85  | 404216 | 0.000139197 | 0.561272537  |
| 7249 | C6orf201  | 404220 | 0.007288292 | 0.419848551  |
| 7250 | AAA1      | 404744 | 3.35E-08    | 0.729990882  |
| 7251 | HERV-FRD  | 405754 | 1.07E-06    | 0.671890245  |
| 7252 | Unknown   | 406996 | 0.000609155 | 0.516321961  |
| 7253 | C10orf31  | 414196 | 2.32E-10    | 0.798309797  |
| 7254 | C10orf103 | 414245 | 1.02E-05    | 0.626307835  |
| 7255 | LOC414300 | 414300 | 4.24E-05    | 0.59265786   |
| 7256 | DDI1      | 414301 | 0.000445048 | 0.526518483  |
| 7257 | C9orf103  | 414328 | 1.62E-08    | 0.741067183  |
| 7258 | Unknown   | 414777 | 4.38E-06    | 0.644288649  |
| 7259 | BLID      | 414899 | 0.004569035 | 0.440328807  |
| 7260 | MGC70857  | 414919 | 0.004261634 | -0.443275952 |
| 7261 | C15orf50  | 414926 | 2.05E-09    | 0.769539675  |
| 7262 | BC038740  | 415056 | 3.26E-08    | 0.730396962  |
| 7263 | C12orf37  | 439916 | 0.000425525 | 0.527956976  |
| 7264 | MXRA7     | 439921 | 0.001470253 | -0.485119594 |
| 7265 | C1orf180  | 439927 | 1.07E-07    | 0.711870984  |
| 7266 | Unknown   | 439931 | 4.15E-11    | 0.822727312  |
| 7267 | Unknown   | 439943 | 0.005925992 | 0.429046499  |
| 7268 | FLJ32742  | 439944 | 1.37E-06    | 0.667353901  |
| 7269 | LOC439951 | 439951 | 2.32E-10    | 0.798316375  |
| 7270 | LOC439990 | 439990 | 3.72E-10    | 0.792121803  |
| 7271 | KRTAP5-2  | 440021 | 2.56E-08    | 0.7341302    |
| 7272 | TMEM41B   | 440026 | 0.000434901 | -0.527286013 |
| 7273 | LOC440028 | 440028 | 0.001307184 | 0.48948706   |
| 7274 | IQSEC3    | 440073 | 2.45E-06    | 0.655998624  |
| 7275 | FLJ12825  | 440101 | 2.90E-05    | 0.602009618  |
| 7276 | LOC440117 | 440117 | 2.70E-05    | 0.603689671  |
| 7277 | FLJ31945  | 440137 | 0.001017878 | 0.498402515  |
| 7278 | MGC88374  | 440184 | 0.003224496 | -0.454871225 |
| 7279 | FLJ41170  | 440200 | 2.23E-11    | 0.833776084  |
| 7280 | Unknown   | 440253 | 6.95E-09    | 0.753035961  |
| 7281 | LOC440268 | 440268 | 4.18E-05    | 0.593007641  |
| 7282 | LOC440356 | 440356 | 0.000714189 | 0.510841215  |
| 7283 | MGC71993  | 440400 | 0.000766795 | -0.508450483 |
| 7284 | CLEC4GP1  | 440508 | 3.96E-07    | 0.689918161  |

|      |             |        |             |              |
|------|-------------|--------|-------------|--------------|
| 7285 | FLJ42875    | 440556 | 1.09E-09    | 0.778018699  |
| 7286 | Unknown     | 440574 | 0.001634119 | -0.481206854 |
| 7287 | LOC440602   | 440602 | 7.80E-05    | 0.577080095  |
| 7288 | NUDT4P1     | 440672 | 4.68E-07    | 0.686929293  |
| 7289 | LRRC52      | 440699 | 6.99E-05    | 0.579890429  |
| 7290 | TRIM67      | 440730 | 6.63E-08    | 0.719458547  |
| 7291 | MGC44328    | 440757 | 9.78E-05    | 0.57104553   |
| 7292 | MIAT        | 440823 | 2.14E-11    | 0.834323381  |
| 7293 | CAPN14      | 440854 | 0.004690117 | -0.439226096 |
| 7294 | LOC440864   | 440864 | 8.52E-09    | 0.75013368   |
| 7295 | LOC440888   | 440888 | 0.003653117 | 0.449720246  |
| 7296 | LOC440905   | 440905 | 1.59E-11    | 0.838563312  |
| 7297 | FLJ33065    | 440952 | 2.15E-07    | 0.700431859  |
| 7298 | LOC440957   | 440957 | 1.25E-10    | 0.806683699  |
| 7299 | LOC440983   | 440983 | 6.17E-07    | 0.682060728  |
| 7300 | Unknown     | 440993 | 5.54E-06    | 0.639422008  |
| 7301 | LOC441046   | 441046 | 6.50E-05    | 0.58172313   |
| 7302 | 11-Mar      | 441061 | 0.000415832 | 0.528691283  |
| 7303 | LOC441086   | 441086 | 2.12E-07    | 0.700638896  |
| 7304 | FLJ42709    | 441094 | 4.08E-05    | 0.593565364  |
| 7305 | LOC441124   | 441124 | 2.17E-10    | 0.799341535  |
| 7306 | LOC441150   | 441150 | 0.008049875 | -0.415231094 |
| 7307 | TMEM151B    | 441151 | 2.63E-05    | 0.604388995  |
| 7308 | hCG_1820801 | 441167 | 3.34E-09    | 0.763125933  |
| 7309 | LOC441204   | 441204 | 0.008576336 | 0.412126926  |
| 7310 | LOC441212   | 441212 | 1.29E-06    | 0.668465917  |
| 7311 | FLJ39080    | 441355 | 1.24E-07    | 0.709561127  |
| 7312 | Unknown     | 441394 | 0.00010692  | 0.568638652  |
| 7313 | LOC441461   | 441461 | 1.73E-10    | 0.802270518  |
| 7314 | LOC441476   | 441476 | 0.004066645 | 0.445224033  |
| 7315 | LOC441528   | 441528 | 0.000210715 | 0.549486763  |
| 7316 | LOC441601   | 441601 | 3.16E-05    | 0.599881563  |
| 7317 | LOC441617   | 441617 | 4.26E-06    | 0.644835989  |
| 7318 | LOC442028   | 442028 | 3.09E-05    | 0.600464155  |
| 7319 | OR2B3P      | 442184 | 0.000904184 | 0.502704163  |
| 7320 | OR5U1       | 442191 | 1.01E-06    | 0.67289624   |
| 7321 | OR10C1      | 442194 | 1.38E-07    | 0.707873898  |
| 7322 | LOC442240   | 442240 | 1.14E-06    | 0.670797729  |
| 7323 | LMOD2       | 442721 | 6.23E-09    | 0.754563476  |
| 7324 | LOC474358   | 474358 | 4.84E-07    | 0.686309895  |
| 7325 | C8orf22     | 492307 | 9.64E-06    | 0.627486608  |
| 7326 | MGC52110    | 493753 | 1.85E-05    | -0.612723963 |
| 7327 | Unknown     | 494115 | 3.08E-10    | 0.79461261   |
| 7328 | RNF165      | 494470 | 0.007720795 | 0.417136325  |
| 7329 | C18orf56    | 494514 | 6.70E-08    | 0.719272529  |

|      |             |        |             |              |
|------|-------------|--------|-------------|--------------|
| 7330 | LOC494558   | 494558 | 2.29E-08    | 0.735894597  |
| 7331 | TIFAB       | 497189 | 0.000373372 | 0.53207076   |
| 7332 | LOC497256   | 497256 | 1.49E-07    | 0.706607827  |
| 7333 | BDNFOS      | 497258 | 1.95E-10    | 0.800703293  |
| 7334 | BEYLA       | 497634 | 0.000108126 | 0.56831462   |
| 7335 | LOC503519   | 503519 | 1.90E-06    | 0.660984776  |
| 7336 | FLJ35946    | 503569 | 3.99E-09    | 0.760701488  |
| 7337 | Unknown     | 541472 | 4.50E-10    | 0.789545838  |
| 7338 | LOC541473   | 541473 | 3.73E-11    | 0.824786015  |
| 7339 | Unknown     | 548332 | 1.62E-06    | 0.66409626   |
| 7340 | Unknown     | 550113 | 2.45E-11    | 0.831881779  |
| 7341 | LOC552889   | 552889 | 0.00172686  | -0.479099239 |
| 7342 | LOC553103   | 553103 | 1.34E-08    | 0.743854006  |
| 7343 | LOC554174   | 554174 | 1.89E-09    | 0.770608755  |
| 7344 | CLLU1       | 574028 | 8.33E-07    | 0.676531286  |
| 7345 | Unknown     | 574037 | 0.002574036 | -0.463894798 |
| 7346 | Unknown     | 574407 | 4.27E-10    | 0.790228243  |
| 7347 | LOC595101   | 595101 | 1.50E-10    | 0.804490873  |
| 7348 | LOC606495   | 606495 | 0.001783052 | 0.47786648   |
| 7349 | LOC613126   | 613126 | 0.002724295 | 0.461598515  |
| 7350 | CTXN3       | 613212 | 1.57E-07    | 0.705720018  |
| 7351 | FDPSL2A     | 619190 | 2.19E-05    | 0.608785272  |
| 7352 | LOC619207   | 619207 | 3.66E-07    | 0.691329346  |
| 7353 | C8orf68     | 619343 | 7.75E-11    | 0.813288085  |
| 7354 | C8orf75     | 619351 | 9.88E-10    | 0.779277554  |
| 7355 | Unknown     | 619426 | 6.13E-08    | 0.720672504  |
| 7356 | C8orf66     | 619427 | 0.000856584 | 0.50458027   |
| 7357 | LOC641298   | 641298 | 0.000313191 | 0.537635431  |
| 7358 | LOC641365   | 641365 | 1.68E-05    | 0.614903926  |
| 7359 | ACOT6       | 641372 | 0.00725627  | 0.420056791  |
| 7360 | SNHG6       | 641638 | 0.000611383 | -0.516187545 |
| 7361 | ECSM2       | 641700 | 0.009347581 | 0.408019021  |
| 7362 | LOC642313   | 642313 | 1.38E-09    | 0.774811323  |
| 7363 | hCG_1795283 | 642345 | 1.25E-09    | 0.776158805  |
| 7364 | LOC642361   | 642361 | 0.009133799 | -0.409120049 |
| 7365 | C10orf109   | 642394 | 4.10E-08    | 0.726979986  |
| 7366 | Unknown     | 642533 | 2.95E-10    | 0.795138227  |
| 7367 | LOC642597   | 642597 | 3.85E-05    | 0.59503715   |
| 7368 | FLJ37786    | 642691 | 0.008979121 | 0.409957411  |
| 7369 | FLJ32756    | 642757 | 0.000478547 | 0.52422069   |
| 7370 | LOC642776   | 642776 | 0.00011733  | 0.566011903  |
| 7371 | LOC642864   | 642864 | 0.009294216 | 0.408288382  |
| 7372 | LQK1        | 642946 | 8.20E-12    | 0.85751233   |
| 7373 | LOC642980   | 642980 | 8.09E-06    | 0.631372259  |
| 7374 | LOC643072   | 643072 | 0.007607571 | -0.417823454 |

|      |             |        |             |              |
|------|-------------|--------|-------------|--------------|
| 7375 | LOC643085   | 643085 | 2.85E-11    | 0.828652485  |
| 7376 | FLJ40292    | 643210 | 6.52E-09    | 0.75390174   |
| 7377 | MGC157906   | 643236 | 3.42E-08    | 0.729646183  |
| 7378 | FLJ44054    | 643365 | 0.00028756  | 0.540210095  |
| 7379 | C14orf176   | 643382 | 3.26E-10    | 0.793903148  |
| 7380 | FLJ40606    | 643549 | 3.68E-07    | 0.691250179  |
| 7381 | LOC643650   | 643650 | 4.84E-06    | 0.642248018  |
| 7382 | hCG_2019139 | 643659 | 0.000436514 | 0.52717716   |
| 7383 | LOC643677   | 643677 | 5.31E-07    | 0.684745682  |
| 7384 | LOC643714   | 643714 | 2.26E-07    | 0.699550321  |
| 7385 | LOC643836   | 643836 | 0.001989053 | -0.473740649 |
| 7386 | CBLN3       | 643866 | 1.02E-05    | 0.62621255   |
| 7387 | LOC643923   | 643923 | 4.55E-09    | 0.758913938  |
| 7388 | LOC643988   | 643988 | 0.007810679 | 0.416624238  |
| 7389 | MGC87895    | 644068 | 0.000802282 | -0.50687855  |
| 7390 | LOC644090   | 644090 | 3.92E-06    | 0.646644262  |
| 7391 | LOC644096   | 644096 | 0.007675404 | -0.417406673 |
| 7392 | LOC644135   | 644135 | 0.000191859 | 0.552190279  |
| 7393 | hCG_1776018 | 644139 | 2.26E-10    | 0.798794771  |
| 7394 | WIPF3       | 644150 | 5.88E-11    | 0.817689011  |
| 7395 | LOC644620   | 644620 | 9.41E-07    | 0.674285439  |
| 7396 | LOC644714   | 644714 | 1.55E-08    | 0.741699357  |
| 7397 | FLJ38596    | 644809 | 1.14E-05    | 0.623802321  |
| 7398 | LOC644852   | 644852 | 0.005198458 | 0.434814528  |
| 7399 | FLJ30064    | 644975 | 2.79E-05    | 0.602882844  |
| 7400 | C1orf200    | 644997 | 1.35E-08    | 0.743723272  |
| 7401 | LOC645212   | 645212 | 0.003583285 | -0.450543761 |
| 7402 | LOC645355   | 645355 | 2.23E-06    | 0.657914841  |
| 7403 | LOC645591   | 645591 | 3.95E-07    | 0.689952177  |
| 7404 | LOC645676   | 645676 | 1.55E-05    | 0.616876253  |
| 7405 | LOC645687   | 645687 | 9.65E-05    | 0.571386445  |
| 7406 | PABPC1L2B   | 645974 | 0.000248898 | 0.54455167   |
| 7407 | LOC645984   | 645984 | 5.71E-05    | 0.585129571  |
| 7408 | CBY3        | 646019 | 2.51E-11    | 0.83133225   |
| 7409 | Unknown     | 646023 | 8.68E-05    | 0.57422998   |
| 7410 | LOC646168   | 646168 | 3.86E-06    | 0.646930011  |
| 7411 | LOC646241   | 646241 | 2.09E-08    | 0.737309956  |
| 7412 | Unknown     | 646329 | 4.49E-09    | 0.759133131  |
| 7413 | Unknown     | 646383 | 0.001423616 | 0.486299701  |
| 7414 | LOC646482   | 646482 | 5.19E-06    | 0.640809004  |
| 7415 | LOC646484   | 646484 | 2.77E-10    | 0.795928919  |
| 7416 | LOC646588   | 646588 | 6.23E-10    | 0.785361977  |
| 7417 | C3orf65     | 646600 | 7.05E-05    | 0.579651988  |
| 7418 | LOC646626   | 646626 | 6.57E-11    | 0.815431839  |
| 7419 | LOC646701   | 646701 | 6.11E-10    | 0.785601751  |

|      |              |        |             |              |
|------|--------------|--------|-------------|--------------|
| 7420 | LOC646778    | 646778 | 1.38E-08    | 0.743449401  |
| 7421 | Unknown      | 646888 | 9.52E-09    | 0.748600547  |
| 7422 | LOC647107    | 647107 | 1.01E-05    | 0.62653441   |
| 7423 | FLJ36848     | 647115 | 1.47E-09    | 0.773939584  |
| 7424 | LOC647309    | 647309 | 1.11E-07    | 0.711359515  |
| 7425 | Unknown      | 647310 | 3.09E-05    | 0.600452841  |
| 7426 | LOC647323    | 647323 | 3.38E-10    | 0.793444408  |
| 7427 | Unknown      | 647476 | 4.32E-07    | 0.688333939  |
| 7428 | Unknown      | 647946 | 0.001205613 | -0.492378976 |
| 7429 | LOC647979    | 647979 | 0.000195899 | -0.551561387 |
| 7430 | FLJ35776     | 649446 | 0.002507987 | 0.464917841  |
| 7431 | PP8961       | 650662 | 5.56E-07    | 0.683931994  |
| 7432 | Unknown      | 653110 | 5.71E-05    | 0.585111561  |
| 7433 | ZBTB8        | 653121 | 0.002578619 | -0.463818429 |
| 7434 | Unknown      | 653390 | 1.13E-06    | 0.670918098  |
| 7435 | PGM5P1       | 653394 | 0.009887456 | 0.405347812  |
| 7436 | GPR89A       | 653519 | 0.001388903 | -0.487255974 |
| 7437 | PHLDB3       | 653583 | 0.009417965 | -0.407637722 |
| 7438 | FAM128A      | 653784 | 0.000610034 | -0.516262891 |
| 7439 | LOC653808    | 653808 | 3.14E-09    | 0.763891813  |
| 7440 | LRTM2        | 654429 | 0.002110342 | 0.471537303  |
| 7441 | SCARNA2      | 677766 | 2.95E-09    | 0.764773182  |
| 7442 | SCARNA15     | 677778 | 0.006846769 | -0.422725203 |
| 7443 | SNORA28      | 677811 | 3.85E-10    | 0.791639158  |
| 7444 | Unknown      | 692205 | 2.66E-11    | 0.829947773  |
| 7445 | CXorf31      | 724087 | 0.00036806  | 0.532504921  |
| 7446 | RNF208       | 727800 | 0.000340664 | 0.5350186    |
| 7447 | LOC727818    | 727818 | 4.16E-07    | 0.689016193  |
| 7448 | LOC727930    | 727930 | 0.000624605 | 0.515435837  |
| 7449 | LOC728073    | 728073 | 0.007628226 | 0.417697619  |
| 7450 | LOC728095    | 728095 | 0.009815317 | 0.405711388  |
| 7451 | Unknown      | 728175 | 1.13E-11    | 0.851198941  |
| 7452 | LOC728190    | 728190 | 6.77E-07    | 0.680328377  |
| 7453 | LOC728192    | 728192 | 2.91E-07    | 0.695255899  |
| 7454 | Unknown      | 728224 | 7.36E-11    | 0.81392733   |
| 7455 | FLJ33544     | 728283 | 9.91E-08    | 0.713160649  |
| 7456 | LOC728353    | 728353 | 1.61E-05    | 0.615893944  |
| 7457 | hCG_2045828  | 728434 | 3.96E-09    | 0.760838961  |
| 7458 | hCG_2020170  | 728437 | 0.005076426 | 0.435827206  |
| 7459 | Unknown      | 728475 | 7.29E-05    | 0.578781846  |
| 7460 | LOC728485    | 728485 | 2.26E-11    | 0.833166776  |
| 7461 | LOC728498    | 728498 | 0.001546962 | -0.483211342 |
| 7462 | LOC728543    | 728543 | 4.61E-05    | 0.590545803  |
| 7463 | CDC2L2       | 728642 | 0.001674556 | -0.48024367  |
| 7464 | RP11-345P4.4 | 728661 | 1.12E-05    | -0.624232039 |

|      |              |           |             |              |
|------|--------------|-----------|-------------|--------------|
| 7465 | LOC728730    | 728730    | 0.004076333 | -0.445123109 |
| 7466 | Unknown      | 728789    | 4.54E-09    | 0.758962365  |
| 7467 | LOC728805    | 728805    | 4.26E-06    | 0.644865288  |
| 7468 | LOC728855    | 728855    | 0.000219864 | -0.548222523 |
| 7469 | LOC728868    | 728868    | 5.70E-07    | 0.683504308  |
| 7470 | Unknown      | 728927    | 3.42E-08    | 0.729666126  |
| 7471 | LOC729059    | 729059    | 6.98E-05    | 0.579918639  |
| 7472 | LOC729082    | 729082    | 0.001069704 | -0.496588446 |
| 7473 | LOC729121    | 729121    | 8.57E-05    | 0.574572263  |
| 7474 | LOC729173    | 729173    | 0.000110183 | 0.567804016  |
| 7475 | LOC729178    | 729178    | 0.003083326 | 0.456748525  |
| 7476 | hCG_2044152  | 729224    | 5.40E-07    | 0.684411262  |
| 7477 | FLJ78302     | 729230    | 2.65E-05    | 0.60416246   |
| 7478 | LOC729291    | 729291    | 3.66E-05    | 0.596291781  |
| 7479 | Unknown      | 729296    | 4.21E-10    | 0.790503687  |
| 7480 | C6orf35      | 729515    | 1.73E-08    | 0.740147222  |
| 7481 | DIRC3        | 729582    | 0.000447348 | 0.526356875  |
| 7482 | Unknown      | 729614    | 5.72E-05    | -0.585049801 |
| 7483 | LOC729680    | 729680    | 0.000113897 | 0.566841328  |
| 7484 | LOC729830    | 729830    | 4.27E-05    | 0.592474467  |
| 7485 | LOC729839    | 729839    | 5.34E-11    | 0.819241642  |
| 7486 | hCG_1994895  | 729866    | 5.14E-06    | 0.641003318  |
| 7487 | LOC729870    | 729870    | 0.006616082 | -0.424276227 |
| 7488 | FLJ30403     | 729975    | 2.45E-05    | 0.606063744  |
| 7489 | LOC730091    | 730091    | 4.10E-09    | 0.760364485  |
| 7490 | LOC730101    | 730101    | 0.000218869 | 0.548352767  |
| 7491 | LOC730184    | 730184    | 1.35E-11    | 0.842342955  |
| 7492 | LOC730441    | 730441    | 3.40E-10    | 0.793336383  |
| 7493 | Unknown      | 730755    | 0.002028185 | 0.4730194    |
| 7494 | LOC731157    | 731157    | 5.27E-05    | 0.58720018   |
| 7495 | Unknown      | 731223    | 0.000354826 | 0.533697632  |
| 7496 | Unknown      | 731424    | 9.42E-11    | 0.810555218  |
| 7497 | LOC731656    | 731656    | 4.45E-09    | 0.759280035  |
| 7498 | Unknown      | 731779    | 3.97E-08    | 0.727411037  |
| 7499 | LOC732096    | 732096    | 6.00E-05    | 0.583789269  |
| 7500 | Unknown      | 732253    | 6.37E-09    | 0.754232617  |
| 7501 | LOC751071    | 751071    | 0.000523755 | -0.521259483 |
| 7502 | PRCD         | 768206    | 2.64E-10    | 0.796584796  |
| 7503 | FAM18A       | 780776    | 3.75E-07    | 0.690917021  |
| 7504 | LOC790955    | 790955    | 0.00024674  | -0.544835117 |
| 7505 | Unknown      | 791114    | 8.00E-07    | 0.677280929  |
| 7506 | Unknown      | 791115    | 2.94E-11    | 0.827976299  |
| 7507 | LOC100049716 | 100049716 | 0.008347797 | -0.41346732  |
| 7508 | Unknown      | 100093630 | 0.004330259 | -0.442574341 |
| 7509 | LOC100093698 | 100093698 | 9.30E-05    | 0.572358021  |

|      |              |           |             |              |
|------|--------------|-----------|-------------|--------------|
| 7510 | Unknown      | 100101266 | 1.05E-09    | 0.778523347  |
| 7511 | Unknown      | 100101467 | 9.28E-09    | 0.748952041  |
| 7512 | Unknown      | 100101938 | 2.95E-06    | 0.652392382  |
| 7513 | LOC100126784 | 100126784 | 2.66E-05    | 0.604078588  |
| 7514 | Unknown      | 100127888 | 0.000868853 | 0.504076197  |
| 7515 | Unknown      | 100127940 | 0.000103566 | 0.569515265  |
| 7516 | Unknown      | 100127972 | 8.35E-08    | 0.715851688  |
| 7517 | Unknown      | 100127980 | 1.76E-09    | 0.771527759  |
| 7518 | Unknown      | 100128003 | 1.33E-07    | 0.708401166  |
| 7519 | Unknown      | 100128025 | 9.33E-10    | 0.780195141  |
| 7520 | Unknown      | 100128071 | 5.34E-07    | 0.684634237  |
| 7521 | Unknown      | 100128081 | 4.81E-05    | 0.589437247  |
| 7522 | Unknown      | 100128098 | 0.000633865 | 0.514899455  |
| 7523 | Unknown      | 100128126 | 3.34E-11    | 0.826228499  |
| 7524 | Unknown      | 100128175 | 5.94E-08    | 0.72120058   |
| 7525 | Unknown      | 100128198 | 6.27E-07    | 0.681749172  |
| 7526 | Unknown      | 100128239 | 9.66E-06    | 0.627414058  |
| 7527 | Unknown      | 100128252 | 0.007000776 | -0.421701841 |
| 7528 | Unknown      | 100128262 | 1.80E-07    | 0.703419255  |
| 7529 | Unknown      | 100128281 | 0.000349102 | 0.53421904   |
| 7530 | Unknown      | 100128292 | 5.77E-10    | 0.786326503  |
| 7531 | Unknown      | 100128298 | 1.48E-05    | 0.617890428  |
| 7532 | Unknown      | 100128343 | 0.008055489 | -0.415188385 |
| 7533 | Unknown      | 100128496 | 6.91E-07    | 0.679950298  |
| 7534 | Unknown      | 100128554 | 6.31E-08    | 0.720205717  |
| 7535 | Unknown      | 100128594 | 0.006293736 | 0.426446236  |
| 7536 | Unknown      | 100128640 | 6.19E-11    | 0.8164623    |
| 7537 | Unknown      | 100128731 | 0.000939426 | -0.501233882 |
| 7538 | Unknown      | 100128737 | 2.63E-09    | 0.766169604  |
| 7539 | Unknown      | 100128751 | 0.009659056 | 0.406482647  |
| 7540 | Unknown      | 100128782 | 0.005792806 | 0.430093144  |
| 7541 | Unknown      | 100128822 | 0.005198458 | -0.434818047 |
| 7542 | Unknown      | 100128840 | 4.05E-05    | 0.593805163  |
| 7543 | Unknown      | 100128946 | 0.004253631 | 0.443354076  |
| 7544 | Unknown      | 100128988 | 6.20E-08    | 0.720492932  |
| 7545 | Unknown      | 100128993 | 2.85E-06    | 0.653106481  |
| 7546 | Unknown      | 100129058 | 3.52E-10    | 0.792889244  |
| 7547 | Unknown      | 100129098 | 0.00718422  | 0.420558005  |
| 7548 | Unknown      | 100129103 | 2.15E-09    | 0.768833324  |
| 7549 | Unknown      | 100129129 | 9.82E-09    | 0.748178307  |
| 7550 | Unknown      | 100129175 | 9.69E-10    | 0.779613267  |
| 7551 | Unknown      | 100129196 | 7.61E-08    | 0.717292299  |
| 7552 | Unknown      | 100129198 | 1.67E-06    | 0.663506298  |
| 7553 | Unknown      | 100129239 | 1.33E-07    | 0.708381718  |
| 7554 | Unknown      | 100129282 | 0.008685603 | 0.411529743  |



|      |         |           |             |              |
|------|---------|-----------|-------------|--------------|
| 7555 | Unknown | 100129380 | 0.007471106 | 0.418689972  |
| 7556 | Unknown | 100129427 | 0.000265816 | 0.542551238  |
| 7557 | Unknown | 100129449 | 1.56E-08    | 0.741594174  |
| 7558 | Unknown | 100129461 | 3.17E-08    | 0.730872025  |
| 7559 | Unknown | 100129503 | 0.002815352 | 0.460289339  |
| 7560 | Unknown | 100129597 | 5.12E-10    | 0.787896205  |
| 7561 | Unknown | 100129603 | 3.10E-06    | 0.651335478  |
| 7562 | Unknown | 100129617 | 0.002945829 | 0.458512229  |
| 7563 | Unknown | 100129662 | 6.02E-11    | 0.81715151   |
| 7564 | Unknown | 100129827 | 2.40E-09    | 0.767475797  |
| 7565 | Unknown | 100129845 | 2.31E-09    | 0.767941074  |
| 7566 | Unknown | 100129852 | 0.002247354 | -0.46913221  |
| 7567 | Unknown | 100129858 | 3.23E-07    | 0.693375811  |
| 7568 | Unknown | 100129884 | 2.38E-10    | 0.797943484  |
| 7569 | Unknown | 100129890 | 1.11E-06    | 0.671200485  |
| 7570 | Unknown | 100130078 | 0.00095186  | 0.500763243  |
| 7571 | Unknown | 100130097 | 5.29E-06    | 0.640417684  |
| 7572 | Unknown | 100130155 | 1.54E-09    | 0.773433441  |
| 7573 | Unknown | 100130175 | 6.35E-08    | 0.72010165   |
| 7574 | Unknown | 100130219 | 1.42E-08    | 0.743000289  |
| 7575 | Unknown | 100130249 | 2.92E-05    | 0.601806884  |
| 7576 | Unknown | 100130264 | 9.53E-06    | 0.627725775  |
| 7577 | Unknown | 100130278 | 8.15E-05    | 0.575886167  |
| 7578 | Unknown | 100130288 | 0.004424596 | -0.441644005 |
| 7579 | Unknown | 100130322 | 3.84E-05    | 0.595107955  |
| 7580 | Unknown | 100130331 | 2.13E-09    | 0.769003249  |
| 7581 | Unknown | 100130353 | 0.004253144 | 0.443368797  |
| 7582 | Unknown | 100130357 | 2.60E-08    | 0.733921109  |
| 7583 | Unknown | 100130360 | 6.15E-06    | 0.637237242  |
| 7584 | Unknown | 100130417 | 0.003766817 | 0.448472861  |
| 7585 | Unknown | 100130418 | 2.31E-11    | 0.83249375   |
| 7586 | Unknown | 100130428 | 4.98E-05    | 0.588593762  |
| 7587 | Unknown | 100130456 | 7.06E-11    | 0.814490035  |
| 7588 | Unknown | 100130458 | 3.14E-06    | 0.65109045   |
| 7589 | Unknown | 100130502 | 1.06E-08    | 0.74718061   |
| 7590 | Unknown | 100130522 | 1.29E-08    | 0.74438235   |
| 7591 | Unknown | 100130548 | 0.002230852 | 0.469442577  |
| 7592 | Unknown | 100130609 | 0.001045713 | 0.497414443  |
| 7593 | Unknown | 100130613 | 1.42E-07    | 0.70741038   |
| 7594 | Unknown | 100130700 | 2.62E-07    | 0.697019028  |
| 7595 | Unknown | 100130705 | 3.89E-07    | 0.690278736  |
| 7596 | Unknown | 100130815 | 7.39E-07    | 0.678707908  |
| 7597 | Unknown | 100130837 | 0.006471896 | -0.425264314 |
| 7598 | Unknown | 100130856 | 7.97E-05    | 0.57651016   |
| 7599 | Unknown | 100130938 | 0.008443816 | 0.412874875  |

|      |         |           |             |              |
|------|---------|-----------|-------------|--------------|
| 7600 | Unknown | 100130958 | 1.64E-09    | 0.772558505  |
| 7601 | Unknown | 100130967 | 2.95E-08    | 0.731964876  |
| 7602 | Unknown | 100130992 | 1.90E-06    | 0.660988153  |
| 7603 | Unknown | 100130998 | 3.44E-06    | 0.649244808  |
| 7604 | Unknown | 100131015 | 1.96E-07    | 0.701987888  |
| 7605 | Unknown | 100131053 | 0.00777169  | 0.416849912  |
| 7606 | Unknown | 100131077 | 7.69E-11    | 0.813387559  |
| 7607 | Unknown | 100131112 | 1.35E-11    | 0.842527724  |
| 7608 | Unknown | 100131117 | 2.13E-08    | 0.736994696  |
| 7609 | Unknown | 100131180 | 7.22E-05    | 0.579050284  |
| 7610 | Unknown | 100131187 | 8.38E-05    | -0.575165255 |
| 7611 | Unknown | 100131213 | 6.65E-10    | 0.784573312  |
| 7612 | Unknown | 100131227 | 8.57E-05    | 0.574587261  |
| 7613 | Unknown | 100131275 | 2.23E-11    | 0.833756196  |
| 7614 | Unknown | 100131283 | 7.98E-05    | -0.576465023 |
| 7615 | Unknown | 100131298 | 4.17E-11    | 0.822523574  |
| 7616 | Unknown | 100131303 | 0.000692835 | 0.511890921  |
| 7617 | Unknown | 100131316 | 0.003298943 | 0.453938548  |
| 7618 | Unknown | 100131354 | 4.02E-11    | 0.823260466  |
| 7619 | Unknown | 100131366 | 0.001253308 | 0.49097833   |
| 7620 | Unknown | 100131508 | 0.005227184 | 0.434560749  |
| 7621 | Unknown | 100131510 | 0.001116324 | 0.495106551  |
| 7622 | Unknown | 100131561 | 0.000855905 | 0.504618603  |
| 7623 | Unknown | 100131581 | 4.89E-09    | 0.757860278  |
| 7624 | Unknown | 100131642 | 1.12E-05    | 0.62421874   |
| 7625 | Unknown | 100131655 | 2.87E-11    | 0.828447183  |
| 7626 | Unknown | 100131733 | 3.83E-07    | 0.690520895  |
| 7627 | Unknown | 100131755 | 0.000448765 | 0.526262776  |
| 7628 | Unknown | 100131766 | 5.36E-10    | 0.787345964  |
| 7629 | Unknown | 100131781 | 3.80E-06    | 0.647284687  |
| 7630 | Unknown | 100131801 | 0.003492906 | -0.45161147  |
| 7631 | Unknown | 100131816 | 5.71E-09    | 0.755745841  |
| 7632 | Unknown | 100131825 | 0.005323946 | 0.433752227  |
| 7633 | Unknown | 100131864 | 1.08E-05    | 0.62497667   |
| 7634 | Unknown | 100131998 | 3.21E-10    | 0.794084072  |
| 7635 | Unknown | 100132005 | 1.70E-10    | 0.802528341  |
| 7636 | Unknown | 100132025 | 0.001973297 | 0.474044977  |
| 7637 | Unknown | 100132051 | 0.00955307  | 0.407001418  |
| 7638 | Unknown | 100132080 | 0.005187165 | 0.434917614  |
| 7639 | Unknown | 100132116 | 5.91E-08    | 0.721324116  |
| 7640 | Unknown | 100132178 | 7.31E-05    | 0.578696494  |
| 7641 | Unknown | 100132234 | 0.000353625 | 0.533808183  |
| 7642 | Unknown | 100132285 | 3.40E-10    | 0.793354502  |
| 7643 | Unknown | 100132354 | 3.80E-05    | 0.595366313  |
| 7644 | Unknown | 100132406 | 0.000624697 | -0.515425715 |

|      |         |           |             |              |
|------|---------|-----------|-------------|--------------|
| 7645 | Unknown | 100132460 | 5.05E-10    | 0.788078318  |
| 7646 | Unknown | 100132476 | 0.001244846 | 0.491233882  |
| 7647 | Unknown | 100132661 | 5.78E-07    | 0.683219583  |
| 7648 | Unknown | 100132686 | 2.48E-11    | 0.831556737  |
| 7649 | Unknown | 100132735 | 0.003822988 | 0.44783155   |
| 7650 | Unknown | 100132911 | 1.32E-09    | 0.775451172  |
| 7651 | Unknown | 100133039 | 0.004226156 | -0.443650353 |
| 7652 | Unknown | 100133089 | 6.79E-07    | 0.68027413   |
| 7653 | Unknown | 100133130 | 0.008239719 | 0.414086811  |
| 7654 | Unknown | 100133131 | 2.48E-05    | 0.605790251  |
| 7655 | Unknown | 100133142 | 4.89E-08    | 0.724282911  |
| 7656 | Unknown | 100133461 | 1.46E-05    | 0.618146931  |
| 7657 | Unknown | 100133660 | 4.55E-05    | 0.590884004  |
| 7658 | Unknown | 100133790 | 1.55E-10    | 0.804105351  |
| 7659 | Unknown | 100133985 | 4.02E-11    | 0.823233495  |
| 7660 | Unknown | 100134259 | 1.30E-11    | 0.846738494  |
| 7661 | Unknown | 100134368 | 1.51E-07    | 0.706282931  |
| 7662 | Unknown | 100134713 | 0.000549478 | 0.519726572  |
| 7663 | Unknown | 100144602 | 0.000418883 | 0.528453782  |
| 7664 | Unknown | 100144604 | 0.002117692 | 0.471400693  |
| 7665 | Unknown | 100144748 | 2.77E-05    | 0.60306332   |
| 7666 | Unknown | 100169989 | 6.34E-05    | 0.582390617  |
| 7667 | Unknown | 100170229 | 8.74E-07    | 0.675629658  |
| 7668 | Unknown | 100170841 | 2.53E-05    | 0.605290898  |
| 7669 | Unknown | 100188953 | 0.000103002 | 0.569673423  |
| 7670 | Unknown | 100192378 | 5.89E-10    | 0.786065337  |
| 7671 | Unknown | 100192379 | 0.000915985 | 0.502195268  |
| 7672 | Unknown | 100192386 | 0.000442766 | 0.526691611  |
| 7673 | Unknown | 100240726 | 1.15E-11    | 0.849720757  |
| 7674 | Unknown | 100240728 | 0.004710959 | 0.439029151  |
| 7675 | Unknown | 100240734 | 0.001453372 | 0.485579695  |
| 7676 | Unknown | 100268168 | 2.38E-05    | 0.606721593  |
| 7677 | Unknown | 100272147 | 0.002688886 | -0.462118711 |
| 7678 | Unknown | 100272228 | 4.93E-09    | 0.757736757  |
| 7679 | Unknown | 100286895 | 1.12E-10    | 0.808202628  |
| 7680 | Unknown | 100286921 | 2.94E-11    | 0.827988873  |
| 7681 | Unknown | 100286987 | 1.47E-07    | 0.706761811  |
| 7682 | Unknown | 100287027 | 0.009148342 | 0.409046501  |
| 7683 | Unknown | 100287037 | 0.001334571 | 0.488760167  |
| 7684 | Unknown | 100287076 | 0.001042073 | 0.497540014  |
| 7685 | Unknown | 100287105 | 6.05E-07    | 0.682397473  |
| 7686 | Unknown | 100287227 | 5.43E-10    | 0.787180395  |
| 7687 | Unknown | 100287290 | 1.12E-08    | 0.746282443  |
| 7688 | Unknown | 100287331 | 0.000650064 | 0.514081699  |
| 7689 | Unknown | 100287372 | 1.49E-07    | 0.706607316  |

|      |         |           |             |              |
|------|---------|-----------|-------------|--------------|
| 7690 | Unknown | 100287426 | 5.60E-08    | 0.722132974  |
| 7691 | Unknown | 100287432 | 0.000291038 | 0.539827854  |
| 7692 | Unknown | 100287525 | 5.57E-11    | 0.818394998  |
| 7693 | Unknown | 100287547 | 1.04E-06    | 0.672439942  |
| 7694 | Unknown | 100287556 | 7.39E-09    | 0.752196622  |
| 7695 | Unknown | 100287558 | 5.26E-11    | 0.819618455  |
| 7696 | Unknown | 100287572 | 0.004759631 | -0.438600852 |
| 7697 | Unknown | 100287584 | 3.21E-08    | 0.730670422  |
| 7698 | Unknown | 100287598 | 9.42E-06    | 0.627995513  |
| 7699 | Unknown | 100287621 | 0.003161257 | 0.455686635  |
| 7700 | Unknown | 100287627 | 0.005783272 | 0.430189065  |
| 7701 | Unknown | 100287704 | 0.000616747 | 0.51589488   |
| 7702 | Unknown | 100287813 | 1.64E-06    | 0.663859063  |
| 7703 | Unknown | 100287877 | 0.000114698 | 0.566644354  |
| 7704 | Unknown | 100287896 | 0.005868932 | -0.429482164 |
| 7705 | Unknown | 100287927 | 4.13E-07    | 0.68914409   |
| 7706 | Unknown | 100287932 | 0.000458697 | -0.525586078 |
| 7707 | Unknown | 100287951 | 0.002425943 | 0.466280232  |
| 7708 | Unknown | 100288092 | 1.59E-09    | 0.772926407  |
| 7709 | Unknown | 100288099 | 2.98E-06    | 0.652119034  |
| 7710 | Unknown | 100288123 | 0.000359079 | -0.533324555 |
| 7711 | Unknown | 100288181 | 0.008186987 | 0.414369353  |
| 7712 | Unknown | 100288194 | 3.06E-11    | 0.827228803  |
| 7713 | Unknown | 100288224 | 3.16E-05    | 0.59988169   |
| 7714 | Unknown | 100288282 | 6.12E-11    | 0.816783343  |
| 7715 | Unknown | 100288490 | 3.97E-11    | 0.82351132   |
| 7716 | Unknown | 100288525 | 0.000659574 | 0.513532051  |
| 7717 | Unknown | 100288594 | 3.47E-05    | 0.597627135  |
| 7718 | Unknown | 100288673 | 0.003383141 | 0.452888679  |
| 7719 | Unknown | 100288701 | 1.34E-09    | 0.775221675  |
| 7720 | Unknown | 100288721 | 1.42E-07    | 0.707378759  |
| 7721 | Unknown | 100288730 | 0.007454102 | -0.418793618 |
| 7722 | Unknown | 100288745 | 0.000998565 | 0.499103545  |
| 7723 | Unknown | 100288797 | 0.000478222 | -0.524257697 |
| 7724 | Unknown | 100288805 | 0.006340658 | 0.42611847   |
| 7725 | Unknown | 100288810 | 4.80E-06    | 0.642402575  |
| 7726 | Unknown | 100288893 | 0.008239719 | 0.414089698  |
| 7727 | Unknown | 100288911 | 1.80E-06    | 0.662010302  |
| 7728 | Unknown | 100288954 | 3.81E-06    | 0.647201561  |
| 7729 | Unknown | 100289071 | 0.000125177 | 0.564183128  |
| 7730 | Unknown | 100289084 | 0.004577973 | -0.440226265 |
| 7731 | Unknown | 100289086 | 0.001504697 | 0.484246487  |
| 7732 | Unknown | 100289098 | 4.19E-10    | 0.790602541  |
| 7733 | Unknown | 100289210 | 2.05E-10    | 0.800058889  |
| 7734 | Unknown | 100289251 | 1.70E-10    | 0.802631862  |

|      |         |           |             |              |
|------|---------|-----------|-------------|--------------|
| 7735 | Unknown | 100289336 | 1.16E-05    | 0.623407946  |
| 7736 | Unknown | 100289361 | 0.008007397 | -0.415463586 |
| 7737 | Unknown | 100289366 | 9.36E-09    | 0.748830365  |
| 7738 | Unknown | 100289373 | 3.61E-08    | 0.728861216  |
| 7739 | Unknown | 100289436 | 5.82E-08    | 0.72156681   |
| 7740 | Unknown | 100289465 | 0.001263402 | 0.490706198  |
| 7741 | Unknown | 100289508 | 0.003217301 | 0.454964222  |
| 7742 | Unknown | 100289509 | 3.22E-05    | 0.599451159  |
| 7743 | Unknown | 100289632 | 0.000416501 | 0.528640827  |
| 7744 | Unknown | 100289635 | 0.006569806 | -0.424579567 |
| 7745 | Unknown | 100290278 | 8.07E-11    | 0.812713683  |
| 7746 | Unknown | 100292863 | 8.22E-07    | 0.676789066  |
| 7747 | Unknown | 100292909 | 4.77E-11    | 0.821085246  |
| 7748 | Unknown | 100293553 | 2.00E-06    | 0.660093668  |
| 7749 | Unknown | 100293559 | 2.61E-11    | 0.830385777  |
| 7750 | Unknown | 100294720 | 0.000122077 | 0.564878731  |
| 7751 | Unknown | 100302522 | 0.001843503 | 0.47659848   |
| 7752 | Unknown | 100302691 | 0.003247151 | 0.454610907  |
| 7753 | Unknown | 100302737 | 2.28E-05    | 0.607802477  |
| 7754 | Unknown | 100309464 | 4.25E-10    | 0.79032045   |
| 7755 | Unknown | 100316868 | 7.80E-09    | 0.751391023  |
| 7756 | Unknown | 100379661 | 0.000542327 | 0.520146493  |
| 7757 | Unknown | 100422737 | 0.000118917 | 0.56563129   |
| 7758 | Unknown | 100422781 | 0.00016056  | 0.557250201  |
| 7759 | Unknown | 100498859 | 0.004298526 | 0.44288665   |
| 7760 | Unknown | 100499177 | 0.003510985 | -0.451403766 |
| 7761 | Unknown | 100499193 | 4.62E-05    | 0.590413475  |
| 7762 | Unknown | 100499194 | 9.36E-11    | 0.810699508  |
| 7763 | Unknown | 100499441 | 0.000280719 | 0.540937435  |
| 7764 | Unknown | 100499489 | 1.62E-08    | 0.741118048  |
| 7765 | Unknown | 100505478 | 8.01E-11    | 0.812870643  |
| 7766 | Unknown | 100505481 | 0.001588592 | 0.482241645  |
| 7767 | Unknown | 100505490 | 1.20E-11    | 0.848626377  |
| 7768 | Unknown | 100505498 | 9.40E-10    | 0.780066214  |
| 7769 | Unknown | 100505515 | 8.38E-09    | 0.750374521  |
| 7770 | Unknown | 100505522 | 0.005633326 | -0.431336594 |
| 7771 | Unknown | 100505593 | 0.003502483 | -0.451504824 |
| 7772 | Unknown | 100505598 | 2.51E-07    | 0.697796551  |
| 7773 | Unknown | 100505600 | 3.23E-07    | 0.693393466  |
| 7774 | Unknown | 100505601 | 0.00743293  | -0.418913933 |
| 7775 | Unknown | 100505609 | 0.00049996  | 0.522793033  |
| 7776 | Unknown | 100505649 | 0.00095385  | 0.500683125  |
| 7777 | Unknown | 100505697 | 0.000379783 | 0.531543975  |
| 7778 | Unknown | 100505711 | 1.35E-07    | 0.708127316  |
| 7779 | Unknown | 100505712 | 0.000992659 | -0.499317553 |

|      |         |           |             |              |
|------|---------|-----------|-------------|--------------|
| 7780 | Unknown | 100505774 | 0.004175978 | 0.444152927  |
| 7781 | Unknown | 100505786 | 4.24E-06    | 0.644972177  |
| 7782 | Unknown | 100505797 | 5.15E-09    | 0.757131845  |
| 7783 | Unknown | 100505805 | 0.005208815 | 0.434716814  |
| 7784 | Unknown | 100505808 | 1.27E-10    | 0.806549999  |
| 7785 | Unknown | 100505820 | 1.70E-10    | 0.802629319  |
| 7786 | Unknown | 100505833 | 0.000618268 | 0.515770869  |
| 7787 | Unknown | 100505842 | 2.12E-08    | 0.737124116  |
| 7788 | Unknown | 100505852 | 0.000669466 | 0.513035422  |
| 7789 | Unknown | 100505862 | 9.65E-11    | 0.810226386  |
| 7790 | Unknown | 100505875 | 6.57E-05    | 0.581471872  |
| 7791 | Unknown | 100505881 | 9.56E-05    | 0.571618902  |
| 7792 | Unknown | 100505885 | 2.94E-06    | 0.652464355  |
| 7793 | Unknown | 100505903 | 0.001414959 | 0.486514323  |
| 7794 | Unknown | 100505928 | 1.24E-05    | 0.621881648  |
| 7795 | Unknown | 100505935 | 1.38E-10    | 0.805552722  |
| 7796 | Unknown | 100505956 | 0.001734576 | 0.478927877  |
| 7797 | Unknown | 100505960 | 0.0076713   | -0.417442534 |
| 7798 | Unknown | 100505967 | 3.70E-09    | 0.761783854  |
| 7799 | Unknown | 100505986 | 3.41E-05    | 0.598107926  |
| 7800 | Unknown | 100506012 | 1.49E-11    | 0.84033382   |
| 7801 | Unknown | 100506014 | 6.60E-05    | 0.581322157  |
| 7802 | Unknown | 100506030 | 2.89E-07    | 0.695357989  |
| 7803 | Unknown | 100506037 | 4.50E-06    | 0.643740181  |
| 7804 | Unknown | 100506047 | 4.22E-08    | 0.726555357  |
| 7805 | Unknown | 100506051 | 1.66E-06    | 0.663648808  |
| 7806 | Unknown | 100506082 | 0.002251868 | 0.469054607  |
| 7807 | Unknown | 100506088 | 9.54E-07    | 0.674012413  |
| 7808 | Unknown | 100506100 | 0.00064862  | 0.514155428  |
| 7809 | Unknown | 100506114 | 0.00075484  | 0.509002314  |
| 7810 | Unknown | 100506125 | 1.28E-05    | 0.621218785  |
| 7811 | Unknown | 100506172 | 1.90E-06    | 0.660987839  |
| 7812 | Unknown | 100506216 | 9.21E-08    | 0.714260847  |
| 7813 | Unknown | 100506234 | 0.000148081 | 0.559553638  |
| 7814 | Unknown | 100506237 | 0.000157089 | 0.557901871  |
| 7815 | Unknown | 100506238 | 4.91E-08    | 0.724198357  |
| 7816 | Unknown | 100506245 | 5.64E-05    | 0.585447993  |
| 7817 | Unknown | 100506259 | 9.55E-05    | 0.571662425  |
| 7818 | Unknown | 100506266 | 0.000381694 | -0.531394276 |
| 7819 | Unknown | 100506267 | 0.00046186  | 0.525382143  |
| 7820 | Unknown | 100506288 | 2.32E-10    | 0.79829831   |
| 7821 | Unknown | 100506348 | 1.83E-05    | 0.613027446  |
| 7822 | Unknown | 100506354 | 4.49E-07    | 0.687627513  |
| 7823 | Unknown | 100506379 | 1.68E-05    | 0.615014351  |
| 7824 | Unknown | 100506380 | 3.34E-08    | 0.730009765  |

|      |         |           |             |              |
|------|---------|-----------|-------------|--------------|
| 7825 | Unknown | 100506418 | 0.008944518 | -0.410151576 |
| 7826 | Unknown | 100506430 | 0.001030358 | 0.497980836  |
| 7827 | Unknown | 100506436 | 6.68E-09    | 0.753578212  |
| 7828 | Unknown | 100506457 | 3.23E-09    | 0.763538506  |
| 7829 | Unknown | 100506470 | 0.00014773  | 0.559632783  |
| 7830 | Unknown | 100506480 | 0.007141037 | 0.420826163  |
| 7831 | Unknown | 100506521 | 0.001711688 | 0.479463397  |
| 7832 | Unknown | 100506530 | 1.06E-06    | 0.672024995  |
| 7833 | Unknown | 100506555 | 0.007884411 | 0.416186066  |
| 7834 | Unknown | 100506558 | 0.000772722 | 0.508155855  |
| 7835 | Unknown | 100506652 | 0.007431381 | 0.418927161  |
| 7836 | Unknown | 100506676 | 4.64E-08    | 0.725099333  |
| 7837 | Unknown | 100506677 | 7.40E-08    | 0.717730139  |
| 7838 | Unknown | 100506696 | 0.000520679 | 0.521479739  |
| 7839 | Unknown | 100506714 | 4.60E-10    | 0.789228137  |
| 7840 | Unknown | 100506727 | 0.001347258 | -0.488418957 |
| 7841 | Unknown | 100506733 | 0.004681252 | 0.439321289  |
| 7842 | Unknown | 100506757 | 0.003887339 | 0.447106289  |
| 7843 | Unknown | 100506762 | 8.89E-11    | 0.811403414  |
| 7844 | Unknown | 100506767 | 0.000232011 | 0.546640953  |
| 7845 | Unknown | 100506797 | 2.68E-08    | 0.733434211  |
| 7846 | Unknown | 100506816 | 6.77E-05    | 0.580683025  |
| 7847 | Unknown | 100506834 | 1.99E-10    | 0.800525743  |
| 7848 | Unknown | 100506843 | 0.000528395 | 0.520974029  |
| 7849 | Unknown | 100506851 | 1.95E-07    | 0.702067261  |
| 7850 | Unknown | 100506858 | 5.03E-11    | 0.82036628   |
| 7851 | Unknown | 100506860 | 3.75E-09    | 0.761597035  |
| 7852 | Unknown | 100506866 | 2.29E-05    | 0.607684694  |
| 7853 | Unknown | 100506880 | 3.05E-05    | 0.600778796  |
| 7854 | Unknown | 100506907 | 8.44E-07    | 0.676268231  |
| 7855 | Unknown | 100506958 | 0.001188925 | 0.49288343   |
| 7856 | Unknown | 100506992 | 0.000965391 | 0.500285792  |
| 7857 | Unknown | 100506995 | 1.11E-09    | 0.777793933  |
| 7858 | Unknown | 100506997 | 2.41E-10    | 0.797749448  |
| 7859 | Unknown | 100507009 | 4.80E-07    | 0.686463082  |
| 7860 | Unknown | 100507028 | 6.57E-05    | 0.581447565  |
| 7861 | Unknown | 100507049 | 0.003202436 | 0.455152298  |
| 7862 | Unknown | 100507054 | 0.005490423 | 0.432407142  |
| 7863 | Unknown | 100507063 | 3.36E-08    | 0.72994048   |
| 7864 | Unknown | 100507077 | 7.91E-09    | 0.751174427  |
| 7865 | Unknown | 100507098 | 0.000376703 | 0.531791324  |
| 7866 | Unknown | 100507109 | 4.82E-06    | 0.642342498  |
| 7867 | Unknown | 100507123 | 2.90E-11    | 0.828186109  |
| 7868 | Unknown | 100507156 | 6.19E-11    | 0.816486709  |
| 7869 | Unknown | 100507164 | 0.000100825 | 0.570229432  |

|      |         |           |             |              |
|------|---------|-----------|-------------|--------------|
| 7870 | Unknown | 100507177 | 3.20E-06    | 0.650678424  |
| 7871 | Unknown | 100507193 | 3.83E-05    | 0.595196335  |
| 7872 | Unknown | 100507194 | 1.73E-10    | 0.802329485  |
| 7873 | Unknown | 100507215 | 3.89E-05    | 0.594779744  |
| 7874 | Unknown | 100507224 | 0.00028189  | 0.540795961  |
| 7875 | Unknown | 100507226 | 1.56E-08    | 0.741577282  |
| 7876 | Unknown | 100507250 | 0.004417445 | -0.441723542 |
| 7877 | Unknown | 100507291 | 8.86E-08    | 0.714901029  |
| 7878 | Unknown | 100507303 | 0.002108035 | -0.471586763 |
| 7879 | Unknown | 100507307 | 8.01E-11    | 0.812839245  |
| 7880 | Unknown | 100507362 | 3.63E-08    | 0.72878658   |
| 7881 | Unknown | 100507390 | 2.77E-11    | 0.829358262  |
| 7882 | Unknown | 100507408 | 9.77E-10    | 0.779499179  |
| 7883 | Unknown | 100507424 | 0.005251664 | -0.434362127 |
| 7884 | Unknown | 100507443 | 3.80E-05    | 0.595410144  |
| 7885 | Unknown | 100507454 | 0.002204878 | 0.469869333  |
| 7886 | Unknown | 100507461 | 3.11E-05    | 0.600263668  |
| 7887 | Unknown | 100507466 | 0.003539423 | 0.451056555  |
| 7888 | Unknown | 100507492 | 5.93E-08    | 0.721258152  |
| 7889 | Unknown | 100507525 | 2.74E-07    | 0.696219178  |
| 7890 | Unknown | 100507531 | 2.56E-09    | 0.766523941  |
| 7891 | Unknown | 100507540 | 0.000596761 | 0.517001076  |
| 7892 | Unknown | 100507560 | 0.000494146 | 0.523170144  |
| 7893 | Unknown | 100507572 | 2.04E-05    | 0.610448748  |
| 7894 | Unknown | 100507596 | 2.27E-06    | 0.657569445  |
| 7895 | Unknown | 100507620 | 0.001523368 | 0.483804833  |
| 7896 | Unknown | 100507625 | 3.55E-08    | 0.729122375  |
| 7897 | Unknown | 100507652 | 0.002989023 | 0.457936778  |
| 7898 | Unknown | 100507675 | 3.74E-11    | 0.824641267  |
| 7899 | Unknown | 100507741 | 1.66E-10    | 0.802989496  |
| 7900 | Unknown | 100507745 | 2.66E-09    | 0.766038705  |
| 7901 | Unknown | 100507904 | 1.60E-07    | 0.705416117  |
| 7902 | Unknown | 100507928 | 4.68E-09    | 0.75848583   |
| 7903 | Unknown | 100508095 | 2.09E-08    | 0.73736027   |
| 7904 | Unknown | 100508124 | 8.29E-05    | 0.575431145  |
| 7905 | Unknown | 100508176 | 0.0055769   | -0.431768871 |
| 7906 | Unknown | 100508307 | 4.08E-07    | 0.689334665  |
| 7907 | Unknown | 100508341 | 5.31E-05    | 0.586971652  |
| 7908 | Unknown | 100508368 | 1.18E-06    | 0.670020268  |
| 7909 | Unknown | 100508428 | 0.004807943 | 0.438169368  |
| 7910 | Unknown | 100508528 | 0.001924199 | 0.47497827   |
| 7911 | Unknown | 100508567 | 2.67E-07    | 0.696693385  |
| 7912 | Unknown | 100508624 | 8.41E-09    | 0.75030075   |
| 7913 | Unknown | 100508657 | 3.08E-09    | 0.764201221  |
| 7914 | Unknown | 100508709 | 0.00026456  | 0.542707351  |



|      |         |           |             |              |
|------|---------|-----------|-------------|--------------|
| 7915 | Unknown | 100508787 | 2.12E-08    | 0.737082154  |
| 7916 | Unknown | 100508889 | 4.86E-05    | 0.589153468  |
| 7917 | Unknown | 100508951 | 0.00135838  | 0.488093875  |
| 7918 | Unknown | 100508968 | 8.82E-06    | 0.629458716  |
| 7919 | Unknown | 100509020 | 0.001881354 | -0.475805661 |
| 7920 | Unknown | 100509030 | 5.20E-11    | 0.81985408   |
| 7921 | Unknown | 100509093 | 5.20E-08    | 0.723311046  |
| 7922 | Unknown | 100509139 | 4.08E-06    | 0.645781699  |
| 7923 | Unknown | 100509212 | 2.08E-06    | 0.659276698  |
| 7924 | Unknown | 100509388 | 2.58E-06    | 0.655037626  |
| 7925 | Unknown | 100509550 | 1.18E-07    | 0.710311815  |
| 7926 | Unknown | 100509621 | 0.006596915 | 0.424396982  |
| 7927 | Unknown | 100509639 | 2.61E-11    | 0.830560027  |
| 7928 | Unknown | 100509662 | 3.35E-07    | 0.692781307  |
| 7929 | Unknown | 100509761 | 0.000770368 | 0.508278802  |
| 7930 | Unknown | 100509762 | 0.000904266 | 0.502695685  |
| 7931 | Unknown | 100509893 | 3.51E-06    | 0.648835364  |
| 7932 | Unknown | 100510080 | 1.26E-09    | 0.775976797  |
| 7933 | Unknown | 100510453 | 0.001635941 | 0.481158177  |

**Gene IDs did not match any gene symbols were defined as "Unknown".**
